# Supplementary material for: Metathesis of Ge=Ge double bonds
Source: Springer Nature journal article supplement (doi:10.1038/s41557-021-00639-9), 2021-03-01
Supplement: 41557_2021_639_MOESM20_ESM.cif [file 41557_2021_639_MOESM20_ESM.cif]

 
data_sh4147 
  
_audit_creation_method            'SHELXL-2018/3' 
_shelx_SHELXL_version_number      '2018/3' 
_chemical_name_systematic         ? 
_chemical_name_common             ? 
_chemical_melting_point           ? 
_chemical_formula_moiety          
 'C70 H86 Ge2 N2 Si2'  
_chemical_formula_sum 
 'C70 H86 Ge2 N2 Si2' 
_chemical_formula_weight          1156.76 
  
loop_ 
 _atom_type_symbol 
 _atom_type_description 
 _atom_type_scat_dispersion_real 
 _atom_type_scat_dispersion_imag 
 _atom_type_scat_source 
 'C'  'C'   0.0033   0.0016 
 'International Tables Vol C Tables 4.2.6.8 and 6.1.1.4' 
 'H'  'H'   0.0000   0.0000 
 'International Tables Vol C Tables 4.2.6.8 and 6.1.1.4' 
 'N'  'N'   0.0061   0.0033 
 'International Tables Vol C Tables 4.2.6.8 and 6.1.1.4' 
 'Si'  'Si'   0.0817   0.0704 
 'International Tables Vol C Tables 4.2.6.8 and 6.1.1.4' 
 'Ge'  'Ge'   0.1547   1.8001 
 'International Tables Vol C Tables 4.2.6.8 and 6.1.1.4' 
  
_space_group_crystal_system       monoclinic 
_space_group_IT_number            15 
_space_group_name_H-M_alt         'C 2/c' 
_space_group_name_Hall            '-C 2yc' 
  
_shelx_space_group_comment 
; 
The symmetry employed for this shelxl refinement is uniquely defined 
by the following loop, which should always be used as a source of 
symmetry information in preference to the above space-group names. 
They are only intended as comments. 
; 
  
loop_ 
 _space_group_symop_operation_xyz 
 'x, y, z' 
 '-x, y, -z+1/2' 
 'x+1/2, y+1/2, z' 
 '-x+1/2, y+1/2, -z+1/2' 
 '-x, -y, -z' 
 'x, -y, z-1/2' 
 '-x+1/2, -y+1/2, -z' 
 'x+1/2, -y+1/2, z-1/2' 
  
_cell_length_a                    20.8248(6) 
_cell_length_b                    13.2686(6) 
_cell_length_c                    24.3799(9) 
_cell_angle_alpha                 90 
_cell_angle_beta                  112.992(3) 
_cell_angle_gamma                 90 
_cell_volume                      6201.4(4) 
_cell_formula_units_Z             4 
_cell_measurement_temperature     152(2) 
_cell_measurement_reflns_used     9752 
_cell_measurement_theta_min       2.25 
_cell_measurement_theta_max       33.21 
  
_exptl_crystal_description        block 
_exptl_crystal_colour             orange 
_exptl_crystal_density_meas       ? 
_exptl_crystal_density_method     ? 
_exptl_crystal_density_diffrn     1.239 
_exptl_crystal_F_000              2448 
_exptl_transmission_factor_min    ? 
_exptl_transmission_factor_max    ? 
_exptl_crystal_size_max           0.270 
_exptl_crystal_size_mid           0.253 
_exptl_crystal_size_min           0.180 
_exptl_absorpt_coefficient_mu     1.050 
_shelx_estimated_absorpt_T_min    0.765 
_shelx_estimated_absorpt_T_max    0.834 
_exptl_absorpt_correction_type   multi-scan 
_exptl_absorpt_correction_T_min  0.7054 
_exptl_absorpt_correction_T_max  0.7467 
_exptl_absorpt_process_details 
; 
 SADABS 2016/2: Krause, L., Herbst-Irmer, R., Sheldrick G.M. & Stalke D., 
 J. Appl. Cryst. 48 (2015) 3-10 
; 
_exptl_absorpt_special_details    ? 
_diffrn_ambient_temperature       152(2) 
_diffrn_radiation_wavelength      0.71073 
_diffrn_radiation_type            MoK\a 
_diffrn_source                    ? 
_diffrn_measurement_device_type   'Bruker APEX-II CCD' 
_diffrn_measurement_method        '\f and \w scans' 
_diffrn_detector_area_resol_mean  ? 
_diffrn_reflns_number             98559 
_diffrn_reflns_av_unetI/netI      0.0295 
_diffrn_reflns_av_R_equivalents   0.0418 
_diffrn_reflns_limit_h_min        -32 
_diffrn_reflns_limit_h_max        32 
_diffrn_reflns_limit_k_min        -21 
_diffrn_reflns_limit_k_max        20 
_diffrn_reflns_limit_l_min        -38 
_diffrn_reflns_limit_l_max        38 
_diffrn_reflns_theta_min          1.815 
_diffrn_reflns_theta_max          34.321 
_diffrn_reflns_theta_full         25.242 
_diffrn_measured_fraction_theta_max   0.996 
_diffrn_measured_fraction_theta_full  1.000 
_diffrn_reflns_Laue_measured_fraction_max    0.996 
_diffrn_reflns_Laue_measured_fraction_full   1.000 
_diffrn_reflns_point_group_measured_fraction_max   0.996 
_diffrn_reflns_point_group_measured_fraction_full  1.000 
_reflns_number_total              12930 
_reflns_number_gt                 10410 
_reflns_threshold_expression      'I > 2\s(I)' 
_reflns_Friedel_coverage          0.000 
_reflns_Friedel_fraction_max      . 
_reflns_Friedel_fraction_full     . 
  
_reflns_special_details 
; 
 Reflections were merged by SHELXL according to the crystal 
 class for the calculation of statistics and refinement. 
  
 _reflns_Friedel_fraction is defined as the number of unique 
 Friedel pairs measured divided by the number that would be 
 possible theoretically, ignoring centric projections and 
 systematic absences. 
; 
  
_computing_data_collection        'Bruker APEX2' 
_computing_cell_refinement        'Bruker SAINT' 
_computing_data_reduction         'Bruker SAINT' 
_computing_structure_solution     'SHELXS-97 (Sheldrick 2008)' 
_computing_structure_refinement 'SHELXL-2018/3 (Sheldrick, 2018)' 
_computing_molecular_graphics     'Bruker SHELXTL' 
_computing_publication_material   'Bruker SHELXTL' 
_refine_special_details           ? 
_refine_ls_structure_factor_coef  Fsqd 
_refine_ls_matrix_type            full 
_refine_ls_weighting_scheme       calc 
_refine_ls_weighting_details 
'w=1/[\s^2^(Fo^2^)+(0.0391P)^2^+1.9092P] where P=(Fo^2^+2Fc^2^)/3' 
_atom_sites_solution_primary      ? 
_atom_sites_solution_secondary    ? 
_atom_sites_solution_hydrogens    difmap 
_refine_ls_hydrogen_treatment     refall 
_refine_ls_extinction_method      none 
_refine_ls_extinction_coef        . 
_refine_ls_number_reflns          12930 
_refine_ls_number_parameters      515 
_refine_ls_number_restraints      0 
_refine_ls_R_factor_all           0.0443 
_refine_ls_R_factor_gt            0.0297 
_refine_ls_wR_factor_ref          0.0763 
_refine_ls_wR_factor_gt           0.0712 
_refine_ls_goodness_of_fit_ref    1.030 
_refine_ls_restrained_S_all       1.030 
_refine_ls_shift/su_max           0.002 
_refine_ls_shift/su_mean          0.000 
  
loop_ 
 _atom_site_label 
 _atom_site_type_symbol 
 _atom_site_fract_x 
 _atom_site_fract_y 
 _atom_site_fract_z 
 _atom_site_U_iso_or_equiv 
 _atom_site_adp_type 
 _atom_site_occupancy 
 _atom_site_site_symmetry_order 
 _atom_site_calc_flag 
 _atom_site_refinement_flags_posn 
 _atom_site_refinement_flags_adp 
 _atom_site_refinement_flags_occupancy 
 _atom_site_disorder_assembly 
 _atom_site_disorder_group 
Ge Ge 0.53670(2) 0.47881(2) 0.29932(2) 0.01449(3) Uani 1 1 d . . . . . 
Si Si 0.57185(2) 0.61547(2) 0.36941(2) 0.01556(5) Uani 1 1 d . . . . . 
N N 0.70424(5) 0.59871(7) 0.34256(4) 0.02404(18) Uani 1 1 d . . . . . 
C1 C 0.52663(5) 0.34701(7) 0.33389(4) 0.01565(17) Uani 1 1 d . . . . . 
C2 C 0.47789(5) 0.33617(7) 0.36028(4) 0.01685(17) Uani 1 1 d . . . . . 
C3 C 0.47296(6) 0.24398(7) 0.38590(5) 0.02061(19) Uani 1 1 d . . . . . 
C4 C 0.51495(6) 0.16236(7) 0.38685(5) 0.0228(2) Uani 1 1 d . . . . . 
C5 C 0.56245(6) 0.17402(8) 0.36025(5) 0.0235(2) Uani 1 1 d . . . . . 
C6 C 0.56893(6) 0.26430(7) 0.33359(4) 0.01843(18) Uani 1 1 d . . . . . 
C7 C 0.43089(6) 0.42150(7) 0.36340(5) 0.01866(18) Uani 1 1 d . . . . . 
C8 C 0.45021(7) 0.45755(9) 0.42725(5) 0.0259(2) Uani 1 1 d . . . . . 
C9 C 0.35390(6) 0.39294(10) 0.33597(6) 0.0278(2) Uani 1 1 d . . . . . 
C10 C 0.50514(8) 0.06254(8) 0.41289(6) 0.0315(3) Uani 1 1 d . . . . . 
C11 C 0.45752(11) -0.00547(11) 0.36317(9) 0.0464(4) Uani 1 1 d . . . . . 
C12 C 0.57272(11) 0.00953(13) 0.44932(9) 0.0488(4) Uani 1 1 d . . . . . 
C13 C 0.62358(6) 0.27265(8) 0.30703(5) 0.0230(2) Uani 1 1 d . . . . . 
C14 C 0.62759(9) 0.17948(10) 0.27193(7) 0.0348(3) Uani 1 1 d . . . . . 
C15 C 0.69448(8) 0.29676(14) 0.35534(7) 0.0410(3) Uani 1 1 d . . . . . 
C16 C 0.61118(6) 0.71485(7) 0.33743(4) 0.01882(18) Uani 1 1 d . . . . . 
C17 C 0.67181(6) 0.69641(8) 0.32733(4) 0.02074(19) Uani 1 1 d . . . . . 
C18 C 0.69909(7) 0.77116(9) 0.30263(5) 0.0277(2) Uani 1 1 d . . . . . 
C19 C 0.66661(7) 0.86421(9) 0.28741(6) 0.0319(3) Uani 1 1 d . . . . . 
C20 C 0.60694(7) 0.88338(9) 0.29702(6) 0.0309(3) Uani 1 1 d . . . . . 
C21 C 0.57948(7) 0.80958(8) 0.32191(5) 0.0251(2) Uani 1 1 d . . . . . 
C22 C 0.71193(8) 0.54914(11) 0.29201(6) 0.0336(3) Uani 1 1 d . . . . . 
C23 C 0.77133(8) 0.60287(13) 0.39336(7) 0.0371(3) Uani 1 1 d . . . . . 
C24 C 0.49762(6) 0.67626(7) 0.38306(4) 0.01778(18) Uani 1 1 d . . . . . 
C25 C 0.43139(6) 0.68648(9) 0.33800(5) 0.0235(2) Uani 1 1 d . . . . . 
C26 C 0.37598(6) 0.72464(10) 0.34965(5) 0.0287(2) Uani 1 1 d . . . . . 
C27 C 0.38568(7) 0.75468(9) 0.40657(5) 0.0280(2) Uani 1 1 d . . . . . 
C28 C 0.45113(7) 0.74778(9) 0.45167(5) 0.0276(2) Uani 1 1 d . . . . . 
C29 C 0.50629(6) 0.70923(8) 0.43995(5) 0.0226(2) Uani 1 1 d . . . . . 
C30 C 0.63748(5) 0.57161(8) 0.44356(4) 0.01873(18) Uani 1 1 d . . . . . 
C31 C 0.67907(6) 0.64244(9) 0.48464(5) 0.0254(2) Uani 1 1 d . . . . . 
C32 C 0.72742(7) 0.61352(10) 0.54024(5) 0.0311(3) Uani 1 1 d . . . . . 
C33 C 0.73541(7) 0.51279(11) 0.55589(6) 0.0327(3) Uani 1 1 d . . . . . 
C34 C 0.69501(7) 0.44152(10) 0.51612(6) 0.0327(3) Uani 1 1 d . . . . . 
C35 C 0.64643(6) 0.47047(8) 0.46072(5) 0.0240(2) Uani 1 1 d . . . . . 
H1 H 0.4402(7) 0.2375(10) 0.4041(6) 0.025(3) Uiso 1 1 d . . . . . 
H2 H 0.5915(7) 0.1194(11) 0.3599(6) 0.028(4) Uiso 1 1 d . . . . . 
H3 H 0.4375(8) 0.4766(10) 0.3407(7) 0.022(4) Uiso 1 1 d . . . . . 
H4 H 0.4999(9) 0.4729(11) 0.4455(8) 0.035(4) Uiso 1 1 d . . . . . 
H5 H 0.4415(8) 0.4039(12) 0.4515(7) 0.033(4) Uiso 1 1 d . . . . . 
H6 H 0.4222(9) 0.5168(12) 0.4281(8) 0.040(5) Uiso 1 1 d . . . . . 
H7 H 0.3413(8) 0.3666(11) 0.2957(7) 0.032(4) Uiso 1 1 d . . . . . 
H8 H 0.3454(8) 0.3412(12) 0.3582(7) 0.035(4) Uiso 1 1 d . . . . . 
H9 H 0.3245(9) 0.4525(13) 0.3369(8) 0.042(4) Uiso 1 1 d . . . . . 
H10 H 0.4823(8) 0.0729(12) 0.4404(7) 0.037(4) Uiso 1 1 d . . . . . 
H11 H 0.4529(10) -0.0675(15) 0.3796(9) 0.056(5) Uiso 1 1 d . . . . . 
H12 H 0.4799(12) -0.0146(15) 0.3356(11) 0.066(7) Uiso 1 1 d . . . . . 
H13 H 0.4106(11) 0.0265(13) 0.3428(9) 0.050(5) Uiso 1 1 d . . . . . 
H14 H 0.6022(9) 0.0518(13) 0.4797(8) 0.040(4) Uiso 1 1 d . . . . . 
H15 H 0.5665(10) -0.0491(15) 0.4702(9) 0.056(5) Uiso 1 1 d . . . . . 
H16 H 0.5993(11) -0.0081(14) 0.4255(10) 0.053(6) Uiso 1 1 d . . . . . 
H17 H 0.6106(7) 0.3279(11) 0.2795(6) 0.028(4) Uiso 1 1 d . . . . . 
H18 H 0.5818(10) 0.1602(14) 0.2416(8) 0.053(5) Uiso 1 1 d . . . . . 
H19 H 0.6472(9) 0.1261(13) 0.2989(7) 0.039(4) Uiso 1 1 d . . . . . 
H20 H 0.6591(9) 0.1919(12) 0.2520(7) 0.040(4) Uiso 1 1 d . . . . . 
H21 H 0.7089(10) 0.2447(15) 0.3857(8) 0.053(5) Uiso 1 1 d . . . . . 
H22 H 0.7293(9) 0.2994(13) 0.3403(8) 0.045(5) Uiso 1 1 d . . . . . 
H23 H 0.6950(10) 0.3576(16) 0.3779(9) 0.059(6) Uiso 1 1 d . . . . . 
H24 H 0.7401(9) 0.7555(12) 0.2967(7) 0.036(4) Uiso 1 1 d . . . . . 
H25 H 0.6870(9) 0.9149(13) 0.2700(7) 0.041(4) Uiso 1 1 d . . . . . 
H26 H 0.5834(9) 0.9460(13) 0.2860(7) 0.037(4) Uiso 1 1 d . . . . . 
H27 H 0.5392(8) 0.8214(11) 0.3294(6) 0.027(4) Uiso 1 1 d . . . . . 
H28 H 0.7439(9) 0.5832(12) 0.2790(7) 0.036(4) Uiso 1 1 d . . . . . 
H29 H 0.7297(10) 0.4845(13) 0.3020(8) 0.044(5) Uiso 1 1 d . . . . . 
H30 H 0.6680(10) 0.5413(13) 0.2575(8) 0.042(5) Uiso 1 1 d . . . . . 
H31 H 0.7885(9) 0.5351(13) 0.4050(8) 0.040(5) Uiso 1 1 d . . . . . 
H32 H 0.7659(9) 0.6363(14) 0.4266(8) 0.050(5) Uiso 1 1 d . . . . . 
H33 H 0.8076(9) 0.6359(13) 0.3846(8) 0.045(5) Uiso 1 1 d . . . . . 
H34 H 0.4243(7) 0.6667(11) 0.3005(6) 0.025(4) Uiso 1 1 d . . . . . 
H35 H 0.3323(9) 0.7291(13) 0.3170(7) 0.042(4) Uiso 1 1 d . . . . . 
H36 H 0.3481(8) 0.7814(11) 0.4142(7) 0.032(4) Uiso 1 1 d . . . . . 
H37 H 0.4597(8) 0.7678(12) 0.4923(7) 0.037(4) Uiso 1 1 d . . . . . 
H38 H 0.5494(7) 0.7033(10) 0.4719(6) 0.022(3) Uiso 1 1 d . . . . . 
H39 H 0.6753(8) 0.7124(12) 0.4723(7) 0.037(4) Uiso 1 1 d . . . . . 
H40 H 0.7559(9) 0.6646(13) 0.5672(8) 0.046(5) Uiso 1 1 d . . . . . 
H41 H 0.7695(10) 0.4947(13) 0.5932(9) 0.047(5) Uiso 1 1 d . . . . . 
H42 H 0.7014(9) 0.3732(13) 0.5270(8) 0.045(5) Uiso 1 1 d . . . . . 
H43 H 0.6184(8) 0.4203(11) 0.4364(7) 0.028(4) Uiso 1 1 d . . . . . 
  
loop_ 
 _atom_site_aniso_label 
 _atom_site_aniso_U_11 
 _atom_site_aniso_U_22 
 _atom_site_aniso_U_33 
 _atom_site_aniso_U_23 
 _atom_site_aniso_U_13 
 _atom_site_aniso_U_12 
Ge 0.01641(5) 0.01385(5) 0.01285(5) 0.00010(3) 0.00531(4) -0.00148(3) 
Si 0.01688(13) 0.01516(11) 0.01411(11) -0.00035(8) 0.00548(10) -0.00234(9) 
N 0.0207(5) 0.0280(4) 0.0237(4) 0.0000(3) 0.0090(4) -0.0004(3) 
C1 0.0173(4) 0.0149(4) 0.0135(4) -0.0001(3) 0.0047(3) -0.0022(3) 
C2 0.0192(5) 0.0161(4) 0.0150(4) -0.0004(3) 0.0064(3) -0.0034(3) 
C3 0.0257(5) 0.0189(4) 0.0194(4) 0.0005(3) 0.0112(4) -0.0045(4) 
C4 0.0327(6) 0.0165(4) 0.0201(4) 0.0017(3) 0.0113(4) -0.0028(4) 
C5 0.0303(6) 0.0169(4) 0.0240(5) 0.0034(3) 0.0116(4) 0.0036(4) 
C6 0.0205(5) 0.0172(4) 0.0170(4) 0.0015(3) 0.0066(4) 0.0009(3) 
C7 0.0204(5) 0.0183(4) 0.0199(4) 0.0001(3) 0.0107(4) -0.0021(3) 
C8 0.0320(6) 0.0254(5) 0.0241(5) -0.0040(4) 0.0149(5) -0.0016(4) 
C9 0.0204(5) 0.0333(6) 0.0302(6) 0.0006(5) 0.0107(5) -0.0018(4) 
C10 0.0492(8) 0.0189(4) 0.0329(6) 0.0053(4) 0.0232(6) -0.0008(5) 
C11 0.0608(11) 0.0223(5) 0.0541(9) 0.0025(6) 0.0201(9) -0.0119(6) 
C12 0.0615(11) 0.0345(7) 0.0460(9) 0.0209(7) 0.0162(8) 0.0040(7) 
C13 0.0235(5) 0.0213(4) 0.0273(5) 0.0056(4) 0.0131(4) 0.0063(4) 
C14 0.0467(8) 0.0290(6) 0.0389(7) 0.0013(5) 0.0278(7) 0.0083(6) 
C15 0.0245(7) 0.0545(9) 0.0453(8) -0.0024(7) 0.0151(6) -0.0028(6) 
C16 0.0209(5) 0.0177(4) 0.0167(4) -0.0010(3) 0.0061(4) -0.0052(3) 
C17 0.0194(5) 0.0236(4) 0.0171(4) -0.0016(3) 0.0049(4) -0.0062(4) 
C18 0.0245(6) 0.0338(6) 0.0246(5) -0.0004(4) 0.0094(4) -0.0118(5) 
C19 0.0373(7) 0.0293(5) 0.0284(5) 0.0030(4) 0.0121(5) -0.0147(5) 
C20 0.0402(7) 0.0205(5) 0.0306(6) 0.0045(4) 0.0123(5) -0.0050(5) 
C21 0.0300(6) 0.0194(4) 0.0269(5) 0.0015(4) 0.0122(5) -0.0022(4) 
C22 0.0356(7) 0.0347(6) 0.0337(6) -0.0036(5) 0.0171(6) 0.0008(5) 
C23 0.0247(6) 0.0477(8) 0.0321(6) 0.0027(6) 0.0037(5) 0.0040(6) 
C24 0.0208(5) 0.0160(4) 0.0171(4) 0.0007(3) 0.0080(4) -0.0011(3) 
C25 0.0231(5) 0.0292(5) 0.0174(4) -0.0012(4) 0.0072(4) 0.0019(4) 
C26 0.0213(6) 0.0384(6) 0.0242(5) -0.0001(4) 0.0066(4) 0.0054(5) 
C27 0.0278(6) 0.0319(5) 0.0282(5) 0.0004(4) 0.0152(5) 0.0053(5) 
C28 0.0328(6) 0.0311(5) 0.0212(5) -0.0021(4) 0.0129(5) 0.0036(5) 
C29 0.0239(5) 0.0251(5) 0.0175(4) -0.0006(4) 0.0066(4) 0.0009(4) 
C30 0.0180(5) 0.0221(4) 0.0153(4) -0.0003(3) 0.0056(3) -0.0025(4) 
C31 0.0261(6) 0.0257(5) 0.0205(5) -0.0021(4) 0.0050(4) -0.0064(4) 
C32 0.0271(6) 0.0406(6) 0.0193(5) -0.0048(4) 0.0022(4) -0.0092(5) 
C33 0.0264(6) 0.0441(7) 0.0194(5) 0.0037(5) 0.0001(5) 0.0005(5) 
C34 0.0334(7) 0.0308(6) 0.0252(5) 0.0071(4) 0.0022(5) 0.0033(5) 
C35 0.0253(6) 0.0228(4) 0.0196(5) 0.0012(4) 0.0042(4) -0.0013(4) 
  
_geom_special_details 
; 
 All esds (except the esd in the dihedral angle between two l.s. planes) 
 are estimated using the full covariance matrix.  The cell esds are taken 
 into account individually in the estimation of esds in distances, angles 
 and torsion angles; correlations between esds in cell parameters are only 
 used when they are defined by crystal symmetry.  An approximate (isotropic) 
 treatment of cell esds is used for estimating esds involving l.s. planes. 
; 
  
loop_ 
 _geom_bond_atom_site_label_1 
 _geom_bond_atom_site_label_2 
 _geom_bond_distance 
 _geom_bond_site_symmetry_2 
 _geom_bond_publ_flag 
Ge C1 1.9876(9) . ? 
Ge Ge 2.2907(2) 2_655 ? 
Ge Si 2.4014(3) . ? 
Si C16 1.8753(10) . ? 
Si C30 1.8827(10) . ? 
Si C24 1.8850(11) . ? 
N C17 1.4417(14) . ? 
N C22 1.4599(17) . ? 
N C23 1.4620(17) . ? 
C1 C2 1.4053(14) . ? 
C1 C6 1.4091(14) . ? 
C2 C3 1.3954(13) . ? 
C2 C7 1.5178(14) . ? 
C3 C4 1.3865(15) . ? 
C3 H1 0.952(14) . ? 
C4 C5 1.3873(17) . ? 
C4 C10 1.5167(15) . ? 
C5 C6 1.3943(14) . ? 
C5 H2 0.947(14) . ? 
C6 C13 1.5174(16) . ? 
C7 C9 1.5243(16) . ? 
C7 C8 1.5248(15) . ? 
C7 H3 0.958(14) . ? 
C8 H4 0.976(18) . ? 
C8 H5 0.987(16) . ? 
C8 H6 0.984(17) . ? 
C9 H7 0.976(15) . ? 
C9 H8 0.933(16) . ? 
C9 H9 1.006(18) . ? 
C10 C12 1.513(2) . ? 
C10 C11 1.526(2) . ? 
C10 H10 0.972(16) . ? 
C11 H11 0.94(2) . ? 
C11 H12 0.96(2) . ? 
C11 H13 1.00(2) . ? 
C12 H14 0.941(18) . ? 
C12 H15 0.97(2) . ? 
C12 H16 0.97(2) . ? 
C13 C15 1.5203(19) . ? 
C13 C14 1.5243(17) . ? 
C13 H17 0.959(15) . ? 
C14 H18 0.986(19) . ? 
C14 H19 0.943(17) . ? 
C14 H20 0.972(17) . ? 
C15 H21 0.971(19) . ? 
C15 H22 0.931(18) . ? 
C15 H23 0.97(2) . ? 
C16 C17 1.3991(16) . ? 
C16 C21 1.4013(15) . ? 
C17 C18 1.3915(15) . ? 
C18 C19 1.3869(19) . ? 
C18 H24 0.943(16) . ? 
C19 C20 1.375(2) . ? 
C19 H25 0.977(17) . ? 
C20 C21 1.3874(16) . ? 
C20 H26 0.949(17) . ? 
C21 H27 0.939(15) . ? 
C22 H28 0.957(17) . ? 
C22 H29 0.928(17) . ? 
C22 H30 0.976(19) . ? 
C23 H31 0.969(17) . ? 
C23 H32 0.968(19) . ? 
C23 H33 0.967(18) . ? 
C24 C25 1.3941(15) . ? 
C24 C29 1.3972(14) . ? 
C25 C26 1.3874(17) . ? 
C25 H34 0.907(14) . ? 
C26 C27 1.3806(17) . ? 
C26 H35 0.949(17) . ? 
C27 C28 1.3800(18) . ? 
C27 H36 0.943(16) . ? 
C28 C29 1.3854(17) . ? 
C28 H37 0.973(16) . ? 
C29 H38 0.933(14) . ? 
C30 C35 1.3963(15) . ? 
C30 C31 1.3996(14) . ? 
C31 C32 1.3901(16) . ? 
C31 H39 0.969(16) . ? 
C32 C33 1.3820(19) . ? 
C32 H40 0.969(18) . ? 
C33 C34 1.3802(19) . ? 
C33 H41 0.94(2) . ? 
C34 C35 1.3884(16) . ? 
C34 H42 0.940(17) . ? 
C35 H43 0.930(15) . ? 
  
loop_ 
 _geom_angle_atom_site_label_1 
 _geom_angle_atom_site_label_2 
 _geom_angle_atom_site_label_3 
 _geom_angle 
 _geom_angle_site_symmetry_1 
 _geom_angle_site_symmetry_3 
 _geom_angle_publ_flag 
C1 Ge Ge 107.91(3) . 2_655 ? 
C1 Ge Si 114.58(3) . . ? 
Ge Ge Si 129.789(7) 2_655 . ? 
C16 Si C30 110.21(5) . . ? 
C16 Si C24 107.10(5) . . ? 
C30 Si C24 107.50(5) . . ? 
C16 Si Ge 107.24(3) . . ? 
C30 Si Ge 110.80(3) . . ? 
C24 Si Ge 113.93(3) . . ? 
C17 N C22 112.49(10) . . ? 
C17 N C23 112.38(10) . . ? 
C22 N C23 110.40(11) . . ? 
C2 C1 C6 119.17(9) . . ? 
C2 C1 Ge 119.93(7) . . ? 
C6 C1 Ge 120.88(7) . . ? 
C3 C2 C1 119.16(9) . . ? 
C3 C2 C7 118.02(9) . . ? 
C1 C2 C7 122.81(8) . . ? 
C4 C3 C2 122.41(10) . . ? 
C4 C3 H1 118.9(8) . . ? 
C2 C3 H1 118.7(8) . . ? 
C3 C4 C5 117.74(9) . . ? 
C3 C4 C10 120.13(11) . . ? 
C5 C4 C10 122.02(10) . . ? 
C4 C5 C6 122.02(10) . . ? 
C4 C5 H2 119.7(9) . . ? 
C6 C5 H2 118.3(9) . . ? 
C5 C6 C1 119.49(10) . . ? 
C5 C6 C13 119.14(9) . . ? 
C1 C6 C13 121.33(9) . . ? 
C2 C7 C9 112.39(9) . . ? 
C2 C7 C8 111.53(9) . . ? 
C9 C7 C8 109.81(10) . . ? 
C2 C7 H3 107.4(9) . . ? 
C9 C7 H3 107.5(9) . . ? 
C8 C7 H3 108.0(9) . . ? 
C7 C8 H4 110.0(10) . . ? 
C7 C8 H5 110.4(9) . . ? 
H4 C8 H5 106.7(13) . . ? 
C7 C8 H6 110.5(10) . . ? 
H4 C8 H6 110.9(14) . . ? 
H5 C8 H6 108.3(13) . . ? 
C7 C9 H7 110.7(9) . . ? 
C7 C9 H8 109.5(10) . . ? 
H7 C9 H8 106.4(13) . . ? 
C7 C9 H9 109.9(10) . . ? 
H7 C9 H9 112.3(13) . . ? 
H8 C9 H9 107.9(13) . . ? 
C12 C10 C4 113.91(12) . . ? 
C12 C10 C11 111.01(13) . . ? 
C4 C10 C11 109.63(11) . . ? 
C12 C10 H10 104.8(10) . . ? 
C4 C10 H10 110.3(10) . . ? 
C11 C10 H10 106.9(10) . . ? 
C10 C11 H11 108.9(12) . . ? 
C10 C11 H12 106.7(14) . . ? 
H11 C11 H12 110.3(16) . . ? 
C10 C11 H13 110.4(11) . . ? 
H11 C11 H13 109.9(16) . . ? 
H12 C11 H13 110.6(18) . . ? 
C10 C12 H14 110.9(11) . . ? 
C10 C12 H15 113.5(12) . . ? 
H14 C12 H15 104.3(16) . . ? 
C10 C12 H16 112.1(12) . . ? 
H14 C12 H16 105.2(16) . . ? 
H15 C12 H16 110.2(16) . . ? 
C6 C13 C15 110.38(10) . . ? 
C6 C13 C14 113.26(10) . . ? 
C15 C13 C14 110.85(11) . . ? 
C6 C13 H17 107.5(9) . . ? 
C15 C13 H17 107.7(9) . . ? 
C14 C13 H17 106.8(9) . . ? 
C13 C14 H18 112.5(11) . . ? 
C13 C14 H19 108.8(10) . . ? 
H18 C14 H19 110.9(15) . . ? 
C13 C14 H20 109.9(10) . . ? 
H18 C14 H20 108.3(14) . . ? 
H19 C14 H20 106.3(14) . . ? 
C13 C15 H21 111.0(11) . . ? 
C13 C15 H22 111.9(11) . . ? 
H21 C15 H22 105.7(15) . . ? 
C13 C15 H23 113.9(11) . . ? 
H21 C15 H23 103.0(15) . . ? 
H22 C15 H23 110.6(16) . . ? 
C17 C16 C21 118.15(10) . . ? 
C17 C16 Si 121.39(8) . . ? 
C21 C16 Si 120.45(9) . . ? 
C18 C17 C16 120.03(11) . . ? 
C18 C17 N 121.54(11) . . ? 
C16 C17 N 118.43(9) . . ? 
C19 C18 C17 120.76(12) . . ? 
C19 C18 H24 122.1(10) . . ? 
C17 C18 H24 117.1(10) . . ? 
C20 C19 C18 119.86(11) . . ? 
C20 C19 H25 121.4(10) . . ? 
C18 C19 H25 118.7(10) . . ? 
C19 C20 C21 119.88(12) . . ? 
C19 C20 H26 121.0(10) . . ? 
C21 C20 H26 119.1(10) . . ? 
C20 C21 C16 121.33(12) . . ? 
C20 C21 H27 121.3(9) . . ? 
C16 C21 H27 117.3(9) . . ? 
N C22 H28 112.8(10) . . ? 
N C22 H29 111.0(12) . . ? 
H28 C22 H29 105.5(15) . . ? 
N C22 H30 113.6(10) . . ? 
H28 C22 H30 107.7(14) . . ? 
H29 C22 H30 105.7(15) . . ? 
N C23 H31 109.6(10) . . ? 
N C23 H32 109.9(11) . . ? 
H31 C23 H32 109.4(15) . . ? 
N C23 H33 113.6(10) . . ? 
H31 C23 H33 104.7(14) . . ? 
H32 C23 H33 109.5(15) . . ? 
C25 C24 C29 117.15(10) . . ? 
C25 C24 Si 121.98(8) . . ? 
C29 C24 Si 120.82(8) . . ? 
C26 C25 C24 121.33(10) . . ? 
C26 C25 H34 119.5(9) . . ? 
C24 C25 H34 119.2(9) . . ? 
C27 C26 C25 120.28(11) . . ? 
C27 C26 H35 122.8(10) . . ? 
C25 C26 H35 116.9(10) . . ? 
C28 C27 C26 119.54(12) . . ? 
C28 C27 H36 120.4(9) . . ? 
C26 C27 H36 120.1(9) . . ? 
C27 C28 C29 120.03(11) . . ? 
C27 C28 H37 121.7(10) . . ? 
C29 C28 H37 118.3(10) . . ? 
C28 C29 C24 121.62(10) . . ? 
C28 C29 H38 117.6(8) . . ? 
C24 C29 H38 120.7(8) . . ? 
C35 C30 C31 117.26(9) . . ? 
C35 C30 Si 123.14(8) . . ? 
C31 C30 Si 119.59(8) . . ? 
C32 C31 C30 121.50(11) . . ? 
C32 C31 H39 120.5(10) . . ? 
C30 C31 H39 118.0(9) . . ? 
C33 C32 C31 119.96(11) . . ? 
C33 C32 H40 120.9(10) . . ? 
C31 C32 H40 119.2(10) . . ? 
C34 C33 C32 119.61(11) . . ? 
C34 C33 H41 121.8(11) . . ? 
C32 C33 H41 118.5(11) . . ? 
C33 C34 C35 120.42(12) . . ? 
C33 C34 H42 118.9(11) . . ? 
C35 C34 H42 120.7(11) . . ? 
C34 C35 C30 121.25(11) . . ? 
C34 C35 H43 117.4(9) . . ? 
C30 C35 H43 121.3(9) . . ? 
  
_refine_diff_density_max    0.475 
_refine_diff_density_min   -0.235 
_refine_diff_density_rms    0.060 
  
_shelx_res_file 
; 
TITL sh4147_a.res in C2/c 
    sh4147.res 
    created by SHELXL-2018/3 at 16:23:43 on 15-Jul-2019 
CELL  0.71073  20.8248  13.2686  24.3799   90.000  112.992   90.000 
ZERR    4.000   0.0006   0.0006   0.0009    0.000    0.003    0.000 
LATT 7 
SYMM -X, Y, 1/2-Z 
SFAC C  H  N  Si Ge 
UNIT 280 344 8 8 8 
L.S. 10 
BOND $H 
FMAP 2 
PLAN -5 
ACTA 
SIZE 0.18 0.253 0.27 
TEMP -120.500 
WGHT    0.039100    1.909200 
FVAR       0.15733 
GE    5    0.536698    0.478807    0.299317    11.00000    0.01641    0.01385 = 
         0.01285    0.00010    0.00531   -0.00148 
SI    4    0.571852    0.615466    0.369408    11.00000    0.01688    0.01516 = 
         0.01411   -0.00035    0.00548   -0.00234 
N     3    0.704239    0.598710    0.342555    11.00000    0.02067    0.02800 = 
         0.02371    0.00001    0.00897   -0.00039 
C1    1    0.526625    0.347012    0.333892    11.00000    0.01726    0.01493 = 
         0.01354   -0.00015    0.00470   -0.00219 
C2    1    0.477886    0.336169    0.360277    11.00000    0.01920    0.01610 = 
         0.01497   -0.00041    0.00636   -0.00336 
C3    1    0.472955    0.243981    0.385903    11.00000    0.02573    0.01886 = 
         0.01945    0.00051    0.01123   -0.00453 
C4    1    0.514948    0.162360    0.386852    11.00000    0.03267    0.01653 = 
         0.02010    0.00165    0.01135   -0.00276 
C5    1    0.562453    0.174016    0.360248    11.00000    0.03033    0.01688 = 
         0.02403    0.00342    0.01157    0.00361 
C6    1    0.568926    0.264296    0.333588    11.00000    0.02048    0.01717 = 
         0.01702    0.00152    0.00664    0.00094 
C7    1    0.430886    0.421497    0.363398    11.00000    0.02038    0.01828 = 
         0.01991    0.00007    0.01066   -0.00214 
C8    1    0.450208    0.457546    0.427253    11.00000    0.03199    0.02536 = 
         0.02411   -0.00400    0.01489   -0.00157 
C9    1    0.353903    0.392937    0.335967    11.00000    0.02045    0.03332 = 
         0.03024    0.00060    0.01070   -0.00185 
C10   1    0.505138    0.062535    0.412888    11.00000    0.04922    0.01888 = 
         0.03292    0.00535    0.02320   -0.00080 
C11   1    0.457525   -0.005466    0.363165    11.00000    0.06076    0.02228 = 
         0.05413    0.00248    0.02009   -0.01195 
C12   1    0.572724    0.009534    0.449322    11.00000    0.06145    0.03448 = 
         0.04602    0.02094    0.01623    0.00403 
C13   1    0.623577    0.272652    0.307031    11.00000    0.02349    0.02127 = 
         0.02725    0.00563    0.01306    0.00628 
C14   1    0.627587    0.179477    0.271933    11.00000    0.04674    0.02897 = 
         0.03888    0.00127    0.02785    0.00828 
C15   1    0.694482    0.296755    0.355342    11.00000    0.02453    0.05452 = 
         0.04528   -0.00236    0.01507   -0.00279 
C16   1    0.611184    0.714852    0.337425    11.00000    0.02091    0.01775 = 
         0.01670   -0.00102    0.00614   -0.00518 
C17   1    0.671813    0.696410    0.327328    11.00000    0.01943    0.02361 = 
         0.01714   -0.00159    0.00493   -0.00625 
C18   1    0.699092    0.771161    0.302631    11.00000    0.02450    0.03382 = 
         0.02457   -0.00038    0.00943   -0.01184 
C19   1    0.666606    0.864211    0.287409    11.00000    0.03733    0.02927 = 
         0.02837    0.00298    0.01210   -0.01465 
C20   1    0.606941    0.883380    0.297023    11.00000    0.04023    0.02048 = 
         0.03057    0.00455    0.01231   -0.00498 
C21   1    0.579481    0.809582    0.321907    11.00000    0.03004    0.01937 = 
         0.02692    0.00151    0.01225   -0.00224 
C22   1    0.711931    0.549137    0.292007    11.00000    0.03561    0.03469 = 
         0.03366   -0.00355    0.01707    0.00075 
C23   1    0.771333    0.602872    0.393360    11.00000    0.02470    0.04767 = 
         0.03212    0.00273    0.00372    0.00398 
C24   1    0.497617    0.676258    0.383056    11.00000    0.02082    0.01596 = 
         0.01710    0.00068    0.00800   -0.00106 
C25   1    0.431393    0.686484    0.337996    11.00000    0.02313    0.02922 = 
         0.01744   -0.00116    0.00720    0.00191 
C26   1    0.375979    0.724645    0.349652    11.00000    0.02131    0.03840 = 
         0.02419   -0.00011    0.00657    0.00537 
C27   1    0.385683    0.754677    0.406567    11.00000    0.02777    0.03193 = 
         0.02817    0.00039    0.01520    0.00527 
C28   1    0.451134    0.747779    0.451673    11.00000    0.03284    0.03113 = 
         0.02115   -0.00212    0.01294    0.00362 
C29   1    0.506293    0.709232    0.439949    11.00000    0.02394    0.02508 = 
         0.01748   -0.00058    0.00659    0.00091 
C30   1    0.637483    0.571608    0.443556    11.00000    0.01799    0.02209 = 
         0.01533   -0.00026    0.00564   -0.00247 
C31   1    0.679072    0.642442    0.484636    11.00000    0.02607    0.02570 = 
         0.02050   -0.00208    0.00496   -0.00642 
C32   1    0.727419    0.613518    0.540241    11.00000    0.02711    0.04057 = 
         0.01927   -0.00476    0.00221   -0.00917 
C33   1    0.735415    0.512790    0.555890    11.00000    0.02642    0.04406 = 
         0.01940    0.00373    0.00006    0.00048 
C34   1    0.695010    0.441516    0.516122    11.00000    0.03338    0.03085 = 
         0.02524    0.00712    0.00223    0.00329 
C35   1    0.646430    0.470473    0.460725    11.00000    0.02534    0.02277 = 
         0.01955    0.00116    0.00417   -0.00133 
H1    2    0.440211    0.237494    0.404101    11.00000    0.02489 
H2    2    0.591534    0.119367    0.359856    11.00000    0.02761 
H3    2    0.437490    0.476591    0.340734    11.00000    0.02196 
H4    2    0.499939    0.472943    0.445531    11.00000    0.03483 
H5    2    0.441518    0.403913    0.451535    11.00000    0.03349 
H6    2    0.422156    0.516766    0.428086    11.00000    0.03958 
H7    2    0.341348    0.366560    0.295722    11.00000    0.03151 
H8    2    0.345355    0.341236    0.358194    11.00000    0.03462 
H9    2    0.324489    0.452536    0.336936    11.00000    0.04166 
H10   2    0.482285    0.072918    0.440404    11.00000    0.03744 
H11   2    0.452872   -0.067539    0.379583    11.00000    0.05630 
H12   2    0.479851   -0.014576    0.335632    11.00000    0.06613 
H13   2    0.410580    0.026486    0.342826    11.00000    0.05047 
H14   2    0.602248    0.051833    0.479689    11.00000    0.03979 
H15   2    0.566525   -0.049081    0.470174    11.00000    0.05579 
H16   2    0.599329   -0.008077    0.425494    11.00000    0.05336 
H17   2    0.610612    0.327917    0.279503    11.00000    0.02791 
H18   2    0.581756    0.160166    0.241635    11.00000    0.05277 
H19   2    0.647224    0.126110    0.298859    11.00000    0.03923 
H20   2    0.659145    0.191858    0.251967    11.00000    0.03957 
H21   2    0.708888    0.244729    0.385745    11.00000    0.05318 
H22   2    0.729261    0.299371    0.340324    11.00000    0.04500 
H23   2    0.695012    0.357562    0.377910    11.00000    0.05867 
H24   2    0.740073    0.755472    0.296698    11.00000    0.03575 
H25   2    0.686982    0.914941    0.270008    11.00000    0.04125 
H26   2    0.583434    0.946034    0.286009    11.00000    0.03699 
H27   2    0.539234    0.821374    0.329444    11.00000    0.02704 
H28   2    0.743942    0.583224    0.278974    11.00000    0.03589 
H29   2    0.729667    0.484474    0.301990    11.00000    0.04356 
H30   2    0.668017    0.541337    0.257540    11.00000    0.04243 
H31   2    0.788549    0.535076    0.404990    11.00000    0.04031 
H32   2    0.765885    0.636305    0.426584    11.00000    0.04955 
H33   2    0.807613    0.635943    0.384601    11.00000    0.04462 
H34   2    0.424304    0.666675    0.300460    11.00000    0.02550 
H35   2    0.332282    0.729142    0.316959    11.00000    0.04204 
H36   2    0.348067    0.781380    0.414239    11.00000    0.03239 
H37   2    0.459714    0.767764    0.492334    11.00000    0.03711 
H38   2    0.549373    0.703295    0.471850    11.00000    0.02208 
H39   2    0.675262    0.712366    0.472338    11.00000    0.03708 
H40   2    0.755896    0.664578    0.567237    11.00000    0.04617 
H41   2    0.769505    0.494710    0.593164    11.00000    0.04687 
H42   2    0.701368    0.373167    0.527026    11.00000    0.04533 
H43   2    0.618417    0.420318    0.436373    11.00000    0.02791 
HKLF 4 1 1.0000 -1.0000  0.0000 -1.0000 -1.0000  0.0000 -1.0000  0.0000 -1.0000 
  
  
  
  
REM  sh4147_a.res in C2/c 
REM wR2 = 0.076332, GooF = S = 1.02976, Restrained GooF = 1.02976 for all data 
REM R1 = 0.029707 for 10410 Fo > 4sig(Fo) and 0.044289 for all 12930 data 
REM 515 parameters refined using 0 restraints 
  
END 
  
WGHT      0.0391      1.9088 
  
REM Highest difference peak  0.475,  deepest hole -0.235,  1-sigma level  0.060 
Q1    1   0.6395  0.7022  0.3335  11.00000  0.05    0.48 
Q2    1   0.4091  0.7102  0.3500  11.00000  0.05    0.46 
Q3    1   0.6511  0.6149  0.4651  11.00000  0.05    0.44 
Q4    1   0.6418  0.5222  0.4504  11.00000  0.05    0.43 
Q5    1   0.4503  0.3812  0.3600  11.00000  0.05    0.43 
; 
_shelx_res_checksum   94289 
  
_shelx_hkl_file 
; 
  -1   0   0 119.738 3.65466   1 
   1   0   0 131.318 3.58740   2 
   1   0   0 135.665 3.69693   1 
   1   0   0 131.764 3.59025   2 
   1   0   0 127.502 3.67931   1 
  -2   0   0 1133.98 29.9876   1 
  -2   0   0 1162.86 30.0363   1 
  -2   0   0 1159.62 29.4634   6 
   2   0   0 1173.08 29.8494   2 
   2   0   0 1105.30 29.8147   2 
   2   0   0 1106.99 29.9724   1 
   2   0   0 1126.34 29.7163   7 
  -3   0   0 7.52014 1.15989   1 
  -3   0   0 8.22049 0.52751   6 
  -3   0   0 6.75461 1.01247   1 
  -3   0   0 7.88052 0.85590   4 
   3   0   0 9.47861 1.13361   1 
   3   0   0 7.98967 0.85118   2 
   3   0   0 8.76605 0.88601   7 
  -4   0   0 1500.54 38.8612   6 
  -4   0   0 1518.34 40.0925   1 
  -4   0   0 1496.02 39.4453   4 
   4   0   0 1520.62 39.5368   7 
   4   0   0 1493.98 39.7462   2 
   4   0   0 1462.65 39.9781   1 
   4   0   0 1504.68 39.7916   2 
  -5   0   0 547.354 15.6491   1 
  -5   0   0 538.349 14.0019   6 
  -5   0   0 528.723 14.7962   4 
   5   0   0 499.379 15.4041   1 
   5   0   0 534.993 15.2315   2 
   5   0   0 539.546 14.9605   7 
   5   0   0 541.861 15.2705   2 
  -6   0   0 274.847 8.44275   4 
  -6   0   0 279.023 9.36879   1 
   6   0   0 278.728 9.02024   2 
   6   0   0 296.391 9.37839   1 
   6   0   0 272.035 8.93301   2 
   6   0   0 265.789 8.60391   7 
  -7   0   0 22.7413 2.01465   4 
  -7   0   0 17.2018 2.48637   1 
   7   0   0 22.3886 2.45310   2 
   7   0   0 19.5567 2.56853   1 
   7   0   0 16.4933 1.93950   7 
   7   0   0 22.5182 2.30714   2 
  -8   0   0 37.2662 2.56579   4 
  -8   0   0 42.6177 3.94742   1 
   8   0   0 33.9669 3.07807   2 
   8   0   0 39.2134 3.46232   2 
   8   0   0 33.3381 3.38411   1 
   8   0   0 37.0924 2.96833   7 
  -9   0   0 364.734 11.4099   4 
  -9   0   0 374.588 13.1285   1 
   9   0   0 378.819 12.6164   2 
   9   0   0 369.637 12.6589   2 
   9   0   0 365.730 12.7719   1 
   9   0   0 370.595 12.0951   7 
 -10   0   0 69.4272 3.72712   4 
 -10   0   0 63.7919 5.31530   1 
  10   0   0 68.2291 4.89417   2 
  10   0   0 70.5472 4.63754   7 
  10   0   0 63.5448 5.24701   1 
  10   0   0 66.1265 5.08809   2 
 -11   0   0 194.142 9.45826   1 
  11   0   0 210.991 8.66038   7 
  11   0   0 196.075 8.98413   2 
 -12   0   0 -1.0762 2.73238   1 
  12   0   0 1.51513 2.73226   7 
 -13   0   0 3.56654 3.47337   1 
  13   0   0 5.11198 3.33214   7 
 -14   0   0 1.06800 3.81721   1 
  14   0   0 -1.7403 3.23773   7 
 -15   0   0 50.8394 6.84860   1 
  15   0   0 58.9967 6.21350   7 
 -16   0   0 6.66981 5.00305   1 
  16   0   0 15.0250 4.70430   7 
 -17   0   0 -0.2911 4.63841   1 
 -17   1   0 7.46227 4.99970   1 
  16  -1   0 9.94676 4.59945   7 
 -16   1   0 15.1813 5.33047   1 
  15  -1   0 8.05787 4.00707   7 
 -15   1   0 9.40459 4.62060   1 
  14  -1   0 28.3760 4.58310   7 
 -14   1   0 34.4931 5.49337   1 
  13  -1   0 129.094 7.61981   7 
 -13   1   0 135.835 8.55978   1 
  12  -1   0 -0.2529 2.51296   7 
 -12   1   0 3.71892 2.99398   1 
  11  -1   0 225.631 9.76321   1 
  11  -1   0 226.286 9.65668   2 
  11  -1   0 229.186 9.15234   7 
 -11   1   0 236.329 10.1558   1 
  10  -1   0 0.96670 1.79894   2 
  10  -1   0 2.01522 1.89413   2 
  10  -1   0 -0.9790 1.75737   7 
  10  -1   0 -0.7937 1.92381   1 
 -10   1   0 0.06525 2.20801   1 
 -10   1   0 1.41737 1.41855   4 
   9  -1   0 71.8055 4.45569   2 
   9  -1   0 68.2025 4.33307   2 
   9  -1   0 68.8830 4.61316   1 
   9  -1   0 71.9228 4.20789   7 
  -9   1   0 60.2830 4.86611   1 
  -9   1   0 69.4011 3.45032   4 
   8  -1   0 65.7079 4.15113   1 
   8  -1   0 64.4889 3.86913   2 
   8  -1   0 64.7629 3.87397   2 
   8  -1   0 62.5895 3.62967   7 
  -8   1   0 61.0674 3.03299   4 
  -8   1   0 65.0700 4.33174   1 
   7  -1   0 351.197 11.0458   2 
   7  -1   0 337.663 10.9420   2 
   7  -1   0 357.302 11.3470   1 
   7  -1   0 341.048 10.5912   7 
  -7   1   0 335.155 10.1309   4 
  -7   1   0 337.484 11.3657   1 
   6  -1   0 131.531 5.08625   2 
   6  -1   0 132.757 5.40484   1 
   6  -1   0 131.561 5.13699   2 
   6  -1   0 130.570 4.86872   7 
  -6   1   0 131.122 5.49146   1 
  -6   1   0 132.132 4.52128   4 
   5  -1   0 137.780 5.26039   1 
   5  -1   0 145.313 5.07393   2 
   5  -1   0 142.420 5.05059   2 
   5  -1   0 140.878 4.80331   7 
  -5   1   0 136.372 5.33850   1 
  -5   1   0 139.246 4.53871   4 
   4  -1   0 2774.97 72.6126   2 
   4  -1   0 2695.27 72.6121   2 
   4  -1   0 2839.85 72.8765   1 
   4  -1   0 2768.39 72.4032   7 
  -4   1   0 2808.24 72.9137   1 
  -4   1   0 2782.25 72.2033   4 
   3  -1   0 113.404 3.77151   2 
   3  -1   0 113.599 3.75896   2 
   3  -1   0 112.921 3.93622   1 
   3  -1   0 114.617 3.61857   7 
  -3   1   0 112.171 3.96941   1 
   2  -1   0 1851.51 49.9690   1 
   2  -1   0 1939.68 49.8831   2 
   2  -1   0 1929.35 49.8726   2 
  -2   1   0 1896.53 49.9992   1 
  -2   1   0 1960.95 50.0000   1 
   1  -1   0 0.44484 0.27385   1 
   1  -1   0 0.32094 0.27016   1 
  -1   1   0 0.36247 0.29790   5 
  -1   1   0 0.14558 0.26672   1 
  -1   1   0 -0.0016 0.23023   1 
   0  -1   0 3743.20 99.2384   1 
   0   1   0 3696.06 98.9324   1 
   0   1   0 4312.56 99.2418   2 
   0   1   0 3974.64 99.8858   1 
   0   1   0 3517.69 99.0235   5 
   0   1   0 3513.25 98.5984   2 
  -1  -1   0 8.06297 0.74684   1 
  -1  -1   0 8.05278 0.75391   1 
   1   1   0 8.51428 0.79159   1 
   1   1   0 9.18237 0.58351   7 
   1   1   0 9.34002 0.63419   2 
   1   1   0 8.02235 0.60199   2 
  -2  -1   0 939.815 25.2737   1 
  -2  -1   0 957.587 24.9949   6 
  -2  -1   0 940.966 25.2706   1 
  -2  -1   0 967.660 25.1080   4 
   2   1   0 941.411 25.0191   2 
   2   1   0 959.275 25.0472   2 
   2   1   0 948.434 24.8867   7 
   2   1   0 920.620 25.2400   1 
  -3  -1   0 309.904 8.68469   4 
  -3  -1   0 302.441 8.44412   6 
  -3  -1   0 303.160 9.00697   1 
   3   1   0 286.158 8.64225   2 
   3   1   0 305.709 8.50672   7 
   3   1   0 302.907 8.70580   2 
   3   1   0 294.948 8.92910   1 
  -4  -1   0 1083.86 30.0765   1 
  -4  -1   0 1128.79 29.2228   6 
  -4  -1   0 1109.83 29.5805   4 
   4   1   0 1105.24 29.7434   2 
   4   1   0 1118.45 30.0238   1 
   4   1   0 1112.74 29.4563   7 
   4   1   0 1074.39 29.6763   2 
  -5  -1   0 4.04268 0.82723   6 
  -5  -1   0 2.69103 1.31195   1 
  -5  -1   0 3.44353 1.13413   4 
   5   1   0 6.63291 1.26264   2 
   5   1   0 6.44117 1.27704   2 
   5   1   0 2.32031 1.02380   7 
   5   1   0 4.00896 1.31933   1 
  -6  -1   0 38.8417 1.87299   6 
  -6  -1   0 41.5885 2.50680   4 
  -6  -1   0 45.7734 3.58696   1 
   6   1   0 42.4096 2.84658   2 
   6   1   0 39.4795 2.76380   2 
   6   1   0 37.1316 3.01971   1 
   6   1   0 41.0599 2.57280   7 
  -7  -1   0 1.89978 1.16526   4 
  -7  -1   0 0.82892 1.68891   1 
  -7  -1   0 3.67298 0.77083   6 
   7   1   0 2.06288 1.29450   2 
   7   1   0 0.88742 1.22453   2 
   7   1   0 3.93848 1.44596   7 
   7   1   0 4.44316 1.59391   1 
  -8  -1   0 93.0719 5.47977   1 
  -8  -1   0 97.2131 3.03586   6 
   8   1   0 87.5998 4.89846   2 
   8   1   0 107.796 5.11016   2 
   8   1   0 93.1548 4.67893   7 
   8   1   0 93.6294 5.16848   1 
  -9  -1   0 161.469 7.63751   1 
   9   1   0 157.017 7.15144   2 
   9   1   0 156.163 7.02692   2 
   9   1   0 154.143 7.22154   1 
   9   1   0 153.598 6.67784   7 
 -10  -1   0 1.91092 2.44196   1 
  10   1   0 3.45297 2.22910   7 
  10   1   0 1.63566 1.97137   2 
  10   1   0 1.98532 2.63818   1 
  10   1   0 0.33509 2.00597   2 
 -11  -1   0 85.7727 6.74033   1 
  11   1   0 76.0384 5.51681   7 
  11   1   0 94.0880 6.28271   2 
 -12  -1   0 1.25802 2.94720   1 
  12   1   0 -0.3552 2.69838   7 
 -13  -1   0 15.9562 4.34968   1 
  13   1   0 13.5264 3.80577   7 
 -14  -1   0 10.7031 4.20244   1 
  14   1   0 -1.3306 3.46975   7 
 -15  -1   0 -9.0241 3.51060   1 
  15   1   0 1.03942 4.02746   7 
 -16  -1   0 2.61492 4.58933   1 
  16   1   0 -0.2067 4.27962   7 
  17  -2   0 1.68652 7.32808   7 
 -17   2   0 8.21080 5.05794   1 
  16  -2   0 6.56260 4.37924   7 
 -16   2   0 6.06460 4.53787   1 
  15  -2   0 34.6514 4.98855   7 
 -15   2   0 27.4085 5.50103   1 
  14  -2   0 18.6958 4.10221   7 
 -14   2   0 12.5281 4.34114   1 
  13  -2   0 195.289 9.07234   7 
 -13   2   0 190.827 9.98818   1 
  12  -2   0 5.66089 2.57616   7 
 -12   2   0 1.49399 2.85242   1 
  11  -2   0 159.982 7.68836   2 
  11  -2   0 151.137 7.75228   1 
  11  -2   0 150.619 7.04082   7 
 -11   2   0 155.836 8.06822   1 
  10  -2   0 99.2253 5.78430   1 
  10  -2   0 103.121 5.66065   2 
  10  -2   0 95.6183 5.41142   2 
  10  -2   0 97.7706 5.22028   7 
 -10   2   0 97.6685 4.25742   4 
 -10   2   0 104.832 6.17442   1 
   9  -2   0 174.914 7.17883   2 
   9  -2   0 163.309 7.35395   1 
   9  -2   0 177.097 6.84985   7 
   9  -2   0 177.948 7.25444   2 
  -9   2   0 181.904 7.77581   1 
  -9   2   0 163.279 5.94011   4 
   8  -2   0 565.201 17.3594   2 
   8  -2   0 574.780 16.9399   7 
   8  -2   0 563.940 17.3143   2 
   8  -2   0 602.047 17.7835   1 
  -8   2   0 590.601 16.3269   4 
  -8   2   0 564.396 17.7917   1 
   7  -2   0 449.271 13.6757   2 
   7  -2   0 461.387 13.3346   7 
   7  -2   0 452.191 13.6565   2 
   7  -2   0 430.584 13.8449   1 
  -7   2   0 438.998 12.7780   4 
  -7   2   0 453.214 14.1110   1 
   6  -2   0 212.343 7.37326   2 
   6  -2   0 218.472 7.64280   1 
   6  -2   0 229.655 7.44441   2 
  -6   2   0 210.337 7.62981   1 
  -6   2   0 217.029 6.73106   4 
   5  -2   0 145.919 4.85023   7 
   5  -2   0 140.187 5.04051   2 
   5  -2   0 140.712 3.93296   6 
   5  -2   0 134.114 5.00461   2 
   5  -2   0 137.277 5.29648   1 
  -5   2   0 140.540 5.34189   1 
  -5   2   0 141.721 4.59186   4 
   4  -2   0 2570.47 66.3709   6 
   4  -2   0 2573.69 67.1329   2 
   4  -2   0 2610.11 66.8913   7 
   4  -2   0 2531.26 67.3168   1 
   4  -2   0 2560.45 67.1230   2 
  -4   2   0 2519.60 67.3487   1 
   3  -2   0 430.630 12.2675   2 
   3  -2   0 456.439 12.5089   1 
   3  -2   0 449.686 12.1264   7 
   3  -2   0 439.532 12.3092   2 
  -3   2   0 425.403 12.4535   1 
   2  -2   0 103.027 3.48976   5 
   2  -2   0 101.549 3.50268   1 
  -2   2   0 102.326 3.51961   1 
   1  -2   0 1466.22 39.6157   5 
   1  -2   0 1508.62 39.6376   1 
   1  -2   0 1481.25 39.1241   3 
   1  -2   0 1507.65 39.6612   1 
  -1   2   0 1549.17 39.5287   2 
  -1   2   0 1548.77 39.5300   2 
  -1   2   0 1498.82 39.6423   5 
  -1   2   0 1531.48 39.6567   1 
   0  -2   0 45.6972 1.93897   1 
   0  -2   0 49.0741 2.01697   5 
   0   2   0 46.8933 1.67837   7 
   0   2   0 48.3990 1.69547   7 
   0   2   0 43.5097 1.74810   2 
   0   2   0 44.1339 1.77780   2 
   0   2   0 49.1453 2.00744   1 
  -1  -2   0 2155.11 57.1273   1 
  -1  -2   0 2120.96 57.1305   6 
   1   2   0 2244.90 56.8579   2 
   1   2   0 2153.28 56.7062   7 
   1   2   0 2228.00 56.8676   2 
   1   2   0 2218.60 57.1237   1 
   1   2   0 2160.51 57.2715   5 
  -2  -2   0 79.7663 3.29239   1 
  -2  -2   0 90.6923 3.64959   1 
  -2  -2   0 85.5958 3.21853   6 
   2   2   0 87.9907 3.08469   2 
   2   2   0 87.2116 3.06340   2 
   2   2   0 85.9423 2.90790   7 
   2   2   0 81.8468 3.29811   1 
  -3  -2   0 3.76344 0.91806   6 
  -3  -2   0 2.93225 0.99662   1 
   3   2   0 5.40099 1.18788   1 
   3   2   0 4.29064 0.81833   7 
   3   2   0 4.39104 0.88922   2 
   3   2   0 4.77245 0.86388   2 
  -4  -2   0 20.3829 1.70493   6 
  -4  -2   0 15.8752 1.94902   1 
   4   2   0 17.2689 1.60066   7 
   4   2   0 16.4022 1.72196   2 
   4   2   0 19.8145 2.08635   1 
   4   2   0 19.7163 1.84391   2 
  -5  -2   0 64.9172 3.73323   1 
  -5  -2   0 66.7160 3.76119   1 
  -5  -2   0 64.5704 2.90040   6 
   5   2   0 69.1677 3.62464   1 
   5   2   0 65.5558 3.31708   2 
   5   2   0 62.5559 3.28606   2 
   5   2   0 64.2152 3.08198   7 
  -6  -2   0 -0.2908 0.90344   6 
  -6  -2   0 1.03039 1.42854   1 
  -6  -2   0 0.06906 1.47836   1 
   6   2   0 1.61532 1.18770   7 
   6   2   0 3.22701 1.50076   1 
   6   2   0 1.45892 1.16680   2 
   6   2   0 1.77259 1.20458   2 
  -7  -2   0 338.832 9.95253   6 
  -7  -2   0 322.155 11.5651   1 
   7   2   0 347.472 11.1879   2 
   7   2   0 346.887 11.2951   2 
   7   2   0 322.549 10.6777   7 
   7   2   0 328.018 11.3387   1 
  -8  -2   0 105.051 5.82431   1 
  -8  -2   0 95.9258 3.72508   6 
   8   2   0 88.3696 5.29689   1 
   8   2   0 105.971 5.03542   7 
   8   2   0 92.9138 5.27681   2 
   8   2   0 96.8058 5.15373   2 
  -9  -2   0 314.741 12.1637   1 
   9   2   0 307.468 11.1478   7 
   9   2   0 332.936 11.9483   1 
   9   2   0 326.091 11.7809   2 
   9   2   0 333.646 11.7130   2 
 -10  -2   0 55.0958 5.42262   1 
  10   2   0 63.8571 5.43317   2 
  10   2   0 62.0483 4.77684   7 
 -11  -2   0 60.7070 6.09953   1 
  11   2   0 64.4735 5.28371   7 
 -12  -2   0 -1.0668 3.17299   1 
  12   2   0 1.60732 2.87592   7 
 -13  -2   0 0.87261 3.40021   1 
  13   2   0 0.46106 3.17371   7 
 -14  -2   0 4.34603 4.18396   1 
  14   2   0 3.82942 3.80230   7 
 -15  -2   0 18.6460 5.36544   1 
  15   2   0 25.4116 5.29934   7 
 -16  -2   0 5.51298 4.73699   1 
  16   2   0 2.69428 4.76508   7 
 -18   3   0 -5.1668 4.71231   1 
 -17   3   0 34.8025 6.59741   1 
  16  -3   0 0.91374 3.73855   7 
 -16   3   0 1.80647 4.18195   1 
  15  -3   0 83.1942 7.01977   7 
 -15   3   0 84.6126 8.15574   1 
  14  -3   0 17.8728 4.00619   7 
 -14   3   0 14.2012 4.25127   1 
  13  -3   0 330.236 12.3430   7 
 -13   3   0 313.863 13.4978   1 
  12  -3   0 26.1337 3.72785   7 
  12  -3   0 24.3005 4.01019   1 
 -12   3   0 18.2605 3.83575   1 
  11  -3   0 116.676 6.04916   7 
  11  -3   0 119.583 6.42057   2 
  11  -3   0 109.103 6.58929   1 
 -11   3   0 130.343 7.15636   1 
 -11   3   0 112.510 5.36528   4 
  10  -3   0 58.9712 4.38820   2 
  10  -3   0 62.0435 4.12083   7 
  10  -3   0 56.8701 4.29112   2 
  10  -3   0 68.1413 5.26012   1 
 -10   3   0 57.7916 3.20705   4 
 -10   3   0 69.8616 4.94138   1 
   9  -3   0 1044.83 29.8726   2 
   9  -3   0 1016.83 29.7667   2 
   9  -3   0 1087.63 30.2850   1 
   9  -3   0 1076.10 29.4371   7 
  -9   3   0 1015.20 28.4681   4 
  -9   3   0 1033.80 30.3718   1 
   8  -3   0 259.660 9.13412   2 
   8  -3   0 236.220 8.61810   7 
   8  -3   0 251.949 9.01509   2 
   8  -3   0 273.905 9.56854   1 
  -8   3   0 263.511 8.17294   4 
  -8   3   0 272.917 9.70864   1 
   7  -3   0 245.541 6.76028   6 
   7  -3   0 247.156 8.81783   1 
   7  -3   0 256.978 8.59243   2 
   7  -3   0 254.244 8.55508   2 
   7  -3   0 251.872 8.16327   7 
  -7   3   0 239.938 8.84191   1 
  -7   3   0 242.994 7.71567   4 
   6  -3   0 107.620 4.29486   7 
   6  -3   0 108.456 4.84885   1 
   6  -3   0 104.360 3.47423   6 
   6  -3   0 111.920 4.60836   2 
  -6   3   0 117.274 5.04134   1 
   5  -3   0 9.10216 1.30902   7 
   5  -3   0 9.41885 1.32043   2 
   5  -3   0 11.6321 1.07844   6 
   5  -3   0 7.50454 1.55136   1 
   5  -3   0 8.88317 1.39961   2 
  -5   3   0 9.80979 1.63377   1 
   4  -3   0 1526.45 40.9938   1 
   4  -3   0 1555.76 40.8151   2 
   4  -3   0 1547.81 40.5247   7 
   4  -3   0 1541.34 40.3692   6 
   4  -3   0 1534.78 40.7674   2 
  -4   3   0 1484.08 41.0187   1 
   3  -3   0 -0.7970 0.59306   7 
   3  -3   0 0.15211 0.78322   1 
   3  -3   0 1.17275 1.10923   2 
   3  -3   0 -0.3205 0.76763   5 
  -3   3   0 -0.3066 0.76946   1 
   2  -3   0 658.830 17.0969   3 
   2  -3   0 656.809 18.0429   5 
   2  -3   0 684.073 18.1286   1 
  -2   3   0 652.163 17.6639   7 
  -2   3   0 667.779 17.9108   2 
  -2   3   0 624.825 18.0411   1 
  -2   3   0 648.551 18.0551   5 
   1  -3   0 179.316 5.64994   1 
   1  -3   0 176.256 5.66943   5 
  -1   3   0 169.869 5.64637   1 
  -1   3   0 177.947 5.70885   5 
  -1   3   0 182.162 5.49590   2 
  -1   3   0 173.882 5.44963   2 
  -1   3   0 180.589 5.30635   7 
   0  -3   0 38.0950 2.09507   1 
   0  -3   0 41.5303 2.21348   5 
   0   3   0 39.7057 1.76577   7 
   0   3   0 42.3449 2.11573   1 
   0   3   0 42.0804 2.24274   5 
   0   3   0 42.1838 1.92492   2 
  -1  -3   0 1372.57 37.1850   6 
  -1  -3   0 1362.43 37.0858   1 
  -1  -3   0 1419.17 37.2927   5 
   1   3   0 1360.94 37.2768   5 
   1   3   0 1367.60 36.5606   7 
   1   3   0 1434.40 36.7812   2 
   1   3   0 1476.72 36.8429   2 
   1   3   0 1323.91 37.0352   1 
  -2  -3   0 568.739 15.7680   1 
  -2  -3   0 547.876 15.6333   6 
   2   3   0 569.080 15.3448   2 
   2   3   0 518.362 15.5643   1 
   2   3   0 527.655 15.2546   2 
   2   3   0 561.845 15.9775   5 
  -3  -3   0 4.41071 1.25117   6 
  -3  -3   0 5.54218 1.36023   1 
   3   3   0 9.50847 1.38565   2 
   3   3   0 4.68838 0.98613   2 
   3   3   0 6.53949 1.15928   7 
   3   3   0 6.15946 1.61907   5 
   3   3   0 4.94148 1.25824   1 
  -4  -3   0 85.4658 3.76822   6 
  -4  -3   0 87.8918 4.18834   1 
   4   3   0 79.5440 3.46259   7 
   4   3   0 88.4614 3.74957   2 
   4   3   0 80.6417 4.00640   1 
   4   3   0 78.4871 3.72172   2 
  -5  -3   0 75.1167 4.32249   1 
  -5  -3   0 85.4460 3.80907   6 
   5   3   0 84.8063 4.05483   2 
   5   3   0 78.1360 3.91298   2 
   5   3   0 84.4343 4.31545   1 
   5   3   0 84.0508 3.75786   7 
  -6  -3   0 29.2244 3.31205   1 
  -6  -3   0 29.8967 2.48915   6 
  -6  -3   0 26.1723 3.03115   1 
   6   3   0 23.1380 2.43400   7 
   6   3   0 24.9318 2.55498   2 
   6   3   0 26.5035 2.88906   1 
   6   3   0 23.9209 2.60619   2 
  -7  -3   0 72.3736 3.60785   6 
  -7  -3   0 82.7077 4.98432   1 
  -7  -3   0 72.4466 4.88573   1 
   7   3   0 72.1318 4.10802   7 
   7   3   0 74.5650 4.36008   2 
   7   3   0 68.3853 4.48380   1 
   7   3   0 71.2331 4.37858   2 
  -8  -3   0 3.07015 1.31220   6 
  -8  -3   0 2.57034 2.14270   1 
   8   3   0 1.28651 1.79278   7 
   8   3   0 1.94078 2.00758   1 
   8   3   0 0.84414 1.70054   2 
   8   3   0 0.10082 1.69760   2 
  -9  -3   0 174.462 8.31837   1 
   9   3   0 165.435 7.69950   2 
   9   3   0 164.105 7.88599   2 
   9   3   0 158.990 7.30608   7 
 -10  -3   0 5.05968 3.03247   1 
  10   3   0 4.89192 2.57908   7 
  10   3   0 7.00181 2.69663   2 
 -11  -3   0 1.76909 3.10214   1 
  11   3   0 -1.5773 2.63286   7 
 -12  -3   0 2.45477 3.54308   1 
  12   3   0 6.43668 3.45312   7 
 -13  -3   0 20.1176 4.90474   1 
  13   3   0 15.9092 4.19376   7 
 -14  -3   0 -5.9265 3.62807   1 
  14   3   0 -3.1249 3.68953   7 
 -15  -3   0 24.7348 5.94275   1 
  15   3   0 32.2870 5.98179   7 
 -18   4   0 -2.7739 4.47439   1 
 -17   4   0 89.1437 9.03600   1 
  16  -4   0 10.9752 4.16448   7 
 -16   4   0 0.08974 4.35217   1 
  15  -4   0 181.459 9.58140   7 
 -15   4   0 181.928 10.7303   1 
  14  -4   0 8.25277 3.29154   7 
 -14   4   0 6.44949 3.76406   1 
  13  -4   0 127.416 7.12859   7 
  13  -4   0 121.342 8.49055   1 
 -13   4   0 131.833 8.14818   1 
  12  -4   0 85.6912 6.64022   1 
  12  -4   0 93.4357 5.73388   7 
 -12   4   0 79.1407 6.74275   1 
  11  -4   0 135.418 6.43867   7 
  11  -4   0 133.748 6.93714   2 
  11  -4   0 127.115 7.14566   1 
 -11   4   0 133.995 5.35044   4 
 -11   4   0 143.201 7.55201   1 
  10  -4   0 15.9901 2.96762   1 
  10  -4   0 16.7721 2.61335   7 
  10  -4   0 12.0524 2.52419   2 
  10  -4   0 15.0933 2.60431   2 
 -10   4   0 13.4665 1.95625   4 
 -10   4   0 13.2245 2.88460   1 
   9  -4   0 492.120 15.4894   2 
   9  -4   0 502.940 15.6070   2 
   9  -4   0 489.714 15.9093   1 
   9  -4   0 489.805 15.0795   7 
  -9   4   0 483.862 14.2929   4 
  -9   4   0 473.568 15.8968   1 
   8  -4   0 97.4866 3.27563   6 
   8  -4   0 94.9100 4.74373   2 
   8  -4   0 97.0915 4.49005   7 
   8  -4   0 89.2381 4.71555   2 
   8  -4   0 99.4811 5.23464   1 
  -8   4   0 96.5403 4.06298   4 
  -8   4   0 106.664 5.46451   1 
   7  -4   0 1.65264 1.24520   2 
   7  -4   0 0.73083 1.21759   2 
   7  -4   0 -1.4696 1.33703   1 
   7  -4   0 0.06733 0.73501   6 
   7  -4   0 0.33079 1.03072   7 
  -7   4   0 2.02863 1.54091   1 
   6  -4   0 116.169 4.51809   7 
   6  -4   0 107.577 4.00898   6 
   6  -4   0 116.269 4.80678   2 
   6  -4   0 116.164 5.13308   1 
   6  -4   0 113.940 4.74610   2 
  -6   4   0 105.489 4.99488   1 
   5  -4   0 627.639 17.7501   6 
   5  -4   0 652.390 17.9295   7 
   5  -4   0 641.407 18.2218   2 
   5  -4   0 629.778 18.5170   1 
   5  -4   0 666.016 18.2827   2 
   5  -4   0 624.629 18.4441   5 
  -5   4   0 633.347 18.5528   1 
   4  -4   0 31.4559 1.93811   7 
   4  -4   0 27.0517 1.96645   6 
   4  -4   0 33.4993 2.44119   1 
   4  -4   0 31.5661 2.47881   5 
  -4   4   0 35.6055 2.75857   1 
   3  -4   0 158.522 5.63164   5 
   3  -4   0 159.723 5.69494   1 
  -3   4   0 163.598 5.21545   7 
  -3   4   0 155.898 5.65437   5 
  -3   4   0 169.154 5.81893   1 
   2  -4   0 122.449 3.52543   3 
   2  -4   0 119.630 4.64907   1 
   2  -4   0 130.194 4.67763   5 
  -2   4   0 120.042 4.61393   5 
  -2   4   0 128.578 4.46125   2 
  -2   4   0 125.099 4.66495   1 
  -2   4   0 126.222 4.20071   7 
  -2   4   0 130.834 4.47344   2 
   1  -4   0 14.0146 1.60526   5 
   1  -4   0 15.0869 1.63458   1 
  -1   4   0 15.0090 1.58467   1 
  -1   4   0 14.5306 1.26524   7 
  -1   4   0 15.5585 1.35492   2 
  -1   4   0 15.4391 1.40446   2 
  -1   4   0 15.6088 1.64508   5 
   0  -4   0 185.629 6.35951   5 
   0  -4   0 185.856 6.28554   1 
   0  -4   0 181.821 6.41912   6 
   0   4   0 181.281 5.94978   2 
   0   4   0 182.645 5.93530   2 
   0   4   0 177.817 6.34227   5 
   0   4   0 196.893 6.02216   2 
   0   4   0 184.562 5.72699   7 
   0   4   0 181.159 6.23238   1 
  -1  -4   0 210.985 7.13798   1 
  -1  -4   0 223.859 7.32374   6 
  -1  -4   0 208.247 7.25259   5 
   1   4   0 217.693 6.53594   7 
   1   4   0 200.766 6.70675   2 
   1   4   0 212.254 6.73161   2 
   1   4   0 218.074 7.36387   5 
   1   4   0 201.449 7.00859   1 
  -2  -4   0 226.396 7.96610   6 
  -2  -4   0 243.639 8.06002   1 
   2   4   0 230.007 7.85054   1 
   2   4   0 262.260 8.48106   5 
   2   4   0 232.491 7.52123   2 
   2   4   0 231.732 7.55212   2 
   2   4   0 228.835 7.28758   7 
  -3  -4   0 49.9828 3.09005   6 
  -3  -4   0 48.3131 3.21182   1 
   3   4   0 50.2450 2.60968   7 
   3   4   0 44.2394 2.69570   2 
   3   4   0 43.5643 2.93523   1 
   3   4   0 42.2556 2.67506   2 
   3   4   0 49.8436 3.37131   5 
  -4  -4   0 0.56225 1.39453   1 
  -4  -4   0 0.90297 1.12261   6 
   4   4   0 -0.4178 1.02456   7 
   4   4   0 0.67131 0.96380   2 
   4   4   0 0.50678 1.27688   1 
   4   4   0 0.59842 1.04218   2 
   4   4   0 -0.5079 1.46154   5 
  -5  -4   0 1.16627 1.54639   1 
  -5  -4   0 -0.2694 1.21917   6 
   5   4   0 0.95446 1.20695   2 
   5   4   0 0.24731 1.14461   7 
   5   4   0 1.16044 1.42110   1 
   5   4   0 1.75968 1.72777   5 
   5   4   0 0.79784 1.22914   2 
  -6  -4   0 15.6159 2.63987   1 
  -6  -4   0 22.1202 2.49120   6 
   6   4   0 23.3158 3.27415   5 
   6   4   0 21.9894 2.55278   7 
   6   4   0 19.7666 2.38730   2 
   6   4   0 16.8730 2.36236   2 
   6   4   0 16.6998 2.63581   1 
  -7  -4   0 11.5023 2.16129   6 
  -7  -4   0 14.1192 2.90872   1 
  -7  -4   0 8.68880 2.59476   1 
   7   4   0 15.7312 3.12821   5 
   7   4   0 13.3521 2.45621   2 
   7   4   0 14.8774 2.54979   2 
   7   4   0 12.3631 2.32291   7 
   7   4   0 20.0385 3.02201   1 
  -8  -4   0 54.4958 5.05418   1 
  -8  -4   0 65.0794 4.84316   6 
   8   4   0 64.7447 5.02853   2 
   8   4   0 62.4676 5.56803   5 
   8   4   0 59.3757 4.83981   2 
   8   4   0 47.1548 4.05191   7 
  -9  -4   0 44.8215 4.87141   1 
   9   4   0 45.1743 5.27355   5 
   9   4   0 37.6592 4.22410   2 
   9   4   0 47.0526 4.34503   7 
 -10  -4   0 1.34657 2.97314   1 
  10   4   0 0.87533 2.57325   7 
  10   4   0 1.10645 3.12464   5 
 -11  -4   0 19.7515 4.40947   1 
  11   4   0 19.7184 3.94052   7 
  11   4   0 20.1268 4.58043   5 
 -12  -4   0 28.9077 5.17997   1 
  12   4   0 22.3985 4.58739   7 
 -13  -4   0 2.98282 3.99629   1 
  13   4   0 -1.7263 3.69614   7 
 -14  -4   0 43.9529 6.72681   1 
  14   4   0 40.0856 6.12466   7 
 -18   5   0 -9.0089 4.79948   1 
 -17   5   0 84.3804 8.92341   1 
  16  -5   0 1.45985 3.68043   7 
 -16   5   0 2.75809 4.31013   1 
  15  -5   0 71.2316 6.40601   7 
 -15   5   0 75.7080 7.52626   1 
  14  -5   0 6.42027 3.14494   7 
 -14   5   0 6.81371 3.77824   1 
  13  -5   0 150.058 8.63764   1 
  13  -5   0 153.855 7.76829   7 
 -13   5   0 144.517 8.71762   1 
  12  -5   0 28.3106 3.78108   7 
  12  -5   0 33.3625 4.59692   1 
 -12   5   0 34.1972 4.90801   1 
  11  -5   0 68.4648 5.76794   1 
  11  -5   0 56.7034 4.55876   7 
 -11   5   0 57.5982 3.43258   4 
 -11   5   0 54.2063 5.26513   1 
  10  -5   0 96.3919 6.06585   1 
  10  -5   0 114.859 6.60453   2 
  10  -5   0 107.631 5.86678   2 
  10  -5   0 111.193 5.53439   7 
 -10   5   0 118.786 6.57408   1 
 -10   5   0 110.368 4.77687   4 
   9  -5   0 170.647 7.09141   2 
   9  -5   0 147.073 6.40426   7 
   9  -5   0 154.281 6.84720   2 
   9  -5   0 170.240 7.40785   1 
   9  -5   0 163.376 5.25716   6 
  -9   5   0 161.258 7.47921   1 
   8  -5   0 532.516 16.7077   2 
   8  -5   0 545.074 17.1766   1 
   8  -5   0 543.529 16.7529   2 
   8  -5   0 562.702 15.4836   6 
   8  -5   0 538.197 16.2688   7 
  -8   5   0 555.749 17.3660   1 
   7  -5   0 7.56523 1.73790   2 
   7  -5   0 10.9401 1.79512   7 
   7  -5   0 16.5313 2.43134   1 
   7  -5   0 11.6322 1.58086   6 
   7  -5   0 11.9112 1.88117   2 
  -7   5   0 8.30134 2.11866   1 
   6  -5   0 456.994 13.2427   6 
   6  -5   0 445.169 13.3266   7 
   6  -5   0 449.737 13.9948   5 
   6  -5   0 421.306 13.5777   2 
   6  -5   0 458.817 14.1390   1 
  -6   5   0 465.307 14.2196   1 
   5  -5   0 1.47693 1.10618   6 
   5  -5   0 0.33531 1.28443   5 
   5  -5   0 -0.7254 1.29308   1 
   5  -5   0 0.16877 1.03277   7 
  -5   5   0 0.16792 0.99937   7 
  -5   5   0 0.49215 1.34002   1 
   4  -5   0 471.377 13.9552   5 
   4  -5   0 461.209 13.7918   6 
   4  -5   0 475.783 13.3634   7 
   4  -5   0 445.920 13.9715   1 
  -4   5   0 466.849 13.9921   5 
  -4   5   0 458.866 13.3146   7 
  -4   5   0 463.644 14.0603   1 
   3  -5   0 16.8267 2.03145   1 
   3  -5   0 17.9149 1.95871   5 
   3  -5   0 18.2074 0.79239   3 
   3  -5   0 19.6356 2.08913   6 
  -3   5   0 21.5675 1.87321   2 
  -3   5   0 17.0448 2.00222   5 
  -3   5   0 18.0970 2.07683   1 
  -3   5   0 17.0723 1.62763   7 
   2  -5   0 207.549 7.27666   6 
   2  -5   0 209.344 7.13153   5 
   2  -5   0 203.938 7.09790   1 
  -2   5   0 213.142 6.88038   2 
  -2   5   0 210.489 6.85447   2 
  -2   5   0 202.586 7.13718   1 
  -2   5   0 202.694 7.12894   5 
  -2   5   0 200.672 6.52562   7 
   1  -5   0 12.8347 1.84638   6 
   1  -5   0 9.89027 1.66960   5 
   1  -5   0 12.5644 1.75357   1 
  -1   5   0 14.9454 1.54106   7 
  -1   5   0 9.89533 1.61509   1 
  -1   5   0 12.4171 1.44418   2 
  -1   5   0 13.3627 1.90695   5 
  -1   5   0 16.3666 1.71576   2 
   0  -5   0 409.852 12.4354   1 
   0  -5   0 410.481 12.6735   6 
   0  -5   0 400.098 12.4883   5 
   0   5   0 390.133 11.6680   7 
   0   5   0 398.998 11.9948   2 
   0   5   0 405.284 12.0607   2 
   0   5   0 412.145 12.3933   1 
   0   5   0 412.885 12.6206   5 
  -1  -5   0 261.879 8.98046   1 
  -1  -5   0 260.413 9.10620   6 
  -1  -5   0 271.396 9.20728   5 
   1   5   0 265.469 8.54126   2 
   1   5   0 267.067 8.26481   7 
   1   5   0 279.404 8.97962   1 
   1   5   0 269.525 8.56003   2 
   1   5   0 270.046 9.21065   5 
   1   5   0 261.224 8.23775   7 
  -2  -5   0 65.5131 3.83446   6 
  -2  -5   0 62.7785 3.74939   1 
   2   5   0 72.3976 4.05518   5 
   2   5   0 70.3070 3.44702   2 
   2   5   0 63.8627 3.63008   1 
   2   5   0 64.7639 3.32995   2 
   2   5   0 63.3895 3.14840   7 
  -3  -5   0 15.6853 2.22624   6 
  -3  -5   0 12.6656 2.18319   1 
   3   5   0 18.0334 2.55138   5 
   3   5   0 15.6413 1.89776   2 
   3   5   0 17.2388 1.98011   7 
   3   5   0 11.2383 1.71792   2 
   3   5   0 16.8358 2.29760   1 
  -4  -5   0 94.5590 4.69013   6 
  -4  -5   0 79.0096 4.72757   1 
   4   5   0 91.1237 4.41467   2 
   4   5   0 87.0418 4.40015   2 
   4   5   0 82.3194 4.06029   7 
   4   5   0 78.6411 4.93146   5 
   4   5   0 88.0344 4.61121   1 
  -5  -5   0 123.038 6.12549   1 
  -5  -5   0 117.381 5.60168   6 
   5   5   0 120.271 5.89891   1 
   5   5   0 118.032 5.29346   7 
   5   5   0 125.899 5.76630   2 
   5   5   0 121.894 6.40870   5 
   5   5   0 128.168 5.66858   2 
  -6  -5   0 0.16238 1.76114   6 
  -6  -5   0 3.69434 2.26727   1 
   6   5   0 3.68603 1.89362   2 
   6   5   0 2.68195 1.71028   7 
   6   5   0 2.03556 2.21170   5 
   6   5   0 4.22473 1.78452   2 
   6   5   0 0.97458 1.83766   1 
  -7  -5   0 23.3028 2.90577   6 
  -7  -5   0 21.6352 3.52129   1 
   7   5   0 22.2572 3.25352   2 
   7   5   0 21.3538 3.72337   5 
   7   5   0 18.8429 2.79409   7 
   7   5   0 24.8256 3.26591   2 
  -8  -5   0 1.02187 2.57007   1 
  -8  -5   0 -0.5045 2.35853   1 
   8   5   0 -0.7463 2.37914   5 
   8   5   0 -1.5394 1.80194   2 
   8   5   0 1.67311 2.13580   2 
   8   5   0 -1.9588 1.88728   7 
  -9  -5   0 14.4971 3.72148   1 
   9   5   0 19.9802 4.09650   2 
   9   5   0 18.4092 4.21389   5 
   9   5   0 13.8631 3.00519   7 
 -10  -5   0 11.4160 3.78359   1 
  10   5   0 11.2202 3.95920   5 
  10   5   0 15.1841 3.59765   7 
 -11  -5   0 20.6870 4.76563   1 
  11   5   0 13.4636 3.97060   7 
 -12  -5   0 26.5637 5.25392   1 
  12   5   0 21.7918 4.75101   7 
 -13  -5   0 65.4577 7.39714   1 
  13   5   0 66.0554 7.01647   7 
 -14  -5   0 40.8184 6.66543   1 
  14   5   0 33.6405 6.20958   7 
 -18   6   0 2.25579 5.40682   1 
 -17   6   0 103.536 9.85951   1 
 -16   6   0 9.87643 4.83949   1 
  15  -6   0 94.1355 7.20172   7 
 -15   6   0 91.5811 8.26136   1 
  14  -6   0 14.2044 4.47759   1 
  14  -6   0 4.98359 3.14039   7 
 -14   6   0 7.87879 3.92272   1 
  13  -6   0 152.718 8.65468   1 
  13  -6   0 171.141 8.25066   7 
 -13   6   0 187.734 9.75516   1 
  12  -6   0 33.5656 4.55765   1 
  12  -6   0 31.1786 3.78779   7 
 -12   6   0 31.3510 4.65860   1 
 -12   6   0 40.0994 4.00485   4 
  11  -6   0 31.2120 3.55194   7 
  11  -6   0 37.6723 4.61762   1 
 -11   6   0 35.7149 4.53811   1 
 -11   6   0 41.2478 3.39156   4 
  10  -6   0 112.550 4.41254   6 
  10  -6   0 126.143 6.83716   1 
  10  -6   0 123.811 5.85996   7 
  10  -6   0 115.837 6.58256   2 
 -10   6   0 114.418 6.82586   1 
   9  -6   0 0.84386 1.60200   2 
   9  -6   0 4.19415 2.30958   1 
   9  -6   0 1.50265 1.17233   6 
   9  -6   0 2.09713 1.56152   7 
   9  -6   0 0.12565 1.45559   2 
  -9   6   0 0.06101 1.99730   1 
   8  -6   0 335.581 10.4192   6 
   8  -6   0 330.551 11.7257   1 
   8  -6   0 343.096 11.3688   2 
   8  -6   0 317.327 10.7654   7 
  -8   6   0 330.391 11.8301   1 
   7  -6   0 16.5037 2.53593   1 
   7  -6   0 17.3703 2.34940   2 
   7  -6   0 15.1367 2.10314   7 
   7  -6   0 14.4516 1.99958   6 
  -7   6   0 16.7223 2.70545   1 
   6  -6   0 807.320 22.9501   7 
   6  -6   0 817.756 23.8716   1 
   6  -6   0 801.255 23.1897   6 
   6  -6   0 850.833 23.9363   5 
  -6   6   0 808.428 22.8179   7 
  -6   6   0 824.699 23.9588   1 
   5  -6   0 3.27739 1.22257   7 
   5  -6   0 4.88535 1.76029   1 
   5  -6   0 2.19087 1.27658   6 
   5  -6   0 6.07152 1.64978   5 
  -5   6   0 2.00706 1.16028   7 
  -5   6   0 1.56959 1.60322   1 
   4  -6   0 703.119 21.0386   5 
   4  -6   0 713.540 19.0259   3 
   4  -6   0 712.731 21.1640   1 
   4  -6   0 732.158 21.1601   6 
  -4   6   0 728.786 20.4036   7 
  -4   6   0 748.614 21.3140   1 
  -4   6   0 745.222 21.2456   5 
  -4   6   0 761.143 20.8912   2 
   3  -6   0 24.0249 2.62752   1 
   3  -6   0 24.5249 2.55209   5 
   3  -6   0 28.8758 2.76986   6 
  -3   6   0 23.9516 2.58072   5 
  -3   6   0 29.4567 2.38845   2 
  -3   6   0 30.3851 2.38425   7 
  -3   6   0 29.2006 2.47907   2 
  -3   6   0 32.8944 2.92288   1 
   2  -6   0 -0.3985 1.33485   6 
   2  -6   0 2.37417 1.41052   1 
   2  -6   0 7.46925 1.68023   5 
  -2   6   0 0.59342 1.00265   7 
  -2   6   0 1.94399 1.06801   2 
  -2   6   0 1.76686 1.11089   2 
  -2   6   0 -0.2972 1.30680   5 
  -2   6   0 0.30322 1.17811   1 
   1  -6   0 11.1976 2.09324   6 
   1  -6   0 9.18321 1.80181   5 
   1  -6   0 7.54427 1.70244   1 
  -1   6   0 9.32866 1.90451   5 
  -1   6   0 12.5700 2.08585   1 
  -1   6   0 8.88083 1.46648   2 
  -1   6   0 10.5256 1.54705   7 
  -1   6   0 11.1323 1.61067   2 
   0  -6   0 157.763 6.57412   5 
   0  -6   0 172.527 6.88249   6 
   0  -6   0 157.718 6.55596   1 
   0   6   0 163.226 6.49603   1 
   0   6   0 164.375 6.70322   5 
   0   6   0 170.583 6.24984   2 
   0   6   0 173.500 5.94424   7 
   0   6   0 182.242 6.30161   2 
  -1  -6   0 29.0128 2.91348   1 
  -1  -6   0 30.8482 3.13535   6 
  -1  -6   0 30.9215 3.20765   5 
   1   6   0 34.7125 2.58872   2 
   1   6   0 34.8559 3.26480   5 
   1   6   0 36.5487 3.13127   1 
   1   6   0 32.9586 2.56997   7 
   1   6   0 37.8016 2.78868   2 
   1   6   0 37.6279 2.68495   7 
  -2  -6   0 119.110 5.61591   1 
  -2  -6   0 107.991 5.51534   6 
   2   6   0 122.651 4.88854   7 
   2   6   0 117.043 5.38422   1 
   2   6   0 116.539 5.10219   2 
   2   6   0 125.171 6.01083   5 
   2   6   0 120.389 5.11830   2 
  -3  -6   0 4.90183 1.91818   1 
  -3  -6   0 6.13144 1.95408   6 
   3   6   0 3.43450 1.46650   7 
   3   6   0 4.05302 2.10119   5 
   3   6   0 5.17402 1.52509   2 
   3   6   0 5.02578 1.83570   1 
   3   6   0 7.02825 1.67872   2 
  -4  -6   0 73.7839 4.61593   6 
  -4  -6   0 75.4947 4.85309   1 
   4   6   0 78.6853 5.10862   5 
   4   6   0 65.2913 4.21967   2 
   4   6   0 66.8204 4.33666   1 
   4   6   0 68.6154 4.03768   7 
   4   6   0 77.6119 4.32840   2 
  -5  -6   0 145.994 7.33442   1 
  -5  -6   0 159.646 7.12132   6 
   5   6   0 160.945 7.85355   5 
   5   6   0 163.314 7.12451   2 
   5   6   0 164.630 7.21788   1 
   5   6   0 157.107 6.92147   2 
   5   6   0 164.746 6.71635   7 
  -6  -6   0 11.8885 3.06307   1 
  -6  -6   0 18.7367 3.03559   6 
   6   6   0 15.2877 2.63237   7 
   6   6   0 12.3448 3.30245   1 
   6   6   0 15.2192 2.77650   2 
   6   6   0 18.9676 2.90938   2 
   6   6   0 15.4146 3.43230   5 
  -7  -6   0 14.2227 3.35207   1 
  -7  -6   0 13.9697 2.68654   6 
   7   6   0 12.1430 2.77849   2 
   7   6   0 17.0590 2.87040   7 
   7   6   0 17.8799 3.16805   2 
   7   6   0 15.4037 3.53515   5 
  -8  -6   0 6.21302 3.18742   1 
  -8  -6   0 4.52960 2.91460   1 
   8   6   0 4.86031 3.10466   5 
   8   6   0 0.70618 2.21326   2 
   8   6   0 3.85299 2.60048   7 
  -9  -6   0 -2.9624 2.78914   1 
   9   6   0 -1.4717 2.61007   7 
   9   6   0 -4.1022 2.75768   5 
 -10  -6   0 27.5323 4.84077   1 
  10   6   0 22.2403 4.39033   7 
 -11  -6   0 -0.8538 3.59096   1 
  11   6   0 7.38919 3.87958   7 
 -12  -6   0 82.4039 8.09665   1 
  12   6   0 81.5853 7.36152   7 
 -13  -6   0 9.19184 4.91293   1 
  13   6   0 17.5204 5.17575   7 
 -19   7   0 57.1943 8.59106   1 
 -18   7   0 3.02176 5.23075   1 
 -17   7   0 173.341 11.7650   1 
 -16   7   0 8.32095 4.49948   1 
  15  -7   0 146.421 9.84919   7 
 -15   7   0 143.220 9.49983   1 
  14  -7   0 19.2820 3.88604   7 
  14  -7   0 15.0586 4.15131   1 
 -14   7   0 17.5064 4.78238   1 
  13  -7   0 85.7832 7.36232   1 
  13  -7   0 93.0022 6.10807   7 
 -13   7   0 75.9925 6.97422   1 
  12  -7   0 3.24368 2.48002   7 
  12  -7   0 3.05930 2.95089   1 
 -12   7   0 1.87585 2.86020   1 
 -12   7   0 1.35855 1.81802   4 
  11  -7   0 109.211 6.79578   1 
  11  -7   0 117.837 6.15876   7 
 -11   7   0 121.127 7.15918   1 
  10  -7   0 91.2677 6.17970   1 
  10  -7   0 102.773 4.56384   6 
  10  -7   0 107.661 5.46627   7 
 -10   7   0 90.7775 6.26047   1 
   9  -7   0 133.392 7.61061   2 
   9  -7   0 135.964 6.06357   7 
   9  -7   0 132.761 5.63359   6 
   9  -7   0 147.265 7.28915   1 
  -9   7   0 134.281 7.00268   1 
   8  -7   0 495.144 16.6420   1 
   8  -7   0 508.153 15.5438   7 
   8  -7   0 500.759 15.4572   6 
  -8   7   0 534.235 16.8763   1 
   7  -7   0 -1.5002 1.32021   6 
   7  -7   0 -2.0198 1.68476   1 
   7  -7   0 -0.4950 1.25671   7 
  -7   7   0 0.11804 1.09436   7 
  -7   7   0 0.49512 1.79530   1 
   6  -7   0 48.5227 3.43012   6 
   6  -7   0 63.9731 4.74485   1 
   6  -7   0 62.8175 3.45087   7 
  -6   7   0 59.5719 4.33110   1 
  -6   7   0 61.2532 3.38342   7 
   5  -7   0 80.9993 3.92230   7 
   5  -7   0 82.9100 4.81178   1 
   5  -7   0 85.2567 4.62414   6 
  -5   7   0 82.9375 4.65288   5 
  -5   7   0 92.9204 4.08950   7 
  -5   7   0 91.5118 4.93270   1 
   4  -7   0 3.34149 1.53961   5 
   4  -7   0 3.38892 1.52733   6 
   4  -7   0 1.67879 1.60366   1 
  -4   7   0 0.58134 1.47780   5 
  -4   7   0 2.64692 1.17663   7 
  -4   7   0 1.40877 1.19799   2 
  -4   7   0 0.78601 1.48815   1 
   3  -7   0 148.347 6.20909   5 
   3  -7   0 149.638 6.45503   6 
   3  -7   0 145.259 6.34567   1 
  -3   7   0 154.332 6.35363   1 
  -3   7   0 149.948 6.33451   5 
  -3   7   0 145.207 5.91144   2 
  -3   7   0 150.861 5.92893   2 
  -3   7   0 144.243 5.52496   7 
   2  -7   0 134.413 5.88092   5 
   2  -7   0 138.117 5.99168   1 
   2  -7   0 124.202 6.01518   6 
  -2   7   0 154.112 5.75905   2 
  -2   7   0 124.955 5.45794   2 
  -2   7   0 128.748 5.92108   5 
  -2   7   0 134.294 5.85788   1 
  -2   7   0 143.834 5.30678   7 
   1  -7   0 400.653 12.6544   1 
   1  -7   0 382.346 12.8621   6 
  -1   7   0 381.056 11.6875   7 
  -1   7   0 391.607 12.5233   1 
  -1   7   0 366.532 11.9899   2 
  -1   7   0 381.797 12.1427   2 
  -1   7   0 371.406 12.6117   5 
   0  -7   0 -0.3145 1.56238   1 
   0  -7   0 -0.4031 1.54313   6 
   0   7   0 0.07255 1.09047   2 
   0   7   0 0.98913 1.17718   7 
   0   7   0 -0.7155 1.46444   5 
   0   7   0 1.40467 1.25421   2 
   0   7   0 0.90190 1.45287   1 
  -1  -7   0 21.2978 3.11395   6 
  -1  -7   0 18.7578 2.59225   1 
   1   7   0 20.9017 2.89634   5 
   1   7   0 22.4632 2.49752   2 
   1   7   0 14.8941 2.05910   2 
   1   7   0 18.7834 2.22224   2 
   1   7   0 16.3660 2.40654   1 
   1   7   0 22.1067 2.35072   7 
  -2  -7   0 635.935 19.6167   6 
  -2  -7   0 637.229 19.4164   1 
   2   7   0 641.366 18.3861   7 
   2   7   0 623.191 19.1596   1 
   2   7   0 639.658 18.4042   7 
   2   7   0 608.449 18.6958   2 
   2   7   0 591.739 18.6984   2 
   2   7   0 639.167 19.7666   5 
  -3  -7   0 24.2496 3.31946   1 
  -3  -7   0 36.4422 3.84437   6 
   3   7   0 40.1973 3.83871   1 
   3   7   0 35.1497 3.29369   2 
   3   7   0 36.9181 4.16436   5 
   3   7   0 33.1532 3.17340   2 
   3   7   0 34.3144 3.02954   7 
  -4  -7   0 98.7031 5.84001   6 
  -4  -7   0 87.0556 5.78128   1 
   4   7   0 85.8946 5.09688   2 
   4   7   0 102.182 5.60185   1 
   4   7   0 99.0368 6.05832   5 
   4   7   0 100.085 5.42325   2 
   4   7   0 99.9928 5.07638   7 
  -5  -7   0 19.4745 3.13524   6 
  -5  -7   0 22.7252 3.49936   1 
   5   7   0 26.9098 3.40497   2 
   5   7   0 23.0418 3.05264   7 
   5   7   0 24.2019 3.68252   1 
   5   7   0 26.1848 3.29568   2 
   5   7   0 25.5773 3.99823   5 
  -6  -7   0 74.6158 5.32731   6 
  -6  -7   0 82.1425 5.92641   1 
   6   7   0 70.1618 5.23331   7 
   6   7   0 84.1468 5.61149   2 
   6   7   0 79.0075 5.49582   2 
   6   7   0 83.1694 6.70043   5 
  -7  -7   0 132.191 7.51121   1 
  -7  -7   0 113.596 6.34143   6 
   7   7   0 98.5523 6.52140   2 
   7   7   0 105.514 6.30806   7 
   7   7   0 101.447 7.16989   5 
  -8  -7   0 22.5784 4.26514   1 
  -8  -7   0 18.2092 4.06356   1 
   8   7   0 25.7518 3.98397   7 
   8   7   0 11.0146 3.74632   5 
  -9  -7   0 4.85477 3.49124   1 
  -9  -7   0 2.48265 3.31365   1 
   9   7   0 -5.4714 2.68332   7 
 -10  -7   0 52.3249 6.24642   1 
  10   7   0 59.1689 6.08764   7 
 -11  -7   0 34.0498 5.95508   1 
  11   7   0 18.2232 4.79221   7 
 -12  -7   0 28.4863 5.76401   1 
  12   7   0 25.0742 5.72971   7 
 -19   8   0 69.3446 9.13295   1 
 -18   8   0 2.44131 5.05976   1 
 -17   8   0 139.686 11.4965   1 
 -16   8   0 26.1183 5.98820   1 
 -15   8   0 112.837 9.44159   1 
  14  -8   0 13.3179 3.91294   1 
 -14   8   0 12.4738 4.51879   1 
  13  -8   0 91.9011 7.77450   1 
  13  -8   0 96.1616 6.29817   7 
 -13   8   0 106.028 8.56338   1 
  12  -8   0 1.12708 2.77566   1 
  12  -8   0 -1.0514 2.07490   7 
 -12   8   0 0.45868 2.92184   1 
  11  -8   0 0.25733 1.98122   7 
  11  -8   0 2.70214 2.59629   1 
  11  -8   0 -0.3151 1.45693   6 
 -11   8   0 -0.4134 2.53153   1 
  10  -8   0 12.3459 3.36003   1 
  10  -8   0 17.1019 2.51458   6 
  10  -8   0 18.7603 2.88395   7 
 -10   8   0 12.3988 3.23831   1 
   9  -8   0 33.5332 3.27291   6 
   9  -8   0 31.3364 3.98892   1 
   9  -8   0 21.3374 2.80479   7 
  -9   8   0 24.8500 3.67078   1 
   8  -8   0 126.254 6.70489   1 
   8  -8   0 129.673 5.85536   6 
  -8   8   0 125.831 5.52317   7 
  -8   8   0 130.446 6.93550   1 
   7  -8   0 2.02646 1.43851   7 
   7  -8   0 1.19998 1.92215   1 
   7  -8   0 -1.1801 1.71612   6 
  -7   8   0 -0.3111 1.87640   1 
  -7   8   0 -0.2702 1.31637   7 
   6  -8   0 13.0319 2.38022   6 
   6  -8   0 10.0442 1.77065   7 
   6  -8   0 9.88003 2.36924   1 
  -6   8   0 9.72884 2.25199   5 
  -6   8   0 6.43067 2.19423   1 
  -6   8   0 8.43868 1.79947   7 
   5  -8   0 2.95276 1.96888   1 
   5  -8   0 -0.6445 1.57383   6 
  -5   8   0 4.69913 1.51507   7 
  -5   8   0 1.73739 1.34048   2 
  -5   8   0 2.78619 1.96252   1 
  -5   8   0 1.73129 1.84247   5 
   4  -8   0 73.2680 4.52177   6 
   4  -8   0 67.9662 4.53674   1 
  -4   8   0 62.5071 3.93193   2 
  -4   8   0 66.1909 3.90457   2 
  -4   8   0 57.8392 3.55153   7 
  -4   8   0 74.0893 4.49429   1 
  -4   8   0 66.7312 4.38845   5 
   3  -8   0 74.8454 4.73944   6 
   3  -8   0 78.6865 4.83672   1 
  -3   8   0 88.7832 4.79136   1 
  -3   8   0 71.3499 4.14439   2 
  -3   8   0 74.5945 4.64939   5 
  -3   8   0 77.7792 4.27507   2 
   2  -8   0 7.64055 2.11860   1 
   2  -8   0 5.95138 2.19733   6 
  -2   8   0 7.43978 1.68189   7 
  -2   8   0 6.99958 2.03077   1 
  -2   8   0 6.57039 1.63239   2 
  -2   8   0 2.89260 1.35150   2 
  -2   8   0 6.57530 2.15659   5 
   1  -8   0 35.5667 3.50961   1 
   1  -8   0 44.5535 4.14248   6 
  -1   8   0 31.8471 2.99472   2 
  -1   8   0 43.5960 3.21416   7 
  -1   8   0 36.1724 3.57142   1 
  -1   8   0 50.3956 3.78801   2 
  -1   8   0 31.8880 3.49066   5 
   0  -8   0 48.1064 4.13134   1 
   0  -8   0 56.6861 4.79590   6 
   0   8   0 50.2862 3.63567   2 
   0   8   0 52.8968 3.63334   2 
   0   8   0 53.6298 3.78029   7 
   0   8   0 49.9747 4.15908   1 
   0   8   0 57.7407 4.73827   5 
  -1  -8   0 10.4223 2.67046   6 
  -1  -8   0 7.97210 2.54263   1 
   1   8   0 15.5257 2.26029   7 
   1   8   0 15.2600 2.41325   2 
   1   8   0 9.96311 2.02025   2 
   1   8   0 6.13613 2.10651   1 
   1   8   0 13.2856 2.78760   5 
  -2  -8   0 -0.2598 1.88556   1 
  -2  -8   0 -1.6831 1.95807   6 
   2   8   0 -1.9963 1.61104   1 
   2   8   0 -3.5053 1.78641   5 
   2   8   0 0.06675 1.45870   2 
   2   8   0 -0.9714 1.43904   2 
   2   8   0 -0.0910 1.44099   7 
   2   8   0 -1.5503 1.44579   2 
  -3  -8   0 60.7504 5.28776   1 
  -3  -8   0 49.0846 4.93728   6 
   3   8   0 55.7781 4.60102   2 
   3   8   0 61.2040 5.01372   1 
   3   8   0 49.2382 3.96054   7 
   3   8   0 60.0469 4.67022   2 
   3   8   0 56.0208 4.08222   7 
   3   8   0 48.9871 4.82027   5 
  -4  -8   0 54.2822 5.16074   6 
  -4  -8   0 44.3146 4.74785   1 
   4   8   0 50.7058 5.12188   1 
   4   8   0 56.4323 4.32779   7 
   4   8   0 48.1370 4.50015   2 
   4   8   0 55.4958 4.65145   2 
   4   8   0 50.1945 5.18381   5 
   4   8   0 53.7981 4.28829   7 
  -5  -8   0 175.190 8.53884   1 
  -5  -8   0 155.234 8.08480   6 
   5   8   0 170.457 8.04704   2 
   5   8   0 161.146 8.64082   5 
   5   8   0 148.160 7.29674   7 
  -6  -8   0 4.27505 2.86843   1 
  -6  -8   0 -0.0930 2.58947   6 
   6   8   0 0.36969 2.71537   5 
   6   8   0 2.94945 2.23716   2 
   6   8   0 0.58024 2.20864   7 
  -7  -8   0 66.7584 6.40791   1 
  -7  -8   0 94.5958 6.15402   6 
   7   8   0 67.7790 6.72267   5 
   7   8   0 69.6207 5.69740   7 
  -8  -8   0 48.3809 5.70532   1 
  -8  -8   0 55.8547 6.23640   1 
   8   8   0 40.0516 4.98697   7 
  -9  -8   0 24.9068 5.11652   1 
  -9  -8   0 24.4688 4.97626   1 
   9   8   0 22.1553 4.57788   7 
 -10  -8   0 65.0194 7.26047   1 
  10   8   0 63.4138 6.73578   7 
 -11  -8   0 24.3836 5.65201   1 
  11   8   0 13.4774 4.90132   7 
 -19   9   0 17.6076 6.67506   1 
 -18   9   0 22.9374 6.34845   1 
 -17   9   0 45.5981 7.17655   1 
 -16   9   0 45.4119 7.16770   1 
  15  -9   0 94.3771 8.34552   1 
 -15   9   0 114.730 9.78967   1 
  14  -9   0 21.3078 4.82741   1 
 -14   9   0 29.8016 5.31043   1 
  13  -9   0 2.91897 3.30754   1 
 -13   9   0 3.80550 3.39900   1 
  12  -9   0 5.74615 3.32129   1 
 -12   9   0 3.42635 3.46632   1 
  11  -9   0 7.29495 3.12524   1 
  11  -9   0 17.7489 3.01035   7 
  11  -9   0 12.0844 2.59054   6 
 -11   9   0 13.2146 3.71526   1 
  10  -9   0 0.77725 1.88093   7 
  10  -9   0 -0.2550 2.41451   1 
  10  -9   0 2.47761 1.99080   6 
 -10   9   0 3.06351 2.77166   1 
   9  -9   0 -0.5954 1.55279   7 
   9  -9   0 0.10746 1.86284   6 
   9  -9   0 1.51013 2.39854   1 
  -9   9   0 0.36868 2.30083   1 
   8  -9   0 12.1439 2.97573   1 
   8  -9   0 2.78861 1.70540   7 
   8  -9   0 5.61930 2.08443   6 
   8  -9   0 8.05685 1.19500   3 
  -8   9   0 8.71284 1.99521   7 
  -8   9   0 4.43212 2.55361   1 
   7  -9   0 23.6395 3.66422   1 
   7  -9   0 18.6731 2.48759   7 
   7  -9   0 17.4535 3.11777   6 
  -7   9   0 16.1257 3.14180   1 
  -7   9   0 25.6013 2.83237   7 
   6  -9   0 1.25926 2.07795   6 
   6  -9   0 2.58230 2.20439   1 
  -6   9   0 1.20525 1.97396   5 
  -6   9   0 3.13135 1.57520   7 
  -6   9   0 1.46071 1.99011   1 
   5  -9   0 41.3491 4.19059   1 
   5  -9   0 57.2032 4.74699   6 
  -5   9   0 46.6795 3.66342   7 
  -5   9   0 57.4746 4.90365   1 
  -5   9   0 44.8498 3.80572   2 
  -5   9   0 47.0538 4.38473   5 
   4  -9   0 69.8762 4.76640   1 
   4  -9   0 55.9729 4.90962   6 
  -4   9   0 72.0157 4.35419   2 
  -4   9   0 70.2992 4.80312   5 
  -4   9   0 73.8570 4.29487   2 
  -4   9   0 65.7359 4.76896   1 
  -4   9   0 58.4550 3.84215   7 
   3  -9   0 166.904 7.63459   1 
   3  -9   0 165.981 7.85577   6 
  -3   9   0 178.451 7.22305   2 
  -3   9   0 171.411 6.74500   7 
  -3   9   0 175.188 7.75842   5 
  -3   9   0 172.080 7.16788   2 
  -3   9   0 162.008 7.50153   1 
   2  -9   0 107.222 5.91762   6 
   2  -9   0 85.4414 5.50533   1 
  -2   9   0 93.4384 4.74408   7 
  -2   9   0 93.8828 5.37364   1 
  -2   9   0 92.6028 5.06223   2 
  -2   9   0 95.8515 5.57424   5 
  -2   9   0 85.3814 4.87001   2 
   1  -9   0 136.613 6.99874   1 
   1  -9   0 148.909 7.54401   6 
  -1   9   0 137.485 6.56004   2 
  -1   9   0 146.245 7.00395   1 
  -1   9   0 152.346 6.71044   2 
  -1   9   0 153.081 6.33267   7 
  -1   9   0 171.918 7.78380   5 
   0  -9   0 3.15964 2.40444   1 
   0  -9   0 3.83016 2.38291   6 
   0   9   0 3.97297 2.22799   5 
   0   9   0 5.48911 1.95788   2 
   0   9   0 3.68619 1.76973   7 
   0   9   0 6.14477 1.90930   2 
   0   9   0 4.22773 2.23861   1 
  -1  -9   0 125.557 6.79991   1 
  -1  -9   0 135.620 7.12476   6 
   1   9   0 119.002 6.40588   1 
   1   9   0 115.959 5.75809   7 
   1   9   0 108.182 6.79765   5 
   1   9   0 122.301 6.21786   2 
   1   9   0 123.041 6.16031   2 
  -2  -9   0 29.6975 3.97524   1 
  -2  -9   0 33.0296 4.27848   6 
   2   9   0 26.3275 3.20345   7 
   2   9   0 30.4400 4.14771   5 
   2   9   0 35.7785 4.06275   1 
   2   9   0 27.5894 3.39047   2 
   2   9   0 25.1274 3.28233   2 
  -3  -9   0 384.515 14.0241   6 
  -3  -9   0 360.703 13.7307   1 
   3   9   0 371.332 14.0759   5 
   3   9   0 346.142 13.0030   2 
   3   9   0 351.667 12.5225   7 
   3   9   0 363.785 14.1925   2 
   3   9   0 354.992 14.7966   1 
   3   9   0 368.745 14.6929   2 
  -4  -9   0 3.32215 2.87641   1 
  -4  -9   0 2.41701 2.57904   6 
   4   9   0 -0.4989 2.18282   7 
   4   9   0 3.06169 2.74285   5 
   4   9   0 1.25090 2.08028   2 
   4   9   0 -0.0177 2.35048   7 
  -5  -9   0 49.3125 5.24290   6 
  -5  -9   0 39.1880 4.95943   1 
   5   9   0 37.4180 4.96967   5 
   5   9   0 48.4936 4.71562   7 
   5   9   0 42.3342 4.52858   7 
  -6  -9   0 48.2448 5.66606   1 
  -6  -9   0 49.7006 5.59046   6 
   6   9   0 49.4508 5.91805   5 
   6   9   0 47.9508 4.92378   7 
   6   9   0 50.6828 5.06645   7 
  -7  -9   0 12.7423 4.08208   1 
   7   9   0 5.43302 3.06086   7 
   7   9   0 9.37530 3.62308   7 
  -8  -9   0 39.9689 5.92359   1 
  -8  -9   0 46.5442 6.16740   1 
   8   9   0 34.2976 4.88582   7 
   8   9   0 41.9628 5.52823   7 
  -9  -9   0 96.7836 8.50090   1 
  -9  -9   0 90.2214 8.33780   1 
   9   9   0 74.0812 6.97563   7 
   9   9   0 67.4725 6.79799   7 
 -10  -9   0 67.8890 7.64493   1 
  10   9   0 36.9771 5.70420   7 
  10   9   0 57.2730 6.72264   7 
 -11  -9   0 36.7118 6.49847   1 
  11   9   0 35.6977 5.93762   7 
  11   9   0 34.4455 6.15479   7 
 -19  10   0 -2.2519 5.35110   1 
 -18  10   0 64.2443 8.68728   1 
 -17  10   0 40.3899 7.19008   1 
 -16  10   0 37.8033 6.49213   1 
  15 -10   0 46.1092 6.68616   1 
 -15  10   0 38.9232 6.17484   1 
  14 -10   0 2.29815 3.54009   1 
 -14  10   0 1.90943 3.71447   1 
  13 -10   0 10.5911 3.94316   1 
 -13  10   0 7.90868 4.07978   1 
  12 -10   0 7.46398 3.69692   1 
  12 -10   0 8.35035 2.57160   6 
 -12  10   0 6.78903 3.69690   1 
  11 -10   0 5.52017 3.24894   1 
  11 -10   0 0.63260 2.19199   6 
 -11  10   0 2.29326 3.11238   1 
  10 -10   0 2.72008 2.23853   6 
  10 -10   0 1.64929 2.69225   1 
 -10  10   0 0.10292 2.71500   1 
   9 -10   0 1.82228 2.66621   1 
   9 -10   0 -3.3595 1.93705   6 
  -9  10   0 -2.0529 2.32543   1 
   8 -10   0 2.74560 2.61893   1 
   8 -10   0 5.38815 2.31885   6 
  -8  10   0 0.50104 2.36763   1 
   7 -10   0 244.484 10.2350   6 
   7 -10   0 263.362 10.8569   1 
  -7  10   0 250.910 9.32433   7 
  -7  10   0 256.193 10.7787   1 
  -7  10   0 263.813 10.7556   5 
   6 -10   0 38.8705 4.38836   6 
   6 -10   0 41.2823 4.63696   1 
  -6  10   0 37.2604 3.47699   7 
  -6  10   0 37.3729 4.36831   1 
  -6  10   0 36.9834 4.22722   5 
   5 -10   0 258.357 10.4649   1 
   5 -10   0 244.210 10.3718   6 
  -5  10   0 251.108 9.17022   7 
  -5  10   0 246.614 10.3321   1 
  -5  10   0 245.279 10.2220   5 
   4 -10   0 8.11558 2.79623   1 
   4 -10   0 9.19543 2.81724   6 
  -4  10   0 7.39763 2.56466   5 
  -4  10   0 10.0181 2.24797   7 
  -4  10   0 6.43351 2.59577   1 
  -4  10   0 6.95475 2.02967   2 
   3 -10   0 178.314 8.81504   6 
   3 -10   0 189.112 8.70879   1 
  -3  10   0 200.800 8.78052   5 
  -3  10   0 177.395 7.49991   7 
  -3  10   0 200.346 8.14796   2 
  -3  10   0 192.839 8.66696   1 
   2 -10   0 117.713 6.59673   1 
   2 -10   0 106.264 6.57062   6 
  -2  10   0 91.2463 5.80551   2 
  -2  10   0 98.3489 5.89363   1 
  -2  10   0 94.1006 5.17271   7 
  -2  10   0 101.426 5.64853   2 
  -2  10   0 107.706 6.30543   5 
   1 -10   0 85.2968 5.84489   1 
   1 -10   0 77.7928 5.78975   6 
  -1  10   0 85.5954 4.90674   7 
  -1  10   0 70.0662 5.20299   1 
  -1  10   0 73.9503 5.04747   2 
  -1  10   0 79.0217 4.98791   2 
  -1  10   0 71.0565 5.84624   5 
   0 -10   0 9.36460 3.14958   6 
   0 -10   0 8.85451 2.80896   1 
   0  10   0 8.99857 2.73126   1 
   0  10   0 7.87874 2.27055   2 
   0  10   0 8.60605 2.38590   7 
   0  10   0 15.3279 3.29856   5 
  -1 -10   0 189.609 9.22575   6 
  -1 -10   0 179.750 8.89881   1 
   1  10   0 168.395 8.77350   5 
   1  10   0 186.391 7.88633   7 
   1  10   0 185.223 8.32708   2 
   1  10   0 175.202 8.42171   1 
  -2 -10   0 2.16960 2.68926   1 
  -2 -10   0 2.67558 2.86319   6 
   2  10   0 3.95034 2.67193   5 
   2  10   0 -0.3803 2.01621   2 
   2  10   0 1.40789 2.18105   7 
  -3 -10   0 76.2696 6.64739   6 
  -3 -10   0 69.9732 6.23465   1 
   3  10   0 80.5899 6.82143   5 
   3  10   0 68.1579 5.27480   7 
  -4 -10   0 31.2488 4.97703   6 
  -4 -10   0 36.8207 4.97836   1 
   4  10   0 34.9150 4.17376   7 
   4  10   0 30.7547 4.97816   5 
  -5 -10   0 62.5297 6.50859   6 
  -5 -10   0 65.0685 6.52958   1 
   5  10   0 59.1893 6.49061   5 
   5  10   0 54.8346 5.39328   7 
  -6 -10   0 31.8897 5.07286   1 
  -6 -10   0 16.3460 4.30857   6 
   6  10   0 25.4711 4.23582   7 
   6  10   0 33.1676 4.65359   7 
  -7 -10   0 43.5236 5.95278   1 
   7  10   0 57.8097 5.99016   7 
   7  10   0 56.3165 5.97758   7 
  -8 -10   0 60.8069 7.08912   1 
  -8 -10   0 44.3642 6.45306   1 
   8  10   0 55.3876 6.30479   7 
   8  10   0 53.2534 6.09725   7 
  -9 -10   0 43.1236 6.54572   1 
  -9 -10   0 51.5828 6.99597   1 
   9  10   0 47.5718 6.36042   7 
   9  10   0 42.4728 6.28606   7 
 -10 -10   0 28.6270 5.87989   1 
  10  10   0 26.6554 5.57807   7 
  10  10   0 32.7965 5.99551   7 
 -19  11   0 2.06282 5.26491   1 
 -18  11   0 22.6633 6.37635   1 
 -17  11   0 14.6555 5.47227   1 
 -16  11   0 10.1120 5.05422   1 
  15 -11   0 17.1888 5.12351   1 
 -15  11   0 5.24523 4.40084   1 
  14 -11   0 1.52401 3.75936   1 
 -14  11   0 -3.8753 3.45768   1 
  13 -11   0 3.91121 3.63149   1 
 -13  11   0 -4.1906 3.49120   1 
  12 -11   0 4.82469 3.72516   1 
  12 -11   0 1.33963 2.31444   6 
 -12  11   0 0.22987 3.12797   1 
  11 -11   0 0.27815 2.93903   1 
  11 -11   0 -3.1039 1.96584   6 
 -11  11   0 -0.2841 3.02807   1 
  10 -11   0 11.4867 3.20110   6 
  10 -11   0 14.0841 3.70350   1 
 -10  11   0 7.12009 3.39923   1 
   9 -11   0 -1.6843 2.75010   1 
   9 -11   0 -0.5167 2.06967   6 
  -9  11   0 -0.5102 2.72262   1 
   8 -11   0 0.59849 2.73515   6 
   8 -11   0 1.24754 2.69173   1 
  -8  11   0 1.03701 2.58597   1 
   7 -11   0 70.1349 5.95974   6 
   7 -11   0 78.8044 6.60602   1 
  -7  11   0 63.6709 4.69651   7 
  -7  11   0 55.3443 5.69087   1 
  -7  11   0 43.3276 4.96551   5 
   6 -11   0 96.7179 6.53685   1 
   6 -11   0 78.7834 6.51748   6 
  -6  11   0 88.8290 5.14116   7 
  -6  11   0 88.2295 6.13873   1 
  -6  11   0 82.9962 6.55791   5 
   5 -11   0 113.125 6.87121   1 
   5 -11   0 115.632 7.04180   6 
  -5  11   0 127.631 7.12074   5 
  -5  11   0 96.0502 5.59259   7 
  -5  11   0 125.917 7.13492   1 
   4 -11   0 2.36726 2.69146   1 
   4 -11   0 0.27131 2.54439   6 
  -4  11   0 0.27426 1.81473   7 
  -4  11   0 2.30703 2.44140   1 
  -4  11   0 -2.1974 2.10058   5 
   3 -11   0 103.084 6.88120   6 
   3 -11   0 104.589 6.55083   1 
  -3  11   0 99.1322 6.49367   5 
  -3  11   0 108.662 6.46858   1 
  -3  11   0 104.467 5.70574   7 
   2 -11   0 57.3394 5.44901   1 
   2 -11   0 57.0121 5.85337   6 
  -2  11   0 66.8952 5.89003   5 
  -2  11   0 70.7811 5.86592   1 
  -2  11   0 52.9545 4.52362   7 
   1 -11   0 196.615 9.49252   1 
   1 -11   0 186.966 9.70913   6 
  -1  11   0 189.881 8.37453   7 
  -1  11   0 214.204 9.41109   1 
  -1  11   0 203.457 9.59136   5 
   0 -11   0 23.4102 4.42825   6 
   0 -11   0 22.0806 4.16483   1 
   0  11   0 17.9830 3.99844   5 
   0  11   0 16.9369 3.02643   7 
   0  11   0 17.5156 3.46011   1 
  -1 -11   0 187.306 9.96466   6 
  -1 -11   0 153.811 8.75376   1 
   1  11   0 178.438 8.09195   7 
   1  11   0 185.781 9.41013   5 
  -2 -11   0 1.69000 3.19477   6 
  -2 -11   0 2.96073 3.09927   1 
   2  11   0 0.41428 2.84218   5 
   2  11   0 3.30231 2.62994   7 
  -3 -11   0 101.107 8.17331   6 
  -3 -11   0 104.775 7.60427   1 
   3  11   0 91.5800 6.57311   7 
   3  11   0 94.5944 7.87156   5 
  -4 -11   0 17.0814 4.74146   6 
  -4 -11   0 14.0720 4.28639   1 
   4  11   0 16.4178 3.79291   7 
   4  11   0 8.29145 3.87170   5 
  -5 -11   0 32.5651 5.29613   6 
  -5 -11   0 30.0069 5.07364   1 
   5  11   0 32.8328 4.63892   7 
  -6 -11   0 84.4582 7.76497   1 
  -6 -11   0 92.1694 8.12018   6 
   6  11   0 91.8091 7.25492   7 
  -7 -11   0 87.5503 8.04522   1 
   7  11   0 76.1576 6.98504   7 
  -8 -11   0 49.1979 6.93168   1 
  -8 -11   0 53.9811 7.15493   1 
   8  11   0 58.6823 6.56013   7 
  -9 -11   0 31.4005 6.24728   1 
  -9 -11   0 28.6498 5.91333   1 
   9  11   0 18.5552 5.14770   7 
 -18  12   0 -7.6537 4.86878   1 
 -17  12   0 -0.9463 5.01905   1 
  16 -12   0 0.08847 4.50097   1 
 -16  12   0 2.50476 4.63384   1 
  15 -12   0 25.6140 5.79889   1 
 -15  12   0 22.3241 5.92957   1 
  14 -12   0 22.0670 5.14489   1 
 -14  12   0 12.5730 4.80041   1 
  13 -12   0 23.6291 5.32245   1 
 -13  12   0 18.3028 5.14603   1 
  12 -12   0 28.7103 4.21815   6 
  12 -12   0 30.4258 5.69442   1 
 -12  12   0 22.1720 5.04265   1 
  11 -12   0 -1.4883 2.73121   6 
  11 -12   0 -2.7013 3.24748   1 
 -11  12   0 0.85220 3.33145   1 
  10 -12   0 48.2952 5.91351   1 
  10 -12   0 53.2801 5.39378   6 
 -10  12   0 51.6171 6.15699   1 
   9 -12   0 7.97508 3.39612   6 
   9 -12   0 9.70962 3.63595   1 
  -9  12   0 8.19762 3.51042   1 
   8 -12   0 29.0569 4.57001   6 
   8 -12   0 23.5616 4.64278   1 
  -8  12   0 29.0520 4.57608   1 
   7 -12   0 3.04965 2.99899   1 
   7 -12   0 1.02286 2.72382   6 
  -7  12   0 5.27493 3.04755   1 
  -7  12   0 4.23650 3.62426   7 
  -7  12   0 6.71883 3.13071   5 
   6 -12   0 77.0259 6.82287   1 
   6 -12   0 74.0582 6.75975   6 
  -6  12   0 91.5443 7.22562   5 
  -6  12   0 93.3824 7.45336   1 
  -6  12   0 80.1106 5.73894   7 
   5 -12   0 165.378 9.15807   6 
   5 -12   0 153.104 8.45258   1 
  -5  12   0 161.362 8.67940   1 
  -5  12   0 162.007 7.46359   7 
  -5  12   0 135.485 8.07971   5 
   4 -12   0 27.2305 4.28644   1 
   4 -12   0 29.6966 4.80299   6 
  -4  12   0 24.6311 3.56164   7 
  -4  12   0 23.3815 4.07163   5 
  -4  12   0 32.7895 4.72676   1 
   3 -12   0 150.829 8.98036   6 
   3 -12   0 157.060 8.78642   1 
  -3  12   0 167.875 7.72943   7 
  -3  12   0 171.017 8.60532   1 
  -3  12   0 168.516 8.81167   5 
   2 -12   0 67.0435 6.73915   6 
   2 -12   0 68.4904 6.22560   1 
  -2  12   0 68.7040 6.36482   5 
  -2  12   0 90.1678 6.28347   1 
  -2  12   0 71.9330 5.44425   7 
   1 -12   0 238.784 11.4470   6 
   1 -12   0 231.679 10.9624   1 
  -1  12   0 219.064 10.4127   1 
  -1  12   0 235.149 9.75683   7 
  -1  12   0 227.012 10.8403   5 
   0 -12   0 7.18804 3.54969   1 
   0 -12   0 12.1412 4.21400   6 
   0  12   0 7.08188 2.97597   7 
   0  12   0 9.37202 3.43437   5 
  -1 -12   0 131.193 8.82595   6 
  -1 -12   0 135.660 8.47777   1 
   1  12   0 149.693 7.69890   7 
   1  12   0 138.074 9.00274   5 
  -2 -12   0 60.3746 6.72704   6 
  -2 -12   0 48.7767 5.91489   1 
   2  12   0 54.5563 5.30165   7 
   2  12   0 50.7182 6.05241   5 
  -3 -12   0 67.4326 7.26157   6 
  -3 -12   0 79.5938 7.59841   1 
   3  12   0 60.5131 5.93772   7 
  -4 -12   0 66.5554 7.31674   6 
  -4 -12   0 66.3273 7.05547   1 
   4  12   0 61.1281 6.01009   7 
  -5 -12   0 32.5027 5.76801   6 
  -5 -12   0 24.9426 5.44874   1 
   5  12   0 31.5822 5.05297   7 
  -6 -12   0 75.9977 7.84392   1 
   6  12   0 64.8061 6.80763   7 
  -7 -12   0 45.7969 6.74773   1 
   7  12   0 35.2406 5.88035   7 
   8  12   0 19.5295 5.24078   7 
 -18  13   0 8.67580 6.05677   1 
 -17  13   0 -3.7659 4.37933   1 
  16 -13   0 3.57197 4.60395   1 
 -16  13   0 1.38475 4.75306   1 
  15 -13   0 13.3465 5.11300   1 
 -15  13   0 7.86028 4.94479   1 
  14 -13   0 2.13193 4.36340   1 
 -14  13   0 0.35270 4.26218   1 
  13 -13   0 2.57246 4.07196   1 
  13 -13   0 4.14698 4.82576   6 
 -13  13   0 3.16902 4.11940   1 
  12 -13   0 33.4338 5.89425   1 
  12 -13   0 34.1525 4.96110   6 
 -12  13   0 35.0428 6.05899   1 
  11 -13   0 2.86537 3.38151   6 
  11 -13   0 -1.8896 3.70232   1 
 -11  13   0 0.98197 3.63239   1 
  10 -13   0 2.32508 2.90465   6 
  10 -13   0 -1.3901 3.48981   1 
 -10  13   0 -3.3309 3.02892   1 
   9 -13   0 7.89043 3.81957   1 
   9 -13   0 15.1130 4.21625   6 
  -9  13   0 16.7173 4.35241   1 
   8 -13   0 4.96390 3.36832   1 
   8 -13   0 -3.3064 2.84419   6 
  -8  13   0 2.35037 2.96732   5 
  -8  13   0 3.83565 3.30553   1 
   7 -13   0 183.647 9.87219   6 
   7 -13   0 191.264 10.3059   1 
  -7  13   0 195.231 9.98298   1 
  -7  13   0 182.151 9.77238   5 
   6 -13   0 99.9829 8.09003   6 
   6 -13   0 91.7386 7.94436   1 
  -6  13   0 102.011 7.14073   1 
  -6  13   0 90.8324 5.96059   7 
  -6  13   0 82.6302 7.15553   5 
   5 -13   0 123.443 8.22709   1 
   5 -13   0 115.039 8.08165   6 
  -5  13   0 119.738 8.00534   1 
  -5  13   0 126.902 7.93071   5 
  -5  13   0 114.304 6.72768   7 
   4 -13   0 -3.7025 2.88782   6 
   4 -13   0 -3.3570 2.80360   1 
  -4  13   0 4.75920 3.13269   5 
  -4  13   0 0.31983 2.56239   7 
  -4  13   0 -0.9107 2.68568   1 
   3 -13   0 184.383 10.1837   6 
   3 -13   0 171.746 9.77575   1 
  -3  13   0 180.940 9.62317   5 
  -3  13   0 174.627 8.36703   7 
  -3  13   0 167.948 9.18197   1 
   2 -13   0 34.1667 5.45373   6 
   2 -13   0 27.6362 4.87951   1 
  -2  13   0 33.3459 5.23275   1 
  -2  13   0 33.2074 5.00804   5 
  -2  13   0 26.7515 4.02618   7 
   1 -13   0 199.161 10.9380   6 
   1 -13   0 168.163 9.87970   1 
  -1  13   0 192.269 10.2396   5 
  -1  13   0 197.084 9.11169   7 
   0 -13   0 7.33078 4.19518   6 
   0 -13   0 10.7272 4.00385   1 
   0  13   0 9.40264 3.71810   5 
   0  13   0 1.97087 2.91444   7 
  -1 -13   0 51.4907 6.27582   1 
  -1 -13   0 49.5015 6.77101   6 
   1  13   0 60.7548 5.76198   7 
  -2 -13   0 2.70872 3.99265   6 
  -2 -13   0 3.33410 3.94638   1 
   2  13   0 7.22908 3.25602   7 
  -3 -13   0 59.1410 7.07925   1 
  -3 -13   0 50.6404 6.95119   6 
   3  13   0 39.4093 5.26314   7 
  -4 -13   0 57.1119 7.03352   1 
  -4 -13   0 52.6177 7.43592   6 
   4  13   0 42.9543 5.61539   7 
  -5 -13   0 10.3905 4.72040   6 
  -5 -13   0 7.19677 4.56342   1 
   5  13   0 -0.5292 3.71378   7 
  -6 -13   0 -0.9698 4.38478   1 
   6  13   0 10.8605 4.75969   7 
 -18  14   0 14.5130 6.14561   1 
 -17  14   0 1.98950 5.21297   1 
  16 -14   0 14.0769 5.88056   1 
 -16  14   0 9.24758 5.56069   1 
  15 -14   0 -0.0442 4.27093   1 
 -15  14   0 5.41507 4.91273   1 
  14 -14   0 45.9205 7.09594   1 
 -14  14   0 44.1295 6.97008   1 
  13 -14   0 -0.9838 4.03334   1 
  13 -14   0 0.01222 3.44810   6 
 -13  14   0 2.44440 4.13644   1 
  12 -14   0 24.6938 5.62309   1 
  12 -14   0 37.1134 5.49890   6 
 -12  14   0 36.4620 6.36930   1 
  11 -14   0 3.15585 4.06873   1 
  11 -14   0 4.68460 3.59123   6 
 -11  14   0 0.53918 3.77143   1 
  10 -14   0 12.7115 4.05921   6 
  10 -14   0 22.6729 5.08336   1 
 -10  14   0 13.2678 4.57865   1 
   9 -14   0 72.6878 7.20194   6 
   9 -14   0 74.8272 7.45005   1 
  -9  14   0 69.4866 7.38097   1 
   8 -14   0 24.6613 5.20226   1 
   8 -14   0 21.0383 4.67860   6 
  -8  14   0 26.9103 4.87314   5 
  -8  14   0 22.5933 4.63330   1 
   7 -14   0 328.707 14.5267   6 
   7 -14   0 304.706 14.1197   1 
  -7  14   0 344.641 14.3475   1 
  -7  14   0 329.168 14.2146   5 
   6 -14   0 68.2300 7.02171   1 
   6 -14   0 80.8007 7.80260   6 
  -6  14   0 63.9862 6.88092   1 
  -6  14   0 81.6692 7.50131   5 
   5 -14   0 156.170 9.60830   1 
   5 -14   0 162.609 9.88838   6 
  -5  14   0 145.056 8.17023   7 
  -5  14   0 152.511 9.25957   5 
  -5  14   0 158.851 9.27565   1 
   4 -14   0 -0.7674 3.45005   6 
   4 -14   0 -2.4193 3.14085   1 
  -4  14   0 1.29149 3.07840   5 
  -4  14   0 4.27250 3.00373   7 
  -4  14   0 2.74452 3.22370   1 
   3 -14   0 219.188 11.6391   1 
   3 -14   0 236.468 12.3807   6 
  -3  14   0 233.888 11.6813   5 
  -3  14   0 235.999 10.4333   7 
   2 -14   0 5.76384 3.90606   1 
   2 -14   0 -2.0977 3.79319   6 
  -2  14   0 4.44530 3.04028   7 
  -2  14   0 -5.5226 2.90606   5 
   1 -14   0 231.241 12.8866   6 
   1 -14   0 225.903 11.9122   1 
  -1  14   0 221.734 10.4715   7 
   0 -14   0 9.24954 4.27231   1 
   0 -14   0 13.4248 5.30733   6 
   0  14   0 9.13970 3.69051   7 
  -1 -14   0 19.4504 5.34756   6 
  -1 -14   0 12.2321 4.84740   1 
   1  14   0 17.3991 4.25719   7 
  -2 -14   0 166.747 10.5055   1 
  -2 -14   0 117.318 10.6530   6 
   2  14   0 133.422 8.84473   7 
  -3 -14   0 94.7618 8.93229   1 
  -3 -14   0 123.126 10.7575   6 
   3  14   0 98.1260 8.05245   7 
  -4 -14   0 26.2598 5.89546   1 
  -4 -14   0 23.2705 5.93406   6 
   4  14   0 26.4533 5.16704   7 
  -5 -14   0 -2.6339 7.06809   6 
  -5 -14   0 2.99252 4.72081   1 
   5  14   0 -2.8290 3.97318   7 
 -17  15   0 11.2740 6.24142   1 
  16 -15   0 10.4381 5.67235   1 
 -16  15   0 8.68641 5.70805   1 
  15 -15   0 1.94301 5.01839   1 
 -15  15   0 5.75505 5.44558   1 
  14 -15   0 68.9371 8.50161   1 
 -14  15   0 68.0144 8.66414   1 
  13 -15   0 5.85210 5.10355   1 
  13 -15   0 2.59541 3.92749   6 
 -13  15   0 0.79955 4.26139   1 
  12 -15   0 70.3036 7.36717   6 
  12 -15   0 84.0497 8.75407   1 
 -12  15   0 74.8914 8.65613   1 
  11 -15   0 6.12522 4.25008   6 
  11 -15   0 7.41890 4.69261   1 
 -11  15   0 4.65440 4.55058   1 
  10 -15   0 18.2594 5.27816   1 
  10 -15   0 15.0378 4.69251   6 
 -10  15   0 18.8305 5.23315   1 
   9 -15   0 63.5850 7.58537   1 
   9 -15   0 60.1700 7.23305   6 
  -9  15   0 58.9123 6.99927   1 
   8 -15   0 -0.4105 3.64508   6 
   8 -15   0 5.20828 4.48985   1 
  -8  15   0 6.29644 3.80010   1 
   7 -15   0 64.8659 7.59635   6 
   7 -15   0 71.4708 7.97536   1 
  -7  15   0 61.2600 7.02760   1 
   6 -15   0 29.0705 5.99761   6 
   6 -15   0 32.7017 5.80587   1 
  -6  15   0 30.6734 5.33772   1 
   5 -15   0 192.151 11.1524   1 
   5 -15   0 178.827 11.2172   6 
   4 -15   0 13.5393 4.86080   6 
   4 -15   0 9.41507 4.61748   1 
   3 -15   0 107.624 9.19487   1 
   3 -15   0 111.660 9.83838   6 
  -3  15   0 110.190 8.64880   7 
   2 -15   0 9.23282 4.62363   1 
   2 -15   0 14.6574 5.25836   6 
  -2  15   0 11.1623 3.88705   7 
   1 -15   0 40.9453 7.00826   6 
   1 -15   0 40.5624 6.53736   1 
  -1  15   0 34.6711 5.17457   7 
   0 -15   0 11.1945 4.76768   1 
   0 -15   0 5.58819 4.85553   6 
   0  15   0 2.65938 3.77092   7 
  -1 -15   0 22.6703 6.10422   6 
  -1 -15   0 18.7586 5.35080   1 
   1  15   0 13.1273 4.52579   7 
  -2 -15   0 66.9089 8.53752   6 
  -2 -15   0 85.9084 8.93177   1 
   2  15   0 65.9199 7.10121   7 
  -3 -15   0 23.8064 6.37641   6 
  -3 -15   0 26.7233 5.98216   1 
   3  15   0 22.0569 6.45124   7 
  -4 -15   0 17.6410 6.38803   6 
  -4 -15   0 14.2350 5.62204   1 
  16 -16   0 37.2142 7.67909   1 
 -16  16   0 38.5670 7.70286   1 
  15 -16   0 1.19253 5.52081   1 
 -15  16   0 6.52075 5.29994   1 
  14 -16   0 48.6818 8.00700   1 
 -14  16   0 53.3397 8.07648   1 
  13 -16   0 1.12905 5.12141   1 
  13 -16   0 5.14188 4.04573   6 
 -13  16   0 -5.1105 4.31306   1 
  12 -16   0 4.06580 4.50273   6 
  12 -16   0 7.40985 5.23131   1 
 -12  16   0 5.16408 4.78617   1 
  11 -16   0 42.1620 7.04766   1 
  11 -16   0 36.4423 6.76320   6 
 -11  16   0 43.9105 6.94600   1 
  10 -16   0 19.8032 5.82319   1 
  10 -16   0 27.6323 6.33861   6 
 -10  16   0 31.9901 5.96827   1 
   9 -16   0 40.8690 6.63571   1 
   9 -16   0 40.1431 7.04068   6 
  -9  16   0 49.4914 7.11809   1 
   8 -16   0 -3.9271 3.92360   6 
   8 -16   0 4.86963 4.85876   1 
  -8  16   0 0.23861 3.87648   1 
   7 -16   0 30.4691 6.21748   1 
   7 -16   0 25.4760 5.83104   6 
  -7  16   0 22.1752 5.45492   1 
   6 -16   0 -2.8731 4.18423   6 
   6 -16   0 3.16343 4.52997   1 
   5 -16   0 238.746 13.2210   1 
   5 -16   0 233.797 13.3437   6 
   4 -16   0 0.20077 4.20412   1 
   4 -16   0 -0.5100 4.46120   6 
   3 -16   0 9.94869 5.12274   6 
   3 -16   0 6.45548 4.56004   1 
   2 -16   0 5.05303 5.59948   6 
   2 -16   0 7.03235 4.97064   1 
   1 -16   0 48.1169 7.61683   6 
   1 -16   0 35.2761 6.29625   1 
   0 -16   0 35.7860 7.74025   6 
   0 -16   0 34.1908 6.48371   1 
  -1 -16   0 1.86393 5.90951   6 
  -1 -16   0 10.0361 5.04436   1 
  -2 -16   0 20.2521 6.05011   1 
  -2 -16   0 20.2288 6.93795   6 
  15 -17   0 14.9659 6.42348   1 
 -15  17   0 -2.3531 4.93519   1 
  14 -17   0 30.1927 7.14677   1 
 -14  17   0 39.6357 7.42623   1 
  13 -17   0 28.2536 6.17015   6 
  13 -17   0 12.6126 6.49584   1 
 -13  17   0 20.7961 6.03695   1 
  12 -17   0 1.98861 5.44319   1 
  12 -17   0 -3.9433 3.86222   6 
 -12  17   0 1.03677 4.66916   1 
  11 -17   0 53.7069 7.64781   6 
  11 -17   0 42.5103 7.49375   1 
 -11  17   0 49.3821 7.46633   1 
  10 -17   0 52.6880 7.87191   1 
  10 -17   0 56.3984 8.11540   6 
 -10  17   0 57.6346 7.90087   1 
   9 -17   0 26.0262 6.64254   6 
   9 -17   0 19.6074 6.02524   1 
  -9  17   0 29.7896 6.08434   1 
   8 -17   0 6.76236 5.69648   6 
   8 -17   0 2.45274 4.78320   1 
   7 -17   0 49.2359 7.67281   1 
   7 -17   0 37.0934 7.26116   6 
   6 -17   0 -2.8390 4.34740   1 
   6 -17   0 6.24700 5.14679   6 
   5 -17   0 99.0693 10.1202   6 
   5 -17   0 96.2161 9.55852   1 
   4 -17   0 1.50904 4.78199   1 
   4 -17   0 4.90638 5.33517   6 
   3 -17   0 33.4729 7.16624   6 
   3 -17   0 30.3870 6.83693   1 
   2 -17   0 12.1288 6.20349   6 
   2 -17   0 12.1515 5.50849   1 
   1 -17   0 48.5876 7.49930   1 
   1 -17   0 30.1388 7.23810   6 
   0 -17   0 17.4436 6.51476   6 
   0 -17   0 22.9861 6.26150   1 
  14 -18   0 -0.5221 5.55084   1 
 -14  18   0 20.4293 6.61192   1 
  13 -18   0 15.9061 6.79881   1 
  13 -18   0 11.0932 5.63991   6 
 -13  18   0 28.5794 6.78626   1 
  12 -18   0 43.1066 7.54440   6 
  12 -18   0 31.2433 7.32451   1 
 -12  18   0 19.4520 6.42446   1 
  11 -18   0 26.9380 6.94902   1 
  11 -18   0 44.2490 7.82104   6 
  10 -18   0 0.01086 5.50349   6 
  10 -18   0 12.9161 5.99959   1 
   9 -18   0 18.8340 6.12406   6 
   9 -18   0 20.9086 6.46724   1 
   8 -18   0 19.3095 6.11754   1 
   8 -18   0 18.5184 6.14726   6 
   7 -18   0 30.7325 7.20575   1 
   7 -18   0 44.5942 7.93131   6 
   6 -18   0 9.16177 5.41746   1 
   6 -18   0 20.9425 6.28285   6 
   5 -18   0 22.4415 6.84856   6 
   5 -18   0 33.4268 7.36189   1 
   4 -18   0 3.52620 5.38661   6 
   4 -18   0 -6.5971 4.37012   1 
   3 -18   0 34.6079 7.24774   1 
   3 -18   0 28.3396 7.26197   6 
   2 -18   0 -7.8244 5.79497   6 
   2 -18   0 2.79254 5.21585   1 
  12 -19   0 22.1704 6.26125   6 
  11 -19   0 13.0800 6.47494   6 
  11 -19   0 5.01154 5.98351   1 
  10 -19   0 0.83743 5.03001   6 
  10 -19   0 -4.5454 5.08173   1 
   9 -19   0 21.6519 7.38923   6 
   9 -19   0 17.8964 6.79878   1 
   8 -19   0 6.64723 5.98093   6 
   8 -19   0 8.71851 6.15310   1 
   7 -19   0 78.7879 10.0475   6 
   7 -19   0 86.5136 10.0084   1 
   6 -19   0 4.84688 6.02729   1 
   6 -19   0 4.21538 6.33542   6 
   5 -19   1 -2.6405 5.08488   1 
   5 -19   1 -1.9800 5.46052   6 
   6 -19   1 30.5762 7.07772   1 
   6 -19   1 30.9656 7.86974   6 
   7 -19   1 -2.0411 5.27255   6 
   7 -19   1 -2.9325 4.70452   1 
   8 -19   1 66.6849 8.95125   1 
   8 -19   1 51.6122 8.68773   6 
   9 -19   1 9.94296 5.90318   1 
   9 -19   1 -0.7213 5.00646   6 
  10 -19   1 4.01268 5.36756   6 
  10 -19   1 12.8759 6.02109   1 
  11 -19   1 10.7151 6.00016   1 
  11 -19   1 10.3291 5.56240   6 
  12 -19   1 36.5759 7.97450   6 
  12 -19   1 41.7734 7.87238   1 
   2 -18   1 28.6101 6.53275   1 
   2 -18   1 17.7590 6.61067   6 
   3 -18   1 21.1557 6.21602   1 
   3 -18   1 14.6883 6.43057   6 
   4 -18   1 18.0758 6.29746   1 
   4 -18   1 25.5052 6.81546   6 
   5 -18   1 -0.8924 4.82732   1 
   5 -18   1 0.13548 5.08075   6 
   6 -18   1 43.2549 7.35287   1 
   6 -18   1 31.5901 7.20052   6 
   7 -18   1 25.7192 6.45346   1 
   7 -18   1 13.8846 6.35195   6 
   8 -18   1 43.1049 7.36404   1 
   8 -18   1 56.1828 8.75624   6 
   9 -18   1 7.54149 5.86500   6 
   9 -18   1 1.10345 5.43636   1 
  10 -18   1 38.7425 7.49738   1 
  10 -18   1 30.8077 6.95708   6 
  11 -18   1 17.7417 6.33072   6 
  11 -18   1 15.0675 6.33109   1 
 -12  18  -1 33.8011 7.14877   1 
  12 -18   1 38.2405 7.49988   1 
  12 -18   1 51.2948 7.94014   6 
 -13  18  -1 1.96536 5.00831   1 
  13 -18   1 12.9743 5.65841   6 
  13 -18   1 0.03693 5.55730   1 
 -14  18  -1 6.54963 5.40418   1 
  14 -18   1 1.71045 5.91365   1 
   0 -17   1 51.5823 8.45819   6 
   0 -17   1 50.0373 7.58066   1 
   1 -17   1 46.4856 7.35794   1 
   1 -17   1 24.2812 7.53328   6 
   2 -17   1 32.2019 7.15157   6 
   2 -17   1 19.9693 5.92614   1 
   3 -17   1 -5.4337 4.19871   1 
   3 -17   1 0.68104 4.86125   6 
   4 -17   1 54.5316 7.54076   1 
   4 -17   1 46.5377 7.69590   6 
   5 -17   1 1.61433 4.88412   6 
   5 -17   1 17.8763 5.71763   1 
   6 -17   1 79.6554 8.73450   1 
   6 -17   1 80.6830 9.38047   6 
   7 -17   1 0.98253 5.49206   6 
   7 -17   1 3.75522 4.75025   1 
   8 -17   1 81.8993 8.87445   6 
   8 -17   1 65.5574 8.30054   1 
   9 -17   1 11.9565 5.19281   6 
   9 -17   1 7.28603 5.35667   1 
 -10  17  -1 106.332 9.91769   1 
  10 -17   1 113.653 10.6583   1 
  10 -17   1 93.9885 9.45828   6 
 -11  17  -1 17.6464 5.48917   1 
  11 -17   1 21.7578 5.74734   6 
  11 -17   1 12.2041 5.79820   1 
 -12  17  -1 17.8620 5.81215   1 
  12 -17   1 30.3974 6.28298   6 
  12 -17   1 22.2254 6.56776   1 
 -13  17  -1 2.67289 5.10076   1 
  13 -17   1 -1.1135 5.32985   1 
  13 -17   1 -2.9433 4.48452   6 
 -14  17  -1 -3.3295 5.10534   1 
  14 -17   1 1.04245 5.48171   1 
 -15  17  -1 24.8699 7.04562   1 
  15 -17   1 36.3541 7.98040   1 
  -2 -16   1 23.7443 6.04332   1 
  -2 -16   1 19.9929 6.92963   6 
  -1 -16   1 62.4190 8.71286   6 
  -1 -16   1 59.6916 7.90788   1 
   0 -16   1 22.6545 6.90405   6 
   0 -16   1 23.9262 5.77646   1 
   1 -16   1 10.8342 5.56264   6 
   1 -16   1 6.07451 4.47436   1 
   2 -16   1 20.4380 5.99834   6 
   2 -16   1 33.1229 6.06809   1 
   3 -16   1 0.34621 4.47905   1 
   3 -16   1 3.58554 4.41370   6 
   4 -16   1 157.130 10.6746   1 
   4 -16   1 148.001 10.7400   6 
   5 -16   1 0.34233 4.58327   6 
   5 -16   1 -3.2038 4.15799   1 
   6 -16   1 65.5543 8.04633   6 
   6 -16   1 64.4868 7.51847   1 
   7 -16   1 5.29189 4.59547   6 
   7 -16   1 3.67354 4.54409   1 
  -8  16  -1 52.2858 7.02945   1 
   8 -16   1 54.3644 7.40298   6 
   8 -16   1 52.5498 7.48394   1 
  -9  16  -1 55.1959 7.22585   1 
   9 -16   1 66.3309 7.86212   1 
   9 -16   1 72.5097 8.30180   6 
 -10  16  -1 108.526 9.72226   1 
  10 -16   1 88.7167 8.82745   6 
  10 -16   1 109.632 9.90250   1 
 -11  16  -1 -1.4652 4.42020   1 
  11 -16   1 -7.2870 3.34602   6 
  11 -16   1 -2.7043 4.22549   1 
 -12  16  -1 7.73586 5.18045   1 
  12 -16   1 0.83766 4.77247   1 
  12 -16   1 0.03274 4.21654   6 
 -13  16  -1 58.0001 7.93605   1 
  13 -16   1 58.2584 8.30064   1 
  13 -16   1 47.4276 6.81484   6 
 -14  16  -1 3.78181 5.00207   1 
  14 -16   1 2.13575 5.42340   1 
 -15  16  -1 4.46543 5.38613   1 
  15 -16   1 7.59079 5.81411   1 
 -16  16  -1 -2.6944 5.19368   1 
  16 -16   1 -1.1561 5.62236   1 
   4  15  -1 27.3059 5.62679   7 
  -4 -15   1 25.6372 6.79899   6 
  -4 -15   1 26.9041 6.05732   1 
   3  15  -1 16.6612 4.75044   7 
  -3 -15   1 16.7200 5.24824   1 
  -3 -15   1 10.0978 5.55388   6 
   2  15  -1 41.3664 6.18629   7 
  -2 -15   1 42.9244 7.19908   6 
  -2 -15   1 41.0128 6.66066   1 
   1  15  -1 56.6977 6.45488   7 
  -1 -15   1 74.9608 7.95993   1 
  -1 -15   1 61.1642 8.15132   6 
   0  15  -1 7.40988 3.74743   7 
   0 -15   1 4.85457 4.37425   1 
   0 -15   1 5.46873 4.83798   6 
  -1  15  -1 6.96530 3.89988   7 
   1 -15   1 5.22682 4.25003   1 
   1 -15   1 4.52465 4.70066   6 
  -2  15  -1 105.310 7.69411   7 
   2 -15   1 94.4448 9.56563   6 
   2 -15   1 84.2385 8.22480   1 
  -3  15  -1 -1.0455 3.02711   7 
   3 -15   1 6.65155 4.50410   6 
   3 -15   1 2.29394 3.76137   1 
  -4  15  -1 140.922 8.63209   7 
   4 -15   1 165.822 10.4305   1 
   4 -15   1 167.415 10.6756   6 
   5 -15   1 39.3831 6.46104   6 
   5 -15   1 25.9552 5.51679   1 
  -6  15  -1 35.0049 5.65928   1 
   6 -15   1 38.2741 5.88294   1 
   6 -15   1 33.4813 6.09880   6 
  -7  15  -1 1.69885 3.66361   1 
   7 -15   1 5.37665 4.17679   1 
   7 -15   1 8.16028 4.42872   6 
  -8  15  -1 93.6372 8.48164   1 
   8 -15   1 86.1100 8.44131   6 
   8 -15   1 90.4248 8.53452   1 
  -9  15  -1 60.6448 7.30035   1 
   9 -15   1 56.9000 7.37841   1 
   9 -15   1 64.5354 7.35845   6 
 -10  15  -1 20.0038 5.19456   1 
  10 -15   1 19.8932 5.13723   6 
  10 -15   1 20.4922 5.53693   1 
 -11  15  -1 31.6921 6.12075   1 
  11 -15   1 51.9688 7.29035   1 
  11 -15   1 31.3107 5.52388   6 
 -12  15  -1 14.3097 5.19659   1 
  12 -15   1 6.96506 4.35565   6 
  12 -15   1 4.19210 4.55781   1 
 -13  15  -1 23.6466 5.87978   1 
  13 -15   1 33.0679 6.42148   1 
  13 -15   1 37.1910 5.77848   6 
 -14  15  -1 2.02751 4.83313   1 
  14 -15   1 6.83985 5.03354   1 
 -15  15  -1 5.53660 4.96989   1 
  15 -15   1 5.11808 5.32799   1 
 -16  15  -1 -3.4465 4.97601   1 
  16 -15   1 3.29927 5.20477   1 
 -17  15  -1 1.63205 5.10963   1 
  17 -15   1 7.26827 6.25533   1 
   5  14  -1 27.5395 5.41020   7 
  -5 -14   1 30.3593 6.88939   6 
  -5 -14   1 29.9558 6.13287   1 
   4  14  -1 52.1808 6.46461   7 
  -4 -14   1 59.3920 7.93668   6 
  -4 -14   1 67.1490 7.75760   1 
   3  14  -1 119.547 8.90621   7 
  -3 -14   1 114.174 10.4592   6 
  -3 -14   1 127.177 10.0010   1 
   2  14  -1 17.1718 4.45393   7 
  -2 -14   1 28.6096 6.09617   6 
  -2 -14   1 21.2403 5.28440   1 
   1  14  -1 2.13249 3.41411   7 
  -1 -14   1 1.47837 3.79681   1 
  -1 -14   1 1.45136 4.79955   6 
   0  14  -1 51.5226 5.68019   7 
   0 -14   1 55.0931 6.59992   1 
   0 -14   1 63.4986 7.62183   6 
  -1  14  -1 0.22103 3.08769   7 
   1 -14   1 -0.4514 4.05336   6 
   1 -14   1 0.34418 3.80704   1 
  -2  14  -1 190.844 9.42097   7 
  -2  14  -1 188.283 10.5199   5 
   2 -14   1 213.291 11.0889   1 
   2 -14   1 197.958 11.7790   6 
  -3  14  -1 1.99566 3.35202   5 
  -3  14  -1 7.83044 3.11041   7 
   3 -14   1 4.15578 3.90498   6 
   3 -14   1 5.45629 3.78212   1 
  -4  14  -1 150.734 9.03168   1 
  -4  14  -1 144.856 8.12653   7 
  -4  14  -1 142.478 9.01714   5 
   4 -14   1 155.499 9.53230   1 
   4 -14   1 167.507 10.4684   6 
  -5  14  -1 92.4040 7.88897   1 
  -5  14  -1 100.386 8.15597   5 
  -5  14  -1 102.401 6.71140   7 
   5 -14   1 91.6485 7.86060   1 
   5 -14   1 96.0715 8.56875   6 
  -6  14  -1 180.103 9.84664   5 
  -6  14  -1 169.431 9.72647   1 
   6 -14   1 151.918 9.68723   1 
   6 -14   1 150.302 9.67695   6 
  -7  14  -1 36.6364 5.49419   1 
  -7  14  -1 38.4215 5.43497   5 
   7 -14   1 28.6187 5.30602   6 
   7 -14   1 27.0563 5.37319   1 
  -8  14  -1 68.0542 6.85883   5 
  -8  14  -1 81.9456 7.71367   1 
   8 -14   1 82.3850 7.58461   6 
   8 -14   1 79.9848 7.72791   1 
  -9  14  -1 42.5826 6.19377   1 
   9 -14   1 47.4137 6.53012   1 
   9 -14   1 42.5522 6.02468   6 
 -10  14  -1 6.86151 3.74810   1 
  10 -14   1 2.63766 4.07990   1 
  10 -14   1 3.15185 3.39244   6 
 -11  14  -1 -2.5047 3.67994   1 
  11 -14   1 2.72642 4.12609   1 
  11 -14   1 4.82111 3.32659   6 
 -12  14  -1 1.56268 4.09242   1 
  12 -14   1 -0.4897 4.23775   1 
  12 -14   1 1.65287 3.38202   6 
 -13  14  -1 1.21141 4.31575   1 
  13 -14   1 7.11036 3.72211   6 
  13 -14   1 6.63174 4.64649   1 
 -14  14  -1 -0.4497 4.26660   1 
  14 -14   1 1.22899 4.32453   1 
 -15  14  -1 2.57260 4.90541   1 
  15 -14   1 -3.7833 4.22263   1 
 -16  14  -1 3.54345 5.34351   1 
  16 -14   1 -0.3406 5.21738   1 
 -17  14  -1 -0.7821 4.98818   1 
 -18  14  -1 1.72891 5.99588   1 
   7  13  -1 1.47952 4.25287   7 
   6  13  -1 25.1445 5.13288   7 
  -6 -13   1 24.4715 5.58253   1 
   5  13  -1 76.2881 7.27399   7 
  -5 -13   1 90.3136 8.71178   6 
  -5 -13   1 79.4291 8.02235   1 
   4  13  -1 24.7305 4.83583   7 
  -4 -13   1 28.0095 5.70593   6 
  -4 -13   1 31.2068 5.65283   1 
   3  13  -1 70.7474 6.58306   7 
  -3 -13   1 81.7851 7.64646   1 
  -3 -13   1 72.7835 8.02781   6 
   2  13  -1 25.5238 4.36537   7 
  -2 -13   1 24.8597 5.78557   6 
  -2 -13   1 26.6179 5.21218   1 
   1  13  -1 4.92787 3.15457   7 
   1  13  -1 4.58534 3.60725   5 
  -1 -13   1 9.68778 4.80015   6 
  -1 -13   1 11.6888 3.97954   1 
   0  13  -1 134.177 7.63034   7 
   0  13  -1 128.069 8.40638   5 
   0 -13   1 131.370 9.08937   6 
   0 -13   1 115.554 8.37350   1 
  -1  13  -1 1.46065 2.58406   7 
  -1  13  -1 2.46731 3.00487   5 
   1 -13   1 3.20817 3.21936   1 
   1 -13   1 -0.0150 3.55857   6 
  -2  13  -1 92.9401 6.53078   7 
  -2  13  -1 79.6421 7.10128   5 
   2 -13   1 96.7632 7.93044   1 
   2 -13   1 93.7434 8.29334   6 
  -3  13  -1 41.8271 5.34986   5 
  -3  13  -1 43.6402 5.29023   1 
  -3  13  -1 39.4145 4.52198   7 
   3 -13   1 41.5340 5.78452   6 
   3 -13   1 37.9685 5.21013   1 
  -4  13  -1 75.5898 6.82321   1 
  -4  13  -1 85.2793 6.11843   7 
  -4  13  -1 68.2832 6.55019   5 
   4 -13   1 76.7945 7.49196   6 
   4 -13   1 76.8232 7.04490   1 
  -5  13  -1 105.910 7.27483   1 
  -5  13  -1 91.9315 6.09718   7 
  -5  13  -1 102.156 7.18225   5 
   5 -13   1 103.622 7.61581   6 
   5 -13   1 98.0585 7.81505   1 
  -6  13  -1 163.054 9.07715   5 
  -6  13  -1 161.530 9.15522   1 
  -6  13  -1 161.577 7.89704   7 
   6 -13   1 158.006 9.27926   1 
   6 -13   1 163.919 9.37690   6 
  -7  13  -1 13.8001 3.96542   1 
  -7  13  -1 18.5751 4.07698   5 
   7 -13   1 17.8856 4.45955   1 
   7 -13   1 14.9632 4.14607   6 
  -8  13  -1 51.5940 6.01527   1 
   8 -13   1 54.4000 6.08737   6 
   8 -13   1 48.7534 6.03905   1 
  -9  13  -1 18.6037 4.37209   1 
   9 -13   1 25.5624 4.53690   6 
   9 -13   1 27.2362 5.14214   1 
 -10  13  -1 0.91940 3.52253   1 
  10 -13   1 -0.7444 3.67176   1 
  10 -13   1 -1.7669 3.15451   6 
 -11  13  -1 -2.5692 3.17870   1 
  11 -13   1 0.84079 3.80358   1 
  11 -13   1 -1.7165 3.08421   6 
 -12  13  -1 25.5609 5.38013   1 
  12 -13   1 27.5739 5.55608   1 
  12 -13   1 26.4509 4.53744   6 
 -13  13  -1 9.27908 4.70418   1 
  13 -13   1 7.29410 4.63316   1 
 -14  13  -1 14.0988 5.35857   1 
  14 -13   1 10.7390 4.97621   1 
 -15  13  -1 1.64643 4.52188   1 
  15 -13   1 2.67934 4.47873   1 
 -16  13  -1 2.52634 5.01586   1 
  16 -13   1 3.84300 4.70275   1 
 -17  13  -1 0.30975 5.13304   1 
 -18  13  -1 0.79029 5.14289   1 
   8  12  -1 83.9512 7.82424   7 
  -8 -12   1 85.4765 8.54265   1 
  -8 -12   1 94.5713 8.92379   1 
   7  12  -1 27.4542 5.23363   7 
  -7 -12   1 33.6074 5.94732   1 
   6  12  -1 14.2186 4.42076   7 
  -6 -12   1 19.7264 7.51499   6 
  -6 -12   1 16.0566 4.88468   1 
   5  12  -1 31.5745 4.96855   7 
  -5 -12   1 26.7804 5.70348   6 
  -5 -12   1 26.8898 5.05531   1 
   4  12  -1 55.0750 5.67285   7 
  -4 -12   1 67.4893 7.10893   1 
  -4 -12   1 59.9586 6.98015   6 
   3  12  -1 0.60925 3.89957   5 
   3  12  -1 1.28555 2.78794   7 
  -3 -12   1 0.64282 4.02539   6 
  -3 -12   1 -0.1757 3.34279   1 
   2  12  -1 105.850 6.85025   7 
   2  12  -1 121.069 8.06820   5 
  -2 -12   1 115.526 8.23570   6 
  -2 -12   1 107.482 7.78630   1 
   1  12  -1 -2.7203 2.51263   5 
   1  12  -1 -0.2110 2.52208   7 
  -1 -12   1 -3.9610 2.77723   1 
  -1 -12   1 1.66813 3.90224   6 
   0  12  -1 112.694 7.75887   5 
   0  12  -1 98.5096 6.26952   7 
   0 -12   1 101.980 7.97188   1 
   0 -12   1 111.721 7.84961   6 
  -1  12  -1 -0.1656 2.49655   5 
  -1  12  -1 0.79386 2.43504   7 
  -1  12  -1 -2.4684 2.30918   1 
   1 -12   1 3.22981 3.12509   1 
   1 -12   1 -3.5240 2.84412   6 
  -2  12  -1 148.341 8.05003   1 
  -2  12  -1 170.635 8.75656   5 
  -2  12  -1 155.489 7.45968   7 
   2 -12   1 150.112 8.69546   1 
   2 -12   1 159.305 9.10109   6 
  -3  12  -1 209.188 9.93096   5 
  -3  12  -1 203.199 8.70843   7 
  -3  12  -1 211.744 9.87584   1 
   3 -12   1 204.158 9.87164   1 
   3 -12   1 211.365 10.4518   6 
  -4  12  -1 38.1403 4.86844   5 
  -4  12  -1 37.2359 4.65822   1 
  -4  12  -1 41.1702 4.20945   7 
   4 -12   1 37.4851 4.68447   1 
   4 -12   1 40.2523 5.22812   6 
  -5  12  -1 0.27265 2.27366   7 
  -5  12  -1 0.08618 2.41382   1 
  -5  12  -1 0.46063 2.46673   5 
   5 -12   1 1.30052 2.90894   1 
   5 -12   1 1.38164 2.87555   6 
  -6  12  -1 37.3413 5.04489   5 
  -6  12  -1 39.9270 4.02726   7 
  -6  12  -1 31.1280 4.62772   1 
   6 -12   1 34.8957 4.95846   1 
   6 -12   1 33.2504 4.81935   6 
  -7  12  -1 -0.0276 2.52189   5 
  -7  12  -1 -1.6392 1.95062   7 
  -7  12  -1 0.96014 2.77392   1 
   7 -12   1 -1.1271 2.65595   1 
   7 -12   1 -0.7869 2.49231   6 
  -8  12  -1 92.7567 6.82086   1 
   8 -12   1 89.6801 7.30849   1 
   8 -12   1 92.1636 6.50772   6 
  -9  12  -1 31.6958 4.73874   1 
   9 -12   1 32.2870 4.84230   1 
   9 -12   1 33.5003 4.74461   6 
 -10  12  -1 24.4551 4.68242   1 
  10 -12   1 26.4643 4.75470   1 
  10 -12   1 12.5352 3.44836   6 
 -11  12  -1 1.19355 3.40779   1 
  11 -12   1 -0.7190 3.59401   1 
  11 -12   1 5.42998 2.94952   6 
 -12  12  -1 -0.4605 3.32897   1 
  12 -12   1 -3.1291 3.30890   1 
  12 -12   1 -2.5511 2.28842   6 
 -13  12  -1 6.19297 4.19511   1 
  13 -12   1 -4.5018 3.27209   1 
 -14  12  -1 30.0580 5.90526   1 
  14 -12   1 36.0193 6.30511   1 
 -15  12  -1 27.6095 6.10108   1 
  15 -12   1 18.8574 5.18471   1 
 -16  12  -1 4.36185 4.91089   1 
  16 -12   1 2.26649 4.60759   1 
 -17  12  -1 19.5137 6.29495   1 
 -18  12  -1 43.5505 8.25104   1 
   9  11  -1 12.7183 4.91991   7 
  -9 -11   1 14.8664 5.07792   1 
   8  11  -1 42.8031 5.92028   7 
  -8 -11   1 51.9613 6.73149   1 
  -8 -11   1 50.0343 6.75914   1 
   7  11  -1 76.8294 6.99970   7 
  -7 -11   1 97.2724 8.39879   1 
   6  11  -1 23.0339 4.48607   7 
  -6 -11   1 22.7610 4.87809   1 
  -6 -11   1 28.0742 5.34949   6 
   5  11  -1 50.7779 5.44399   7 
  -5 -11   1 65.4099 6.93671   6 
  -5 -11   1 58.9469 6.27742   1 
   4  11  -1 72.5639 6.96851   5 
   4  11  -1 66.8593 5.75716   7 
  -4 -11   1 62.6707 6.37417   1 
  -4 -11   1 70.1680 7.15726   6 
   3  11  -1 3.79745 3.45080   5 
   3  11  -1 7.48153 2.94945   7 
  -3 -11   1 -0.6886 3.15620   6 
  -3 -11   1 4.29080 3.22158   1 
   2  11  -1 128.953 8.16253   5 
   2  11  -1 107.771 6.47289   7 
  -2 -11   1 126.825 7.71356   1 
  -2 -11   1 117.672 7.90482   6 
   1  11  -1 0.02133 2.11042   7 
   1  11  -1 2.14068 3.08913   5 
  -1 -11   1 4.29684 2.96703   1 
  -1 -11   1 3.61078 3.16227   6 
   0  11  -1 163.238 8.26078   2 
   0  11  -1 187.337 8.79443   1 
   0  11  -1 191.456 8.13050   7 
   0  11  -1 176.678 9.07902   5 
   0 -11   1 179.314 9.06662   1 
   0 -11   1 193.590 9.70123   6 
  -1  11  -1 -0.4460 1.79584   2 
  -1  11  -1 -3.8767 1.77653   7 
  -1  11  -1 0.69884 2.18714   1 
  -1  11  -1 2.58500 2.55660   5 
   1 -11   1 1.02580 2.71530   6 
   1 -11   1 -1.7819 2.37649   1 
  -2  11  -1 22.6559 3.15191   7 
  -2  11  -1 21.1928 3.66774   5 
  -2  11  -1 25.8355 3.88214   1 
  -2  11  -1 26.3984 3.59689   2 
   2 -11   1 19.7667 3.82348   1 
   2 -11   1 22.6648 4.20928   6 
  -3  11  -1 14.3751 3.21568   5 
  -3  11  -1 11.4907 2.99631   1 
  -3  11  -1 16.8296 2.87828   7 
   3 -11   1 12.5968 3.45216   6 
   3 -11   1 21.2624 3.77614   1 
  -4  11  -1 195.056 9.19253   1 
  -4  11  -1 202.380 8.21169   7 
  -4  11  -1 202.999 9.29194   5 
   4 -11   1 192.866 9.48033   6 
   4 -11   1 208.444 9.37343   1 
  -5  11  -1 -0.5480 1.91304   7 
  -5  11  -1 0.43467 2.20285   1 
  -5  11  -1 0.70755 2.66489   5 
   5 -11   1 -0.6509 2.31211   6 
   5 -11   1 -2.8045 2.26018   1 
  -6  11  -1 135.423 7.68020   1 
  -6  11  -1 134.901 7.47776   5 
  -6  11  -1 139.939 6.52322   7 
   6 -11   1 135.558 7.52720   6 
   6 -11   1 139.640 7.78314   1 
  -7  11  -1 6.00871 2.16286   7 
  -7  11  -1 5.59380 2.66283   1 
  -7  11  -1 0.95184 2.43454   5 
   7 -11   1 2.44036 2.81838   1 
   7 -11   1 5.26807 2.70916   6 
  -8  11  -1 40.5064 5.13551   1 
   8 -11   1 39.2799 5.01470   1 
   8 -11   1 32.4057 4.38497   6 
  -9  11  -1 -0.3439 2.73747   1 
   9 -11   1 -1.3111 2.64469   1 
   9 -11   1 -0.8226 2.06049   6 
 -10  11  -1 2.14011 3.06941   1 
  10 -11   1 1.28702 2.50902   6 
  10 -11   1 4.92422 3.29644   1 
 -11  11  -1 25.8343 4.86067   1 
  11 -11   1 22.3780 3.66596   6 
  11 -11   1 25.8309 4.74762   1 
 -12  11  -1 7.32546 3.96936   1 
  12 -11   1 2.60536 2.54712   6 
  12 -11   1 9.18832 3.88355   1 
 -13  11  -1 0.16116 3.53291   1 
  13 -11   1 0.64746 3.49325   1 
 -14  11  -1 -2.8904 3.50533   1 
  14 -11   1 -0.3585 3.87677   1 
 -15  11  -1 3.04840 4.39867   1 
  15 -11   1 2.04960 3.98697   1 
 -16  11  -1 6.86535 5.22716   1 
  16 -11   1 11.7193 4.91584   1 
 -17  11  -1 2.56841 4.75618   1 
 -18  11  -1 83.3280 10.1008   1 
  10  10  -1 2.93087 4.46267   7 
  10  10  -1 4.67463 4.37823   7 
 -10 -10   1 8.96423 4.66085   1 
   9  10  -1 20.6914 4.92854   7 
   9  10  -1 28.8149 5.29688   7 
  -9 -10   1 37.8821 5.99859   1 
  -9 -10   1 15.8252 4.96701   1 
   8  10  -1 31.4656 5.27950   7 
   8  10  -1 44.4485 5.50638   7 
  -8 -10   1 41.3453 5.79371   1 
  -8 -10   1 36.1595 5.86556   1 
   7  10  -1 63.9155 6.01200   7 
   7  10  -1 70.0317 6.34180   7 
  -7 -10   1 64.6473 6.86219   1 
   6  10  -1 42.2772 4.92233   7 
   6  10  -1 38.9304 4.75588   7 
  -6 -10   1 37.0020 5.42691   1 
  -6 -10   1 35.8051 5.39892   6 
   5  10  -1 51.6252 5.04169   7 
   5  10  -1 50.9485 5.93212   5 
  -5 -10   1 52.1117 5.92661   1 
  -5 -10   1 55.5239 6.18171   6 
   4  10  -1 56.4704 5.99519   5 
   4  10  -1 61.1994 5.10594   7 
  -4 -10   1 63.6231 6.30005   6 
  -4 -10   1 49.2647 5.43180   1 
   3  10  -1 22.0078 4.02654   5 
   3  10  -1 23.6476 3.52064   2 
   3  10  -1 20.6648 3.27156   7 
  -3 -10   1 16.3623 4.05999   6 
  -3 -10   1 15.9597 3.68891   1 
   2  10  -1 20.9423 3.34103   2 
   2  10  -1 16.4326 2.98258   7 
   2  10  -1 14.9446 3.54977   5 
  -2 -10   1 19.1927 4.19905   6 
  -2 -10   1 12.8680 3.31658   1 
   1  10  -1 4.81592 2.12571   7 
   1  10  -1 -0.2537 2.21995   5 
   1  10  -1 4.49844 2.03410   2 
   1  10  -1 7.64310 2.38890   2 
   1  10  -1 1.26897 2.00323   1 
  -1 -10   1 2.47522 2.73558   1 
  -1 -10   1 2.55510 2.70849   6 
   0  10  -1 2.93709 1.73820   2 
   0  10  -1 5.14239 2.54565   5 
   0  10  -1 2.14421 2.11119   1 
   0  10  -1 3.19516 1.84659   2 
   0  10  -1 2.23527 1.98863   7 
   0 -10   1 0.86808 2.37757   1 
   0 -10   1 3.40327 2.75319   6 
  -1  10  -1 59.4905 4.43575   2 
  -1  10  -1 61.6013 4.42975   7 
  -1  10  -1 69.8702 5.56201   1 
  -1  10  -1 48.6924 4.29123   2 
  -1  10  -1 53.9597 5.04381   5 
   1 -10   1 50.6759 5.28786   6 
   1 -10   1 56.0400 5.16530   1 
  -2  10  -1 3.63496 2.34728   5 
  -2  10  -1 0.89734 1.53606   2 
  -2  10  -1 0.11458 1.57900   7 
  -2  10  -1 -0.3368 1.79795   1 
  -2  10  -1 2.31399 1.63258   2 
   2 -10   1 0.77922 2.12842   1 
   2 -10   1 3.12004 2.53461   6 
  -3  10  -1 57.1048 4.65934   2 
  -3  10  -1 53.4257 4.10757   7 
  -3  10  -1 57.1757 5.06918   5 
  -3  10  -1 43.4543 4.35519   1 
  -3  10  -1 45.8261 4.11494   2 
   3 -10   1 57.5308 4.98822   1 
   3 -10   1 53.3408 5.10543   6 
  -4  10  -1 299.387 11.0718   1 
  -4  10  -1 270.842 10.8559   5 
  -4  10  -1 276.049 10.3548   2 
  -4  10  -1 264.544 9.79681   7 
   4 -10   1 279.027 11.2383   6 
   4 -10   1 277.297 11.0113   1 
  -5  10  -1 92.1254 5.53114   2 
  -5  10  -1 75.6321 4.56660   7 
  -5  10  -1 80.4279 5.59462   1 
  -5  10  -1 77.9531 5.34865   5 
   5 -10   1 78.3655 5.47233   6 
   5 -10   1 79.0852 5.58603   1 
  -6  10  -1 49.8348 4.87634   1 
  -6  10  -1 51.3495 4.82074   5 
  -6  10  -1 50.2011 4.04463   7 
   6 -10   1 47.6118 4.84121   6 
  -7  10  -1 30.9256 4.09035   1 
  -7  10  -1 28.1035 3.18304   7 
   7 -10   1 15.1208 3.16782   6 
   7 -10   1 27.7954 3.99253   1 
  -8  10  -1 45.0004 4.82011   1 
  -8  10  -1 46.7693 3.94097   7 
   8 -10   1 38.8452 4.55182   1 
   8 -10   1 38.7757 4.22500   6 
  -9  10  -1 3.09793 2.78448   1 
   9 -10   1 -0.2043 2.75363   1 
   9 -10   1 -1.0859 1.74032   6 
 -10  10  -1 -2.7035 2.36961   1 
  10 -10   1 1.80751 2.19213   6 
  10 -10   1 1.87696 2.94269   1 
 -11  10  -1 117.755 7.71050   1 
  11 -10   1 110.992 5.97495   6 
  11 -10   1 105.418 7.61319   1 
 -12  10  -1 12.9597 4.19510   1 
  12 -10   1 12.5182 3.95410   1 
 -13  10  -1 3.81547 3.77113   1 
  13 -10   1 4.48065 3.60264   1 
 -14  10  -1 23.0627 5.20366   1 
  14 -10   1 21.9253 4.87123   1 
 -15  10  -1 21.4052 5.36556   1 
  15 -10   1 20.1129 5.07649   1 
 -16  10  -1 27.2902 6.44420   1 
 -17  10  -1 12.7822 5.89257   1 
 -18  10  -1 37.0647 7.45098   1 
 -19  10  -1 -0.3689 5.68242   1 
  11   9  -1 10.6321 4.98165   7 
 -11  -9   1 12.7132 4.91731   1 
  10   9  -1 32.9650 5.40972   7 
 -10  -9   1 34.1961 5.82130   1 
   9   9  -1 84.3404 7.19044   7 
  -9  -9   1 68.3466 7.36598   1 
  -9  -9   1 74.7669 7.30914   1 
   8   9  -1 10.6338 3.73592   7 
  -8  -9   1 5.90316 3.81590   1 
  -8  -9   1 6.22481 3.99459   1 
   7   9  -1 33.7040 6.05525   5 
   7   9  -1 33.2771 4.57258   7 
  -7  -9   1 36.6302 5.28082   6 
  -7  -9   1 26.5280 4.87937   1 
   6   9  -1 92.0763 6.44822   7 
   6   9  -1 73.1024 5.79557   7 
   6   9  -1 82.4326 7.30423   5 
  -6  -9   1 89.2946 7.02899   6 
  -6  -9   1 75.3994 6.59112   1 
   5   9  -1 73.1997 5.39333   7 
   5   9  -1 75.6265 5.69536   2 
   5   9  -1 82.7218 6.90853   5 
   5   9  -1 73.0126 5.40616   7 
  -5  -9   1 62.0499 5.87907   1 
  -5  -9   1 73.4066 6.43030   6 
   4   9  -1 79.0558 8.53880   2 
   4   9  -1 72.5291 5.29884   2 
   4   9  -1 76.9008 5.14213   7 
   4   9  -1 64.6240 5.04123   7 
   4   9  -1 66.5608 6.10211   5 
  -4  -9   1 77.8161 6.20528   1 
  -4  -9   1 65.6756 5.93325   6 
   3   9  -1 14.6450 3.44401   5 
   3   9  -1 11.9773 2.61426   7 
   3   9  -1 12.4791 2.66280   2 
   3   9  -1 13.7115 2.80950   2 
   3   9  -1 12.3568 2.61414   2 
  -3  -9   1 11.4906 3.14402   1 
  -3  -9   1 18.5356 3.51182   6 
   2   9  -1 12.2344 2.77062   1 
   2   9  -1 13.3486 3.13682   5 
   2   9  -1 13.4622 2.42070   7 
   2   9  -1 15.3619 2.74430   2 
   2   9  -1 18.8128 2.93768   2 
  -2  -9   1 17.3609 3.10964   1 
  -2  -9   1 14.1498 3.29016   6 
   1   9  -1 12.4230 2.55949   2 
   1   9  -1 17.4938 2.73245   2 
   1   9  -1 11.1552 2.30213   7 
   1   9  -1 13.6378 2.63982   1 
   1   9  -1 17.5905 3.24340   5 
  -1  -9   1 15.6351 3.17953   1 
  -1  -9   1 9.91727 2.85206   6 
   0   9  -1 -0.1468 1.84645   5 
   0   9  -1 -0.5886 1.50492   7 
   0   9  -1 2.22298 1.63861   2 
   0   9  -1 -0.4629 1.48948   2 
   0   9  -1 -0.7237 1.72544   1 
   0  -9   1 2.04934 2.20444   1 
   0  -9   1 -0.5753 2.20226   6 
  -1   9  -1 163.034 6.95255   2 
  -1   9  -1 152.179 6.78965   2 
  -1   9  -1 163.126 7.25908   1 
  -1   9  -1 150.990 6.36829   7 
  -1   9  -1 167.807 7.77066   5 
   1  -9   1 164.910 7.47453   1 
   1  -9   1 145.537 7.60506   6 
  -2   9  -1 15.1244 2.31768   7 
  -2   9  -1 16.0048 2.49001   2 
  -2   9  -1 11.9856 2.54839   1 
  -2   9  -1 12.1637 2.31801   2 
  -2   9  -1 15.1659 2.76193   5 
   2  -9   1 12.8215 2.72795   1 
   2  -9   1 13.8304 2.91390   6 
  -3   9  -1 -1.5517 1.17574   2 
  -3   9  -1 1.42159 1.88793   5 
  -3   9  -1 -0.9110 1.38778   7 
  -3   9  -1 -2.0453 1.49054   1 
  -3   9  -1 -0.8011 1.35496   2 
   3  -9   1 -0.3464 1.92531   6 
   3  -9   1 1.15045 1.94411   1 
  -4   9  -1 1.56428 1.42266   2 
  -4   9  -1 1.23518 1.91548   5 
  -4   9  -1 2.46154 1.55083   2 
  -4   9  -1 2.15147 1.57811   7 
  -4   9  -1 0.76027 1.69966   1 
   4  -9   1 1.10324 1.89181   1 
   4  -9   1 1.09643 2.06808   6 
  -5   9  -1 4.54728 1.67834   2 
  -5   9  -1 6.30546 1.85772   7 
  -5   9  -1 6.15884 2.21773   5 
  -5   9  -1 7.24817 2.08261   2 
  -5   9  -1 4.43695 2.11838   1 
   5  -9   1 6.59143 2.32620   6 
   5  -9   1 4.65484 2.35832   1 
  -6   9  -1 179.260 7.06322   7 
  -6   9  -1 173.215 7.91436   5 
  -6   9  -1 180.385 7.52012   2 
  -6   9  -1 183.614 8.08622   1 
   6  -9   1 177.900 8.05299   1 
   6  -9   1 181.511 7.86613   6 
  -7   9  -1 42.4507 4.39604   1 
  -7   9  -1 46.9094 3.65859   7 
   7  -9   1 39.0955 4.30156   1 
   7  -9   1 43.5529 1.82815   3 
   7  -9   1 43.9314 4.07634   6 
   7  -9   1 47.6656 3.71191   7 
  -8   9  -1 30.6872 3.16968   7 
  -8   9  -1 29.5057 4.07338   1 
   8  -9   1 33.2742 3.19366   7 
   8  -9   1 30.8025 1.99764   3 
   8  -9   1 28.1340 3.34473   6 
   8  -9   1 31.8027 4.05195   1 
  -9   9  -1 36.6661 4.42886   1 
   9  -9   1 41.2828 3.95934   6 
   9  -9   1 35.4630 4.45882   1 
   9  -9   1 35.2211 3.49173   7 
 -10   9  -1 30.2724 4.43977   1 
  10  -9   1 19.2584 3.91555   7 
  10  -9   1 32.6820 3.51992   6 
  10  -9   1 26.0024 4.14618   1 
 -11   9  -1 210.819 10.5222   1 
  11  -9   1 224.989 8.49813   6 
  11  -9   1 218.773 10.5076   1 
 -12   9  -1 17.3872 4.33219   1 
  12  -9   1 15.0004 3.84836   1 
 -13   9  -1 10.3338 4.13078   1 
  13  -9   1 6.28672 3.61303   1 
 -14   9  -1 32.7792 5.64308   1 
  14  -9   1 40.5558 5.98074   1 
 -15   9  -1 53.5897 7.03763   1 
  15  -9   1 55.6529 7.10048   1 
 -16   9  -1 8.05980 4.98933   1 
 -17   9  -1 0.34429 4.72254   1 
 -18   9  -1 28.1324 7.00048   1 
 -19   9  -1 0.65996 5.46554   1 
  12   8  -1 11.0404 4.99595   7 
 -12  -8   1 10.1815 4.90416   1 
  11   8  -1 69.1326 7.13221   7 
 -11  -8   1 69.7314 7.58623   1 
  10   8  -1 35.6705 5.48466   7 
 -10  -8   1 47.3260 6.17111   1 
   9   8  -1 102.177 7.58942   7 
  -9  -8   1 95.0347 7.87944   1 
  -9  -8   1 104.423 8.29909   1 
   8   8  -1 13.4277 3.71695   7 
   8   8  -1 11.7069 4.68749   5 
  -8  -8   1 19.3989 4.19423   1 
  -8  -8   1 11.4296 3.73059   1 
   7   8  -1 26.9215 4.00517   7 
   7   8  -1 32.7358 4.87963   5 
  -7  -8   1 33.8413 4.46766   6 
  -7  -8   1 28.4581 4.36707   1 
   6   8  -1 122.689 7.71046   5 
   6   8  -1 121.251 7.05763   2 
   6   8  -1 142.567 6.99652   7 
  -6  -8   1 125.169 7.44390   1 
  -6  -8   1 131.502 7.26859   6 
   5   8  -1 10.3483 2.49271   2 
   5   8  -1 20.2740 3.10586   7 
   5   8  -1 18.0466 3.69029   5 
   5   8  -1 16.7297 2.95838   2 
  -5  -8   1 15.8390 3.34820   1 
  -5  -8   1 15.2168 3.22220   6 
   4   8  -1 32.2491 4.26770   5 
   4   8  -1 38.4827 3.90843   2 
   4   8  -1 34.0797 3.70059   2 
   4   8  -1 33.0750 3.37575   7 
  -4  -8   1 39.9650 4.41825   6 
  -4  -8   1 34.7607 4.31703   1 
   3   8  -1 126.921 6.12781   2 
   3   8  -1 131.940 6.37838   1 
   3   8  -1 121.315 5.72060   7 
   3   8  -1 104.021 5.48283   7 
   3   8  -1 116.674 5.91142   2 
   3   8  -1 116.061 6.65617   5 
  -3  -8   1 124.824 6.68845   6 
  -3  -8   1 115.687 6.47308   1 
   2   8  -1 87.4781 4.64010   7 
   2   8  -1 93.8036 5.09144   2 
   2   8  -1 93.6894 5.02511   2 
   2   8  -1 97.6411 5.29956   1 
   2   8  -1 79.2069 5.41719   5 
   2   8  -1 84.5469 4.86040   2 
  -2  -8   1 95.5341 5.71969   6 
  -2  -8   1 95.7859 5.51477   1 
   1   8  -1 11.6187 2.13664   2 
   1   8  -1 7.29545 1.77201   2 
   1   8  -1 6.92461 2.28606   5 
   1   8  -1 5.15165 1.95606   1 
   1   8  -1 5.55987 1.66623   7 
  -1  -8   1 5.40904 2.15836   1 
  -1  -8   1 5.78169 2.52039   6 
   0   8  -1 2.33181 1.42846   7 
   0   8  -1 2.12275 1.86354   5 
   0   8  -1 1.33172 1.26595   2 
   0   8  -1 1.03375 1.59132   1 
   0   8  -1 1.17077 1.30736   2 
   0  -8   1 0.91789 1.77325   1 
   0  -8   1 -0.3440 1.86354   6 
  -1   8  -1 14.6274 2.19375   2 
  -1   8  -1 8.08161 2.16555   5 
  -1   8  -1 10.2767 1.83836   7 
  -1   8  -1 7.30520 2.16772   1 
  -1   8  -1 9.33112 1.77857   2 
   1  -8   1 9.13689 2.42192   6 
   1  -8   1 6.14928 2.00322   1 
  -2   8  -1 18.7244 2.58897   1 
  -2   8  -1 16.2826 2.09398   7 
  -2   8  -1 21.6380 2.88279   5 
  -2   8  -1 18.2570 2.35286   2 
  -2   8  -1 22.6581 2.57114   2 
   2  -8   1 22.3535 2.89352   1 
   2  -8   1 16.3314 2.84151   6 
  -3   8  -1 8.46165 2.07993   1 
  -3   8  -1 4.72489 1.49830   7 
  -3   8  -1 4.94801 1.55038   2 
  -3   8  -1 4.51324 1.62897   2 
  -3   8  -1 4.74528 1.90816   5 
   3  -8   1 3.95045 1.98187   6 
   3  -8   1 2.48951 1.80926   1 
  -4   8  -1 8.55103 1.87538   2 
  -4   8  -1 8.27709 1.74534   7 
  -4   8  -1 8.00748 1.73154   2 
  -4   8  -1 5.69830 1.98946   5 
  -4   8  -1 8.15849 2.08489   1 
   4  -8   1 5.06943 2.07213   1 
   4  -8   1 5.16495 2.03345   6 
  -5   8  -1 13.8999 2.46622   1 
  -5   8  -1 19.1584 2.39063   2 
  -5   8  -1 11.1553 1.91761   7 
  -5   8  -1 15.1753 2.56722   5 
   5  -8   1 18.3503 2.89910   1 
   5  -8   1 13.4140 2.50730   6 
   5  -8   1 12.9358 0.86553   3 
  -6   8  -1 -0.2612 1.71985   1 
  -6   8  -1 3.39690 1.43852   7 
   6  -8   1 2.98022 1.73311   6 
   6  -8   1 2.08070 0.71361   3 
   6  -8   1 3.52128 2.00317   1 
   6  -8   1 3.56076 1.38347   7 
  -7   8  -1 488.478 14.9820   7 
  -7   8  -1 474.817 16.2625   1 
   7  -8   1 501.817 15.0426   7 
   7  -8   1 509.356 16.3438   1 
   7  -8   1 482.855 15.5823   6 
  -8   8  -1 -0.3843 2.08447   1 
  -8   8  -1 -0.2740 1.35176   7 
   8  -8   1 0.05477 1.57607   7 
   8  -8   1 0.80853 2.06563   1 
   8  -8   1 -0.4751 1.56419   6 
  -9   8  -1 195.180 9.02045   1 
   9  -8   1 194.606 8.98361   1 
   9  -8   1 199.818 7.77069   7 
   9  -8   1 186.800 7.58366   6 
 -10   8  -1 138.899 7.92991   1 
  10  -8   1 134.972 6.49826   7 
  10  -8   1 145.500 7.89878   1 
  10  -8   1 148.693 6.15339   6 
 -11   8  -1 155.993 8.39984   1 
  11  -8   1 154.722 7.17246   7 
  11  -8   1 143.836 8.22531   1 
  11  -8   1 144.026 6.04143   6 
 -12   8  -1 14.1276 3.96072   1 
  12  -8   1 3.28567 2.43259   7 
  12  -8   1 6.96356 3.37024   1 
 -13   8  -1 50.9459 6.10184   1 
  13  -8   1 49.8949 5.87591   1 
 -14   8  -1 70.8300 7.33968   1 
  14  -8   1 76.1513 7.32177   1 
 -15   8  -1 2.16062 3.79350   1 
  15  -8   1 1.86167 3.93191   1 
 -16   8  -1 57.0438 7.69560   1 
 -17   8  -1 6.53121 4.97824   1 
 -18   8  -1 84.0364 9.54469   1 
 -19   8  -1 4.15262 5.34217   1 
  12   7  -1 10.8929 4.76927   7 
 -12  -7   1 11.4472 4.65826   1 
  11   7  -1 55.6302 6.19361   7 
 -11  -7   1 58.2497 6.81422   1 
  10   7  -1 61.7107 6.03646   7 
 -10  -7   1 58.5801 6.36203   1 
   9   7  -1 27.5642 4.21064   7 
   9   7  -1 29.5249 5.57210   5 
  -9  -7   1 41.9019 5.17523   1 
   8   7  -1 16.8049 3.88746   5 
   8   7  -1 22.6502 3.70865   7 
  -8  -7   1 25.0326 4.45816   1 
  -8  -7   1 27.8823 4.35841   1 
   7   7  -1 1.70782 2.09882   2 
   7   7  -1 -1.7267 2.21276   7 
   7   7  -1 0.07700 2.56992   5 
  -7  -7   1 -1.6424 2.28213   6 
  -7  -7   1 0.87873 2.47743   1 
   6   7  -1 46.8846 5.10610   5 
   6   7  -1 40.0089 3.97957   2 
   6   7  -1 50.9163 4.36607   7 
   6   7  -1 46.6488 4.35740   2 
  -6  -7   1 38.9698 4.52835   1 
  -6  -7   1 47.9772 4.58236   6 
   5   7  -1 -0.7838 1.57272   2 
   5   7  -1 0.75957 1.82753   7 
   5   7  -1 0.61986 1.69798   2 
   5   7  -1 2.79547 2.59786   5 
  -5  -7   1 1.44521 2.04861   6 
  -5  -7   1 1.38825 2.14321   1 
   4   7  -1 473.643 15.7781   5 
   4   7  -1 459.356 14.6965   2 
   4   7  -1 425.977 14.6494   1 
   4   7  -1 452.369 14.5573   2 
   4   7  -1 445.588 14.0937   7 
  -4  -7   1 440.057 15.1244   1 
  -4  -7   1 453.610 15.2447   6 
   3   7  -1 88.7744 4.76912   2 
   3   7  -1 86.8769 5.39566   5 
   3   7  -1 82.4869 4.83448   1 
   3   7  -1 86.8159 4.49989   7 
   3   7  -1 94.7481 4.79186   2 
  -3  -7   1 97.7899 5.60328   6 
  -3  -7   1 91.8246 5.27969   1 
   2   7  -1 47.8659 4.18704   5 
   2   7  -1 49.8419 3.45721   2 
   2   7  -1 43.1348 3.20783   7 
   2   7  -1 49.9010 3.43039   2 
   2   7  -1 54.2214 3.25661   7 
   2   7  -1 51.1548 3.70741   1 
  -2  -7   1 44.6122 4.13687   6 
  -2  -7   1 51.0392 4.20349   1 
   1   7  -1 152.355 6.05841   2 
   1   7  -1 139.969 5.96592   2 
   1   7  -1 158.482 6.41232   1 
   1   7  -1 148.962 5.70667   7 
   1   7  -1 152.257 6.01190   2 
   1   7  -1 140.695 6.58286   5 
  -1  -7   1 152.037 6.79442   6 
  -1  -7   1 141.773 6.43643   1 
   0   7  -1 20.3986 2.18642   7 
   0   7  -1 15.3469 1.97245   2 
   0   7  -1 16.5649 2.36397   1 
   0   7  -1 21.4367 2.33571   2 
   0   7  -1 20.1456 2.70136   5 
   0  -7   1 14.7400 2.59706   6 
   0  -7   1 17.6165 2.51049   1 
  -1   7  -1 205.701 7.44480   2 
  -1   7  -1 205.858 7.12356   7 
  -1   7  -1 206.090 7.82518   1 
  -1   7  -1 202.249 7.96568   5 
  -1   7  -1 209.656 7.53224   2 
   1  -7   1 206.763 8.24377   6 
   1  -7   1 223.599 8.03772   1 
   1  -7   1 213.839 7.96500   5 
  -2   7  -1 148.145 5.55147   7 
  -2   7  -1 156.038 6.42840   5 
  -2   7  -1 147.904 5.87928   2 
  -2   7  -1 150.666 5.94124   2 
  -2   7  -1 155.630 6.31494   1 
   2  -7   1 149.578 6.55743   6 
   2  -7   1 148.359 6.25147   1 
   2  -7   1 149.598 6.25346   5 
  -3   7  -1 94.4604 4.47204   2 
  -3   7  -1 94.8789 4.82263   5 
  -3   7  -1 102.540 4.52642   2 
  -3   7  -1 100.491 4.87280   1 
  -3   7  -1 92.5349 4.09569   7 
   3  -7   1 90.8666 4.64196   5 
   3  -7   1 89.2670 4.81164   6 
  -4   7  -1 2.07871 1.17221   7 
  -4   7  -1 1.31260 1.42321   1 
  -4   7  -1 0.00081 1.38333   5 
  -4   7  -1 0.46001 1.01526   2 
  -4   7  -1 1.87371 1.26506   2 
   4  -7   1 1.42708 0.53356   3 
   4  -7   1 3.65048 1.63186   1 
   4  -7   1 2.24224 1.52684   6 
   4  -7   1 0.59574 1.35229   5 
  -5   7  -1 35.8283 3.30976   5 
  -5   7  -1 36.2479 2.78623   7 
  -5   7  -1 39.8397 3.22879   2 
  -5   7  -1 28.2112 3.05459   1 
   5  -7   1 39.2214 3.52748   1 
   5  -7   1 33.0478 3.15277   6 
   5  -7   1 37.0355 1.63677   3 
  -6   7  -1 15.9671 2.66039   1 
  -6   7  -1 17.1981 2.12357   7 
   6  -7   1 15.5919 2.67047   1 
   6  -7   1 11.8101 1.81734   7 
   6  -7   1 13.1011 2.09272   6 
  -7   7  -1 402.488 13.7812   1 
  -7   7  -1 401.863 12.5758   7 
   7  -7   1 401.951 12.6848   7 
   7  -7   1 423.133 12.9972   6 
   7  -7   1 406.348 13.8400   1 
  -8   7  -1 6.04288 2.37115   1 
  -8   7  -1 2.23108 1.41657   7 
   8  -7   1 3.27196 2.22311   1 
   8  -7   1 1.12453 1.55576   7 
   8  -7   1 3.34137 1.51929   6 
  -9   7  -1 190.738 8.76413   1 
   9  -7   1 191.765 7.72922   7 
   9  -7   1 200.432 8.76573   1 
   9  -7   1 215.764 7.43275   6 
 -10   7  -1 5.77907 2.71655   1 
  10  -7   1 0.57009 1.26458   6 
  10  -7   1 -0.0337 1.80099   7 
  10  -7   1 3.87759 2.62098   1 
 -11   7  -1 398.217 14.8072   1 
  11  -7   1 398.345 14.7570   1 
  11  -7   1 379.757 13.3612   7 
 -12   7  -1 87.0978 7.18034   1 
  12  -7   1 75.6253 6.57441   1 
  12  -7   1 89.1313 6.21587   7 
 -13   7  -1 29.2207 5.00869   1 
  13  -7   1 39.4109 5.25425   1 
  13  -7   1 31.2934 4.11808   7 
 -14   7  -1 88.0119 7.99960   1 
  14  -7   1 79.5761 7.41495   1 
  14  -7   1 81.6983 6.53540   7 
 -15   7  -1 9.53362 4.40979   1 
 -16   7  -1 227.495 12.7837   1 
 -17   7  -1 8.03949 4.80651   1 
 -18   7  -1 63.0233 8.48628   1 
  13   6  -1 44.2227 6.16351   7 
 -13  -6   1 36.5934 6.14298   1 
  12   6  -1 16.9953 4.69077   7 
 -12  -6   1 11.1397 4.56487   1 
  11   6  -1 22.2436 4.45181   7 
 -11  -6   1 20.2242 4.65540   1 
  10   6  -1 9.15815 3.49375   7 
 -10  -6   1 9.94091 3.74965   1 
   9   6  -1 0.01395 2.56052   7 
   9   6  -1 -2.8144 2.69285   5 
  -9  -6   1 -2.0514 2.76244   1 
   8   6  -1 4.83709 2.51480   2 
   8   6  -1 5.30164 2.45063   7 
   8   6  -1 0.97228 2.94277   5 
  -8  -6   1 3.61581 2.75018   1 
  -8  -6   1 4.39220 2.76578   1 
   7   6  -1 0.36441 1.86704   2 
   7   6  -1 0.31123 2.06231   7 
   7   6  -1 -1.0939 2.67407   5 
   7   6  -1 -0.3939 1.86312   2 
  -7  -6   1 0.97361 2.37365   1 
  -7  -6   1 2.67950 2.17487   6 
   6   6  -1 131.027 6.37239   2 
   6   6  -1 123.494 7.06708   5 
   6   6  -1 127.717 6.38277   2 
   6   6  -1 129.144 6.03686   7 
  -6  -6   1 121.244 6.73063   1 
  -6  -6   1 138.290 6.46918   6 
   5   6  -1 -0.1030 1.48890   2 
   5   6  -1 2.90985 2.31252   5 
   5   6  -1 4.18635 1.73620   2 
   5   6  -1 1.97423 1.69162   7 
   5   6  -1 0.75833 1.69494   1 
  -5  -6   1 4.42730 2.16550   6 
  -5  -6   1 3.26324 2.12744   1 
   4   6  -1 2.35021 1.56213   1 
   4   6  -1 3.06235 2.03272   5 
   4   6  -1 2.85818 1.46543   7 
   4   6  -1 0.54122 1.31682   2 
   4   6  -1 1.91675 1.35439   2 
  -4  -6   1 0.70876 1.58483   6 
  -4  -6   1 0.61214 1.76739   1 
   3   6  -1 348.000 11.2980   2 
   3   6  -1 350.714 11.5926   1 
   3   6  -1 349.479 12.1512   5 
   3   6  -1 351.990 11.2542   2 
   3   6  -1 345.284 10.8965   7 
  -3  -6   1 348.198 11.9316   6 
  -3  -6   1 348.036 11.8057   1 
   2   6  -1 157.106 6.79262   5 
   2   6  -1 155.943 5.79189   7 
   2   6  -1 161.652 6.13007   2 
   2   6  -1 159.949 6.06348   2 
   2   6  -1 168.547 6.50402   1 
  -2  -6   1 161.960 6.58859   1 
  -2  -6   1 153.146 6.67650   6 
   1   6  -1 197.234 7.21997   1 
   1   6  -1 193.700 7.51198   5 
   1   6  -1 194.782 6.54722   7 
   1   6  -1 184.273 6.86081   2 
   1   6  -1 193.113 6.82435   2 
   1   6  -1 193.681 6.84495   2 
  -1  -6   1 200.785 7.52114   5 
  -1  -6   1 194.393 7.30776   1 
  -1  -6   1 189.036 7.52076   6 
   0   6  -1 5.86881 1.27758   2 
   0   6  -1 10.4501 1.51684   7 
   0   6  -1 9.00570 1.88073   5 
   0   6  -1 8.51932 1.72845   1 
   0   6  -1 5.91710 1.29735   2 
   0  -6   1 9.14877 1.99922   6 
   0  -6   1 8.70699 1.79349   1 
   0  -6   1 11.2523 1.98930   5 
  -1   6  -1 173.954 6.63690   1 
  -1   6  -1 185.780 6.10778   7 
  -1   6  -1 176.164 6.36282   2 
  -1   6  -1 191.406 6.45646   2 
  -1   6  -1 185.481 6.91292   5 
   1  -6   1 165.721 6.88655   6 
   1  -6   1 180.498 6.77220   5 
   1  -6   1 170.932 6.66824   1 
  -2   6  -1 413.241 12.5309   1 
  -2   6  -1 410.268 11.7886   7 
  -2   6  -1 401.040 12.1139   2 
  -2   6  -1 421.347 12.1837   2 
  -2   6  -1 375.137 12.3997   5 
   2  -6   1 397.949 12.7245   6 
   2  -6   1 398.245 11.0907   3 
   2  -6   1 389.591 12.4056   5 
   2  -6   1 380.777 12.3793   1 
  -3   6  -1 220.120 7.74075   1 
  -3   6  -1 213.888 7.72340   5 
  -3   6  -1 220.185 7.11854   7 
  -3   6  -1 211.761 7.38477   2 
  -3   6  -1 222.596 7.44079   2 
   3  -6   1 217.718 7.69871   5 
   3  -6   1 216.106 7.76843   1 
   3  -6   1 206.288 7.74051   6 
   3  -6   1 209.955 6.10050   3 
  -4   6  -1 10.4741 2.03480   1 
  -4   6  -1 8.52250 1.80777   5 
  -4   6  -1 9.25823 1.54155   2 
  -4   6  -1 14.6313 1.68370   7 
   4  -6   1 13.3339 0.98758   3 
   4  -6   1 15.6920 2.08557   5 
   4  -6   1 11.3540 2.07904   1 
   4  -6   1 10.7585 1.87219   6 
  -5   6  -1 441.924 14.0490   1 
  -5   6  -1 446.552 13.1480   7 
   5  -6   1 438.774 14.0208   1 
   5  -6   1 451.174 13.6895   6 
   5  -6   1 438.796 13.8357   5 
   5  -6   1 449.796 13.1542   7 
  -6   6  -1 -1.9541 1.32345   1 
  -6   6  -1 3.03873 1.21361   7 
   6  -6   1 -0.2797 1.34776   5 
   6  -6   1 -0.3517 1.53567   1 
   6  -6   1 -1.3766 1.13370   6 
   6  -6   1 0.40411 1.08015   7 
  -7   6  -1 355.186 12.2729   1 
  -7   6  -1 359.342 11.4454   7 
   7  -6   1 364.908 11.3263   7 
   7  -6   1 360.986 11.1840   6 
   7  -6   1 346.387 12.1862   1 
  -8   6  -1 22.8946 3.18412   1 
   8  -6   1 14.5503 2.23161   7 
   8  -6   1 12.6178 1.84552   6 
   8  -6   1 10.0566 2.43349   1 
   8  -6   1 14.4358 2.40689   2 
  -9   6  -1 239.594 9.85749   1 
   9  -6   1 255.729 7.98890   6 
   9  -6   1 242.402 9.76806   1 
   9  -6   1 243.855 8.87941   7 
   9  -6   1 241.837 9.30522   2 
 -10   6  -1 232.550 10.0456   1 
  10  -6   1 255.335 10.3014   1 
  10  -6   1 247.529 9.14880   7 
  10  -6   1 234.184 7.50171   6 
 -11   6  -1 300.188 9.77064   4 
 -11   6  -1 301.521 12.0947   1 
  11  -6   1 274.677 10.6953   7 
  11  -6   1 311.864 11.9895   1 
 -12   6  -1 147.709 8.35828   1 
  12  -6   1 146.905 7.35392   7 
  12  -6   1 165.411 8.63837   1 
 -13   6  -1 99.3574 7.29679   1 
  13  -6   1 99.4173 6.49143   7 
  13  -6   1 108.853 7.35943   1 
 -14   6  -1 109.178 9.09502   1 
  14  -6   1 109.442 8.50608   1 
  14  -6   1 111.210 7.63143   7 
 -15   6  -1 5.49096 3.81936   1 
  15  -6   1 3.36081 3.58526   7 
 -16   6  -1 103.695 9.42410   1 
 -17   6  -1 -0.9869 4.52545   1 
 -18   6  -1 66.5537 8.79200   1 
  14   5  -1 22.9730 5.37318   7 
 -14  -5   1 17.1528 5.27514   1 
  13   5  -1 6.15508 4.09541   7 
 -13  -5   1 -0.9185 3.99227   1 
  12   5  -1 6.44904 3.81953   7 
 -12  -5   1 0.82004 3.63652   1 
  11   5  -1 19.9234 4.09667   7 
 -11  -5   1 19.0347 4.38421   1 
  10   5  -1 16.4254 3.62418   7 
  10   5  -1 11.9257 3.87522   5 
 -10  -5   1 7.00592 3.47853   1 
   9   5  -1 -0.5029 2.95547   5 
   9   5  -1 0.98029 2.33472   2 
   9   5  -1 3.78355 2.48515   7 
  -9  -5   1 -1.9809 2.47469   1 
   8   5  -1 20.5023 3.20651   2 
   8   5  -1 21.6950 3.03032   7 
   8   5  -1 12.3327 3.59350   5 
   8   5  -1 13.8468 2.96924   2 
  -8  -5   1 19.1898 3.34939   6 
  -8  -5   1 16.9882 3.31867   1 
  -8  -5   1 15.4351 3.39174   1 
   7   5  -1 0.67582 1.72977   2 
   7   5  -1 0.81086 1.66151   2 
   7   5  -1 -0.2494 1.73525   7 
   7   5  -1 0.75537 2.58255   5 
  -7  -5   1 -0.3911 2.14972   1 
  -7  -5   1 0.82759 1.76782   6 
  -7  -5   1 2.90842 2.23256   1 
   6   5  -1 445.278 13.6653   7 
   6   5  -1 442.195 14.2331   2 
   6   5  -1 436.465 14.2791   1 
   6   5  -1 435.270 14.1023   2 
   6   5  -1 440.615 15.2708   5 
  -6  -5   1 418.921 14.5635   1 
  -6  -5   1 436.918 14.0167   6 
   5   5  -1 54.6168 3.57151   2 
   5   5  -1 53.6415 3.40745   7 
   5   5  -1 46.3928 4.23339   5 
   5   5  -1 54.2072 3.62110   2 
   5   5  -1 50.8612 3.74070   1 
  -5  -5   1 50.6422 3.67399   6 
  -5  -5   1 58.4952 4.11768   1 
   4   5  -1 12.1186 2.43034   5 
   4   5  -1 14.7078 1.86625   7 
   4   5  -1 12.8519 1.82086   2 
   4   5  -1 14.2100 2.10753   1 
   4   5  -1 8.92217 1.58019   2 
  -4  -5   1 12.2952 2.10824   6 
  -4  -5   1 17.2141 2.49543   1 
   3   5  -1 68.5952 3.77970   1 
   3   5  -1 63.2831 3.22493   7 
   3   5  -1 69.2763 4.16421   5 
   3   5  -1 66.7021 3.48151   2 
   3   5  -1 69.1976 3.51817   2 
  -3  -5   1 68.8914 3.86928   6 
  -3  -5   1 77.0477 4.13531   1 
   2   5  -1 88.4495 3.78635   2 
   2   5  -1 81.8718 4.00329   1 
   2   5  -1 84.0024 3.74809   2 
   2   5  -1 85.7449 3.55913   7 
   2   5  -1 89.9561 4.44307   5 
  -2  -5   1 84.5383 4.18101   1 
  -2  -5   1 78.0310 4.15970   6 
   1   5  -1 579.305 16.5610   2 
   1   5  -1 607.894 17.0251   1 
   1   5  -1 564.651 16.5626   2 
   1   5  -1 583.307 16.3051   7 
   1   5  -1 592.067 17.3465   5 
  -1  -5   1 587.305 17.3835   6 
  -1  -5   1 581.001 17.2370   5 
  -1  -5   1 581.045 17.0789   1 
   0   5  -1 35.6403 2.04797   7 
   0   5  -1 31.2697 2.16428   2 
   0   5  -1 38.2593 2.50822   1 
   0   5  -1 31.8570 2.72156   5 
   0  -5   1 39.0018 2.80425   6 
   0  -5   1 35.9053 2.49728   1 
   0  -5   1 32.2557 2.67266   5 
  -1   5  -1 79.2249 3.37185   2 
  -1   5  -1 77.6670 3.73408   5 
  -1   5  -1 79.8193 3.42361   2 
  -1   5  -1 77.7122 3.14983   7 
  -1   5  -1 74.5510 3.54998   1 
   1  -5   1 75.3930 3.82865   6 
   1  -5   1 78.0492 3.70815   1 
   1  -5   1 80.9461 3.78458   5 
  -2   5  -1 57.9260 3.09990   1 
  -2   5  -1 53.5024 2.84823   2 
  -2   5  -1 67.6558 3.01934   2 
  -2   5  -1 62.2222 2.71388   7 
  -2   5  -1 65.6293 3.28572   5 
   2  -5   1 60.6039 3.22938   1 
   2  -5   1 62.2108 3.31321   6 
   2  -5   1 60.1487 2.19142   3 
   2  -5   1 53.4333 3.03297   5 
  -3   5  -1 589.745 16.8405   2 
  -3   5  -1 577.872 16.8028   2 
  -3   5  -1 598.623 17.1493   1 
  -3   5  -1 606.230 16.5196   7 
  -3   5  -1 579.855 17.1101   5 
   3  -5   1 588.429 17.1207   6 
   3  -5   1 600.352 15.7206   3 
   3  -5   1 592.221 17.1537   1 
   3  -5   1 580.655 17.0458   5 
  -4   5  -1 630.836 18.0933   7 
  -4   5  -1 631.336 18.7376   5 
  -4   5  -1 701.438 19.2796   2 
  -4   5  -1 664.874 18.9179   1 
   4  -5   1 635.324 18.8005   1 
   4  -5   1 653.372 18.6088   6 
   4  -5   1 633.848 18.7006   5 
  -5   5  -1 1662.76 45.1592   1 
  -5   5  -1 1659.12 44.2367   7 
   5  -5   1 1627.52 44.2799   7 
   5  -5   1 1666.72 44.9951   5 
   5  -5   1 1671.24 45.0956   1 
   5  -5   1 1676.43 44.4988   6 
  -6   5  -1 77.9837 4.28878   1 
   6  -5   1 75.2760 3.58543   7 
   6  -5   1 73.6927 4.03857   5 
   6  -5   1 67.3532 3.30768   6 
   6  -5   1 72.1991 4.23087   1 
   6  -5   1 75.4275 3.96631   2 
  -7   5  -1 1037.97 29.8442   1 
   7  -5   1 1016.60 28.8583   7 
   7  -5   1 1041.39 28.3461   6 
   7  -5   1 1051.32 29.3491   2 
   7  -5   1 1067.83 29.7875   1 
  -8   5  -1 6.59032 2.18862   1 
   8  -5   1 8.41190 1.83495   2 
   8  -5   1 7.75763 1.29445   6 
   8  -5   1 9.77849 2.36559   1 
   8  -5   1 10.6299 1.88098   7 
   8  -5   1 6.67568 1.77405   2 
  -9   5  -1 154.641 5.86505   4 
  -9   5  -1 151.402 7.47780   1 
   9  -5   1 162.445 7.04551   2 
   9  -5   1 163.880 5.17607   6 
   9  -5   1 175.675 7.66358   1 
   9  -5   1 166.011 6.63938   7 
   9  -5   1 156.595 6.91194   2 
 -10   5  -1 421.526 15.0146   1 
 -10   5  -1 434.178 12.7936   4 
  10  -5   1 398.642 14.1947   2 
  10  -5   1 439.634 14.9265   1 
  10  -5   1 431.549 13.8573   7 
 -11   5  -1 65.4674 3.63187   4 
 -11   5  -1 73.2947 6.17767   1 
  11  -5   1 83.8824 5.80267   1 
  11  -5   1 72.9796 4.80051   7 
 -12   5  -1 99.1781 6.83413   1 
  12  -5   1 103.081 6.90478   1 
  12  -5   1 95.4005 5.97397   7 
 -13   5  -1 3.49574 3.30408   1 
  13  -5   1 0.79446 2.52012   7 
  13  -5   1 -2.6652 2.79101   1 
 -14   5  -1 60.7796 6.60722   1 
  14  -5   1 64.7919 5.80280   7 
 -15   5  -1 1.29002 3.79377   1 
  15  -5   1 -0.1976 3.45043   7 
 -16   5  -1 73.2970 8.16973   1 
 -17   5  -1 -3.6635 4.68046   1 
 -18   5  -1 21.3150 6.54930   1 
  15   4  -1 14.0916 5.22757   7 
 -15  -4   1 14.7046 5.28232   1 
  14   4  -1 30.6693 5.54242   7 
 -14  -4   1 37.9451 6.22925   1 
  13   4  -1 17.1211 4.61167   7 
 -13  -4   1 12.4868 4.43653   1 
  12   4  -1 5.32605 3.36068   7 
 -12  -4   1 2.82488 3.42398   1 
  11   4  -1 -2.7910 2.66240   7 
  11   4  -1 0.73691 2.99005   5 
 -11  -4   1 -1.5106 2.79176   1 
  10   4  -1 1.17587 2.77271   5 
  10   4  -1 1.53782 2.47081   2 
  10   4  -1 0.37832 2.44034   7 
 -10  -4   1 -1.2227 2.57554   1 
   9   4  -1 7.69408 2.48243   7 
   9   4  -1 7.32457 2.49642   2 
   9   4  -1 9.98198 2.64629   2 
   9   4  -1 5.49338 2.92174   5 
  -9  -4   1 8.73270 3.02878   1 
   8   4  -1 191.529 8.09074   2 
   8   4  -1 183.108 7.89380   2 
   8   4  -1 176.538 8.65040   5 
   8   4  -1 178.081 7.46386   7 
  -8  -4   1 184.884 6.97926   6 
  -8  -4   1 168.767 8.17822   1 
   7   4  -1 10.1191 2.21900   2 
   7   4  -1 4.36368 1.83672   7 
   7   4  -1 7.62637 1.90236   2 
   7   4  -1 3.46022 2.43048   5 
   7   4  -1 11.6627 2.35927   1 
  -7  -4   1 7.92910 2.37122   1 
  -7  -4   1 12.6536 2.87863   1 
  -7  -4   1 9.38751 2.03758   6 
   6   4  -1 208.366 7.56591   7 
   6   4  -1 228.070 8.28800   1 
   6   4  -1 219.082 8.03130   2 
   6   4  -1 206.061 8.76125   5 
   6   4  -1 215.002 8.05678   2 
  -6  -4   1 212.518 7.69010   6 
  -6  -4   1 215.573 8.50184   1 
   5   4  -1 0.63601 1.36471   1 
   5   4  -1 0.23479 0.93488   7 
   5   4  -1 -0.8228 1.02597   7 
   5   4  -1 -0.3436 1.59624   5 
   5   4  -1 1.17302 1.18446   2 
   5   4  -1 0.91117 1.13470   2 
  -5  -4   1 1.82533 1.51690   1 
  -5  -4   1 -0.6950 1.18077   6 
   4   4  -1 9.51591 1.53723   2 
   4   4  -1 7.01337 1.23436   7 
   4   4  -1 6.30281 1.51103   1 
   4   4  -1 6.50017 1.34955   2 
   4   4  -1 4.85869 1.76086   5 
   4   4  -1 5.79268 1.30284   7 
  -4  -4   1 5.84434 1.56678   6 
  -4  -4   1 4.01502 1.65197   1 
   3   4  -1 299.953 9.85684   5 
   3   4  -1 295.478 9.37461   1 
   3   4  -1 287.914 8.99685   2 
   3   4  -1 273.156 9.32380   7 
   3   4  -1 294.105 8.98165   2 
   3   4  -1 282.241 8.69319   7 
  -3  -4   1 294.446 9.47228   6 
  -3  -4   1 285.996 9.47657   1 
   2   4  -1 37.1822 2.91036   5 
   2   4  -1 36.4317 2.42302   1 
   2   4  -1 33.9780 1.97354   7 
   2   4  -1 39.2871 2.19140   2 
   2   4  -1 32.0145 2.06621   2 
  -2  -4   1 31.9153 2.62007   6 
  -2  -4   1 33.4752 2.65254   1 
   1   4  -1 349.693 9.59818   7 
   1   4  -1 327.637 9.74769   2 
   1   4  -1 336.792 10.1171   1 
   1   4  -1 335.795 10.4173   5 
   1   4  -1 325.956 9.75298   2 
  -1  -4   1 339.504 10.2259   1 
  -1  -4   1 331.411 10.3533   5 
  -1  -4   1 328.691 10.4176   6 
   0   4  -1 156.528 4.90039   7 
   0   4  -1 154.952 5.06030   2 
   0   4  -1 165.760 5.47214   1 
   0   4  -1 159.508 5.12186   2 
   0   4  -1 154.044 5.53390   5 
   0   4  -1 145.721 5.04422   2 
   0  -4   1 150.537 5.37939   1 
   0  -4   1 166.357 5.72932   6 
   0  -4   1 150.682 5.47631   5 
  -1   4  -1 647.971 17.6429   2 
  -1   4  -1 636.764 17.8830   1 
  -1   4  -1 647.564 17.9967   5 
  -1   4  -1 664.612 17.4112   7 
  -1   4  -1 648.655 17.6500   2 
   1  -4   1 639.912 18.1516   6 
   1  -4   1 613.342 17.8976   5 
   1  -4   1 635.896 17.1709   3 
   1  -4   1 627.239 17.8525   1 
  -2   4  -1 122.776 4.52223   1 
  -2   4  -1 123.570 4.09941   7 
  -2   4  -1 125.202 4.35556   2 
  -2   4  -1 126.451 4.34774   2 
  -2   4  -1 125.745 4.57992   5 
   2  -4   1 116.675 4.48003   1 
   2  -4   1 113.471 4.43203   5 
   2  -4   1 121.386 3.61299   3 
   2  -4   1 120.958 4.58665   6 
  -3   4  -1 1517.88 40.1567   7 
  -3   4  -1 1475.51 40.6793   1 
  -3   4  -1 1562.53 40.4990   2 
  -3   4  -1 1486.91 40.6520   5 
   3  -4   1 1519.30 40.5546   6 
   3  -4   1 1535.36 40.7559   1 
   3  -4   1 1530.80 40.7062   5 
  -4   4  -1 -0.2810 1.04482   1 
  -4   4  -1 0.31989 0.76845   7 
   4  -4   1 -0.2854 0.93704   5 
   4  -4   1 1.76712 1.23741   1 
   4  -4   1 -0.8106 0.81193   6 
   4  -4   1 0.75424 0.80656   7 
  -5   4  -1 1548.06 43.8939   1 
   5  -4   1 1654.95 43.0794   6 
   5  -4   1 1604.64 43.8915   1 
   5  -4   1 1652.91 43.6167   2 
   5  -4   1 1656.91 43.2697   7 
  -6   4  -1 60.5647 3.71672   1 
   6  -4   1 51.7605 2.48410   6 
   6  -4   1 56.1502 3.04534   7 
   6  -4   1 57.3947 3.23546   2 
   6  -4   1 52.1172 3.52710   1 
   6  -4   1 56.1443 3.30508   2 
  -7   4  -1 1025.72 29.0584   1 
   7  -4   1 1006.59 28.9682   1 
   7  -4   1 1043.97 28.6422   2 
   7  -4   1 1009.20 27.1657   6 
   7  -4   1 1008.66 28.5578   2 
  -8   4  -1 52.3572 2.79280   4 
   8  -4   1 51.7887 3.62083   2 
   8  -4   1 56.8797 4.42812   1 
   8  -4   1 50.3806 2.02116   6 
   8  -4   1 49.3947 3.27821   7 
   8  -4   1 53.3834 3.62616   2 
  -9   4  -1 74.9056 3.44959   4 
  -9   4  -1 76.3140 5.16711   1 
   9  -4   1 75.6576 4.85495   1 
   9  -4   1 72.8567 4.23252   7 
   9  -4   1 78.6197 4.55306   2 
   9  -4   1 76.9172 4.63736   2 
 -10   4  -1 174.128 8.11004   1 
 -10   4  -1 163.431 5.77371   4 
  10  -4   1 151.291 7.22608   2 
  10  -4   1 153.139 7.48494   1 
  10  -4   1 161.397 6.87082   7 
  10  -4   1 160.194 8.26060   2 
 -11   4  -1 51.7906 5.19891   1 
  11  -4   1 49.2646 4.43493   7 
  11  -4   1 54.8912 5.23584   1 
 -12   4  -1 147.836 8.20871   1 
  12  -4   1 151.403 8.18830   1 
  12  -4   1 133.156 7.05555   7 
 -13   4  -1 17.0480 4.20981   1 
  13  -4   1 9.32772 3.09171   7 
  13  -4   1 12.8537 3.73486   1 
 -14   4  -1 135.587 8.94418   1 
  14  -4   1 142.497 8.06982   7 
 -15   4  -1 1.07493 3.86806   1 
  15  -4   1 5.12334 3.53127   7 
 -16   4  -1 19.7603 5.61901   1 
  16  -4   1 30.2241 5.84479   7 
 -17   4  -1 7.89638 5.36951   1 
 -18   4  -1 23.2305 6.52308   1 
  15   3  -1 1.90960 4.30698   7 
 -15  -3   1 2.30674 4.41328   1 
  14   3  -1 -1.7995 3.81736   7 
 -14  -3   1 2.35430 4.08237   1 
  13   3  -1 2.45826 3.60158   7 
 -13  -3   1 13.9732 4.29428   1 
  12   3  -1 32.2590 4.44276   7 
 -12  -3   1 34.8792 5.18313   1 
  11   3  -1 25.1303 3.93642   7 
 -11  -3   1 31.0817 4.64187   1 
  10   3  -1 42.6747 4.21456   7 
  10   3  -1 36.7738 4.11616   2 
 -10  -3   1 39.1966 4.70642   1 
   9   3  -1 56.6146 4.70380   2 
   9   3  -1 68.7824 4.75908   7 
   9   3  -1 64.2356 4.68652   2 
  -9  -3   1 55.9997 5.09141   1 
   8   3  -1 80.1473 4.90535   1 
   8   3  -1 74.8274 4.76905   2 
   8   3  -1 85.6967 4.64804   7 
   8   3  -1 77.1597 4.73460   2 
  -8  -3   1 72.6220 5.08714   1 
  -8  -3   1 79.7681 3.77798   6 
   7   3  -1 148.639 6.26006   2 
   7   3  -1 155.390 6.58617   1 
   7   3  -1 141.756 6.35055   2 
   7   3  -1 146.067 5.97882   7 
  -7  -3   1 154.060 5.63328   6 
  -7  -3   1 152.767 6.91553   1 
  -7  -3   1 140.546 6.69412   1 
   6   3  -1 287.605 9.90144   1 
   6   3  -1 289.011 9.62492   2 
   6   3  -1 288.197 9.73339   2 
   6   3  -1 272.560 9.22970   7 
   6   3  -1 328.003 10.5426   7 
  -6  -3   1 295.230 10.2340   1 
  -6  -3   1 289.478 9.26083   6 
  -6  -3   1 287.133 10.1684   1 
   5   3  -1 159.263 5.61603   7 
   5   3  -1 153.642 5.90178   2 
   5   3  -1 155.291 5.84044   2 
   5   3  -1 165.854 6.25887   1 
   5   3  -1 160.136 5.52425   7 
  -5  -3   1 161.630 6.40650   1 
  -5  -3   1 161.464 5.82875   6 
   4   3  -1 147.170 5.50242   1 
   4   3  -1 141.728 5.10226   2 
   4   3  -1 142.423 5.19582   2 
   4   3  -1 141.820 4.88981   7 
   4   3  -1 145.600 4.87434   7 
  -4  -3   1 139.010 5.25021   6 
  -4  -3   1 141.193 5.54845   1 
   3   3  -1 486.110 14.2040   5 
   3   3  -1 486.035 13.7456   1 
   3   3  -1 473.885 13.3434   2 
   3   3  -1 465.440 13.1167   7 
   3   3  -1 447.373 13.0823   7 
   3   3  -1 467.882 13.3856   2 
  -3  -3   1 477.655 13.7532   6 
  -3  -3   1 474.022 13.8411   1 
   2   3  -1 24.6578 1.53984   2 
   2   3  -1 29.3435 1.59969   2 
   2   3  -1 26.1334 2.18012   5 
   2   3  -1 25.9623 1.82851   1 
  -2  -3   1 22.8132 1.97341   6 
  -2  -3   1 26.2287 2.09762   1 
  -2  -3   1 28.1172 2.14340   1 
   1   3  -1 1367.20 37.0063   5 
   1   3  -1 1433.94 36.4445   2 
   1   3  -1 1420.93 36.4165   2 
   1   3  -1 1326.72 36.7105   1 
   1   3  -1 1408.87 36.2548   7 
  -1  -3   1 1386.04 37.0263   6 
  -1  -3   1 1351.23 36.7558   1 
  -1  -3   1 1372.54 36.9908   5 
  -1  -3   1 1378.24 36.7952   1 
   0   3  -1 2.11794 0.86266   5 
   0   3  -1 2.01838 0.71636   1 
   0   3  -1 2.93802 0.59741   2 
   0   3  -1 2.17162 0.57282   7 
   0   3  -1 2.37730 0.55885   7 
   0   3  -1 6.01184 0.77259   2 
   0   3  -1 3.35907 0.64073   2 
   0  -3   1 3.95732 0.88938   5 
   0  -3   1 1.94913 0.65943   3 
   0  -3   1 4.00682 0.83095   1 
   0  -3   1 0.57903 0.63335   1 
   0  -3   1 3.42538 0.93361   6 
  -1   3  -1 2933.65 74.0592   2 
  -1   3  -1 2852.22 74.2979   5 
  -1   3  -1 2843.12 74.0419   2 
  -1   3  -1 2918.08 74.2666   1 
   1  -3   1 2878.15 74.2467   1 
   1  -3   1 2758.49 74.0300   3 
   1  -3   1 2763.95 74.2499   5 
   1  -3   1 2813.17 74.4082   6 
  -2   3  -1 444.017 12.0633   7 
  -2   3  -1 448.051 12.2938   2 
  -2   3  -1 444.275 12.2683   2 
  -2   3  -1 427.436 12.4156   5 
  -2   3  -1 429.002 12.4205   1 
   2  -3   1 435.263 12.4086   5 
   2  -3   1 442.089 12.4177   6 
   2  -3   1 433.932 12.4512   1 
  -3   3  -1 6737.93 175.659   1 
   3  -3   1 6591.54 174.178   1 
   3  -3   1 6765.42 176.965   6 
   3  -3   1 6780.98 174.178   5 
  -4   3  -1 31.2157 2.43358   1 
   4  -3   1 31.1129 1.85206   7 
   4  -3   1 29.2299 1.62690   6 
   4  -3   1 30.8056 1.95867   2 
   4  -3   1 31.8061 2.30389   1 
  -5   3  -1 534.786 15.8340   1 
   5  -3   1 572.996 15.5976   2 
   5  -3   1 533.822 14.6399   6 
   5  -3   1 535.989 15.2131   7 
   5  -3   1 510.354 15.7171   1 
   5  -3   1 537.158 15.4836   2 
  -6   3  -1 55.4381 3.48209   1 
   6  -3   1 58.4935 2.14897   6 
   6  -3   1 57.1323 3.48217   1 
   6  -3   1 57.6976 3.20181   2 
   6  -3   1 60.8429 3.03473   7 
   6  -3   1 63.9434 3.34717   2 
  -7   3  -1 446.491 14.5268   1 
  -7   3  -1 463.399 13.0606   4 
   7  -3   1 479.466 14.5599   1 
   7  -3   1 462.798 13.7537   7 
   7  -3   1 454.178 14.1113   2 
   7  -3   1 459.953 14.1395   2 
  -8   3  -1 279.104 8.64011   4 
  -8   3  -1 296.888 10.4807   1 
   8  -3   1 280.391 9.88848   2 
   8  -3   1 293.738 9.96777   2 
   8  -3   1 282.771 9.50624   7 
   8  -3   1 288.416 10.2877   1 
  -9   3  -1 84.0624 3.51713   4 
  -9   3  -1 75.6841 4.99655   1 
   9  -3   1 71.4667 4.53208   2 
   9  -3   1 79.1965 4.39210   7 
   9  -3   1 85.4620 5.16635   1 
   9  -3   1 93.6310 4.92195   2 
 -10   3  -1 0.05472 2.12971   1 
 -10   3  -1 1.23205 1.13421   4 
  10  -3   1 4.91138 2.04079   2 
  10  -3   1 1.74726 1.87860   7 
  10  -3   1 2.12334 1.71560   2 
  10  -3   1 0.91975 2.00751   1 
 -11   3  -1 188.224 9.33134   1 
  11  -3   1 209.502 9.17573   1 
  11  -3   1 205.341 8.43207   7 
 -12   3  -1 263.375 11.3826   1 
  12  -3   1 233.364 10.6466   1 
  12  -3   1 244.609 9.92632   7 
 -13   3  -1 13.9541 3.89239   1 
  13  -3   1 14.4619 3.37754   7 
 -14   3  -1 156.847 9.77504   1 
  14  -3   1 158.684 8.61787   7 
 -15   3  -1 14.3260 4.78233   1 
  15  -3   1 10.0409 3.99351   7 
 -16   3  -1 44.9181 6.88053   1 
  16  -3   1 38.7517 5.70256   7 
 -17   3  -1 -3.0124 4.61955   1 
 -18   3  -1 0.44991 4.72115   1 
  16   2  -1 3.32747 4.60551   7 
 -16  -2   1 -1.8887 4.48723   1 
  15   2  -1 -0.9189 3.87841   7 
 -15  -2   1 -2.1383 4.22621   1 
  14   2  -1 0.16799 3.57844   7 
 -14  -2   1 -3.9659 3.43022   1 
  13   2  -1 0.38003 3.12773   7 
 -13  -2   1 -2.8124 3.23311   1 
  12   2  -1 0.84581 2.82927   7 
 -12  -2   1 3.00665 3.16543   1 
  11   2  -1 22.4750 3.61189   2 
  11   2  -1 19.7397 3.41026   7 
 -11  -2   1 18.9182 3.83859   1 
  10   2  -1 141.315 7.28188   2 
  10   2  -1 167.665 7.77155   2 
  10   2  -1 145.953 7.00099   7 
 -10  -2   1 157.965 7.97424   1 
   9   2  -1 17.5441 2.70057   2 
   9   2  -1 12.8443 2.68113   1 
   9   2  -1 16.3011 2.66335   7 
   9   2  -1 23.3172 3.25910   2 
  -9  -2   1 14.7832 3.05474   1 
   8   2  -1 232.190 8.61234   1 
   8   2  -1 215.031 7.97419   7 
   8   2  -1 220.953 8.33985   2 
   8   2  -1 211.591 8.35742   2 
  -8  -2   1 215.169 6.85379   6 
  -8  -2   1 220.196 8.85773   1 
   7   2  -1 -0.0549 1.39653   1 
   7   2  -1 -0.6606 1.22355   2 
   7   2  -1 -0.3111 1.26580   2 
   7   2  -1 2.64594 1.35763   7 
  -7  -2   1 0.78784 0.99743   6 
  -7  -2   1 1.25430 1.66663   1 
   6   2  -1 333.961 10.4762   2 
   6   2  -1 336.860 10.8156   1 
   6   2  -1 328.302 10.1209   7 
   6   2  -1 328.766 10.5326   2 
  -6  -2   1 321.357 10.9122   1 
  -6  -2   1 338.480 11.0672   1 
  -6  -2   1 331.493 10.4811   4 
  -6  -2   1 326.895 9.83816   6 
   5   2  -1 88.5981 3.63086   7 
   5   2  -1 96.9533 4.21476   1 
   5   2  -1 93.1185 3.89439   2 
   5   2  -1 89.6847 3.93401   2 
   5   2  -1 97.7263 3.83081   7 
  -5  -2   1 87.7240 3.58831   6 
  -5  -2   1 92.5247 4.34837   1 
  -5  -2   1 92.7169 4.08331   4 
  -5  -2   1 99.5700 4.44762   1 
   4   2  -1 1029.19 28.4305   1 
   4   2  -1 1015.13 27.8120   7 
   4   2  -1 1064.56 28.1585   2 
   4   2  -1 1051.70 28.0968   2 
   4   2  -1 1072.14 27.8517   7 
  -4  -2   1 1047.32 28.5820   1 
  -4  -2   1 1050.49 28.0819   6 
  -4  -2   1 1006.78 28.3287   4 
   3   2  -1 396.911 10.6814   7 
   3   2  -1 382.135 11.1905   1 
   3   2  -1 389.942 10.6867   7 
   3   2  -1 377.057 10.8214   2 
   3   2  -1 381.981 10.8543   2 
  -3  -2   1 395.992 11.0857   6 
  -3  -2   1 367.478 11.1687   1 
  -3  -2   1 388.539 11.2612   4 
  -3  -2   1 385.282 11.2638   1 
   2   2  -1 436.787 12.0260   2 
   2   2  -1 480.971 12.0902   2 
   2   2  -1 431.965 12.3737   1 
   2   2  -1 442.852 11.8967   7 
   2   2  -1 457.552 12.7300   5 
  -2  -2   1 439.817 12.4258   6 
  -2  -2   1 428.729 12.4122   1 
  -2  -2   1 428.708 12.3845   1 
  -2  -2   1 431.687 12.5032   4 
   1   2  -1 21.4091 1.45061   5 
   1   2  -1 22.0163 1.04397   2 
   1   2  -1 22.0782 0.97253   7 
   1   2  -1 23.0505 1.04302   2 
   1   2  -1 23.8824 1.32660   1 
  -1  -2   1 21.0886 1.41812   5 
  -1  -2   1 22.9426 1.32194   1 
  -1  -2   1 21.5184 1.31664   1 
  -1  -2   1 20.0692 1.35830   6 
   0   2  -1 164.927 4.61038   7 
   0   2  -1 164.828 5.02259   5 
   0   2  -1 160.359 4.90034   1 
   0   2  -1 163.763 4.60565   7 
   0   2  -1 164.448 4.69194   2 
   0   2  -1 170.431 4.71618   2 
   0  -2   1 172.413 5.13217   6 
   0  -2   1 162.590 4.91040   1 
   0  -2   1 165.080 4.79510   3 
   0  -2   1 162.116 4.89613   1 
   0  -2   1 166.492 5.00890   5 
  -1   2  -1 1921.53 49.8156   2 
  -1   2  -1 1913.80 49.8154   2 
  -1   2  -1 1990.83 49.8649   7 
  -1   2  -1 1903.18 49.9535   1 
  -1   2  -1 1869.67 49.9398   5 
   1  -2   1 1873.45 49.5472   3 
   1  -2   1 1955.70 49.9578   1 
   1  -2   1 1875.57 49.9388   1 
   1  -2   1 1940.55 50.0117   6 
   1  -2   1 1892.20 49.9475   5 
  -2   2  -1 2.51483 0.71670   1 
   2  -2   1 4.43740 0.65918   6 
   2  -2   1 2.73685 0.74890   1 
  -3   2  -1 9999.99 253.747   1 
   3  -2   1 9914.77 253.029   2 
   3  -2   1 9721.57 253.198   2 
   3  -2   1 9443.19 251.915   7 
   3  -2   1 9760.26 251.145   6 
   3  -2   1 9046.17 251.549   1 
  -4   2  -1 133.422 4.96259   1 
   4  -2   1 132.502 4.47165   7 
   4  -2   1 134.164 4.70338   2 
   4  -2   1 137.670 3.92703   6 
   4  -2   1 132.913 4.65990   2 
   4  -2   1 128.598 4.84169   1 
  -5   2  -1 474.270 14.1010   1 
  -5   2  -1 472.791 12.9833   4 
   5  -2   1 494.768 14.1078   1 
   5  -2   1 458.818 13.7613   2 
   5  -2   1 469.780 12.4297   6 
   5  -2   1 479.690 13.7704   2 
   5  -2   1 463.372 13.4634   7 
  -6   2  -1 60.5390 2.52887   4 
  -6   2  -1 69.4682 3.81316   1 
   6  -2   1 54.6250 3.24387   2 
   6  -2   1 65.2057 3.68431   1 
   6  -2   1 64.7551 3.38642   2 
  -7   2  -1 290.171 8.73129   4 
  -7   2  -1 300.364 10.2996   1 
   7  -2   1 294.514 9.86688   2 
   7  -2   1 300.203 10.2220   1 
   7  -2   1 298.170 9.51107   7 
   7  -2   1 304.159 9.89307   2 
  -8   2  -1 209.933 8.39716   1 
  -8   2  -1 201.898 6.62168   4 
   8  -2   1 214.795 7.95669   2 
   8  -2   1 215.882 7.58454   7 
   8  -2   1 218.100 7.99361   2 
   8  -2   1 203.643 8.16825   1 
  -9   2  -1 6.35311 1.34932   4 
  -9   2  -1 6.90791 2.37721   1 
   9  -2   1 5.69746 1.83699   2 
   9  -2   1 6.97374 1.90865   7 
   9  -2   1 5.87041 1.86960   2 
   9  -2   1 5.21915 2.14505   1 
 -10   2  -1 4.04736 2.50476   1 
 -10   2  -1 2.01390 1.23158   4 
  10  -2   1 1.41926 1.75272   2 
  10  -2   1 1.47717 1.91549   7 
  10  -2   1 0.13927 1.70274   2 
  10  -2   1 2.23249 2.21559   1 
 -11   2  -1 -0.2066 2.56064   1 
  11  -2   1 3.42575 2.15941   7 
  11  -2   1 -0.0353 2.19136   2 
  11  -2   1 2.73455 2.61034   1 
 -12   2  -1 328.901 13.6199   1 
  12  -2   1 338.027 13.3038   1 
  12  -2   1 346.177 12.4788   7 
 -13   2  -1 8.93549 3.69177   1 
  13  -2   1 8.33529 3.20445   7 
 -14   2  -1 9.20013 4.04461   1 
  14  -2   1 9.24573 3.61607   7 
 -15   2  -1 32.2294 5.72978   1 
  15  -2   1 23.5472 4.83587   7 
 -16   2  -1 1.35486 4.72338   1 
  16  -2   1 7.43115 4.26696   7 
 -17   2  -1 1.06416 4.71043   1 
  16   1  -1 9.58336 4.55987   7 
 -16  -1   1 4.19915 4.79446   1 
  15   1  -1 7.01626 4.10169   7 
 -15  -1   1 10.3513 4.66493   1 
  14   1  -1 1.70485 3.27050   7 
 -14  -1   1 4.04955 3.91472   1 
  13   1  -1 -1.6162 2.80741   7 
 -13  -1   1 3.25883 3.35936   1 
  12   1  -1 28.9783 4.04054   7 
 -12  -1   1 38.0990 5.06127   1 
  11   1  -1 -0.4253 2.22919   7 
  11   1  -1 2.27091 2.34017   2 
 -11  -1   1 1.42629 2.67036   1 
  10   1  -1 392.903 12.8161   7 
  10   1  -1 370.734 13.1938   2 
  10   1  -1 367.867 13.3655   2 
 -10  -1   1 393.049 13.8640   1 
   9   1  -1 8.38835 2.15570   2 
   9   1  -1 4.99231 1.94880   7 
   9   1  -1 9.39326 2.45458   1 
   9   1  -1 6.23520 1.99120   2 
  -9  -1   1 10.2790 2.54509   1 
  -9  -1   1 9.77892 2.09161   4 
   8   1  -1 427.046 13.1646   1 
   8   1  -1 381.386 12.6730   2 
   8   1  -1 383.424 12.2618   7 
   8   1  -1 401.635 12.8555   2 
  -8  -1   1 384.874 12.2023   4 
  -8  -1   1 404.497 13.2846   1 
  -8  -1   1 385.044 10.7486   6 
   7   1  -1 0.35130 1.12591   2 
   7   1  -1 0.00382 1.21224   1 
   7   1  -1 2.28262 1.20619   7 
   7   1  -1 -0.0861 1.09041   2 
  -7  -1   1 0.87355 1.24010   4 
  -7  -1   1 2.02592 1.59791   1 
  -7  -1   1 0.58435 0.68278   6 
   6   1  -1 2.89758 1.08866   2 
   6   1  -1 3.85562 1.14318   7 
   6   1  -1 2.69275 1.24287   1 
   6   1  -1 3.75931 1.20439   2 
  -6  -1   1 2.63166 1.19691   4 
  -6  -1   1 2.51109 0.76813   6 
  -6  -1   1 5.07310 1.61168   1 
   5   1  -1 43.6941 2.49491   2 
   5   1  -1 41.8593 2.39348   2 
   5   1  -1 39.3516 2.58660   1 
   5   1  -1 37.2915 2.15393   7 
  -5  -1   1 41.4085 2.46787   4 
  -5  -1   1 39.4712 2.75311   1 
  -5  -1   1 41.6377 1.92941   6 
   4   1  -1 408.592 11.6322   2 
   4   1  -1 395.940 11.5631   2 
   4   1  -1 422.501 11.9593   1 
   4   1  -1 405.641 11.3849   7 
  -4  -1   1 415.493 12.0486   1 
  -4  -1   1 411.712 11.3265   6 
  -4  -1   1 405.894 11.7585   4 
   3   1  -1 9.88196 0.91668   2 
   3   1  -1 9.05751 1.08194   1 
   3   1  -1 8.14163 0.77006   7 
   3   1  -1 10.9369 0.94141   2 
  -3  -1   1 7.86498 0.99987   1 
  -3  -1   1 11.3778 0.97228   6 
  -3  -1   1 10.1474 1.12828   4 
  -3  -1   1 10.1855 1.14629   1 
   2   1  -1 216.834 6.35398   1 
   2   1  -1 219.638 5.95893   7 
   2   1  -1 223.579 6.04411   2 
   2   1  -1 213.399 6.02855   2 
  -2  -1   1 217.787 6.43738   4 
  -2  -1   1 221.008 6.38826   1 
  -2  -1   1 218.380 6.35960   1 
  -2  -1   1 221.522 6.27822   6 
   1   1  -1 17.2640 0.92951   1 
   1   1  -1 16.0775 0.84692   1 
  -1  -1   1 22.3396 1.04037   6 
  -1  -1   1 16.8845 0.85717   1 
  -1  -1   1 15.7344 0.84843   1 
   0   1  -1 140.060 3.74039   1 
   0   1  -1 134.822 3.79428   5 
   0   1  -1 132.048 3.73598   1 
   0  -1   1 132.623 3.89639   6 
   0  -1   1 131.432 3.76295   3 
  -1   1  -1 3976.64 105.842   1 
  -1   1  -1 4157.59 105.038   2 
   1  -1   1 3888.65 105.025   1 
   1  -1   1 4104.92 105.606   1 
   1  -1   1 4016.17 105.400   6 
  -2   1  -1 19.8828 1.30459   1 
   2  -1   1 19.0659 1.13849   2 
   2  -1   1 19.3855 0.80567   6 
   2  -1   1 20.3948 1.27421   1 
  -3   1  -1 299.937 8.58850   1 
   3  -1   1 285.734 8.50986   1 
   3  -1   1 280.290 7.51943   6 
   3  -1   1 276.449 8.29957   2 
   3  -1   1 284.158 8.30706   2 
   3  -1   1 291.727 8.18018   7 
  -4   1  -1 1035.43 27.9012   1 
   4  -1   1 1052.09 27.6312   2 
   4  -1   1 1021.33 27.5772   2 
   4  -1   1 1051.20 27.3615   7 
   4  -1   1 949.279 27.7093   1 
  -5   1  -1 1334.36 35.3181   4 
  -5   1  -1 1313.77 36.4982   1 
   5  -1   1 1366.90 35.8696   7 
   5  -1   1 1351.04 36.2061   2 
   5  -1   1 1357.02 36.4691   1 
   5  -1   1 1332.41 36.1569   2 
  -6   1  -1 64.0110 2.68560   4 
  -6   1  -1 64.3061 3.83833   1 
   6  -1   1 71.7071 3.55049   2 
   6  -1   1 68.8613 3.79880   1 
   6  -1   1 69.3819 3.50417   2 
   6  -1   1 67.2443 3.25253   7 
  -7   1  -1 413.927 13.4143   1 
  -7   1  -1 416.767 11.8236   4 
   7  -1   1 406.856 12.9698   2 
   7  -1   1 422.076 12.5756   7 
   7  -1   1 415.952 13.2818   1 
   7  -1   1 410.587 12.9066   2 
  -8   1  -1 56.2631 2.84952   4 
  -8   1  -1 70.7239 4.55400   1 
   8  -1   1 60.9782 3.81443   2 
   8  -1   1 63.6739 3.70187   7 
   8  -1   1 60.8910 4.18152   1 
   8  -1   1 66.1119 3.93540   2 
  -9   1  -1 30.1067 3.70695   1 
  -9   1  -1 35.8524 2.49526   4 
   9  -1   1 44.0209 3.90717   2 
   9  -1   1 43.5308 4.20772   1 
   9  -1   1 36.9637 3.63584   2 
   9  -1   1 42.3984 3.45940   7 
 -10   1  -1 115.325 5.89725   4 
 -10   1  -1 112.568 6.66393   1 
  10  -1   1 117.044 6.16107   2 
  10  -1   1 128.501 6.43226   2 
  10  -1   1 112.171 6.47004   1 
  10  -1   1 110.313 5.77758   7 
 -11   1  -1 1.98134 2.65105   1 
  11  -1   1 1.95777 2.79238   2 
  11  -1   1 0.59109 2.37773   1 
  11  -1   1 -0.9557 2.09676   7 
 -12   1  -1 131.472 8.07329   1 
  12  -1   1 124.599 7.06822   7 
 -13   1  -1 4.41160 3.60496   1 
  13  -1   1 2.66430 2.88473   7 
 -14   1  -1 0.80258 3.80336   1 
  14  -1   1 3.14593 3.41461   7 
 -15   1  -1 -0.0590 3.84508   1 
  15  -1   1 0.18340 3.79016   7 
 -16   1  -1 21.9750 5.64401   1 
  16  -1   1 9.94261 4.69568   7 
 -17   1  -1 2.91370 5.15097   1 
  17   0  -1 6.21260 4.73001   7 
 -17   0   1 12.8716 5.44434   1 
  16   0  -1 5.53818 4.11240   7 
 -16   0   1 7.14291 4.77963   1 
  15   0  -1 86.2996 7.46477   7 
 -15   0   1 81.9213 8.07549   1 
  14   0  -1 17.9441 4.08041   7 
 -14   0   1 25.0542 4.94451   1 
  13   0  -1 0.19866 2.78844   7 
 -13   0   1 -0.3186 2.97648   1 
  12   0  -1 236.441 9.51265   7 
 -12   0   1 194.624 9.90375   1 
  11   0  -1 2.30666 2.07416   2 
  11   0  -1 5.76330 2.40431   7 
  11   0  -1 4.67263 2.70386   2 
 -11   0   1 2.57216 2.60768   1 
  10   0  -1 293.491 10.9526   2 
  10   0  -1 300.235 11.0587   1 
  10   0  -1 298.033 10.4111   7 
  10   0  -1 294.803 10.8378   2 
 -10   0   1 288.087 9.76735   4 
 -10   0   1 285.097 11.2992   1 
   9   0  -1 133.423 6.23071   1 
   9   0  -1 133.541 6.11830   2 
   9   0  -1 119.046 5.82987   2 
   9   0  -1 121.314 5.59014   7 
  -9   0   1 123.887 5.23525   4 
  -9   0   1 124.661 6.37053   1 
   8   0  -1 347.274 11.6240   2 
   8   0  -1 342.708 11.7782   1 
   8   0  -1 350.877 11.1845   7 
   8   0  -1 369.602 11.6506   2 
  -8   0   1 352.194 10.9879   4 
  -8   0   1 367.330 12.1449   1 
   7   0  -1 308.118 10.1727   2 
   7   0  -1 305.444 10.2081   2 
   7   0  -1 317.206 9.88269   7 
   7   0  -1 325.881 10.5344   1 
  -7   0   1 329.222 9.87797   4 
  -7   0   1 319.551 10.6935   1 
   6   0  -1 942.398 25.5790   2 
   6   0  -1 924.228 25.8263   1 
   6   0  -1 943.489 25.5646   2 
  -6   0   1 902.125 25.9268   1 
  -6   0   1 916.521 25.2538   4 
  -6   0   1 923.526 24.1217   6 
   5   0  -1 16.5756 1.56637   2 
   5   0  -1 22.9089 1.89200   2 
   5   0  -1 22.1679 2.06050   1 
   5   0  -1 16.4344 1.49928   7 
  -5   0   1 20.1624 0.95682   6 
  -5   0   1 20.2506 1.74165   4 
  -5   0   1 20.1735 2.02179   1 
   4   0  -1 55.2628 2.65917   1 
   4   0  -1 60.2333 2.47560   2 
   4   0  -1 60.8863 2.34648   7 
   4   0  -1 58.4545 2.48657   2 
  -4   0   1 57.6830 2.78287   1 
  -4   0   1 64.4817 2.53447   4 
  -4   0   1 61.2168 1.94067   6 
   3   0  -1 1487.28 40.3594   1 
   3   0  -1 1582.32 40.1444   2 
   3   0  -1 1522.55 40.1227   2 
   3   0  -1 1492.06 39.9848   7 
  -3   0   1 1494.76 40.2318   4 
  -3   0   1 1543.63 39.7999   6 
  -3   0   1 1565.19 40.4022   1 
  -3   0   1 1586.55 40.4623   1 
   2   0  -1 160.787 4.48839   2 
   2   0  -1 151.065 4.68460   1 
   2   0  -1 162.044 4.49140   2 
   2   0  -1 171.315 4.43452   7 
  -2   0   1 157.719 4.73260   1 
  -2   0   1 162.676 4.43376   6 
   1   0  -1 3520.87 90.7007   1 
   1   0  -1 3461.82 90.8389   1 
  -1   0   1 3708.45 90.8354   6 
  -1   0   1 3232.89 91.4914   3 
  -1   0  -1 1186.41 30.1867   1 
  -1   0  -1 1191.15 30.1863   1 
  -1   0  -1 1159.85 30.1546   1 
   1   0   1 1143.22 30.1559   1 
   1   0   1 1098.60 30.1392   1 
   1   0   1 1135.20 30.0672   2 
  -2   0  -1 317.469 9.05535   1 
  -2   0  -1 314.345 9.02059   1 
  -2   0  -1 319.382 9.07178   1 
   2   0   1 305.854 8.99639   1 
   2   0   1 321.238 8.73981   7 
   2   0   1 311.954 8.86598   2 
   2   0   1 330.462 8.91908   2 
  -3   0  -1 1182.28 32.6713   1 
   3   0   1 1241.54 32.7068   1 
   3   0   1 1251.32 32.4711   2 
   3   0   1 1188.32 32.2374   7 
   3   0   1 1246.91 32.5028   2 
  -4   0  -1 503.450 13.8361   4 
  -4   0  -1 511.296 14.7124   1 
  -4   0  -1 519.621 13.4446   6 
   4   0   1 492.363 14.1369   7 
   4   0   1 513.827 14.4075   2 
   4   0   1 501.613 14.6494   1 
   4   0   1 516.157 14.4416   2 
  -5   0  -1 1126.05 30.0932   4 
  -5   0  -1 1135.76 31.2154   1 
  -5   0  -1 1140.68 29.4734   6 
   5   0   1 1122.97 30.8003   2 
   5   0   1 1117.31 31.0961   1 
   5   0   1 1135.61 30.8739   2 
   5   0   1 1149.62 30.5201   7 
  -6   0  -1 6.94335 1.74261   1 
  -6   0  -1 8.17856 1.22880   4 
   6   0   1 6.83693 1.35208   7 
   6   0   1 9.13293 1.61373   2 
   6   0   1 6.37646 1.61535   1 
   6   0   1 9.32560 1.61461   2 
  -7   0  -1 149.429 6.42644   1 
  -7   0  -1 148.901 5.14775   4 
   7   0   1 147.237 6.06200   2 
   7   0   1 149.764 5.71241   7 
   7   0   1 151.879 6.39713   1 
   7   0   1 139.122 5.94462   2 
  -8   0  -1 139.635 5.16070   4 
  -8   0  -1 140.137 6.61503   1 
   8   0   1 149.582 5.97198   7 
   8   0   1 138.916 6.17264   2 
   8   0   1 137.436 6.25311   2 
   8   0   1 147.307 6.57297   1 
  -9   0  -1 60.2444 5.08134   1 
   9   0   1 61.0388 4.32561   7 
   9   0   1 67.5932 4.77767   1 
   9   0   1 67.2059 4.56556   2 
   9   0   1 65.5482 4.39544   2 
 -10   0  -1 10.4461 3.07067   1 
  10   0   1 8.16888 2.43437   7 
  10   0   1 11.7987 2.68877   2 
  10   0   1 7.25040 2.36195   2 
  10   0   1 8.41136 2.77276   1 
 -11   0  -1 -2.2637 2.49622   1 
  11   0   1 -1.4322 2.17742   7 
 -12   0  -1 109.136 7.71194   1 
  12   0   1 121.478 6.95991   7 
 -13   0  -1 11.8389 4.13740   1 
  13   0   1 6.21521 3.23897   7 
 -14   0  -1 18.7711 4.73366   1 
  14   0   1 14.6698 4.19285   7 
 -15   0  -1 2.83832 4.37760   1 
  15   0   1 2.55355 3.78222   7 
 -16   0  -1 5.71467 4.87849   1 
  16   0   1 4.73027 4.37503   7 
  17  -1  -1 39.1606 6.04068   7 
 -17   1   1 27.6798 6.08345   1 
  16  -1  -1 83.3899 7.42972   7 
 -16   1   1 72.3766 7.86636   1 
  15  -1  -1 15.8401 4.35553   7 
 -15   1   1 11.4238 4.46616   1 
  14  -1  -1 14.8298 3.83012   7 
 -14   1   1 13.0501 4.38661   1 
  13  -1  -1 0.36919 2.66544   7 
 -13   1   1 0.49641 3.15159   1 
  12  -1  -1 314.003 11.4775   7 
  12  -1  -1 284.278 15.8458   2 
 -12   1   1 297.743 12.3679   1 
  11  -1  -1 4.38109 2.46309   1 
  11  -1  -1 0.95100 1.98640   7 
  11  -1  -1 3.36227 2.08851   2 
  11  -1  -1 0.10775 1.97804   2 
 -11   1   1 1.34408 2.59169   1 
 -11   1   1 2.32387 1.57018   4 
  10  -1  -1 249.440 9.64546   2 
  10  -1  -1 254.293 9.78099   1 
  10  -1  -1 253.790 9.11388   7 
  10  -1  -1 238.533 9.41389   2 
 -10   1   1 245.695 8.41115   4 
 -10   1   1 241.006 9.90265   1 
   9  -1  -1 57.0763 3.95506   2 
   9  -1  -1 60.8924 3.84943   7 
   9  -1  -1 60.9596 4.00596   2 
   9  -1  -1 63.2844 4.27829   1 
  -9   1   1 68.3280 3.44775   4 
  -9   1   1 71.4578 4.70633   1 
   8  -1  -1 513.476 15.4177   2 
   8  -1  -1 495.976 15.4217   2 
   8  -1  -1 500.525 14.9813   7 
   8  -1  -1 499.369 15.6596   1 
  -8   1   1 498.030 14.6652   4 
  -8   1   1 519.971 15.9629   1 
   7  -1  -1 525.860 15.3492   2 
   7  -1  -1 512.058 14.9576   7 
   7  -1  -1 526.814 15.4016   2 
   7  -1  -1 500.222 15.5624   1 
  -7   1   1 511.921 14.7704   4 
  -7   1   1 521.613 15.7838   1 
   6  -1  -1 1863.42 48.9205   7 
   6  -1  -1 1800.54 49.2411   2 
   6  -1  -1 1887.20 49.5777   1 
   6  -1  -1 1818.33 49.2073   2 
  -6   1   1 1875.82 49.6792   1 
  -6   1   1 1842.97 48.8399   4 
   5  -1  -1 300.845 9.30303   2 
   5  -1  -1 311.589 9.33415   2 
   5  -1  -1 313.578 9.07740   7 
   5  -1  -1 310.423 9.60054   1 
  -5   1   1 316.142 9.11931   4 
  -5   1   1 311.918 9.67205   1 
   4  -1  -1 197.823 5.80916   7 
   4  -1  -1 197.476 5.99399   2 
   4  -1  -1 195.447 6.20354   1 
   4  -1  -1 194.536 5.97872   2 
  -4   1   1 185.762 5.83411   4 
  -4   1   1 188.125 6.22086   1 
   3  -1  -1 2892.33 74.0296   1 
   3  -1  -1 2718.44 73.6502   7 
   3  -1  -1 2850.88 73.8322   2 
   3  -1  -1 2882.58 73.8536   2 
  -3   1   1 2854.75 73.8106   4 
  -3   1   1 2758.90 74.0301   1 
  -3   1   1 2931.02 74.0386   1 
   2  -1  -1 1457.50 39.4771   1 
   2  -1  -1 1494.28 39.2604   7 
   2  -1  -1 1526.39 39.3626   2 
   2  -1  -1 1571.60 39.3915   2 
  -2   1   1 1519.02 39.5024   1 
  -2   1   1 1493.19 39.5101   1 
   1  -1  -1 5214.99 138.778   1 
   1  -1  -1 5782.33 139.500   2 
   1  -1  -1 5206.17 139.585   5 
   1  -1  -1 4904.56 138.299   1 
   1  -1  -1 5502.77 139.307   2 
  -1   1   1 5315.23 137.756   3 
  -1   1   1 5495.91 139.755   5 
  -1   1   1 5149.60 138.686   1 
   0  -1  -1 238.755 6.78293   1 
   0  -1  -1 233.668 6.77522   5 
   0   1   1 241.907 6.79395   5 
   0   1   1 243.307 6.79389   1 
   0   1   1 246.194 6.80039   1 
   0   1   1 257.165 6.72022   2 
  -1  -1  -1 157.518 4.84394   1 
  -1  -1  -1 153.047 4.79803   1 
   1   1   1 168.206 4.70469   2 
   1   1   1 160.921 4.55205   7 
   1   1   1 152.854 4.81935   1 
   1   1   1 153.194 4.63501   2 
  -2  -1  -1 1560.42 41.8187   1 
   2   1   1 1578.76 41.8120   1 
   2   1   1 1523.55 41.3960   7 
   2   1   1 1629.12 41.6416   2 
   2   1   1 1626.04 41.6039   2 
  -3  -1  -1 996.008 28.0269   1 
   3   1   1 1027.14 27.7779   2 
   3   1   1 1087.56 27.7923   2 
   3   1   1 1022.42 27.5194   7 
   3   1   1 1035.58 28.0071   1 
  -4  -1  -1 490.185 13.4311   6 
  -4  -1  -1 484.933 14.4226   1 
  -4  -1  -1 490.744 14.4570   1 
   4   1   1 475.293 14.0011   2 
   4   1   1 499.367 13.7900   7 
   4   1   1 479.447 14.0440   2 
   4   1   1 509.149 14.4133   1 
  -5  -1  -1 66.7017 3.74787   1 
  -5  -1  -1 65.9781 3.73381   1 
  -5  -1  -1 65.3656 2.57624   6 
   5   1   1 68.1604 3.14230   7 
   5   1   1 66.0921 3.38822   2 
   5   1   1 59.3651 3.50118   1 
   5   1   1 69.2829 3.36820   2 
  -6  -1  -1 238.985 6.97304   6 
  -6  -1  -1 257.811 8.82507   1 
   6   1   1 231.095 8.23992   2 
   6   1   1 239.756 8.50847   1 
   6   1   1 238.475 7.84068   7 
   6   1   1 221.613 8.07207   2 
  -7  -1  -1 -0.1888 1.55011   1 
  -7  -1  -1 1.67890 0.69116   6 
   7   1   1 1.43624 1.49434   1 
   7   1   1 0.73272 1.28548   7 
   7   1   1 2.04124 1.36852   2 
   7   1   1 1.50169 1.29671   2 
  -8  -1  -1 20.5380 3.07050   1 
   8   1   1 29.5517 3.05074   7 
   8   1   1 28.6748 3.07147   2 
   8   1   1 26.6047 3.18113   1 
   8   1   1 22.1802 2.70031   2 
  -9  -1  -1 2.95791 2.24827   1 
   9   1   1 1.71671 1.68841   2 
   9   1   1 0.96979 1.87760   7 
   9   1   1 0.41068 2.03781   1 
   9   1   1 1.11378 1.64585   2 
 -10  -1  -1 31.0982 4.15716   1 
  10   1   1 26.6148 3.53379   7 
  10   1   1 36.5008 4.25702   1 
  10   1   1 33.6467 3.88581   2 
 -11  -1  -1 3.97995 3.13141   1 
  11   1   1 5.30300 2.64763   7 
 -12  -1  -1 -1.3615 3.18306   1 
  12   1   1 0.00366 2.76664   7 
 -13  -1  -1 7.09379 3.94955   1 
  13   1   1 8.37857 3.71209   7 
 -14  -1  -1 13.6171 4.78855   1 
  14   1   1 12.3460 4.18866   7 
 -15  -1  -1 2.69985 4.45601   1 
  15   1   1 2.75597 3.96527   7 
 -16  -1  -1 11.9244 5.32441   1 
  16   1   1 18.0138 5.87451   7 
 -18   2   1 2.99823 5.07765   1 
  17  -2  -1 6.86242 4.55916   7 
 -17   2   1 7.05638 4.85729   1 
  16  -2  -1 93.1771 7.68646   7 
 -16   2   1 78.2967 8.20318   1 
  15  -2  -1 11.6625 3.96684   7 
 -15   2   1 16.0049 4.75963   1 
  14  -2  -1 162.707 8.70821   7 
 -14   2   1 162.719 9.58031   1 
  13  -2  -1 4.27840 2.81497   7 
 -13   2   1 -0.0987 3.07844   1 
  12  -2  -1 244.850 12.4693   2 
  12  -2  -1 250.262 9.91325   7 
 -12   2   1 254.218 11.0194   1 
  11  -2  -1 37.6441 3.99611   2 
  11  -2  -1 38.3790 3.80517   7 
  11  -2  -1 54.8547 4.57868   2 
  11  -2  -1 38.5958 4.29378   1 
 -11   2   1 46.4283 3.44479   4 
 -11   2   1 41.6998 4.58896   1 
  10  -2  -1 35.0321 3.31569   7 
  10  -2  -1 40.5653 4.16872   1 
  10  -2  -1 46.3877 3.94195   2 
  10  -2  -1 47.1887 4.14799   2 
 -10   2   1 40.2292 4.24715   1 
 -10   2   1 45.2701 3.28117   4 
   9  -2  -1 207.570 8.09627   2 
   9  -2  -1 205.681 7.72227   7 
   9  -2  -1 215.996 8.43502   1 
   9  -2  -1 219.835 8.23742   2 
  -9   2   1 209.004 7.20606   4 
  -9   2   1 216.499 8.65928   1 
   8  -2  -1 400.049 12.9590   2 
   8  -2  -1 421.702 13.0956   2 
   8  -2  -1 425.609 13.3714   1 
   8  -2  -1 421.023 12.7000   7 
  -8   2   1 408.606 13.4791   1 
  -8   2   1 409.002 12.2475   4 
   7  -2  -1 412.874 12.5738   2 
   7  -2  -1 417.453 12.6278   2 
   7  -2  -1 401.293 12.8113   1 
   7  -2  -1 397.151 12.2003   7 
  -7   2   1 415.286 13.0275   1 
  -7   2   1 414.325 12.0112   4 
   6  -2  -1 383.841 11.6722   2 
   6  -2  -1 386.484 11.6894   2 
   6  -2  -1 389.341 11.3555   7 
   6  -2  -1 376.805 11.8774   1 
   6  -2  -1 385.956 10.1695   6 
  -6   2   1 400.935 12.0891   1 
  -6   2   1 384.388 11.2352   4 
   5  -2  -1 1012.75 28.1710   2 
   5  -2  -1 1042.70 28.4544   1 
   5  -2  -1 1025.58 27.9126   7 
   5  -2  -1 1077.47 28.2485   2 
  -5   2   1 1036.35 27.9010   4 
  -5   2   1 1049.52 28.5280   1 
   4  -2  -1 118.519 4.43822   1 
   4  -2  -1 123.382 4.25879   2 
   4  -2  -1 121.435 4.05778   7 
   4  -2  -1 125.990 4.27870   2 
  -4   2   1 123.951 4.50743   1 
   3  -2  -1 653.887 18.0675   2 
   3  -2  -1 694.028 18.2791   1 
   3  -2  -1 652.252 17.8795   7 
   3  -2  -1 669.002 18.0707   2 
  -3   2   1 663.480 18.2694   1 
   2  -2  -1 1.84630 0.64964   1 
   2  -2  -1 -0.3350 0.43871   2 
   2  -2  -1 0.13847 0.57989   5 
   2  -2  -1 0.00851 0.40061   2 
  -2   2   1 1.28917 0.64048   5 
  -2   2   1 0.99741 0.61714   1 
   1  -2  -1 13.0810 1.06993   5 
   1  -2  -1 12.7801 1.11151   1 
  -1   2   1 12.3489 1.11385   1 
  -1   2   1 13.9835 1.14090   5 
   0  -2  -1 753.244 20.4685   5 
   0  -2  -1 704.622 20.3953   1 
   0   2   1 773.107 20.1246   7 
   0   2   1 759.540 20.4867   5 
   0   2   1 777.399 20.2745   2 
   0   2   1 775.994 20.4644   1 
   0   2   1 767.723 20.3030   2 
  -1  -2  -1 926.801 25.2604   1 
   1   2   1 949.537 25.2743   1 
   1   2   1 969.822 24.8700   7 
   1   2   1 924.596 25.0073   2 
   1   2   1 950.269 25.4080   5 
   1   2   1 911.817 25.0123   2 
  -2  -2  -1 2.29989 0.94138   1 
   2   2   1 1.57031 0.83480   1 
   2   2   1 1.92284 0.67184   2 
   2   2   1 2.48001 0.72104   2 
   2   2   1 2.05613 0.66036   7 
  -3  -2  -1 936.681 26.2788   1 
   3   2   1 949.059 25.6415   7 
   3   2   1 950.080 25.8900   2 
   3   2   1 943.160 25.9465   2 
   3   2   1 995.557 26.2954   1 
  -4  -2  -1 81.7310 4.04359   1 
  -4  -2  -1 83.2851 3.41237   6 
   4   2   1 89.9839 3.83312   2 
   4   2   1 91.4398 4.07967   1 
   4   2   1 81.5936 3.67175   2 
   4   2   1 81.9221 3.46960   7 
  -5  -2  -1 135.783 5.66058   1 
  -5  -2  -1 124.439 4.54037   6 
   5   2   1 131.188 5.48161   1 
   5   2   1 125.065 5.18659   2 
   5   2   1 117.967 4.77062   7 
   5   2   1 131.558 5.14809   2 
  -6  -2  -1 4.21227 1.77917   1 
  -6  -2  -1 0.85571 1.47473   1 
  -6  -2  -1 3.40958 1.07844   6 
   6   2   1 0.98066 1.16754   2 
   6   2   1 4.84466 1.47617   7 
   6   2   1 3.78246 1.36374   2 
   6   2   1 4.95019 1.69543   1 
  -7  -2  -1 159.696 5.52795   6 
  -7  -2  -1 163.326 7.32774   1 
   7   2   1 168.140 7.12307   1 
   7   2   1 167.841 6.76152   2 
   7   2   1 160.530 6.79359   2 
   7   2   1 162.838 6.42148   7 
  -8  -2  -1 70.4928 3.30758   6 
  -8  -2  -1 62.2644 5.18505   1 
   8   2   1 73.4299 4.39374   7 
   8   2   1 71.1020 4.68448   2 
   8   2   1 73.4900 4.81795   1 
   8   2   1 69.2156 4.52971   2 
  -9  -2  -1 59.2229 5.38846   1 
   9   2   1 59.8950 5.09314   2 
   9   2   1 49.7951 4.31941   7 
   9   2   1 40.8767 4.03233   2 
   9   2   1 59.5492 5.13326   1 
 -10  -2  -1 120.402 7.38407   1 
  10   2   1 116.587 6.86785   2 
  10   2   1 115.513 6.40454   7 
 -11  -2  -1 8.17026 3.60407   1 
  11   2   1 10.2192 3.09341   7 
 -12  -2  -1 7.22537 3.68932   1 
  12   2   1 4.90722 3.08613   7 
 -13  -2  -1 2.22558 3.77848   1 
  13   2   1 -0.7837 3.35957   7 
 -14  -2  -1 9.14269 4.69363   1 
  14   2   1 5.81830 3.97203   7 
 -15  -2  -1 13.8538 5.29141   1 
  15   2   1 8.93929 4.70315   7 
 -18   3   1 3.49700 5.02793   1 
  17  -3  -1 8.33753 4.43383   7 
 -17   3   1 2.13915 4.50772   1 
  16  -3  -1 82.9106 7.26340   7 
 -16   3   1 74.8927 8.00507   1 
  15  -3  -1 9.00567 3.73717   7 
 -15   3   1 6.40476 4.16495   1 
  14  -3  -1 196.437 9.32558   7 
 -14   3   1 189.067 10.2962   1 
  13  -3  -1 5.73529 2.83969   7 
 -13   3   1 7.10990 3.50223   1 
  12  -3  -1 249.386 10.5695   1 
  12  -3  -1 253.158 9.86468   7 
 -12   3   1 238.608 10.8209   1 
  11  -3  -1 337.211 11.7748   7 
  11  -3  -1 322.080 12.2662   2 
  11  -3  -1 347.840 12.4367   2 
  11  -3  -1 354.694 12.6937   1 
 -11   3   1 343.071 10.8859   4 
 -11   3   1 340.589 12.9106   1 
  10  -3  -1 716.111 21.3793   2 
  10  -3  -1 713.396 21.4387   2 
  10  -3  -1 662.938 20.7468   7 
  10  -3  -1 713.226 21.6834   1 
 -10   3   1 709.488 20.1193   4 
 -10   3   1 708.983 21.9774   1 
   9  -3  -1 71.1928 4.38732   2 
   9  -3  -1 74.9609 4.44510   2 
   9  -3  -1 81.3933 4.83304   1 
   9  -3  -1 78.7749 4.22838   7 
  -9   3   1 74.7006 3.66652   4 
  -9   3   1 88.4728 5.18803   1 
   8  -3  -1 70.4903 4.18668   1 
   8  -3  -1 78.0503 4.17284   2 
   8  -3  -1 70.0857 3.95417   2 
   8  -3  -1 71.8491 3.81201   7 
  -8   3   1 73.9671 3.47640   4 
  -8   3   1 81.3793 4.64065   1 
   7  -3  -1 322.702 10.6288   1 
   7  -3  -1 327.314 10.0050   7 
   7  -3  -1 324.574 10.3851   2 
   7  -3  -1 325.167 10.3697   2 
   7  -3  -1 322.202 8.84374   6 
  -7   3   1 317.730 9.79461   4 
  -7   3   1 308.082 10.6747   1 
   6  -3  -1 16.7294 1.24846   6 
   6  -3  -1 11.5723 1.88508   1 
   6  -3  -1 11.2554 1.59462   7 
  -6   3   1 14.0753 2.03938   1 
   5  -3  -1 593.789 16.5331   7 
   5  -3  -1 597.826 16.8218   2 
   5  -3  -1 580.719 16.8150   2 
   5  -3  -1 598.978 17.0804   1 
  -5   3   1 597.560 17.1346   1 
   4  -3  -1 166.048 5.57514   2 
   4  -3  -1 166.036 5.57632   2 
   4  -3  -1 165.630 5.74720   1 
   4  -3  -1 165.161 5.73210   5 
   4  -3  -1 169.870 5.34760   7 
  -4   3   1 163.451 5.82174   1 
   3  -3  -1 409.191 11.4941   2 
   3  -3  -1 377.745 10.8747   7 
   3  -3  -1 409.030 11.1538   2 
   3  -3  -1 389.518 11.2842   5 
   3  -3  -1 374.303 11.2683   1 
  -3   3   1 381.702 11.2799   5 
  -3   3   1 370.286 11.2668   1 
   2  -3  -1 67.9756 2.91902   5 
   2  -3  -1 69.3579 2.98284   1 
  -2   3   1 77.4980 3.05859   1 
  -2   3   1 70.2942 2.99089   5 
   1  -3  -1 1321.98 35.8308   5 
   1  -3  -1 1282.46 35.8056   1 
  -1   3   1 1403.15 35.6800   2 
  -1   3   1 1349.62 35.4339   7 
  -1   3   1 1387.27 35.9010   1 
  -1   3   1 1341.28 35.8826   5 
  -1   3   1 1337.34 35.6347   2 
   0  -3  -1 563.891 16.5378   1 
   0  -3  -1 592.091 16.6679   5 
   0   3   1 586.234 16.1045   7 
   0   3   1 590.581 16.2845   2 
   0   3   1 581.144 16.6381   5 
   0   3   1 591.946 16.5623   1 
   0   3   1 632.113 16.3858   2 
   0   3   1 606.814 16.3526   2 
  -1  -3  -1 124.044 4.70675   1 
  -1  -3  -1 135.435 4.87831   5 
   1   3   1 130.808 4.75451   1 
   1   3   1 127.459 4.84442   5 
   1   3   1 130.069 4.44449   2 
   1   3   1 134.269 4.48632   2 
   1   3   1 124.170 4.23632   7 
  -2  -3  -1 124.768 5.00021   1 
   2   3   1 129.986 4.65994   2 
   2   3   1 129.040 4.96816   1 
   2   3   1 130.750 5.21136   5 
   2   3   1 142.801 4.51556   7 
   2   3   1 124.878 4.62105   2 
  -3  -3  -1 77.3815 3.53725   6 
  -3  -3  -1 80.8364 3.97032   1 
   3   3   1 77.7948 3.32122   7 
   3   3   1 80.9555 3.53669   2 
   3   3   1 75.0256 3.50199   2 
   3   3   1 73.4544 3.70004   1 
   3   3   1 77.7621 4.06637   5 
  -4  -3  -1 166.648 5.79159   6 
  -4  -3  -1 155.961 6.28128   1 
   4   3   1 159.023 5.87749   2 
   4   3   1 153.967 6.18835   1 
   4   3   1 155.455 5.89939   2 
   4   3   1 156.170 5.58586   7 
  -5  -3  -1 30.4987 2.47069   6 
  -5  -3  -1 28.2192 3.07829   1 
   5   3   1 29.4568 2.52950   7 
   5   3   1 25.3065 2.38090   2 
   5   3   1 26.2844 2.48452   2 
   5   3   1 27.7407 2.79505   1 
  -6  -3  -1 104.761 5.68984   1 
  -6  -3  -1 113.562 4.62288   6 
  -6  -3  -1 115.855 5.80496   1 
   6   3   1 119.602 5.64026   1 
   6   3   1 106.548 5.17312   2 
   6   3   1 100.088 5.17003   2 
   6   3   1 110.678 4.92129   7 
  -7  -3  -1 39.6428 2.90991   6 
  -7  -3  -1 32.7432 3.79537   1 
  -7  -3  -1 35.2139 4.02430   1 
   7   3   1 36.3164 3.72681   1 
   7   3   1 31.0384 3.22577   2 
   7   3   1 37.6071 3.62179   2 
   7   3   1 36.3532 3.23707   7 
  -8  -3  -1 51.2762 4.95385   1 
  -8  -3  -1 56.5900 4.49589   6 
   8   3   1 47.2771 4.33741   1 
   8   3   1 40.6142 3.68885   7 
   8   3   1 53.1956 4.53265   2 
   8   3   1 42.2034 4.26946   2 
  -9  -3  -1 86.8367 6.32285   1 
   9   3   1 84.1771 5.86077   2 
   9   3   1 116.178 5.95547   7 
 -10  -3  -1 8.18363 3.28766   1 
  10   3   1 17.7036 3.30758   7 
 -11  -3  -1 14.1673 4.11778   1 
  11   3   1 15.4563 3.52860   7 
 -12  -3  -1 1.11906 3.44473   1 
  12   3   1 0.23722 3.17552   7 
 -13  -3  -1 38.4232 6.10712   1 
  13   3   1 40.1794 5.61675   7 
 -14  -3  -1 20.8407 5.44053   1 
  14   3   1 22.4751 5.14167   7 
 -15  -3  -1 75.0119 8.72892   1 
  15   3   1 95.3612 8.70245   7 
 -18   4   1 12.1753 5.67744   1 
  17  -4  -1 -4.6080 3.80931   7 
 -17   4   1 5.94128 4.58913   1 
  16  -4  -1 95.4357 7.67671   7 
 -16   4   1 84.2497 8.41043   1 
  15  -4  -1 19.4582 4.24086   7 
 -15   4   1 29.5669 5.46874   1 
  14  -4  -1 188.266 9.40123   7 
 -14   4   1 221.338 10.9496   1 
  13  -4  -1 1.84070 2.56972   7 
 -13   4   1 2.68576 3.16275   1 
  12  -4  -1 346.550 13.0604   1 
  12  -4  -1 325.455 12.0319   7 
 -12   4   1 343.758 13.4145   1 
  11  -4  -1 6.97393 2.26060   2 
  11  -4  -1 9.78311 2.74359   1 
  11  -4  -1 3.77003 2.12318   7 
 -11   4   1 9.01379 1.94000   4 
 -11   4   1 4.13266 2.58227   1 
  10  -4  -1 357.205 12.1306   7 
  10  -4  -1 375.181 12.7427   2 
  10  -4  -1 373.969 12.6535   2 
  10  -4  -1 387.139 13.1094   1 
 -10   4   1 362.989 11.4544   4 
 -10   4   1 349.155 13.0782   1 
   9  -4  -1 81.1748 4.89617   1 
   9  -4  -1 63.1251 4.16903   2 
   9  -4  -1 72.9500 2.32244   6 
   9  -4  -1 71.1863 4.37694   2 
   9  -4  -1 67.1866 4.01102   7 
  -9   4   1 69.3223 3.62364   4 
  -9   4   1 75.9764 4.94706   1 
   8  -4  -1 1.52047 1.30368   2 
   8  -4  -1 2.15137 1.39034   7 
   8  -4  -1 4.02748 0.85062   6 
   8  -4  -1 3.17593 1.43206   2 
   8  -4  -1 2.00049 1.67400   1 
  -8   4   1 1.43301 1.69525   1 
  -8   4   1 3.49323 1.24268   4 
   7  -4  -1 59.2063 3.21539   7 
   7  -4  -1 53.5088 3.36342   2 
   7  -4  -1 63.6189 3.75099   1 
   7  -4  -1 62.4676 2.65980   6 
  -7   4   1 65.6092 3.89576   1 
   6  -4  -1 13.4460 1.65858   7 
   6  -4  -1 12.0382 1.95129   1 
   6  -4  -1 12.6719 1.82401   2 
   6  -4  -1 11.3264 1.76696   2 
  -6   4   1 13.5826 2.10442   1 
   5  -4  -1 460.060 13.7230   2 
   5  -4  -1 464.001 13.9963   1 
   5  -4  -1 459.835 13.7222   2 
   5  -4  -1 470.189 13.4127   7 
  -5   4   1 477.435 14.1477   1 
   4  -4  -1 -0.4876 0.73986   7 
   4  -4  -1 -0.2173 0.74248   5 
   4  -4  -1 0.67715 0.79520   2 
   4  -4  -1 0.18981 0.96851   1 
  -4   4   1 -1.3898 0.88377   1 
   3  -4  -1 188.184 5.92964   7 
   3  -4  -1 183.924 6.32455   5 
   3  -4  -1 193.061 6.48426   1 
  -3   4   1 187.372 5.88553   7 
  -3   4   1 187.745 6.45929   1 
  -3   4   1 186.755 6.40458   5 
   2  -4  -1 24.4270 2.02522   5 
   2  -4  -1 26.6581 2.17693   1 
  -2   4   1 26.5383 1.78121   2 
  -2   4   1 26.3426 2.12666   5 
  -2   4   1 22.0277 1.96343   1 
  -2   4   1 24.0676 1.57508   7 
   1  -4  -1 11.6081 1.56636   1 
   1  -4  -1 11.4407 1.51090   5 
  -1   4   1 10.3260 1.47002   5 
  -1   4   1 12.3427 1.33453   2 
  -1   4   1 10.7126 1.54416   1 
  -1   4   1 13.4287 1.48773   2 
  -1   4   1 9.72459 1.18134   7 
   0  -4  -1 15.2888 1.77966   5 
   0  -4  -1 14.8795 1.81383   1 
   0   4   1 17.1789 1.48457   7 
   0   4   1 15.7956 1.49884   2 
   0   4   1 13.6980 1.74322   5 
   0   4   1 15.4557 1.44711   2 
   0   4   1 13.5716 1.63125   1 
  -1  -4  -1 0.62237 1.04785   1 
  -1  -4  -1 4.48009 1.33284   5 
   1   4   1 2.25766 0.89806   2 
   1   4   1 3.72094 1.35419   5 
   1   4   1 3.13586 0.94875   2 
   1   4   1 3.08212 0.94551   7 
   1   4   1 1.78645 1.08468   1 
  -2  -4  -1 15.3992 2.13015   1 
  -2  -4  -1 12.1146 1.79109   6 
   2   4   1 13.6886 1.87325   1 
   2   4   1 14.5653 2.11993   5 
   2   4   1 16.6331 1.78898   2 
   2   4   1 12.4100 1.49568   7 
   2   4   1 17.7156 1.85958   2 
  -3  -4  -1 24.4042 2.45604   6 
  -3  -4  -1 23.4122 2.52838   1 
   3   4   1 22.5118 2.09897   2 
   3   4   1 21.2297 2.53017   5 
   3   4   1 20.4189 2.29757   1 
   3   4   1 21.2547 2.06518   2 
   3   4   1 27.5496 2.19065   7 
  -4  -4  -1 6.30417 1.64452   6 
  -4  -4  -1 6.44987 1.89474   1 
   4   4   1 9.46654 2.17229   5 
   4   4   1 7.40497 1.61107   2 
   4   4   1 6.57159 1.68486   1 
   4   4   1 7.46042 1.47815   7 
   4   4   1 7.58052 1.58502   2 
  -5  -4  -1 283.899 9.53485   6 
  -5  -4  -1 282.670 10.2443   1 
   5   4   1 278.533 9.71595   2 
   5   4   1 298.382 9.43206   7 
   5   4   1 280.852 9.81074   2 
   5   4   1 274.470 10.0479   1 
   5   4   1 277.452 10.5054   5 
  -6  -4  -1 97.6680 4.70984   6 
  -6  -4  -1 110.012 5.87105   1 
   6   4   1 100.057 5.23318   2 
   6   4   1 103.876 5.91153   5 
   6   4   1 85.8686 4.92303   2 
   6   4   1 98.0206 5.43732   1 
   6   4   1 95.3987 4.81517   7 
  -7  -4  -1 131.393 5.62672   6 
  -7  -4  -1 121.067 6.76162   1 
  -7  -4  -1 137.587 7.08664   1 
   7   4   1 134.075 6.43852   2 
   7   4   1 126.858 6.56399   1 
   7   4   1 143.847 7.37320   5 
   7   4   1 128.793 6.42077   2 
   7   4   1 128.286 6.05426   7 
  -8  -4  -1 106.487 6.71062   1 
  -8  -4  -1 109.244 6.90809   1 
   8   4   1 118.958 6.45076   2 
   8   4   1 129.597 7.31050   5 
   8   4   1 106.986 6.13053   2 
   8   4   1 112.562 5.97793   7 
  -9  -4  -1 8.18200 3.14423   1 
   9   4   1 12.1830 2.87586   2 
   9   4   1 12.6239 3.88997   5 
   9   4   1 13.5324 2.95352   7 
 -10  -4  -1 21.0218 4.35303   1 
  10   4   1 28.3895 3.99427   7 
  10   4   1 21.6540 4.36408   5 
 -11  -4  -1 12.9851 4.19243   1 
  11   4   1 14.8372 3.84049   7 
 -12  -4  -1 9.85545 4.37238   1 
  12   4   1 7.11516 3.74343   7 
 -13  -4  -1 22.7236 5.32725   1 
  13   4   1 19.7983 4.82868   7 
 -14  -4  -1 82.9540 8.54595   1 
  14   4   1 79.6743 7.89525   7 
 -18   5   1 66.1247 8.29812   1 
 -17   5   1 -3.5041 4.10269   1 
  16  -5  -1 186.230 9.93227   7 
 -16   5   1 162.504 10.8525   1 
  15  -5  -1 5.48369 3.41403   7 
 -15   5   1 8.72118 4.23968   1 
  14  -5  -1 112.909 7.17655   7 
 -14   5   1 121.616 8.28727   1 
  13  -5  -1 42.7106 4.51606   7 
  13  -5  -1 46.3201 5.50746   1 
 -13   5   1 39.2464 5.15724   1 
  12  -5  -1 288.072 11.9090   1 
  12  -5  -1 307.148 11.3604   7 
 -12   5   1 308.575 10.3033   4 
 -12   5   1 322.469 12.6601   1 
  11  -5  -1 72.2787 5.10408   2 
  11  -5  -1 77.7703 5.89069   1 
  11  -5  -1 70.0560 4.72131   7 
 -11   5   1 72.6991 5.86848   1 
 -11   5   1 66.8648 4.03562   4 
  10  -5  -1 68.6485 2.65839   6 
  10  -5  -1 66.4037 4.54631   2 
  10  -5  -1 64.4809 4.20160   7 
  10  -5  -1 73.8360 4.67816   2 
  10  -5  -1 76.4235 5.73023   1 
 -10   5   1 63.4790 3.75803   4 
 -10   5   1 54.0934 4.92506   1 
   9  -5  -1 25.0386 2.88564   2 
   9  -5  -1 29.3558 2.03328   6 
   9  -5  -1 23.7546 3.16277   1 
   9  -5  -1 20.1046 2.56905   7 
   9  -5  -1 25.5936 2.86581   2 
  -9   5   1 19.0440 3.00875   1 
   8  -5  -1 19.9346 2.30261   7 
   8  -5  -1 22.3044 2.89438   1 
   8  -5  -1 24.9398 2.01244   6 
   8  -5  -1 20.4076 2.52823   2 
   8  -5  -1 28.8570 2.93943   2 
  -8   5   1 21.6418 2.96029   1 
   7  -5  -1 40.1096 3.42161   5 
   7  -5  -1 39.9722 2.44636   6 
   7  -5  -1 37.6446 3.16180   2 
   7  -5  -1 35.4372 3.28114   1 
   7  -5  -1 42.2199 3.27650   2 
   7  -5  -1 34.9176 2.76496   7 
  -7   5   1 38.3272 3.52466   1 
   6  -5  -1 1.34992 1.13045   2 
   6  -5  -1 3.65190 1.38168   2 
   6  -5  -1 2.88905 1.43998   5 
   6  -5  -1 2.60070 1.18731   7 
   6  -5  -1 3.13113 1.61057   1 
  -6   5   1 2.07466 1.49435   1 
   5  -5  -1 360.041 11.3039   2 
   5  -5  -1 381.397 11.0568   7 
   5  -5  -1 370.739 11.7122   1 
   5  -5  -1 361.646 11.5615   5 
  -5   5   1 359.248 11.7292   1 
   4  -5  -1 180.585 6.83387   1 
   4  -5  -1 193.911 6.81747   5 
   4  -5  -1 193.391 6.30535   7 
  -4   5   1 188.349 6.84607   5 
  -4   5   1 183.787 6.19155   7 
  -4   5   1 184.857 6.85334   1 
   3  -5  -1 167.447 6.31238   1 
   3  -5  -1 174.124 6.29401   5 
  -3   5   1 171.401 6.40037   1 
  -3   5   1 168.515 5.74380   7 
  -3   5   1 188.400 6.17310   2 
  -3   5   1 168.064 6.30323   5 
   2  -5  -1 509.449 15.2756   1 
   2  -5  -1 529.196 15.2869   5 
  -2   5   1 515.663 15.2965   5 
  -2   5   1 522.773 14.9845   2 
  -2   5   1 534.109 15.3620   1 
  -2   5   1 520.007 14.6327   7 
  -2   5   1 493.824 14.9088   2 
   1  -5  -1 -0.0959 1.04631   1 
   1  -5  -1 -0.5421 1.01507   5 
  -1   5   1 0.47845 1.09622   1 
  -1   5   1 4.03620 1.03657   7 
  -1   5   1 3.77758 1.06207   2 
  -1   5   1 0.07461 0.82513   2 
  -1   5   1 0.54124 1.18976   5 
   0  -5  -1 3.91665 1.40533   5 
   0  -5  -1 0.34068 1.11517   1 
   0   5   1 2.75590 1.35708   5 
   0   5   1 2.00146 1.21831   1 
   0   5   1 2.05505 0.99662   2 
   0   5   1 2.33624 0.99843   7 
   0   5   1 2.56328 1.00059   2 
  -1  -5  -1 17.1633 2.15061   1 
  -1  -5  -1 16.9802 2.24942   5 
  -1  -5  -1 21.2315 2.46461   6 
   1   5   1 22.5376 2.23136   2 
   1   5   1 23.4941 2.65022   5 
   1   5   1 23.1308 2.15908   2 
   1   5   1 19.0939 1.89164   7 
   1   5   1 16.6621 2.11746   1 
   1   5   1 20.7548 1.94304   7 
  -2  -5  -1 133.473 5.73298   6 
  -2  -5  -1 133.408 5.84549   1 
   2   5   1 143.815 6.12033   5 
   2   5   1 126.889 5.05131   7 
   2   5   1 136.372 5.41874   2 
   2   5   1 147.331 5.86368   1 
   2   5   1 137.526 5.39296   2 
  -3  -5  -1 31.3616 3.00717   6 
  -3  -5  -1 28.7076 3.00669   1 
   3   5   1 30.4853 3.23583   5 
   3   5   1 41.0972 3.24299   2 
   3   5   1 29.9868 3.07414   1 
   3   5   1 28.2582 2.47882   7 
   3   5   1 33.8516 2.84899   2 
  -4  -5  -1 26.9867 2.87053   6 
  -4  -5  -1 23.8964 2.99479   1 
   4   5   1 26.6124 2.99000   1 
   4   5   1 27.7431 2.67772   7 
   4   5   1 24.0251 2.56614   2 
   4   5   1 21.9701 2.47523   2 
   4   5   1 21.7785 3.10352   5 
  -5  -5  -1 93.5326 5.46480   1 
  -5  -5  -1 86.2537 4.73218   6 
   5   5   1 94.9383 5.63487   5 
   5   5   1 85.7851 5.13810   1 
   5   5   1 77.7347 4.45243   7 
   5   5   1 98.6469 5.04129   2 
   5   5   1 92.5644 4.97649   2 
  -6  -5  -1 79.6205 4.52470   6 
  -6  -5  -1 76.9745 5.84471   1 
   6   5   1 78.8258 4.84696   2 
   6   5   1 77.6328 5.06740   1 
   6   5   1 63.9306 4.63187   2 
   6   5   1 68.5946 5.73351   5 
   6   5   1 80.0724 4.60323   7 
  -7  -5  -1 40.1025 3.72303   6 
  -7  -5  -1 31.6963 4.22246   1 
   7   5   1 28.2237 3.34307   7 
   7   5   1 35.5603 3.79896   2 
   7   5   1 31.5097 4.38058   5 
   7   5   1 33.3286 4.12337   1 
   7   5   1 38.1376 3.89536   2 
  -8  -5  -1 110.190 7.12810   1 
  -8  -5  -1 108.034 7.05453   1 
   8   5   1 106.212 6.48137   2 
   8   5   1 115.727 6.30088   7 
   8   5   1 115.879 7.32704   5 
  -9  -5  -1 31.9088 4.72210   1 
   9   5   1 20.6626 3.57737   7 
   9   5   1 27.9804 4.79606   5 
 -10  -5  -1 13.9061 3.92379   1 
  10   5   1 5.29887 3.15970   7 
  10   5   1 10.7420 3.87020   5 
 -11  -5  -1 45.5938 6.00892   1 
  11   5   1 37.4849 5.06828   7 
 -12  -5  -1 -4.0651 3.64119   1 
  12   5   1 2.59923 3.82236   7 
 -13  -5  -1 44.8509 6.72459   1 
  13   5   1 61.7834 6.96158   7 
 -14  -5  -1 31.3425 6.28996   1 
  14   5   1 42.2878 6.70397   7 
 -19   6   1 5.50189 5.26121   1 
 -18   6   1 69.9238 8.54142   1 
 -17   6   1 6.81762 5.16668   1 
  16  -6  -1 100.999 7.73543   7 
 -16   6   1 99.1799 9.21333   1 
  15  -6  -1 60.2110 6.04425   7 
 -15   6   1 59.8234 6.90838   1 
  14  -6  -1 179.519 8.85933   7 
 -14   6   1 170.462 9.98618   1 
  13  -6  -1 140.545 7.32100   7 
  13  -6  -1 126.587 7.95721   1 
 -13   6   1 131.521 8.36823   1 
  12  -6  -1 148.329 7.24223   7 
  12  -6  -1 155.659 8.31737   1 
 -12   6   1 136.251 8.19136   1 
 -12   6   1 158.222 6.51237   4 
  11  -6  -1 18.3879 2.79542   7 
  11  -6  -1 18.8608 3.61336   1 
 -11   6   1 17.4144 2.57656   4 
 -11   6   1 14.3107 3.54846   1 
  10  -6  -1 242.990 9.88499   1 
  10  -6  -1 237.140 8.93863   7 
  10  -6  -1 232.630 9.40929   2 
  10  -6  -1 235.724 7.65023   6 
 -10   6   1 241.357 9.98886   1 
   9  -6  -1 38.1549 4.00779   1 
   9  -6  -1 45.9374 3.84660   2 
   9  -6  -1 44.3014 3.89127   2 
   9  -6  -1 39.6900 3.41492   7 
   9  -6  -1 37.9036 2.64941   6 
  -9   6   1 41.9553 4.22299   1 
   8  -6  -1 3.66850 1.56905   2 
   8  -6  -1 0.54768 1.20636   6 
   8  -6  -1 6.09601 2.11750   1 
   8  -6  -1 0.35695 1.28041   7 
   8  -6  -1 0.31707 1.31881   2 
  -8   6   1 5.22544 2.07945   1 
   7  -6  -1 58.2010 4.14347   1 
   7  -6  -1 60.3657 3.33484   6 
   7  -6  -1 52.2928 3.29229   7 
  -7   6   1 56.1782 4.09214   1 
   6  -6  -1 -0.9010 1.06922   2 
   6  -6  -1 0.41749 1.08300   7 
   6  -6  -1 0.93100 1.32321   6 
   6  -6  -1 0.01500 1.48439   1 
   6  -6  -1 -0.0289 1.31733   5 
  -6   6   1 -0.2568 1.39084   1 
   5  -6  -1 52.6827 3.02640   7 
   5  -6  -1 54.9458 3.63429   1 
   5  -6  -1 57.9521 3.50923   5 
  -5   6   1 54.1027 2.97027   7 
  -5   6   1 68.1875 3.94431   1 
  -5   6   1 56.6762 3.61303   5 
   4  -6  -1 303.262 9.52474   7 
   4  -6  -1 305.993 10.1909   5 
   4  -6  -1 309.377 10.3800   1 
  -4   6   1 312.465 10.3405   5 
  -4   6   1 310.181 10.4189   1 
  -4   6   1 308.343 9.55929   7 
   3  -6  -1 252.361 8.89096   5 
   3  -6  -1 266.337 9.06402   1 
  -3   6   1 255.382 9.01469   5 
  -3   6   1 270.653 8.73169   2 
  -3   6   1 249.912 9.00609   1 
  -3   6   1 276.903 8.41716   7 
   2  -6  -1 113.565 5.10065   1 
   2  -6  -1 109.039 4.98606   5 
  -2   6   1 107.174 4.67854   2 
  -2   6   1 113.661 5.13064   5 
  -2   6   1 110.586 5.12156   1 
  -2   6   1 119.575 4.52699   7 
  -2   6   1 119.085 4.83745   2 
   1  -6  -1 524.903 16.1478   1 
   1  -6  -1 534.833 16.2295   5 
  -1   6   1 549.931 15.8015   2 
  -1   6   1 529.508 16.1059   1 
  -1   6   1 547.914 16.3285   5 
  -1   6   1 522.180 15.3490   7 
  -1   6   1 528.734 15.7598   2 
   0  -6  -1 415.500 13.5903   6 
   0  -6  -1 425.746 13.4672   1 
   0  -6  -1 435.518 13.5528   5 
   0   6   1 416.878 13.5152   5 
   0   6   1 420.607 13.0175   2 
   0   6   1 422.516 12.5975   7 
   0   6   1 425.469 13.3732   1 
   0   6   1 420.226 12.9293   2 
  -1  -6  -1 99.1490 5.03930   6 
  -1  -6  -1 99.0818 5.08449   1 
   1   6   1 103.735 4.31464   7 
   1   6   1 101.416 4.59422   2 
   1   6   1 103.316 4.98355   1 
   1   6   1 97.5524 5.08388   5 
   1   6   1 94.9557 4.53826   2 
   1   6   1 95.5714 4.57925   2 
  -2  -6  -1 48.0151 3.91859   6 
  -2  -6  -1 38.3182 3.65780   1 
   2   6   1 48.9891 3.09796   7 
   2   6   1 51.8092 3.66732   1 
   2   6   1 52.1341 4.18406   5 
   2   6   1 48.2925 3.02020   7 
   2   6   1 46.9557 3.20494   2 
  -3  -6  -1 -0.5196 1.74965   6 
  -3  -6  -1 3.56506 1.96192   1 
   3   6   1 -0.4112 1.46132   1 
   3   6   1 -0.1568 1.16834   2 
   3   6   1 -0.9846 1.19601   2 
   3   6   1 0.88271 1.38523   7 
   3   6   1 0.05622 1.81086   5 
  -4  -6  -1 208.471 8.70594   1 
  -4  -6  -1 204.869 8.32958   6 
   4   6   1 218.698 8.47980   1 
   4   6   1 199.174 8.07038   2 
   4   6   1 209.724 8.10599   2 
   4   6   1 198.161 7.70984   7 
   4   6   1 204.631 8.85161   5 
  -5  -6  -1 15.9808 3.08380   1 
  -5  -6  -1 18.0832 2.81267   6 
   5   6   1 15.4320 3.38220   5 
   5   6   1 16.2286 2.84058   1 
   5   6   1 15.1509 2.63284   2 
   5   6   1 23.8039 3.03095   2 
   5   6   1 16.6327 2.70052   7 
  -6  -6  -1 180.042 8.66547   1 
  -6  -6  -1 187.529 7.91223   6 
   6   6   1 187.697 8.39169   1 
   6   6   1 186.597 9.02463   5 
   6   6   1 176.194 8.10337   2 
   6   6   1 186.903 7.78651   7 
   6   6   1 174.268 7.98041   2 
  -7  -6  -1 22.8511 3.84754   1 
  -7  -6  -1 26.7228 3.43701   6 
   7   6   1 26.1014 3.52825   2 
   7   6   1 16.1999 3.10118   7 
   7   6   1 17.0348 3.82633   5 
  -8  -6  -1 23.0812 4.11770   1 
  -8  -6  -1 24.5754 4.20808   1 
   8   6   1 22.6337 3.68834   7 
   8   6   1 11.4746 3.69529   5 
  -9  -6  -1 31.3842 4.98773   1 
   9   6   1 33.6481 5.18074   5 
   9   6   1 32.7891 4.42885   7 
 -10  -6  -1 86.0783 7.69208   1 
  10   6   1 88.2332 7.00882   7 
 -11  -6  -1 15.8743 4.61562   1 
  11   6   1 15.0636 4.26882   7 
 -12  -6  -1 57.6806 7.28256   1 
  12   6   1 58.3596 6.77791   7 
 -13  -6  -1 2.31819 4.66708   1 
  13   6   1 14.8802 5.25210   7 
 -19   7   1 5.30193 5.32718   1 
 -18   7   1 31.3116 6.96991   1 
 -17   7   1 40.7274 7.01712   1 
 -16   7   1 36.1063 6.23652   1 
  15  -7  -1 51.5260 5.72108   7 
 -15   7   1 46.7238 6.44372   1 
  14  -7  -1 96.9599 6.98116   7 
  14  -7  -1 109.184 7.69325   1 
 -14   7   1 101.459 8.35093   1 
  13  -7  -1 10.3658 2.98388   7 
  13  -7  -1 8.66104 3.29606   1 
 -13   7   1 11.5543 3.81476   1 
  12  -7  -1 40.9378 4.28168   7 
  12  -7  -1 38.9322 4.75954   1 
 -12   7   1 51.5252 4.19234   4 
 -12   7   1 45.7095 5.15387   1 
  11  -7  -1 43.8446 4.78181   1 
  11  -7  -1 39.1458 2.91347   6 
  11  -7  -1 38.2328 3.89090   7 
 -11   7   1 35.0857 4.68661   1 
  10  -7  -1 60.6127 4.42040   7 
  10  -7  -1 54.8955 3.35870   6 
  10  -7  -1 52.9559 5.00936   1 
 -10   7   1 57.3494 5.21833   1 
   9  -7  -1 44.0605 3.77330   7 
   9  -7  -1 33.8352 3.92319   1 
   9  -7  -1 43.5234 3.97590   2 
   9  -7  -1 40.5295 2.98458   6 
  -9   7   1 39.0005 4.28882   1 
   8  -7  -1 0.97785 1.33447   7 
   8  -7  -1 -2.3595 1.65116   1 
   8  -7  -1 0.03222 1.38166   2 
   8  -7  -1 0.64309 1.44244   6 
  -8   7   1 -0.6876 1.88204   1 
   7  -7  -1 32.8528 3.54807   1 
   7  -7  -1 23.6832 2.73209   6 
   7  -7  -1 25.0858 2.59236   7 
  -7   7   1 30.2067 2.97618   7 
  -7   7   1 28.7014 3.45775   1 
   6  -7  -1 12.1725 2.04307   6 
   6  -7  -1 13.0748 1.85047   7 
   6  -7  -1 14.3545 2.55555   1 
  -6   7   1 15.3125 2.51889   1 
  -6   7   1 15.3610 1.92953   7 
   5  -7  -1 -1.2693 1.43254   1 
   5  -7  -1 2.60982 1.54333   6 
   5  -7  -1 1.52635 1.19282   7 
  -5   7   1 -1.0021 1.39590   5 
  -5   7   1 1.02605 1.50319   1 
  -5   7   1 -0.5371 1.07888   7 
   4  -7  -1 119.882 5.49175   5 
   4  -7  -1 117.428 5.55969   1 
   4  -7  -1 108.667 5.44100   6 
  -4   7   1 118.365 4.87285   7 
  -4   7   1 122.829 5.72516   1 
  -4   7   1 117.006 5.53206   5 
  -4   7   1 125.490 5.25007   2 
   3  -7  -1 27.1259 2.86183   5 
   3  -7  -1 39.3220 3.53584   6 
   3  -7  -1 33.3980 3.27941   1 
  -3   7   1 35.8963 2.78050   7 
  -3   7   1 31.6669 3.14527   5 
  -3   7   1 35.5260 3.32331   1 
  -3   7   1 27.9227 2.60594   2 
  -3   7   1 31.6944 2.80961   2 
   2  -7  -1 393.251 12.9454   1 
   2  -7  -1 397.021 13.2300   6 
   2  -7  -1 404.382 13.7138   5 
  -2   7   1 402.776 13.0407   5 
  -2   7   1 379.596 12.4078   2 
  -2   7   1 401.059 12.9303   1 
  -2   7   1 406.174 12.1366   7 
  -2   7   1 388.657 12.4820   2 
   1  -7  -1 15.9408 2.55702   6 
   1  -7  -1 16.5860 2.43561   1 
  -1   7   1 14.7238 2.03483   2 
  -1   7   1 13.2195 2.40885   5 
  -1   7   1 13.2662 1.95710   7 
  -1   7   1 12.2021 2.13078   1 
  -1   7   1 14.1196 2.10641   2 
   0  -7  -1 148.523 6.63453   1 
   0  -7  -1 145.330 6.72404   6 
   0   7   1 142.057 6.33461   1 
   0   7   1 150.547 6.15541   2 
   0   7   1 152.654 5.79922   7 
   0   7   1 148.648 6.68744   5 
   0   7   1 150.133 6.14136   2 
  -1  -7  -1 0.99396 1.69616   1 
  -1  -7  -1 1.29902 1.71772   6 
   1   7   1 2.28142 1.40102   2 
   1   7   1 1.13529 1.21147   2 
   1   7   1 -2.2236 1.10602   7 
   1   7   1 0.38090 1.17487   2 
   1   7   1 0.47039 1.39416   1 
   1   7   1 2.09978 1.81482   5 
  -2  -7  -1 226.428 8.95307   6 
  -2  -7  -1 203.930 8.75195   1 
   2   7   1 221.936 8.37187   2 
   2   7   1 216.606 9.06105   5 
   2   7   1 216.647 8.43895   2 
   2   7   1 231.571 8.39563   2 
   2   7   1 228.053 8.02846   7 
   2   7   1 216.716 7.93569   7 
   2   7   1 208.043 8.59588   1 
  -3  -7  -1 82.6893 5.38707   6 
  -3  -7  -1 86.2082 5.61702   1 
   3   7   1 93.4643 5.11861   2 
   3   7   1 91.7527 4.78204   7 
   3   7   1 83.8208 4.62855   7 
   3   7   1 87.3747 5.60577   5 
   3   7   1 87.8913 5.26420   1 
   3   7   1 96.5242 5.10789   2 
  -4  -7  -1 104.538 6.28655   1 
  -4  -7  -1 120.380 6.33616   6 
   4   7   1 111.585 5.79193   2 
   4   7   1 105.155 5.78936   2 
   4   7   1 97.0404 5.81110   1 
   4   7   1 108.920 5.53222   7 
   4   7   1 115.185 6.59810   5 
  -5  -7  -1 45.2059 4.83850   1 
  -5  -7  -1 38.6661 4.26360   6 
   5   7   1 41.3218 4.03400   2 
   5   7   1 39.9601 3.85945   7 
   5   7   1 35.6405 4.02188   2 
   5   7   1 48.0490 5.13040   5 
   5   7   1 48.7675 4.59924   1 
  -6  -7  -1 309.862 12.4106   1 
  -6  -7  -1 286.333 11.4655   6 
   6   7   1 300.585 11.8927   2 
   6   7   1 326.268 12.9721   5 
   6   7   1 308.372 11.3360   7 
  -7  -7  -1 7.84130 3.23982   1 
  -7  -7  -1 5.85213 2.65570   6 
   7   7   1 3.80148 2.76505   7 
   7   7   1 1.67062 2.95030   5 
  -8  -7  -1 36.3927 5.19621   1 
  -8  -7  -1 31.1711 4.79987   1 
   8   7   1 31.8695 5.18562   5 
   8   7   1 22.0757 3.89341   7 
  -9  -7  -1 27.6175 5.16438   1 
  -9  -7  -1 24.3959 4.74944   1 
   9   7   1 26.1633 4.35196   7 
 -10  -7  -1 43.2734 6.05608   1 
  10   7   1 51.4873 5.86367   7 
 -11  -7  -1 38.9375 6.35363   1 
  11   7   1 37.4736 5.84719   7 
 -12  -7  -1 15.6807 5.54949   1 
  12   7   1 39.4443 6.13296   7 
 -19   8   1 2.35386 5.41789   1 
 -18   8   1 5.95948 5.43095   1 
 -17   8   1 32.6358 6.61395   1 
 -16   8   1 7.28230 4.48355   1 
 -15   8   1 76.8986 8.09732   1 
  14  -8  -1 71.4177 6.20463   7 
  14  -8  -1 67.9801 6.66845   1 
 -14   8   1 65.6939 6.86849   1 
  13  -8  -1 7.83395 3.05015   7 
  13  -8  -1 9.97161 3.50731   1 
 -13   8   1 4.17130 3.44186   1 
 -13   8   1 7.66492 2.50479   4 
  12  -8  -1 7.48303 3.24196   1 
  12  -8  -1 5.08343 2.63820   7 
 -12   8   1 4.49866 3.10061   1 
  11  -8  -1 62.8506 5.81330   1 
  11  -8  -1 70.9353 4.06444   6 
  11  -8  -1 68.2103 5.33661   7 
 -11   8   1 63.9845 6.01317   1 
  10  -8  -1 38.4173 4.71144   1 
  10  -8  -1 42.3799 4.04022   7 
  10  -8  -1 49.2803 3.80932   6 
 -10   8   1 40.4069 4.89074   1 
   9  -8  -1 6.29313 2.61587   1 
   9  -8  -1 5.99381 1.99325   6 
   9  -8  -1 6.08000 1.99187   7 
  -9   8   1 5.34453 2.55857   1 
   8  -8  -1 0.08622 1.64978   6 
   8  -8  -1 -0.5942 1.33428   7 
   8  -8  -1 -1.4129 2.10044   1 
  -8   8   1 1.73214 2.17376   1 
  -8   8   1 -1.5096 1.26841   7 
   7  -8  -1 2.72407 1.83641   6 
   7  -8  -1 3.88796 2.18435   1 
   7  -8  -1 2.87962 0.61330   3 
   7  -8  -1 0.54961 1.36841   7 
  -7   8   1 3.11040 2.16637   1 
  -7   8   1 0.41433 1.27467   7 
   6  -8  -1 41.2540 3.75558   6 
   6  -8  -1 44.4450 4.25196   1 
   6  -8  -1 38.3184 3.11195   7 
  -6   8   1 42.5331 3.94882   5 
  -6   8   1 32.6291 3.65967   1 
  -6   8   1 36.1121 3.05120   7 
   5  -8  -1 30.6872 3.30440   6 
   5  -8  -1 23.2065 2.40519   7 
   5  -8  -1 27.8053 3.32691   1 
  -5   8   1 18.3655 2.74695   5 
  -5   8   1 23.0862 2.48017   7 
  -5   8   1 24.6434 3.16830   1 
   4  -8  -1 15.1183 2.65678   1 
   4  -8  -1 10.5909 2.35920   6 
  -4   8   1 13.5247 2.40310   1 
  -4   8   1 14.7117 2.06970   7 
  -4   8   1 10.3065 2.28398   5 
  -4   8   1 14.4400 2.14513   2 
   3  -8  -1 13.8239 2.38602   6 
   3  -8  -1 11.8431 2.54234   1 
  -3   8   1 11.4293 2.47049   5 
  -3   8   1 16.1328 2.68044   1 
  -3   8   1 13.8782 2.10976   7 
  -3   8   1 12.5979 2.06288   2 
  -3   8   1 16.2755 2.29372   2 
   2  -8  -1 253.777 9.98964   6 
   2  -8  -1 237.987 9.55302   1 
  -2   8   1 278.908 9.96321   1 
  -2   8   1 265.461 9.29509   2 
  -2   8   1 255.649 9.78272   5 
  -2   8   1 260.963 9.28289   2 
  -2   8   1 258.941 8.86278   7 
   1  -8  -1 47.9612 4.20699   1 
   1  -8  -1 29.4123 3.58698   6 
  -1   8   1 37.2084 3.82118   5 
  -1   8   1 42.8796 3.99926   1 
  -1   8   1 37.7421 3.35215   2 
  -1   8   1 30.8393 2.97589   2 
  -1   8   1 34.2635 3.03624   7 
   0  -8  -1 61.7307 4.56190   6 
   0  -8  -1 63.3241 4.99928   1 
   0   8   1 65.4202 3.89848   7 
   0   8   1 61.2321 4.36716   1 
   0   8   1 64.5274 4.11858   2 
   0   8   1 61.8924 3.99201   2 
   0   8   1 59.3436 4.92728   5 
  -1  -8  -1 80.3814 5.30298   6 
  -1  -8  -1 83.3352 5.45107   1 
   1   8   1 83.2347 5.19846   1 
   1   8   1 84.9500 4.86863   2 
   1   8   1 71.8419 4.64079   2 
   1   8   1 92.6738 5.58695   5 
   1   8   1 89.9741 4.64881   7 
  -2  -8  -1 459.955 15.8497   1 
  -2  -8  -1 452.410 15.8597   6 
   2   8   1 447.320 15.1249   2 
   2   8   1 475.953 15.1798   2 
   2   8   1 460.767 16.0504   5 
   2   8   1 476.828 14.7392   7 
   2   8   1 458.581 15.1946   2 
   2   8   1 487.953 15.7223   1 
  -3  -8  -1 7.26416 2.88599   1 
  -3  -8  -1 6.33009 2.62225   6 
   3   8   1 6.05012 1.99208   2 
   3   8   1 1.78786 1.95992   7 
   3   8   1 7.57815 2.18309   2 
   3   8   1 7.48133 2.80198   5 
   3   8   1 1.93493 1.92891   7 
   3   8   1 5.91917 2.21363   2 
   3   8   1 5.28977 2.35133   1 
  -4  -8  -1 200.147 9.37441   6 
  -4  -8  -1 216.254 9.80464   1 
   4   8   1 208.311 8.58027   7 
   4   8   1 215.986 9.96467   5 
   4   8   1 211.868 8.63914   7 
   4   8   1 209.191 9.27894   1 
   4   8   1 229.035 9.31912   2 
  -5  -8  -1 138.786 7.86324   1 
  -5  -8  -1 144.480 7.60395   6 
   5   8   1 144.886 7.02112   7 
   5   8   1 126.655 7.83854   5 
   5   8   1 123.631 7.10771   2 
  -6  -8  -1 104.362 6.67255   6 
  -6  -8  -1 102.954 7.16985   1 
   6   8   1 108.342 6.51218   7 
   6   8   1 103.477 7.33812   5 
  -7  -8  -1 54.6354 6.12792   1 
  -7  -8  -1 71.2226 6.05674   6 
   7   8   1 54.5990 6.32902   5 
   7   8   1 54.0181 5.28845   7 
  -8  -8  -1 -0.0119 3.25225   1 
  -8  -8  -1 2.87865 3.63580   1 
   8   8   1 2.84427 3.13066   7 
  -9  -8  -1 34.1785 5.54934   1 
  -9  -8  -1 43.7902 6.28112   1 
   9   8   1 39.9759 5.42268   7 
 -10  -8  -1 105.173 9.01678   1 
  10   8   1 104.560 8.38767   7 
 -11  -8  -1 63.0817 7.80431   1 
  11   8   1 59.8879 6.99779   7 
 -19   9   1 8.90177 5.72258   1 
 -18   9   1 -3.9766 4.65375   1 
 -17   9   1 8.80338 5.02997   1 
 -16   9   1 12.5770 5.13845   1 
  15  -9  -1 16.8736 5.53883   1 
 -15   9   1 30.9628 5.68599   1 
  14  -9  -1 28.4747 4.80140   1 
 -14   9   1 25.0113 5.15831   1 
  13  -9  -1 0.42088 3.14594   1 
 -13   9   1 1.88204 3.57551   1 
  12  -9  -1 5.34103 2.68345   7 
  12  -9  -1 10.1161 3.60597   1 
 -12   9   1 3.31702 3.12518   1 
  11  -9  -1 0.24360 1.78460   6 
  11  -9  -1 -0.9911 2.64620   1 
  11  -9  -1 5.41592 2.35109   7 
 -11   9   1 -2.1687 2.50940   1 
  10  -9  -1 -0.4362 2.44119   1 
  10  -9  -1 0.56715 1.94250   7 
  10  -9  -1 1.04914 1.94447   6 
 -10   9   1 1.87584 2.79774   1 
   9  -9  -1 40.1215 3.84843   7 
   9  -9  -1 37.8870 4.36346   1 
   9  -9  -1 38.8061 3.95534   6 
  -9   9   1 45.5234 5.04702   1 
   8  -9  -1 1.85815 1.62823   7 
   8  -9  -1 2.22312 2.39578   1 
   8  -9  -1 2.48856 1.90937   6 
  -8   9   1 1.66398 2.37804   1 
   7  -9  -1 -1.5535 2.06577   1 
   7  -9  -1 0.27588 1.85006   6 
   7  -9  -1 -0.1279 1.40771   7 
  -7   9   1 2.90228 2.23462   1 
  -7   9   1 2.81049 1.64022   7 
   6  -9  -1 -1.4772 1.73381   6 
   6  -9  -1 -0.1874 1.33972   7 
   6  -9  -1 -2.0384 1.92679   1 
  -6   9   1 1.06995 1.97655   5 
  -6   9   1 -0.1200 1.37323   7 
  -6   9   1 -1.4146 1.92682   1 
   5  -9  -1 10.9469 2.62964   1 
   5  -9  -1 6.44555 2.34960   6 
  -5   9   1 8.11725 1.93383   2 
  -5   9   1 8.49607 2.42329   5 
  -5   9   1 9.80958 2.55760   1 
  -5   9   1 12.4319 2.16267   7 
   4  -9  -1 184.906 8.35564   6 
   4  -9  -1 185.005 8.29538   1 
  -4   9   1 196.475 8.31942   1 
  -4   9   1 175.965 8.07361   5 
  -4   9   1 175.846 7.13950   7 
  -4   9   1 186.600 8.36908   2 
  -4   9   1 195.062 7.69972   2 
   3  -9  -1 97.6579 5.89098   6 
   3  -9  -1 90.5237 5.71011   1 
  -3   9   1 96.8310 5.67299   5 
  -3   9   1 99.5989 5.19700   2 
  -3   9   1 101.315 5.23135   2 
  -3   9   1 94.3116 4.81392   7 
  -3   9   1 97.4911 5.60040   1 
   2  -9  -1 183.979 8.57527   6 
   2  -9  -1 205.951 8.66588   1 
  -2   9   1 186.657 7.81377   2 
  -2   9   1 197.680 8.52237   5 
  -2   9   1 186.090 8.30919   1 
  -2   9   1 199.936 7.53185   7 
  -2   9   1 194.810 7.86713   2 
   1  -9  -1 184.454 8.26194   1 
   1  -9  -1 186.020 8.57589   6 
  -1   9   1 179.137 8.00772   1 
  -1   9   1 184.302 7.24253   7 
  -1   9   1 175.524 7.58661   2 
  -1   9   1 187.256 8.35681   5 
  -1   9   1 170.418 7.48966   2 
   0  -9  -1 272.955 11.2432   6 
   0  -9  -1 282.138 11.1263   1 
   0   9   1 292.022 11.2676   5 
   0   9   1 274.415 10.4006   2 
   0   9   1 285.172 9.98348   7 
   0   9   1 279.520 10.7767   1 
   0   9   1 279.857 10.4175   2 
  -1  -9  -1 13.3347 3.21729   6 
  -1  -9  -1 11.2469 2.93248   1 
   1   9   1 14.7369 3.12893   5 
   1   9   1 6.34277 2.28151   2 
   1   9   1 13.0185 2.89515   1 
   1   9   1 9.58740 2.31289   2 
   1   9   1 12.2692 2.37324   7 
  -2  -9  -1 313.613 12.3831   1 
  -2  -9  -1 299.627 12.2803   6 
   2   9   1 321.997 11.7644   2 
   2   9   1 323.207 11.2801   7 
   2   9   1 320.225 12.5670   5 
   2   9   1 311.101 12.0259   1 
  -3  -9  -1 36.6764 4.52413   6 
  -3  -9  -1 46.8161 5.24167   1 
   3   9   1 34.6099 3.72354   7 
   3   9   1 29.4734 4.36042   5 
   3   9   1 35.1740 4.09776   2 
   3   9   1 36.5448 4.28804   1 
  -4  -9  -1 73.9126 6.38701   6 
  -4  -9  -1 76.9376 6.44391   1 
   4   9   1 67.2911 5.36378   7 
   4   9   1 73.3816 6.64028   5 
   4   9   1 84.5052 5.52450   7 
  -5  -9  -1 0.37729 3.17750   6 
  -5  -9  -1 -0.4058 2.77675   1 
   5   9   1 1.92787 2.46486   7 
   5   9   1 1.72732 2.88951   5 
   5   9   1 4.99651 2.65391   7 
  -6  -9  -1 94.7040 7.60837   1 
  -6  -9  -1 106.647 7.12704   6 
   6   9   1 86.0611 6.51390   7 
   6   9   1 105.311 6.86842   7 
   6   9   1 81.4397 7.53430   5 
  -7  -9  -1 27.2734 4.96369   1 
   7   9   1 31.2872 4.62942   7 
   7   9   1 24.9460 4.46280   7 
  -8  -9  -1 49.2299 6.32338   1 
  -8  -9  -1 25.5370 5.20125   1 
   8   9   1 40.0704 5.33693   7 
   8   9   1 44.7389 5.41286   7 
  -9  -9  -1 48.5424 6.77624   1 
  -9  -9  -1 40.6818 6.09831   1 
   9   9   1 52.6296 5.99075   7 
   9   9   1 44.4485 6.02195   7 
 -10  -9  -1 31.5570 6.09350   1 
  10   9   1 29.0942 5.41398   7 
  10   9   1 29.5400 5.79148   7 
 -19  10   1 7.08798 5.85012   1 
 -18  10   1 3.58399 5.46406   1 
 -17  10   1 -4.6253 4.09974   1 
 -16  10   1 12.9686 5.27754   1 
  15 -10  -1 17.9198 4.85684   1 
 -15  10   1 29.6065 5.65145   1 
  14 -10  -1 -1.5641 3.35701   1 
 -14  10   1 3.99542 3.91231   1 
  13 -10  -1 6.03171 3.46897   1 
 -13  10   1 11.9488 3.95615   1 
  12 -10  -1 21.6739 3.25920   6 
  12 -10  -1 26.3413 4.59724   1 
 -12  10   1 25.1443 4.71097   1 
  11 -10  -1 7.73572 2.60651   6 
  11 -10  -1 9.39294 3.45901   1 
 -11  10   1 9.00058 3.52867   1 
  10 -10  -1 1.14027 1.95082   6 
  10 -10  -1 -0.0230 2.76362   1 
 -10  10   1 0.20098 2.65319   1 
   9 -10  -1 35.4748 4.08738   6 
   9 -10  -1 38.6731 4.88678   1 
  -9  10   1 39.4522 4.88020   1 
   8 -10  -1 16.5730 3.14724   6 
   8 -10  -1 18.6699 3.54717   1 
  -8  10   1 12.5058 3.31229   1 
   7 -10  -1 44.0587 4.74840   1 
   7 -10  -1 48.5740 4.77663   6 
  -7  10   1 40.0719 4.43531   5 
  -7  10   1 38.9974 3.71590   7 
  -7  10   1 43.9548 5.01873   1 
   6 -10  -1 180.274 8.49324   6 
   6 -10  -1 187.329 8.76402   1 
  -6  10   1 172.212 7.31220   7 
  -6  10   1 195.469 8.66903   5 
  -6  10   1 176.812 8.53676   1 
   5 -10  -1 85.0286 5.82568   6 
   5 -10  -1 98.7003 6.22627   1 
  -5  10   1 87.2424 5.74326   5 
  -5  10   1 88.9661 4.90583   7 
  -5  10   1 80.7541 5.65381   1 
   4 -10  -1 184.815 8.85453   6 
   4 -10  -1 197.791 8.93545   1 
  -4  10   1 175.604 8.43484   1 
  -4  10   1 195.315 7.64401   7 
  -4  10   1 196.691 8.74110   5 
   3 -10  -1 129.637 7.27199   1 
   3 -10  -1 149.227 7.70967   6 
  -3  10   1 128.240 7.07289   5 
  -3  10   1 142.477 7.36176   1 
  -3  10   1 141.138 6.29204   7 
  -3  10   1 127.484 6.51000   2 
   2 -10  -1 232.792 10.6141   6 
   2 -10  -1 234.503 10.2885   1 
  -2  10   1 283.293 9.63653   7 
  -2  10   1 263.131 9.94375   2 
  -2  10   1 253.290 10.3446   1 
  -2  10   1 251.446 10.5106   5 
   1 -10  -1 24.5859 4.07029   6 
   1 -10  -1 25.9259 4.02856   1 
  -1  10   1 30.5820 4.00511   1 
  -1  10   1 23.8213 3.11379   7 
  -1  10   1 21.0930 3.12018   2 
  -1  10   1 28.4843 4.01260   5 
   0 -10  -1 381.196 14.2819   6 
   0 -10  -1 385.686 13.9655   1 
   0  10   1 361.710 12.5270   7 
   0  10   1 339.648 13.2846   1 
   0  10   1 344.987 12.9006   2 
   0  10   1 381.781 13.9974   5 
  -1 -10  -1 64.8040 5.80910   1 
  -1 -10  -1 81.2031 6.59732   6 
   1  10   1 76.9752 5.00507   7 
   1  10   1 62.4696 5.84464   2 
   1  10   1 70.5107 5.99214   1 
   1  10   1 60.9497 6.03912   5 
  -2 -10  -1 187.604 9.26417   1 
  -2 -10  -1 179.974 9.25546   6 
   2  10   1 176.457 8.80239   1 
   2  10   1 173.533 9.20221   5 
   2  10   1 193.125 8.27925   7 
  -3 -10  -1 12.1336 3.96637   6 
  -3 -10  -1 10.1769 3.51426   1 
   3  10   1 14.1983 3.08885   7 
   3  10   1 12.9587 3.88019   5 
  -4 -10  -1 79.7038 7.01034   6 
  -4 -10  -1 64.2024 6.31284   1 
   4  10   1 77.9358 7.03964   5 
   4  10   1 65.5567 5.55768   7 
  -5 -10  -1 0.61981 3.40679   6 
  -5 -10  -1 4.27241 3.58486   1 
   5  10   1 0.36242 2.80363   7 
   5  10   1 1.51620 3.22911   5 
  -6 -10  -1 58.3744 6.63659   1 
  -6 -10  -1 47.3249 5.85071   6 
   6  10   1 56.0067 5.76405   7 
  -7 -10  -1 78.3875 7.71969   1 
   7  10   1 80.3767 6.84385   7 
   7  10   1 75.1458 6.79956   7 
  -8 -10  -1 17.1031 5.23854   1 
  -8 -10  -1 23.5289 5.43881   1 
   8  10   1 17.0446 4.69494   7 
   8  10   1 22.6919 5.03239   7 
  -9 -10  -1 47.8524 7.01012   1 
  -9 -10  -1 37.2645 6.65947   1 
   9  10   1 40.8963 5.96243   7 
   9  10   1 35.9136 5.80626   7 
 -19  11   1 -0.1329 5.63301   1 
 -18  11   1 12.3361 6.12203   1 
 -17  11   1 7.94292 5.18979   1 
 -16  11   1 9.59175 5.06973   1 
  15 -11  -1 42.7274 6.23786   1 
 -15  11   1 37.6595 6.69982   1 
  14 -11  -1 1.74126 3.77324   1 
 -14  11   1 -0.6642 3.93044   1 
  13 -11  -1 -2.0919 3.42776   1 
 -13  11   1 2.58945 3.59730   1 
  12 -11  -1 0.06948 2.39771   6 
  12 -11  -1 -0.2586 3.25602   1 
 -12  11   1 3.62106 3.66423   1 
  11 -11  -1 55.0941 6.34216   1 
  11 -11  -1 44.7889 4.83551   6 
 -11  11   1 48.2621 5.84240   1 
  10 -11  -1 5.62822 2.90628   6 
  10 -11  -1 12.5069 3.69986   1 
 -10  11   1 12.6093 3.76922   1 
   9 -11  -1 42.7768 5.26066   1 
   9 -11  -1 36.8506 4.39029   6 
  -9  11   1 32.5378 4.90365   1 
   8 -11  -1 2.96172 2.60116   6 
   8 -11  -1 2.40843 3.08468   1 
  -8  11   1 6.69807 2.94115   1 
   7 -11  -1 38.1795 4.85333   1 
   7 -11  -1 40.7486 4.79222   6 
  -7  11   1 38.0787 4.92714   1 
  -7  11   1 40.4269 4.71990   5 
  -7  11   1 43.0506 4.07622   7 
   6 -11  -1 96.6398 6.47487   1 
   6 -11  -1 86.4324 6.25089   6 
  -6  11   1 88.5572 6.16505   5 
  -6  11   1 93.3837 5.24062   7 
  -6  11   1 90.3475 6.28058   1 
   5 -11  -1 55.6048 5.61682   6 
   5 -11  -1 69.0451 6.14408   1 
  -5  11   1 64.0492 6.00781   1 
  -5  11   1 68.9279 5.05317   7 
  -5  11   1 60.9678 5.53171   5 
   4 -11  -1 229.507 10.1321   1 
   4 -11  -1 224.485 10.4046   6 
  -4  11   1 225.414 10.1251   1 
  -4  11   1 225.431 8.91511   7 
  -4  11   1 230.517 10.3135   5 
   3 -11  -1 44.6933 5.27010   6 
   3 -11  -1 45.2787 5.00300   1 
  -3  11   1 42.5761 4.10408   7 
  -3  11   1 47.0150 5.06218   5 
  -3  11   1 52.6801 5.34881   1 
   2 -11  -1 217.468 10.4014   6 
   2 -11  -1 220.391 10.1015   1 
  -2  11   1 203.701 8.64544   7 
  -2  11   1 222.602 9.87446   1 
  -2  11   1 214.315 9.91298   5 
   1 -11  -1 12.8149 3.64626   1 
   1 -11  -1 5.20690 3.26520   6 
  -1  11   1 16.5790 3.48471   1 
  -1  11   1 10.7855 3.27414   5 
  -1  11   1 16.1151 2.99219   7 
   0 -11  -1 422.101 15.7502   1 
   0 -11  -1 407.682 15.9671   6 
   0  11   1 421.430 15.3709   1 
   0  11   1 414.088 15.7874   5 
   0  11   1 417.042 14.3362   7 
  -1 -11  -1 2.67714 3.01812   1 
  -1 -11  -1 1.17946 3.06310   6 
   1  11   1 6.17970 2.70572   7 
   1  11   1 3.46496 2.89003   5 
  -2 -11  -1 104.858 7.49014   6 
  -2 -11  -1 114.977 7.68474   1 
   2  11   1 93.8076 6.27122   7 
   2  11   1 96.3220 7.88415   5 
  -3 -11  -1 4.96399 3.66424   1 
  -3 -11  -1 13.7162 4.03843   6 
   3  11   1 13.4412 3.34598   7 
   3  11   1 14.4891 3.94158   5 
  -4 -11  -1 24.6678 4.89654   1 
  -4 -11  -1 30.3242 5.12699   6 
   4  11   1 21.6460 4.05727   7 
  -5 -11  -1 91.3678 8.16519   6 
  -5 -11  -1 78.4731 7.56354   1 
   5  11   1 89.4263 6.95136   7 
  -6 -11  -1 114.073 8.38753   6 
  -6 -11  -1 116.243 9.30410   1 
   6  11   1 96.3279 7.65828   7 
  -7 -11  -1 80.4021 8.14571   1 
   7  11   1 77.9467 7.17349   7 
  -8 -11  -1 6.23618 5.11212   1 
  -8 -11  -1 12.6436 5.30205   1 
   8  11   1 12.2387 4.45752   7 
 -18  12   1 0.57000 5.04976   1 
 -17  12   1 -0.7969 4.92998   1 
 -16  12   1 -3.6643 4.21994   1 
  15 -12  -1 1.63881 3.90274   1 
 -15  12   1 -9.2298 3.67150   1 
  14 -12  -1 -1.3620 3.94055   1 
 -14  12   1 0.31639 3.81327   1 
  13 -12  -1 19.2027 4.87913   1 
 -13  12   1 30.4640 5.43769   1 
  12 -12  -1 5.74430 3.98921   1 
  12 -12  -1 -2.0065 2.57526   6 
 -12  12   1 -0.5748 3.40795   1 
  11 -12  -1 148.531 8.12410   6 
  11 -12  -1 163.121 9.72781   1 
 -11  12   1 163.826 9.79850   1 
  10 -12  -1 41.9638 5.00054   6 
  10 -12  -1 44.3730 5.78223   1 
 -10  12   1 52.2580 6.10194   1 
   9 -12  -1 132.854 8.11288   1 
   9 -12  -1 126.385 7.49869   6 
  -9  12   1 114.662 8.06133   1 
   8 -12  -1 27.6659 4.70544   1 
   8 -12  -1 33.0254 4.69374   6 
  -8  12   1 34.2074 4.76057   5 
  -8  12   1 25.0560 4.49598   1 
   7 -12  -1 4.17599 3.17175   6 
   7 -12  -1 1.30967 3.20083   1 
  -7  12   1 4.93631 3.19771   1 
  -7  12   1 4.49976 2.92157   5 
   6 -12  -1 47.2087 5.47152   6 
   6 -12  -1 45.0318 5.24405   1 
  -6  12   1 34.3853 4.67084   5 
  -6  12   1 48.0926 5.47856   1 
  -6  12   1 34.1493 3.90896   7 
   5 -12  -1 -1.1629 2.63381   6 
   5 -12  -1 4.65793 3.03917   1 
  -5  12   1 2.03831 2.64889   5 
  -5  12   1 0.09118 2.14026   7 
  -5  12   1 3.22425 2.89078   1 
   4 -12  -1 222.218 10.6567   6 
   4 -12  -1 203.902 10.0221   1 
  -4  12   1 218.014 10.2599   1 
  -4  12   1 220.128 9.00241   7 
  -4  12   1 200.992 9.98790   5 
   3 -12  -1 5.22197 3.41815   6 
   3 -12  -1 3.30938 3.07867   1 
  -3  12   1 6.51483 2.53688   7 
  -3  12   1 9.01585 3.24960   5 
  -3  12   1 0.92212 2.92705   1 
   2 -12  -1 240.381 11.2874   1 
   2 -12  -1 247.332 11.6556   6 
  -2  12   1 261.730 10.0782   7 
  -2  12   1 219.372 10.6290   1 
  -2  12   1 241.803 11.1628   5 
   1 -12  -1 4.87109 3.28948   1 
   1 -12  -1 1.12710 3.34679   6 
  -1  12   1 4.62304 3.14912   5 
  -1  12   1 3.57648 2.83746   1 
  -1  12   1 3.99703 2.60629   7 
   0 -12  -1 259.894 12.3325   6 
   0 -12  -1 257.305 12.0157   1 
   0  12   1 257.136 10.7337   7 
   0  12   1 275.621 12.3015   5 
  -1 -12  -1 5.71400 3.77369   1 
  -1 -12  -1 10.3507 4.14675   6 
   1  12   1 10.3788 3.24389   7 
   1  12   1 12.5572 3.96900   5 
  -2 -12  -1 70.0854 7.35454   6 
  -2 -12  -1 70.1625 6.98495   1 
   2  12   1 76.5439 7.40588   5 
   2  12   1 80.4006 6.29909   7 
  -3 -12  -1 17.9803 4.47273   1 
  -3 -12  -1 26.4797 5.56184   6 
   3  12   1 16.0247 3.96930   7 
  -4 -12  -1 52.9877 6.91071   6 
  -4 -12  -1 35.4933 5.74581   1 
   4  12   1 40.8159 5.36226   7 
  -5 -12  -1 41.5903 5.99677   1 
  -5 -12  -1 30.2736 5.95524   6 
   5  12   1 32.4977 5.15661   7 
  -6 -12  -1 52.7362 7.22680   1 
   6  12   1 57.1238 6.48523   7 
  -7 -12  -1 23.1301 5.54945   1 
   7  12   1 26.4842 5.45206   7 
 -18  13   1 8.41113 5.74185   1 
 -17  13   1 3.13386 5.06010   1 
  16 -13  -1 3.10044 4.40290   1 
 -16  13   1 4.89427 4.88414   1 
  15 -13  -1 27.1748 6.19374   1 
 -15  13   1 20.8792 5.77895   1 
  14 -13  -1 -2.2288 4.07602   1 
 -14  13   1 1.82220 4.53158   1 
  13 -13  -1 106.707 7.22017   6 
  13 -13  -1 110.074 9.59691   1 
 -13  13   1 104.055 9.33690   1 
  12 -13  -1 18.0925 4.10402   6 
  12 -13  -1 18.4008 4.86422   1 
 -12  13   1 23.9731 5.24486   1 
  11 -13  -1 73.5619 6.67237   6 
  11 -13  -1 84.7435 7.98818   1 
 -11  13   1 78.8535 7.77846   1 
  10 -13  -1 4.54063 3.92097   1 
  10 -13  -1 5.52759 3.19778   6 
 -10  13   1 0.51978 3.42632   1 
   9 -13  -1 103.550 8.03760   6 
   9 -13  -1 80.2119 7.52053   1 
  -9  13   1 69.4244 7.11012   1 
   8 -13  -1 10.8607 3.81195   6 
   8 -13  -1 7.54472 3.89963   1 
  -8  13   1 8.24534 3.45480   5 
  -8  13   1 13.9125 4.08429   1 
   7 -13  -1 35.5953 5.62469   6 
   7 -13  -1 42.3673 5.75586   1 
  -7  13   1 39.7514 5.31960   5 
  -7  13   1 47.0868 5.98322   1 
   6 -13  -1 196.320 10.3354   6 
   6 -13  -1 190.172 10.2819   1 
  -6  13   1 191.994 10.2037   1 
  -6  13   1 185.384 9.84853   5 
   5 -13  -1 3.34629 3.50030   6 
   5 -13  -1 8.48518 3.61325   1 
  -5  13   1 4.91704 3.08783   5 
  -5  13   1 0.49184 2.73882   1 
  -5  13   1 3.15591 2.81077   7 
   4 -13  -1 94.6869 8.33857   6 
   4 -13  -1 100.711 7.36270   1 
  -4  13   1 94.4434 7.85132   5 
  -4  13   1 112.955 6.56171   7 
  -4  13   1 101.816 7.36818   1 
   3 -13  -1 1.30656 3.11442   1 
   3 -13  -1 -4.6326 3.02420   6 
  -3  13   1 0.39494 2.77595   5 
  -3  13   1 0.42281 2.62609   1 
  -3  13   1 5.15347 2.76186   7 
   2 -13  -1 190.758 10.6644   6 
   2 -13  -1 186.767 10.3189   1 
  -2  13   1 174.482 8.79976   7 
  -2  13   1 200.759 10.4020   5 
  -2  13   1 203.678 10.0660   1 
   1 -13  -1 -0.4485 3.30614   1 
   1 -13  -1 3.86997 3.75400   6 
  -1  13   1 4.39936 2.94387   7 
  -1  13   1 8.33366 3.56803   5 
   0 -13  -1 77.3844 7.53257   1 
   0 -13  -1 78.6736 8.03679   6 
   0  13   1 97.1149 7.06168   7 
   0  13   1 93.9733 8.03355   5 
  -1 -13  -1 17.9963 5.31946   6 
  -1 -13  -1 16.6146 4.75932   1 
   1  13   1 13.0115 3.70411   7 
  -2 -13  -1 130.349 9.37161   6 
  -2 -13  -1 138.766 9.52860   1 
   2  13   1 115.879 7.92267   7 
  -3 -13  -1 50.1721 6.79373   1 
  -3 -13  -1 72.1034 7.94831   6 
   3  13   1 50.0358 5.82476   7 
  -4 -13  -1 41.7603 6.51951   1 
  -4 -13  -1 38.1041 6.77078   6 
   4  13   1 38.4487 5.70611   7 
  -5 -13  -1 11.8540 5.30884   6 
  -5 -13  -1 10.8848 4.97139   1 
   5  13   1 20.5909 4.92149   7 
  -6 -13  -1 3.00177 4.42317   1 
   6  13   1 -5.5243 3.70672   7 
 -18  14   1 3.59743 5.94207   1 
 -17  14   1 8.77746 5.88059   1 
  16 -14  -1 6.31630 5.32186   1 
 -16  14   1 2.50049 4.89689   1 
  15 -14  -1 50.5032 7.48843   1 
 -15  14   1 75.4146 8.82289   1 
  14 -14  -1 -1.0079 4.37837   1 
 -14  14   1 -0.1453 4.06806   1 
  13 -14  -1 106.206 7.81212   6 
  13 -14  -1 106.089 9.69466   1 
 -13  14   1 114.214 10.2493   1 
  12 -14  -1 10.6385 4.81993   1 
  12 -14  -1 17.5759 4.67453   6 
 -12  14   1 18.3199 5.01061   1 
  11 -14  -1 21.1473 4.77590   6 
  11 -14  -1 18.9061 5.14569   1 
 -11  14   1 16.5703 4.87126   1 
  10 -14  -1 25.0991 4.84795   6 
  10 -14  -1 25.9830 5.23985   1 
 -10  14   1 33.3504 5.82000   1 
   9 -14  -1 111.278 8.08233   6 
   9 -14  -1 116.530 9.39905   1 
  -9  14   1 119.157 8.50750   1 
   8 -14  -1 95.9165 8.48803   1 
   8 -14  -1 115.401 8.20662   6 
  -8  14   1 121.692 9.40934   1 
  -8  14   1 109.062 8.60469   5 
   7 -14  -1 31.4922 5.53482   6 
   7 -14  -1 33.6201 5.55011   1 
  -7  14   1 28.0567 5.37554   1 
  -7  14   1 31.4412 5.02000   5 
   6 -14  -1 10.8186 4.40706   6 
   6 -14  -1 20.4187 4.85775   1 
  -6  14   1 25.3276 4.73045   5 
  -6  14   1 21.8376 4.45776   1 
   5 -14  -1 4.92124 3.90401   1 
   5 -14  -1 4.60777 3.97504   6 
  -5  14   1 5.80005 3.35271   1 
  -5  14   1 0.71942 3.20751   5 
   4 -14  -1 95.1706 8.36524   1 
   4 -14  -1 82.2210 7.99434   6 
  -4  14   1 78.2604 6.73168   7 
  -4  14   1 83.2730 7.46811   1 
  -4  14   1 90.6037 7.96464   5 
   3 -14  -1 58.5061 6.75708   1 
   3 -14  -1 51.8279 6.88370   6 
  -3  14   1 51.5609 6.21162   5 
  -3  14   1 52.2688 5.36769   7 
   2 -14  -1 277.381 13.1803   1 
   2 -14  -1 248.064 13.1465   6 
  -2  14   1 275.105 11.5177   7 
   1 -14  -1 2.26504 4.20241   6 
   1 -14  -1 6.15208 3.99853   1 
  -1  14   1 5.69163 3.32884   7 
   0 -14  -1 41.0741 6.06297   1 
   0 -14  -1 34.8557 6.26164   6 
   0  14   1 36.5474 5.09791   7 
  -1 -14  -1 5.75648 4.48940   1 
  -1 -14  -1 11.3726 5.03829   6 
   1  14   1 5.34560 3.84910   7 
  -2 -14  -1 47.4735 6.91739   1 
  -2 -14  -1 64.4847 8.18367   6 
   2  14   1 71.4739 6.77948   7 
  -3 -14  -1 21.5527 6.35077   6 
  -3 -14  -1 35.6998 6.19506   1 
   3  14   1 23.3447 4.95888   7 
  -4 -14  -1 3.27368 4.46781   1 
  -4 -14  -1 0.88809 4.96618   6 
   4  14   1 6.50268 4.42573   7 
  -5 -14  -1 2.73335 4.64824   1 
 -17  15   1 23.1246 6.68911   1 
  16 -15  -1 0.15921 4.80104   1 
 -16  15   1 6.25254 5.25934   1 
  15 -15  -1 88.6793 9.54515   1 
 -15  15   1 111.506 10.6881   1 
  14 -15  -1 8.55628 5.63223   1 
 -14  15   1 8.32300 5.37099   1 
  13 -15  -1 175.475 11.8197   1 
  13 -15  -1 171.905 10.1906   6 
 -13  15   1 166.433 11.6191   1 
  12 -15  -1 -1.9594 3.46860   6 
  12 -15  -1 -0.4139 4.54656   1 
 -12  15   1 -1.3067 4.18060   1 
  11 -15  -1 15.1236 4.59631   6 
  11 -15  -1 21.9720 5.45874   1 
 -11  15   1 26.4787 5.72017   1 
  10 -15  -1 65.1829 7.50911   6 
  10 -15  -1 60.9718 7.63221   1 
 -10  15   1 63.1051 7.63786   1 
   9 -15  -1 60.5697 7.28276   1 
   9 -15  -1 61.5796 7.19977   6 
  -9  15   1 62.5311 7.24611   1 
   8 -15  -1 54.9700 7.05509   1 
   8 -15  -1 60.2646 7.26000   6 
  -8  15   1 46.0437 6.45294   1 
   7 -15  -1 34.5599 5.97443   6 
   7 -15  -1 29.0172 5.64961   1 
  -7  15   1 36.4962 5.80562   1 
   6 -15  -1 36.2376 6.14482   6 
   6 -15  -1 45.4887 6.78032   1 
  -6  15   1 36.1708 5.91406   1 
   5 -15  -1 41.9601 6.22794   1 
   5 -15  -1 25.1039 5.55681   6 
  -5  15   1 24.8586 5.12165   1 
   4 -15  -1 207.274 12.2514   6 
   4 -15  -1 229.178 12.2313   1 
   3 -15  -1 16.6046 5.03027   1 
   3 -15  -1 16.4460 5.27951   6 
   2 -15  -1 63.5201 7.90455   6 
   2 -15  -1 63.1074 7.67631   1 
   1 -15  -1 14.0945 5.42467   6 
   1 -15  -1 12.1278 4.74072   1 
   0 -15  -1 55.3421 7.80621   6 
   0 -15  -1 44.2561 6.70059   1 
  -1 -15  -1 12.9124 5.12248   1 
  -1 -15  -1 11.5006 5.33280   6 
  -2 -15  -1 24.8966 6.12424   1 
  -2 -15  -1 33.9866 7.31538   6 
  -3 -15  -1 1.72037 4.69055   1 
  -3 -15  -1 1.75017 5.40528   6 
  16 -16  -1 7.43025 6.02384   1 
 -16  16   1 0.52966 4.95254   1 
  15 -16  -1 55.9529 8.54054   1 
 -15  16   1 46.1614 8.18414   1 
  14 -16  -1 6.83260 5.61875   1 
 -14  16   1 9.79721 5.53221   1 
  13 -16  -1 134.120 9.78683   6 
  13 -16  -1 146.102 11.9684   1 
 -13  16   1 132.352 11.7113   1 
  12 -16  -1 17.1075 4.94099   6 
  12 -16  -1 18.1019 5.82175   1 
 -12  16   1 8.42475 5.04545   1 
  11 -16  -1 41.3969 6.79678   6 
  11 -16  -1 45.3234 7.41980   1 
 -11  16   1 46.5802 7.22048   1 
  10 -16  -1 45.8589 7.15638   6 
  10 -16  -1 34.9283 6.68971   1 
 -10  16   1 44.1814 6.89489   1 
   9 -16  -1 57.4593 7.62212   1 
   9 -16  -1 62.0237 7.85929   6 
  -9  16   1 56.0249 7.65024   1 
   8 -16  -1 28.5705 5.93550   6 
   8 -16  -1 14.4442 5.20538   1 
  -8  16   1 21.9326 5.29841   1 
   7 -16  -1 6.58056 4.52631   6 
   7 -16  -1 3.24222 4.40687   1 
  -7  16   1 0.05872 3.75550   1 
   6 -16  -1 147.743 10.5773   1 
   6 -16  -1 128.388 10.9141   6 
   5 -16  -1 2.61110 4.60634   6 
   5 -16  -1 -0.2045 4.19312   1 
   4 -16  -1 90.5201 8.77915   1 
   4 -16  -1 69.7748 8.86089   6 
   3 -16  -1 8.27229 5.13662   6 
   3 -16  -1 2.12595 4.49582   1 
   2 -16  -1 31.5828 7.14242   6 
   2 -16  -1 45.6540 6.98155   1 
   1 -16  -1 14.5668 6.33463   6 
   1 -16  -1 15.7122 5.48380   1 
   0 -16  -1 18.5281 6.23661   6 
   0 -16  -1 20.3851 5.98948   1 
  -1 -16  -1 9.82900 6.31693   6 
  -1 -16  -1 14.2407 5.50008   1 
  -2 -16  -1 6.09584 5.44474   6 
  -2 -16  -1 -10.265 4.30986   1 
  15 -17  -1 21.2987 6.86638   1 
 -15  17   1 19.1891 6.66997   1 
  14 -17  -1 9.81207 5.78902   1 
 -14  17   1 16.8614 6.31962   1 
  13 -17  -1 6.55396 6.15039   1 
  13 -17  -1 5.20843 4.52103   6 
 -13  17   1 14.1156 5.92638   1 
  12 -17  -1 29.0333 6.07751   6 
  12 -17  -1 37.6143 7.53534   1 
 -12  17   1 43.1617 7.40739   1 
  11 -17  -1 78.0387 8.73852   6 
  11 -17  -1 89.8544 9.96770   1 
 -11  17   1 101.046 9.90683   1 
  10 -17  -1 3.92827 4.67686   6 
  10 -17  -1 7.42980 5.41183   1 
 -10  17   1 4.25327 4.87957   1 
   9 -17  -1 1.24658 4.66606   6 
   9 -17  -1 -0.9005 4.80900   1 
  -9  17   1 2.23731 4.17267   1 
   8 -17  -1 80.3334 9.15568   1 
   8 -17  -1 67.6778 8.47131   6 
   7 -17  -1 1.61257 4.82880   1 
   7 -17  -1 -4.2111 4.28059   6 
   6 -17  -1 98.2287 10.1003   6 
   6 -17  -1 86.1538 9.13728   1 
   5 -17  -1 -0.6501 4.78841   6 
   5 -17  -1 0.26034 4.62992   1 
   4 -17  -1 9.65176 5.25808   1 
   4 -17  -1 12.5159 5.87940   6 
   3 -17  -1 1.72603 5.05973   6 
   3 -17  -1 -5.8873 4.12405   1 
   2 -17  -1 45.2198 7.90497   6 
   2 -17  -1 29.3667 6.76899   1 
   1 -17  -1 4.23713 5.54609   6 
   1 -17  -1 14.0855 5.70903   1 
   0 -17  -1 7.08281 5.40775   1 
   0 -17  -1 -6.9934 5.48957   6 
  14 -18  -1 21.7087 7.18978   1 
 -14  18   1 17.5190 6.24792   1 
  13 -18  -1 4.49317 6.11040   1 
  13 -18  -1 5.10121 5.47083   6 
 -13  18   1 6.93410 5.42360   1 
  12 -18  -1 10.8475 5.99369   1 
  12 -18  -1 14.4169 5.63259   6 
 -12  18   1 17.4829 6.11374   1 
  11 -18  -1 7.94821 5.84349   1 
  11 -18  -1 16.8594 5.98686   6 
 -11  18   1 20.4066 6.19108   1 
  10 -18  -1 18.3243 6.68501   1 
  10 -18  -1 27.4705 6.72241   6 
   9 -18  -1 0.79981 5.32904   1 
   9 -18  -1 -2.0649 4.75708   6 
   8 -18  -1 42.3640 7.92331   1 
   8 -18  -1 44.1518 7.86679   6 
   7 -18  -1 9.53596 5.64497   6 
   7 -18  -1 -2.8696 5.03417   1 
   6 -18  -1 45.0680 7.98338   6 
   6 -18  -1 55.3273 8.48547   1 
   5 -18  -1 6.17809 5.62644   6 
   5 -18  -1 -8.5569 4.65211   1 
   4 -18  -1 26.1243 7.04840   6 
   4 -18  -1 26.6548 6.91613   1 
   3 -18  -1 -0.2554 5.35584   1 
   3 -18  -1 4.89047 6.63534   6 
  11 -19  -1 -3.5799 5.22069   1 
  11 -19  -1 7.45261 6.08261   6 
  10 -19  -1 21.0055 7.19739   6 
  10 -19  -1 36.4691 7.83250   1 
   9 -19  -1 -6.0830 5.62165   6 
   9 -19  -1 12.7449 6.16440   1 
   8 -19  -1 27.9365 7.27741   6 
   8 -19  -1 49.0249 8.64679   1 
   7 -19  -1 2.82595 5.41707   1 
   7 -19  -1 1.13410 5.70087   6 
   6 -19  -1 -1.9309 6.28033   6 
   6 -19  -1 -3.9088 4.88159   1 
   5 -19   2 2.67894 5.59966   6 
   5 -19   2 31.8814 7.24876   1 
   6 -19   2 1.39734 5.22789   1 
   6 -19   2 1.37943 5.58182   6 
   7 -19   2 28.3666 7.43933   1 
   7 -19   2 71.1480 9.41210   6 
   8 -19   2 8.17114 5.89034   1 
   8 -19   2 -2.7715 5.26574   6 
   9 -19   2 30.7974 7.22543   6 
   9 -19   2 23.4064 6.80110   1 
  10 -19   2 -7.8716 5.10981   1 
  10 -19   2 4.19759 5.97759   6 
  11 -19   2 33.1738 7.60133   6 
  11 -19   2 12.4905 6.18558   1 
  12 -19   2 16.1701 6.45589   6 
  12 -19   2 22.0319 7.08547   1 
   2 -18   2 18.9377 5.87244   1 
   2 -18   2 24.7027 7.11260   6 
   3 -18   2 -1.8442 5.10948   6 
   3 -18   2 11.5732 5.56184   1 
   4 -18   2 -0.7208 4.91390   1 
   4 -18   2 -2.4734 5.17068   6 
   5 -18   2 65.7695 9.24009   6 
   5 -18   2 72.0964 8.77067   1 
   6 -18   2 1.00573 5.00979   6 
   6 -18   2 4.86907 5.38855   1 
   7 -18   2 48.3842 7.87449   6 
   7 -18   2 54.3572 7.98981   1 
   8 -18   2 19.9995 6.21109   6 
   8 -18   2 21.0695 6.26475   1 
   9 -18   2 46.5459 7.70234   1 
   9 -18   2 57.3132 8.37465   6 
  10 -18   2 21.4383 6.14985   1 
  10 -18   2 7.46626 5.86921   6 
  11 -18   2 75.8878 9.29047   1 
  11 -18   2 46.3510 7.63481   6 
  12 -18   2 15.4859 6.12919   6 
  12 -18   2 9.47486 5.92717   1 
 -13  18  -2 -0.3814 4.99465   1 
  13 -18   2 4.92393 5.69025   1 
  13 -18   2 1.33396 5.20182   6 
 -14  18  -2 2.61214 5.55561   1 
  14 -18   2 1.95268 6.05786   1 
   0 -17   2 50.4997 7.63909   1 
   0 -17   2 53.7366 9.02851   6 
   1 -17   2 28.6349 6.26438   1 
   1 -17   2 24.9392 7.36617   6 
   2 -17   2 1.80608 4.71188   1 
   2 -17   2 2.76925 5.23399   6 
   3 -17   2 1.76184 4.81305   1 
   3 -17   2 -1.2373 4.83474   6 
   4 -17   2 0.44006 4.67261   1 
   4 -17   2 -2.2742 4.71117   6 
   5 -17   2 141.056 11.1010   1 
   5 -17   2 133.649 11.3822   6 
   6 -17   2 -5.8129 4.28251   1 
   6 -17   2 -1.4839 4.36477   6 
   7 -17   2 67.4137 8.19094   1 
   7 -17   2 68.1426 8.55954   6 
   8 -17   2 8.88873 4.97079   6 
   8 -17   2 24.3581 5.95962   1 
   9 -17   2 84.7354 9.04388   6 
   9 -17   2 73.5531 8.67811   1 
 -10  17  -2 32.5919 6.88341   1 
  10 -17   2 26.8486 6.19709   6 
  10 -17   2 38.6229 7.21783   1 
 -11  17  -2 66.1289 8.42111   1 
  11 -17   2 59.5108 8.46878   1 
  11 -17   2 56.8875 7.54837   6 
 -12  17  -2 13.6736 5.59296   1 
  12 -17   2 9.47282 5.63299   1 
  12 -17   2 4.52490 5.00446   6 
 -13  17  -2 3.83203 4.77839   1 
  13 -17   2 5.28193 4.82510   6 
  13 -17   2 -1.3216 4.88078   1 
 -14  17  -2 5.23786 5.18336   1 
  14 -17   2 24.6781 7.03401   1 
 -15  17  -2 10.8157 5.78924   1 
  15 -17   2 3.81441 5.93170   1 
   2  16  -2 64.4024 7.55886   7 
  -2 -16   2 67.9822 8.06854   1 
  -2 -16   2 68.3334 8.97371   6 
   1  16  -2 28.9831 5.39267   7 
  -1 -16   2 27.4340 6.15754   1 
  -1 -16   2 20.2124 6.53243   6 
   0  16  -2 30.4132 5.43730   7 
   0 -16   2 19.3509 6.07407   6 
   0 -16   2 28.3144 5.94283   1 
  -1  16  -2 46.0555 6.23030   7 
   1 -16   2 35.9060 6.24812   1 
   1 -16   2 49.6721 7.74136   6 
  -2  16  -2 3.62328 3.61652   7 
   2 -16   2 0.51274 4.70407   6 
   2 -16   2 0.78220 4.30442   1 
  -3  16  -2 87.1727 7.67828   7 
   3 -16   2 65.1920 7.68569   1 
   3 -16   2 66.9566 8.52149   6 
   4 -16   2 6.83038 4.57539   1 
   4 -16   2 5.70234 5.22977   6 
   5 -16   2 100.266 9.35142   1 
   5 -16   2 120.021 10.3724   6 
   6 -16   2 2.63998 4.21958   1 
   6 -16   2 -1.3066 4.62109   6 
   7 -16   2 36.5763 6.50408   6 
   7 -16   2 41.5193 6.67124   1 
  -8  16  -2 1.61214 3.74532   1 
   8 -16   2 11.5516 4.75845   6 
   8 -16   2 15.5193 5.48797   1 
  -9  16  -2 57.1511 7.07885   1 
   9 -16   2 70.2762 8.20802   6 
   9 -16   2 52.8707 7.41422   1 
 -10  16  -2 15.1490 5.19322   1 
  10 -16   2 13.5170 5.30354   1 
  10 -16   2 19.1221 5.25081   6 
 -11  16  -2 38.2629 6.51301   1 
  11 -16   2 32.8390 6.43340   1 
  11 -16   2 23.3535 5.80844   6 
 -12  16  -2 2.61654 4.78164   1 
  12 -16   2 -2.0300 4.65748   1 
  12 -16   2 -4.8994 4.01338   6 
 -13  16  -2 9.92725 5.12275   1 
  13 -16   2 -1.6213 5.17524   1 
  13 -16   2 0.70413 4.24442   6 
 -14  16  -2 20.8226 6.45117   1 
  14 -16   2 20.5275 6.59357   1 
 -15  16  -2 2.96303 5.40280   1 
  15 -16   2 -2.7654 4.96302   1 
 -16  16  -2 3.99144 5.39652   1 
  16 -16   2 4.75044 5.37694   1 
   4  15  -2 33.7699 5.64663   7 
  -4 -15   2 43.5905 6.72713   1 
  -4 -15   2 31.4539 6.84371   6 
   3  15  -2 73.6131 7.57449   7 
  -3 -15   2 79.0922 9.47632   6 
  -3 -15   2 80.6147 8.39629   1 
   2  15  -2 82.2510 7.71338   7 
  -2 -15   2 94.0298 9.71863   6 
  -2 -15   2 92.7496 8.83279   1 
   1  15  -2 8.87922 4.01834   7 
  -1 -15   2 14.7169 5.35211   6 
  -1 -15   2 21.0503 5.51342   1 
   0  15  -2 6.48664 3.75591   7 
   0 -15   2 -0.6208 3.98920   1 
   0 -15   2 6.01919 4.78617   6 
  -1  15  -2 88.6102 7.31975   7 
   1 -15   2 84.3602 8.10045   1 
   1 -15   2 76.5615 8.46399   6 
  -2  15  -2 22.4992 4.32896   7 
   2 -15   2 31.7817 5.74352   1 
   2 -15   2 18.2238 5.58331   6 
  -3  15  -2 98.1019 7.36995   7 
   3 -15   2 88.1151 8.12563   1 
   3 -15   2 89.0367 8.91492   6 
  -4  15  -2 1.03900 3.25087   7 
   4 -15   2 0.40478 3.94887   1 
   4 -15   2 3.62303 4.09116   6 
  -5  15  -2 36.1112 4.89309   7 
   5 -15   2 40.5830 6.61510   6 
   5 -15   2 30.2856 5.38433   1 
  -6  15  -2 148.192 9.50150   1 
  -6  15  -2 142.048 11.4063   5 
   6 -15   2 144.254 9.79707   6 
   6 -15   2 134.934 9.54165   1 
  -7  15  -2 176.068 10.2693   1 
   7 -15   2 169.014 10.6135   1 
   7 -15   2 154.738 10.1440   6 
  -8  15  -2 20.8092 4.65096   1 
   8 -15   2 15.3968 5.12106   1 
   8 -15   2 20.1673 4.91123   6 
  -9  15  -2 16.1292 4.89890   1 
   9 -15   2 24.7026 5.51680   6 
   9 -15   2 32.3394 5.90089   1 
 -10  15  -2 29.4663 5.65210   1 
  10 -15   2 23.6246 5.10764   6 
  10 -15   2 20.0553 5.38019   1 
 -11  15  -2 26.2259 5.47961   1 
  11 -15   2 13.9733 4.59540   6 
  11 -15   2 33.0476 5.96231   1 
 -12  15  -2 -2.5881 3.79332   1 
  12 -15   2 -0.1012 4.47006   1 
  12 -15   2 1.84531 3.96787   6 
 -13  15  -2 13.4253 5.46629   1 
  13 -15   2 8.88478 5.28499   1 
  13 -15   2 2.63154 3.87610   6 
 -14  15  -2 6.73898 4.84714   1 
  14 -15   2 -0.3570 4.80108   1 
 -15  15  -2 -0.5713 4.66686   1 
  15 -15   2 -3.1570 4.55565   1 
 -16  15  -2 -2.3244 4.38453   1 
  16 -15   2 -5.4490 4.90235   1 
 -17  15  -2 17.4064 6.63988   1 
  17 -15   2 14.8117 6.24465   1 
   5  14  -2 73.2983 7.36648   7 
  -5 -14   2 72.5388 8.46486   6 
  -5 -14   2 67.2843 7.36359   1 
   4  14  -2 46.8998 6.07210   7 
  -4 -14   2 49.9226 6.86462   1 
  -4 -14   2 47.7866 7.12427   6 
   3  14  -2 28.3388 4.87810   7 
  -3 -14   2 42.5915 7.20778   6 
  -3 -14   2 33.2143 5.85560   1 
   2  14  -2 54.8607 5.99850   7 
  -2 -14   2 60.3097 6.93898   1 
  -2 -14   2 63.3173 7.85142   6 
   1  14  -2 26.9308 4.69871   7 
  -1 -14   2 16.0420 5.30490   6 
  -1 -14   2 19.8059 5.02847   1 
   0  14  -2 2.82553 3.08714   7 
   0 -14   2 -0.1191 4.53125   6 
   0 -14   2 5.57804 3.67914   1 
  -1  14  -2 117.364 7.52279   7 
  -1  14  -2 131.696 8.95843   5 
   1 -14   2 109.531 9.55719   6 
   1 -14   2 124.416 8.71398   1 
  -2  14  -2 15.3083 3.59321   7 
  -2  14  -2 22.8323 4.66019   5 
   2 -14   2 15.4508 4.29989   1 
   2 -14   2 15.6178 4.82415   6 
  -3  14  -2 30.5609 5.02998   5 
  -3  14  -2 29.8795 4.27871   7 
   3 -14   2 35.8919 5.53762   1 
   3 -14   2 34.5357 5.77759   6 
  -4  14  -2 27.3670 4.27600   7 
  -4  14  -2 33.0865 5.03100   5 
   4 -14   2 33.5859 5.39919   1 
   4 -14   2 22.1660 5.08651   6 
  -5  14  -2 15.3652 4.19920   5 
  -5  14  -2 14.0108 3.39814   7 
  -5  14  -2 26.4022 4.60989   1 
   5 -14   2 15.3044 4.56558   6 
   5 -14   2 19.7262 4.62769   1 
  -6  14  -2 137.118 8.61752   5 
  -6  14  -2 130.410 8.63083   1 
  -6  14  -2 127.569 7.40751   7 
   6 -14   2 134.782 8.93994   6 
   6 -14   2 127.165 8.56267   1 
  -7  14  -2 200.209 10.5462   1 
  -7  14  -2 196.815 10.4131   5 
   7 -14   2 182.671 10.4514   6 
   7 -14   2 187.683 10.7048   1 
  -8  14  -2 19.4379 4.67801   1 
   8 -14   2 18.6132 4.76479   1 
   8 -14   2 11.3549 4.28462   6 
  -9  14  -2 13.4620 4.19942   1 
   9 -14   2 14.2273 4.48496   1 
   9 -14   2 18.6368 4.65917   6 
 -10  14  -2 9.14468 4.23938   1 
  10 -14   2 10.1477 4.09477   1 
  10 -14   2 7.51232 3.68594   6 
 -11  14  -2 1.71585 3.77650   1 
  11 -14   2 -3.6154 3.22024   6 
  11 -14   2 -0.1424 3.91401   1 
 -12  14  -2 22.6244 5.64132   1 
  12 -14   2 19.9697 5.31738   1 
  12 -14   2 21.2509 4.34997   6 
 -13  14  -2 28.4043 6.07639   1 
  13 -14   2 14.3972 5.35594   1 
 -14  14  -2 -0.0488 4.33212   1 
  14 -14   2 -0.2473 4.55377   1 
 -15  14  -2 0.94751 4.73569   1 
  15 -14   2 2.47706 4.74502   1 
 -16  14  -2 8.15573 5.27454   1 
  16 -14   2 1.03724 5.23474   1 
 -17  14  -2 -1.2072 5.25057   1 
  17 -14   2 -1.7026 5.61753   1 
   7  13  -2 83.3735 8.05078   7 
  -7 -13   2 98.4772 8.93622   1 
   6  13  -2 17.6472 4.77972   7 
  -6 -13   2 27.4514 5.65657   1 
   5  13  -2 27.5287 4.87775   7 
  -5 -13   2 20.0478 5.04100   1 
  -5 -13   2 26.5048 6.02930   6 
   4  13  -2 44.6302 5.65840   7 
  -4 -13   2 42.6870 6.18102   1 
  -4 -13   2 39.2636 6.24540   6 
   3  13  -2 33.9825 4.84785   7 
  -3 -13   2 40.9117 5.92622   1 
  -3 -13   2 47.1700 6.49983   6 
   2  13  -2 32.3884 4.52496   7 
  -2 -13   2 34.0211 5.54937   1 
  -2 -13   2 29.7007 5.63212   6 
   1  13  -2 108.497 8.69662   5 
   1  13  -2 109.900 7.10424   7 
  -1 -13   2 116.766 8.08088   1 
  -1 -13   2 109.268 9.18820   6 
   0  13  -2 7.05276 3.41313   5 
   0  13  -2 7.71322 3.01424   7 
   0 -13   2 -1.0617 3.51127   6 
   0 -13   2 4.59853 3.46944   1 
  -1  13  -2 3.92645 3.06104   5 
  -1  13  -2 14.8282 3.40764   7 
   1 -13   2 18.0530 4.76162   6 
   1 -13   2 15.1092 3.91102   1 
  -2  13  -2 20.3507 4.10764   5 
  -2  13  -2 18.0439 3.51889   7 
   2 -13   2 17.6278 4.56476   6 
   2 -13   2 21.1956 4.33033   1 
  -3  13  -2 77.8195 6.74176   1 
  -3  13  -2 78.5366 6.82654   5 
  -3  13  -2 91.2340 5.88085   7 
   3 -13   2 69.7607 6.74347   1 
   3 -13   2 68.2047 7.04233   6 
  -4  13  -2 58.1047 6.11905   1 
  -4  13  -2 61.6693 6.08967   5 
  -4  13  -2 67.5499 5.56494   7 
   4 -13   2 61.5125 6.20486   1 
   4 -13   2 53.8046 6.40582   6 
  -5  13  -2 13.7570 3.77142   5 
  -5  13  -2 12.2070 3.65426   1 
  -5  13  -2 13.2935 3.09889   7 
   5 -13   2 8.19958 3.37781   1 
   5 -13   2 18.0514 4.30285   6 
  -6  13  -2 18.7748 3.98142   1 
  -6  13  -2 24.3879 4.32739   5 
  -6  13  -2 18.3491 3.30766   7 
   6 -13   2 21.6540 4.50157   1 
   6 -13   2 28.3589 4.90813   6 
  -7  13  -2 13.0535 3.63547   5 
  -7  13  -2 10.0632 3.53732   1 
  -7  13  -2 14.3761 3.29670   7 
   7 -13   2 8.35921 3.62919   6 
   7 -13   2 8.25418 3.74106   1 
  -8  13  -2 -3.6459 2.61726   1 
   8 -13   2 -2.1598 3.05823   1 
   8 -13   2 -1.5906 2.72798   6 
  -9  13  -2 1.20434 3.21262   1 
   9 -13   2 3.13577 3.63177   1 
   9 -13   2 -2.6288 2.60172   6 
 -10  13  -2 3.42350 3.36107   1 
  10 -13   2 0.76621 3.14793   6 
  10 -13   2 3.97454 3.61008   1 
 -11  13  -2 5.83497 3.73404   1 
  11 -13   2 -4.4075 3.14365   1 
  11 -13   2 4.18679 3.40193   6 
 -12  13  -2 3.97227 3.90505   1 
  12 -13   2 0.98963 2.93273   6 
  12 -13   2 4.42698 4.33294   1 
 -13  13  -2 0.13837 4.08206   1 
  13 -13   2 0.66817 3.93320   1 
 -14  13  -2 11.1135 5.13335   1 
  14 -13   2 8.42779 5.03057   1 
 -15  13  -2 6.93888 5.11774   1 
  15 -13   2 13.6124 5.12213   1 
 -16  13  -2 35.8450 7.02453   1 
  16 -13   2 38.8006 7.09459   1 
 -17  13  -2 -2.9672 4.53672   1 
 -18  13  -2 15.1644 6.72055   1 
   8  12  -2 7.18500 4.43900   7 
  -8 -12   2 7.98768 4.78295   1 
  -8 -12   2 10.7788 4.91982   1 
   7  12  -2 2.76648 4.09624   7 
  -7 -12   2 11.4160 4.51268   1 
   6  12  -2 36.2517 5.42700   7 
  -6 -12   2 28.0807 5.23051   1 
  -6 -12   2 49.1167 6.85052   6 
   5  12  -2 19.5938 4.25669   7 
  -5 -12   2 19.5587 4.67952   1 
  -5 -12   2 13.1377 4.96654   6 
   4  12  -2 33.4474 4.77027   7 
  -4 -12   2 29.9855 5.20313   1 
  -4 -12   2 37.0265 6.01587   6 
   3  12  -2 67.8126 5.92212   7 
   3  12  -2 81.6154 7.30188   5 
  -3 -12   2 79.3792 7.62275   6 
  -3 -12   2 67.6967 6.63268   1 
   2  12  -2 31.8650 4.27657   7 
   2  12  -2 27.9657 4.87349   5 
  -2 -12   2 27.3556 5.57406   6 
  -2 -12   2 30.8740 4.94566   1 
   1  12  -2 146.409 7.64369   7 
   1  12  -2 182.490 9.38275   5 
  -1 -12   2 143.014 8.43775   1 
  -1 -12   2 148.859 9.18430   6 
   0  12  -2 -0.0288 2.63014   5 
   0  12  -2 2.46950 2.50464   7 
   0 -12   2 5.38273 3.16740   1 
   0 -12   2 -1.7352 3.03320   6 
  -1  12  -2 5.01068 2.52474   7 
  -1  12  -2 2.42871 2.75991   5 
   1 -12   2 0.77664 2.71533   1 
   1 -12   2 -0.0225 3.51195   6 
  -2  12  -2 3.54431 2.45564   7 
  -2  12  -2 6.15455 3.22355   5 
  -2  12  -2 5.03531 2.61897   1 
   2 -12   2 6.34652 3.47566   6 
   2 -12   2 2.35716 2.82222   1 
  -3  12  -2 3.52952 2.58881   1 
  -3  12  -2 4.95579 3.03372   5 
  -3  12  -2 5.67505 2.34958   7 
   3 -12   2 1.19308 2.66655   1 
   3 -12   2 6.09946 3.44281   6 
  -4  12  -2 88.6626 6.42631   5 
  -4  12  -2 99.2533 6.59971   1 
  -4  12  -2 88.8240 5.67761   7 
   4 -12   2 92.3347 6.41085   1 
   4 -12   2 93.7373 6.92416   6 
  -5  12  -2 6.12553 3.09215   5 
  -5  12  -2 7.86702 2.61557   7 
  -5  12  -2 10.2274 3.16797   1 
   5 -12   2 7.36278 3.32411   1 
   5 -12   2 15.5503 4.17590   6 
  -6  12  -2 21.4675 3.28984   7 
  -6  12  -2 22.3406 3.94300   1 
  -6  12  -2 29.5946 4.22493   5 
   6 -12   2 11.4357 3.47607   1 
   6 -12   2 25.1114 4.31105   6 
  -7  12  -2 1.36776 2.80180   1 
  -7  12  -2 2.46206 2.25264   7 
  -7  12  -2 3.41657 2.71444   5 
   7 -12   2 1.60928 3.02179   1 
   7 -12   2 3.75286 2.85927   6 
  -8  12  -2 0.77279 2.76888   1 
   8 -12   2 -0.3456 2.58588   6 
   8 -12   2 0.37075 2.87376   1 
  -9  12  -2 8.38423 3.46654   1 
   9 -12   2 8.16755 3.43397   6 
   9 -12   2 8.79524 3.63563   1 
 -10  12  -2 9.85587 3.60939   1 
  10 -12   2 8.79069 3.89462   1 
  10 -12   2 6.29109 3.20888   6 
 -11  12  -2 5.31710 3.46698   1 
  11 -12   2 1.94406 3.47121   1 
  11 -12   2 6.85924 3.21705   6 
 -12  12  -2 36.8819 6.02070   1 
  12 -12   2 45.4825 4.88122   6 
  12 -12   2 46.4638 6.18084   1 
 -13  12  -2 8.76721 4.44362   1 
  13 -12   2 14.1291 4.89144   1 
 -14  12  -2 44.9030 6.77905   1 
  14 -12   2 41.3885 6.56706   1 
 -15  12  -2 11.9919 4.97935   1 
  15 -12   2 8.58980 4.67614   1 
 -16  12  -2 0.18128 4.67169   1 
  16 -12   2 -0.2168 4.54720   1 
 -17  12  -2 0.59533 5.00999   1 
 -18  12  -2 41.0276 7.73266   1 
   9  11  -2 30.0370 5.46265   7 
  -9 -11   2 17.3320 4.98923   1 
   8  11  -2 57.2878 6.29596   7 
  -8 -11   2 62.0021 6.95266   1 
  -8 -11   2 48.6732 6.49690   1 
   7  11  -2 3.64714 3.59369   7 
  -7 -11   2 8.60744 3.92815   1 
   6  11  -2 43.1186 5.15723   7 
  -6 -11   2 43.7308 6.20227   6 
  -6 -11   2 42.7040 5.68176   1 
   5  11  -2 36.7985 4.65209   7 
  -5 -11   2 33.6007 5.12490   1 
  -5 -11   2 37.0600 5.75342   6 
   4  11  -2 3.43484 3.14569   5 
   4  11  -2 -0.8424 2.68182   7 
  -4 -11   2 -1.5976 3.41574   6 
  -4 -11   2 0.20414 2.94151   1 
   3  11  -2 101.825 7.38779   5 
   3  11  -2 112.759 6.60928   7 
  -3 -11   2 119.635 7.72438   1 
  -3 -11   2 114.093 7.79739   6 
   2  11  -2 48.1595 4.89401   2 
   2  11  -2 48.2071 5.44629   5 
   2  11  -2 53.2904 4.71416   7 
  -2 -11   2 47.1474 5.74344   6 
  -2 -11   2 42.0717 4.99627   1 
   1  11  -2 18.7239 3.75067   5 
   1  11  -2 19.8455 3.22571   7 
   1  11  -2 13.4911 2.81695   2 
  -1 -11   2 19.8476 4.02952   1 
  -1 -11   2 19.4768 4.21531   6 
   0  11  -2 65.8853 5.59448   1 
   0  11  -2 70.6777 5.10485   7 
   0  11  -2 61.9733 5.79089   5 
   0  11  -2 63.9545 5.08393   2 
   0 -11   2 67.7728 5.91206   1 
   0 -11   2 64.7253 6.41023   6 
  -1  11  -2 -1.4911 2.12048   5 
  -1  11  -2 -3.9067 1.82706   1 
  -1  11  -2 -1.1025 1.64577   2 
  -1  11  -2 3.71377 2.19917   7 
   1 -11   2 -0.1366 2.36747   1 
   1 -11   2 0.30211 2.75260   6 
  -2  11  -2 63.8667 4.75522   2 
  -2  11  -2 57.1833 4.48465   7 
  -2  11  -2 58.5586 5.44522   5 
  -2  11  -2 60.0492 5.30926   1 
   2 -11   2 68.3435 5.64028   1 
   2 -11   2 62.2989 6.00428   6 
  -3  11  -2 100.320 5.81704   2 
  -3  11  -2 92.2001 6.16821   1 
  -3  11  -2 101.321 5.49118   7 
  -3  11  -2 102.893 6.39068   5 
   3 -11   2 112.234 6.94631   6 
   3 -11   2 95.7360 6.41721   1 
  -4  11  -2 4.82258 2.55418   5 
  -4  11  -2 3.07288 2.52171   1 
  -4  11  -2 2.70318 2.04383   7 
   4 -11   2 4.38633 2.80819   1 
   4 -11   2 3.03259 2.81089   6 
  -5  11  -2 58.6504 4.54029   7 
  -5  11  -2 52.5025 5.05943   5 
  -5  11  -2 50.5420 5.03139   1 
   5 -11   2 47.9308 5.11546   6 
   5 -11   2 46.2771 5.05228   1 
  -6  11  -2 3.26979 2.52174   1 
  -6  11  -2 8.06069 2.83234   5 
  -6  11  -2 4.92461 2.10997   7 
   6 -11   2 9.50331 3.30214   6 
   6 -11   2 0.03635 2.44418   1 
  -7  11  -2 64.7553 4.86045   7 
  -7  11  -2 70.8563 6.08037   1 
   7 -11   2 68.8762 5.90542   6 
   7 -11   2 70.9044 6.22519   1 
  -8  11  -2 74.5125 6.55478   1 
  -8  11  -2 75.9477 5.38552   7 
   8 -11   2 67.7690 5.83384   6 
   8 -11   2 69.9325 6.22208   1 
  -9  11  -2 7.38188 3.40702   1 
   9 -11   2 5.09183 2.93276   6 
   9 -11   2 10.3046 3.59038   1 
 -10  11  -2 100.226 8.25670   1 
  10 -11   2 107.819 8.27531   1 
  10 -11   2 107.592 6.50654   6 
 -11  11  -2 0.53086 2.92512   1 
  11 -11   2 0.91027 3.14692   1 
  11 -11   2 -2.4863 2.11589   6 
 -12  11  -2 80.8552 7.65515   1 
  12 -11   2 77.6934 5.50360   6 
  12 -11   2 72.7325 7.12601   1 
 -13  11  -2 -2.5445 3.14783   1 
  13 -11   2 5.13296 3.90301   1 
 -14  11  -2 40.3051 6.41386   1 
  14 -11   2 33.4897 5.71508   1 
 -15  11  -2 26.5056 6.02807   1 
  15 -11   2 28.1910 5.71104   1 
 -16  11  -2 1.71415 4.67269   1 
  16 -11   2 -1.0582 4.27372   1 
 -17  11  -2 23.5276 6.44519   1 
 -18  11  -2 30.6930 6.91317   1 
  10  10  -2 2.86891 4.14332   7 
  10  10  -2 9.74789 4.81207   7 
 -10 -10   2 14.1083 4.77514   1 
   9  10  -2 26.2684 4.82268   7 
   9  10  -2 18.6455 4.88648   7 
  -9 -10   2 14.9028 4.78334   1 
  -9 -10   2 15.8410 4.76287   1 
   8  10  -2 70.2516 6.73599   7 
   8  10  -2 52.2312 5.91210   7 
  -8 -10   2 59.0595 6.64995   1 
  -8 -10   2 55.4206 6.39211   1 
   7  10  -2 3.14402 3.36966   7 
   7  10  -2 -2.8976 2.73223   7 
  -7 -10   2 2.83033 3.52914   1 
   6  10  -2 19.4675 4.61592   5 
   6  10  -2 17.1892 3.72839   7 
   6  10  -2 17.9076 3.73325   7 
  -6 -10   2 21.1122 4.25113   1 
  -6 -10   2 23.7835 4.73586   6 
   5  10  -2 21.3212 3.59963   7 
   5  10  -2 20.3357 4.44957   5 
   5  10  -2 14.8157 3.45795   7 
  -5 -10   2 13.3603 3.74118   1 
  -5 -10   2 16.0493 4.26228   6 
   4  10  -2 11.0857 2.90942   7 
   4  10  -2 19.4763 3.96895   5 
   4  10  -2 24.2345 3.70559   2 
  -4 -10   2 15.0607 3.58099   1 
  -4 -10   2 5.42751 3.54225   6 
   3  10  -2 11.4131 2.86178   2 
   3  10  -2 22.6551 3.30198   7 
   3  10  -2 22.9007 4.16497   5 
  -3 -10   2 19.8616 3.79637   1 
  -3 -10   2 23.3084 4.20205   6 
   2  10  -2 20.8425 3.09939   7 
   2  10  -2 20.7373 3.14354   2 
   2  10  -2 22.4731 3.17638   2 
   2  10  -2 15.1694 3.51502   5 
  -2 -10   2 20.9978 3.70113   1 
  -2 -10   2 17.3096 3.85375   6 
   1  10  -2 10.4925 2.33402   2 
   1  10  -2 12.8076 2.68109   2 
   1  10  -2 9.80887 2.53486   1 
   1  10  -2 11.2190 2.47621   7 
   1  10  -2 8.14398 2.81771   5 
  -1 -10   2 8.05365 2.77681   1 
  -1 -10   2 5.53211 2.96887   6 
   0  10  -2 51.8854 4.60529   1 
   0  10  -2 40.7805 4.48024   5 
   0  10  -2 37.7237 3.70586   2 
   0  10  -2 39.1859 3.68694   7 
   0  10  -2 39.3794 3.74124   2 
   0 -10   2 36.8372 4.23896   1 
   0 -10   2 30.9409 4.41957   6 
  -1  10  -2 12.6260 2.71069   1 
  -1  10  -2 8.13707 2.19936   2 
  -1  10  -2 10.8767 2.35044   7 
  -1  10  -2 10.8852 2.28354   2 
  -1  10  -2 6.40056 2.46160   5 
   1 -10   2 8.90184 3.08742   6 
   1 -10   2 6.14248 2.61574   1 
  -2  10  -2 21.3435 3.11215   1 
  -2  10  -2 23.8347 2.83606   2 
  -2  10  -2 20.3796 2.96364   2 
  -2  10  -2 25.0541 3.80258   5 
  -2  10  -2 20.1192 2.69251   7 
   2 -10   2 18.0485 3.20747   1 
   2 -10   2 15.9124 3.37964   6 
  -3  10  -2 0.63743 1.53245   2 
  -3  10  -2 3.51127 1.66307   7 
  -3  10  -2 1.08175 2.07013   5 
  -3  10  -2 0.89873 1.47654   2 
  -3  10  -2 2.06792 2.08437   1 
   3 -10   2 1.70326 2.09188   1 
   3 -10   2 -2.7259 2.02598   6 
  -4  10  -2 86.4804 5.56522   1 
  -4  10  -2 92.5495 5.23000   2 
  -4  10  -2 102.269 5.84355   5 
  -4  10  -2 84.0199 4.78033   7 
  -4  10  -2 90.3083 5.14066   2 
   4 -10   2 83.1151 5.71184   1 
   4 -10   2 78.5714 5.62245   6 
  -5  10  -2 4.56851 2.29464   1 
  -5  10  -2 6.64840 2.05428   2 
  -5  10  -2 5.15286 2.32407   5 
  -5  10  -2 7.63116 2.09351   7 
   5 -10   2 2.08438 2.26394   1 
   5 -10   2 9.04686 2.74951   6 
  -6  10  -2 15.1892 2.59288   7 
  -6  10  -2 21.7631 3.42523   5 
  -6  10  -2 19.0407 3.37624   1 
   6 -10   2 20.7852 3.35751   6 
   6 -10   2 11.9377 3.02045   1 
  -7  10  -2 51.8681 5.26774   1 
  -7  10  -2 54.1437 4.23324   7 
   7 -10   2 52.5577 4.81551   6 
   7 -10   2 56.3534 5.27785   1 
  -8  10  -2 17.5217 2.76158   7 
  -8  10  -2 14.3272 3.41263   1 
   8 -10   2 14.1034 2.91899   6 
   8 -10   2 15.0557 3.40278   1 
  -9  10  -2 30.4095 4.55634   1 
   9 -10   2 24.9549 3.61357   6 
   9 -10   2 26.5392 4.06690   1 
 -10  10  -2 208.163 9.89240   1 
  10 -10   2 186.729 8.29703   6 
  10 -10   2 195.970 9.81409   1 
 -11  10  -2 3.67547 3.27552   1 
  11 -10   2 2.33002 3.20675   1 
  11 -10   2 1.08538 2.26686   6 
 -12  10  -2 122.517 8.31733   1 
  12 -10   2 136.414 8.70392   1 
 -13  10  -2 -1.0379 3.50546   1 
  13 -10   2 0.04274 3.55160   1 
 -14  10  -2 84.7263 8.24547   1 
  14 -10   2 93.6917 8.46548   1 
 -15  10  -2 35.3651 6.21810   1 
  15 -10   2 30.5589 5.74868   1 
 -16  10  -2 4.49293 4.92883   1 
 -17  10  -2 56.8007 7.95916   1 
 -18  10  -2 -3.7666 4.96106   1 
  11   9  -2 0.94169 4.24149   7 
 -11  -9   2 -0.3913 3.86077   1 
  10   9  -2 26.4761 5.26873   7 
 -10  -9   2 33.9260 5.56112   1 
   9   9  -2 44.2364 5.63668   7 
  -9  -9   2 40.7696 5.77631   1 
  -9  -9   2 47.1952 6.07716   1 
   8   9  -2 26.7432 4.63043   7 
  -8  -9   2 26.4957 4.92518   1 
  -8  -9   2 21.3956 4.41003   1 
   7   9  -2 26.8713 4.27585   7 
   7   9  -2 39.6417 5.48377   5 
  -7  -9   2 35.1236 4.95009   6 
  -7  -9   2 37.2834 5.13472   1 
   6   9  -2 23.2324 3.72612   2 
   6   9  -2 20.4031 3.53198   7 
   6   9  -2 22.2937 4.28586   5 
  -6  -9   2 26.0573 4.38445   6 
  -6  -9   2 22.1264 4.06811   1 
   5   9  -2 4.55711 2.51885   7 
   5   9  -2 1.16359 2.55882   5 
   5   9  -2 0.47941 1.92398   2 
   5   9  -2 2.78556 2.17984   7 
  -5  -9   2 1.96798 2.65074   1 
  -5  -9   2 1.52063 2.47204   6 
   4   9  -2 2.02560 2.08279   2 
   4   9  -2 -2.0066 1.89096   7 
   4   9  -2 0.97285 1.87738   2 
   4   9  -2 -0.3575 1.92791   7 
   4   9  -2 -0.6379 2.37067   5 
  -4  -9   2 1.63001 2.49948   1 
  -4  -9   2 -0.3287 2.46012   6 
   3   9  -2 29.9344 3.70279   2 
   3   9  -2 29.5990 4.33020   5 
   3   9  -2 27.7178 3.32809   7 
   3   9  -2 27.8376 3.36722   2 
   3   9  -2 26.5019 3.31723   2 
  -3  -9   2 27.7976 4.10920   6 
  -3  -9   2 25.1773 3.79604   1 
   2   9  -2 17.9348 2.83476   1 
   2   9  -2 11.7080 2.32145   2 
   2   9  -2 17.0061 2.71034   7 
   2   9  -2 16.9012 2.59152   2 
   2   9  -2 12.0654 2.98536   5 
   2   9  -2 17.3074 2.73643   2 
  -2  -9   2 14.9187 2.97726   1 
  -2  -9   2 15.9193 3.39694   6 
   1   9  -2 127.527 6.33417   1 
   1   9  -2 122.982 6.71481   5 
   1   9  -2 129.816 6.12528   2 
   1   9  -2 127.707 6.17310   2 
   1   9  -2 120.522 5.72466   7 
  -1  -9   2 133.386 7.17460   6 
  -1  -9   2 121.706 6.54086   1 
   0   9  -2 78.2663 4.97152   1 
   0   9  -2 87.6744 4.88320   2 
   0   9  -2 85.4752 5.42028   5 
   0   9  -2 86.5538 4.85171   2 
   0   9  -2 91.2103 4.67154   7 
   0  -9   2 88.0383 5.73328   6 
   0  -9   2 85.2345 5.39110   1 
  -1   9  -2 9.36538 1.95965   2 
  -1   9  -2 15.5325 2.28824   7 
  -1   9  -2 13.4532 2.72922   5 
  -1   9  -2 10.9114 2.31184   1 
  -1   9  -2 9.02868 2.02349   2 
   1  -9   2 16.9094 3.15832   6 
   1  -9   2 13.3548 2.75944   1 
  -2   9  -2 1.76225 1.51528   7 
  -2   9  -2 -0.3336 1.33325   2 
  -2   9  -2 0.71641 1.30278   2 
  -2   9  -2 3.45135 1.86406   1 
  -2   9  -2 2.33203 1.92710   5 
   2  -9   2 2.05466 2.24157   6 
   2  -9   2 1.60304 1.88009   1 
  -3   9  -2 2.35433 1.93427   5 
  -3   9  -2 2.41952 1.59222   7 
  -3   9  -2 1.74579 1.43626   2 
  -3   9  -2 2.71217 1.84381   1 
  -3   9  -2 6.69628 1.78397   2 
   3  -9   2 0.02913 2.06549   6 
   3  -9   2 1.29042 1.91874   1 
  -4   9  -2 234.076 8.36732   7 
  -4   9  -2 233.389 9.28648   5 
  -4   9  -2 227.010 8.71903   2 
  -4   9  -2 236.963 8.82990   2 
  -4   9  -2 224.830 9.07633   1 
   4  -9   2 225.741 9.25828   1 
   4  -9   2 236.075 9.50121   6 
  -5   9  -2 71.3466 4.76196   1 
  -5   9  -2 70.1734 4.77499   5 
  -5   9  -2 64.9256 4.18554   2 
  -5   9  -2 61.9229 3.87604   7 
  -5   9  -2 71.6965 4.41098   2 
   5  -9   2 69.4843 2.46537   3 
   5  -9   2 67.3248 5.20329   1 
   5  -9   2 69.0247 4.73136   6 
  -6   9  -2 40.3057 3.99813   5 
  -6   9  -2 41.3004 3.39080   7 
  -6   9  -2 42.8502 3.77075   2 
  -6   9  -2 45.8006 4.39387   1 
   6  -9   2 48.4198 4.44927   6 
   6  -9   2 39.8858 1.81557   3 
   6  -9   2 45.2253 4.53561   1 
  -7   9  -2 137.224 6.00338   7 
  -7   9  -2 133.261 7.00244   1 
   7  -9   2 134.823 4.48683   3 
   7  -9   2 134.350 6.56134   6 
   7  -9   2 139.912 7.11078   1 
  -8   9  -2 176.853 8.65197   1 
  -8   9  -2 181.949 7.26953   7 
   8  -9   2 187.040 8.58678   1 
   8  -9   2 185.795 7.91545   6 
  -9   9  -2 -2.9627 2.13533   1 
   9  -9   2 0.27007 1.82757   6 
   9  -9   2 -1.2046 2.31088   1 
 -10   9  -2 135.535 7.98036   1 
  10  -9   2 132.259 6.22712   6 
  10  -9   2 141.507 7.87272   1 
 -11   9  -2 -0.8390 2.69337   1 
  11  -9   2 -1.4748 1.76221   6 
  11  -9   2 3.38866 3.08612   1 
 -12   9  -2 75.9595 7.10822   1 
  12  -9   2 84.0557 7.20867   1 
 -13   9  -2 14.9865 4.32430   1 
  13  -9   2 15.1011 4.09534   1 
 -14   9  -2 133.475 9.23293   1 
  14  -9   2 142.198 9.33037   1 
 -15   9  -2 46.5834 7.03362   1 
  15  -9   2 46.1047 6.44627   1 
 -16   9  -2 2.46373 4.33433   1 
 -17   9  -2 23.7713 6.37911   1 
 -18   9  -2 13.9241 5.66521   1 
  12   8  -2 9.80819 4.94073   7 
 -12  -8   2 20.4960 5.23600   1 
  11   8  -2 12.3113 4.50092   7 
 -11  -8   2 16.9832 4.64854   1 
  10   8  -2 63.7349 6.52167   7 
 -10  -8   2 70.1634 6.91686   1 
   9   8  -2 3.20527 3.33087   7 
  -9  -8   2 2.55552 3.44935   1 
   8   8  -2 23.8047 4.09229   7 
   8   8  -2 18.4086 4.18366   5 
  -8  -8   2 20.7870 4.26981   1 
  -8  -8   2 17.5096 4.05755   1 
   7   8  -2 44.6363 4.59695   2 
   7   8  -2 69.2715 5.51919   7 
   7   8  -2 47.5341 5.72949   5 
  -7  -8   2 60.7519 5.63243   6 
  -7  -8   2 61.7549 5.78379   1 
   6   8  -2 40.7005 4.95397   5 
   6   8  -2 41.7621 4.26114   2 
   6   8  -2 33.9041 3.92630   7 
   6   8  -2 44.1830 4.64786   2 
  -6  -8   2 36.2603 4.41986   1 
  -6  -8   2 39.6674 4.63992   6 
   5   8  -2 14.7353 2.76071   7 
   5   8  -2 11.8165 2.71917   2 
   5   8  -2 10.9116 3.08812   5 
   5   8  -2 16.4763 2.70675   2 
  -5  -8   2 13.1839 3.09040   1 
  -5  -8   2 7.24166 2.86335   6 
   4   8  -2 91.8229 5.99066   5 
   4   8  -2 82.6091 5.11008   2 
   4   8  -2 83.0339 5.07224   2 
   4   8  -2 89.2979 4.95575   7 
  -4  -8   2 90.7061 5.98604   6 
  -4  -8   2 74.8994 5.49838   1 
   3   8  -2 185.332 7.01477   7 
   3   8  -2 169.355 7.24641   2 
   3   8  -2 176.778 6.89316   7 
   3   8  -2 175.633 7.32872   2 
   3   8  -2 160.174 7.93595   5 
   3   8  -2 170.257 7.47012   1 
  -3  -8   2 166.085 7.73611   1 
  -3  -8   2 157.156 7.85802   6 
   2   8  -2 110.959 5.59936   1 
   2   8  -2 100.998 5.36739   2 
   2   8  -2 110.087 6.06455   5 
   2   8  -2 113.535 5.44416   2 
   2   8  -2 108.940 5.39533   2 
   2   8  -2 115.341 5.15356   7 
  -2  -8   2 107.056 6.13816   6 
  -2  -8   2 105.349 5.76371   1 
   1   8  -2 10.1045 2.03607   2 
   1   8  -2 6.51319 1.66461   7 
   1   8  -2 7.66988 2.49878   5 
   1   8  -2 10.7679 2.15049   1 
   1   8  -2 6.68309 1.80180   2 
  -1  -8   2 6.61255 2.14782   1 
  -1  -8   2 5.28911 2.27256   6 
   0   8  -2 1.86945 1.23691   2 
   0   8  -2 0.27377 1.20434   2 
   0   8  -2 1.56434 1.68750   5 
   0   8  -2 -0.6616 1.37283   1 
   0   8  -2 0.89646 1.27403   7 
   0  -8   2 -0.7939 1.67210   1 
   0  -8   2 0.66419 1.82044   6 
  -1   8  -2 192.769 7.39785   2 
  -1   8  -2 203.554 7.12807   7 
  -1   8  -2 201.420 7.82719   1 
  -1   8  -2 200.946 7.49869   2 
  -1   8  -2 194.284 7.99515   5 
   1  -8   2 188.051 7.79120   1 
   1  -8   2 197.667 8.33004   6 
  -2   8  -2 73.5802 3.66961   7 
  -2   8  -2 65.4116 4.22691   5 
  -2   8  -2 63.6939 3.75534   2 
  -2   8  -2 72.3171 4.28495   1 
  -2   8  -2 62.2690 3.77268   2 
   2  -8   2 58.2004 4.13835   1 
   2  -8   2 60.9356 4.39008   6 
  -3   8  -2 11.7167 1.85060   7 
  -3   8  -2 10.7696 2.22595   1 
  -3   8  -2 11.6051 1.99654   2 
  -3   8  -2 10.5373 2.29991   5 
  -3   8  -2 14.3707 2.06044   2 
   3  -8   2 13.1347 2.48638   1 
   3  -8   2 14.0803 1.36575   3 
   3  -8   2 11.0589 2.44490   6 
  -4   8  -2 56.3737 3.60725   2 
  -4   8  -2 61.1776 3.73720   2 
  -4   8  -2 51.8012 4.24963   5 
  -4   8  -2 59.0219 4.13524   1 
  -4   8  -2 55.4511 3.39717   7 
   4  -8   2 56.2323 2.29645   3 
   4  -8   2 56.5729 4.01864   6 
   4  -8   2 63.1327 4.34067   1 
  -5   8  -2 21.7095 2.41225   7 
  -5   8  -2 24.9729 3.11543   5 
  -5   8  -2 20.1643 2.84179   1 
  -5   8  -2 34.0374 3.22813   2 
  -5   8  -2 30.2669 3.02353   2 
   5  -8   2 25.0658 1.49558   3 
   5  -8   2 25.0791 3.04241   6 
   5  -8   2 23.6933 3.10973   1 
  -6   8  -2 338.531 11.4907   2 
  -6   8  -2 348.914 12.0335   1 
  -6   8  -2 305.966 10.6473   7 
   6  -8   2 336.907 9.49693   3 
   6  -8   2 330.387 11.8052   1 
   6  -8   2 330.246 11.4501   6 
  -7   8  -2 3.09567 2.08500   1 
  -7   8  -2 2.50862 1.58538   7 
   7  -8   2 2.52438 1.48765   7 
   7  -8   2 4.35324 2.38282   1 
   7  -8   2 2.02912 1.64978   6 
  -8   8  -2 521.495 17.3055   1 
  -8   8  -2 529.936 15.7815   7 
   8  -8   2 524.970 15.8852   7 
   8  -8   2 506.411 16.0787   6 
   8  -8   2 491.994 17.0469   1 
  -9   8  -2 18.2217 3.48904   1 
   9  -8   2 16.8785 3.39286   1 
   9  -8   2 13.6149 2.36896   6 
   9  -8   2 17.8586 2.67441   7 
 -10   8  -2 231.937 10.5389   1 
  10  -8   2 241.489 10.3667   1 
  10  -8   2 232.968 9.15399   7 
  10  -8   2 242.073 8.56988   6 
 -11   8  -2 103.694 6.99563   1 
  11  -8   2 114.345 7.29990   1 
  11  -8   2 88.4961 5.60040   7 
  11  -8   2 109.659 5.04506   6 
 -12   8  -2 62.6675 6.47126   1 
  12  -8   2 90.8772 7.19395   1 
 -13   8  -2 38.6221 5.74068   1 
  13  -8   2 40.4549 5.42611   1 
 -14   8  -2 36.9656 5.72329   1 
  14  -8   2 47.0300 5.92402   1 
 -15   8  -2 13.2968 4.82364   1 
  15  -8   2 10.5575 4.39807   1 
 -16   8  -2 52.8516 7.25782   1 
 -17   8  -2 30.1659 6.81640   1 
 -18   8  -2 5.65919 5.53078   1 
  13   7  -2 11.2891 4.88497   7 
 -13  -7   2 13.9139 4.98729   1 
  12   7  -2 19.8947 5.04626   7 
 -12  -7   2 16.7273 4.89326   1 
  11   7  -2 6.08324 3.78104   7 
 -11  -7   2 7.24453 3.95104   1 
  10   7  -2 2.92808 3.23889   7 
 -10  -7   2 0.36689 3.38201   1 
   9   7  -2 -2.8467 2.73367   7 
   9   7  -2 0.26724 2.70970   5 
  -9  -7   2 1.52063 3.03589   1 
   8   7  -2 -0.8464 2.93888   5 
   8   7  -2 0.82607 2.20798   2 
   8   7  -2 3.37524 2.53741   7 
  -8  -7   2 4.08948 2.98491   1 
  -8  -7   2 1.88854 2.87196   1 
   7   7  -2 19.8224 3.20714   7 
   7   7  -2 18.6260 3.11695   2 
   7   7  -2 15.7109 3.58759   5 
   7   7  -2 15.6468 3.00570   2 
  -7  -7   2 15.7471 3.39338   1 
  -7  -7   2 19.5905 3.51084   6 
   6   7  -2 39.9264 3.87148   2 
   6   7  -2 38.8194 4.08281   2 
   6   7  -2 44.3184 3.98553   7 
   6   7  -2 51.3045 5.15843   5 
  -6  -7   2 39.2567 4.33370   1 
  -6  -7   2 47.0232 4.59919   6 
   5   7  -2 195.149 7.97070   2 
   5   7  -2 183.449 7.71949   2 
   5   7  -2 191.154 8.74436   5 
   5   7  -2 172.934 7.29822   7 
  -5  -7   2 186.806 8.26869   1 
  -5  -7   2 188.766 8.19456   6 
   4   7  -2 51.1313 4.02085   2 
   4   7  -2 48.4353 3.62916   7 
   4   7  -2 40.2087 3.55421   2 
   4   7  -2 52.4613 4.74030   5 
   4   7  -2 54.4666 4.29844   1 
  -4  -7   2 50.6185 4.38505   1 
  -4  -7   2 48.8008 4.44152   6 
   3   7  -2 76.9803 4.31070   2 
   3   7  -2 81.3432 4.59845   1 
   3   7  -2 71.5854 4.18140   2 
   3   7  -2 80.1551 4.13695   7 
   3   7  -2 83.3173 5.11033   5 
  -3  -7   2 76.8667 4.90572   6 
  -3  -7   2 83.7379 4.91462   1 
   2   7  -2 45.0409 3.02256   7 
   2   7  -2 50.9667 4.24232   5 
   2   7  -2 55.2534 3.43213   2 
   2   7  -2 54.5159 3.18068   7 
   2   7  -2 50.9927 3.39951   2 
   2   7  -2 52.1171 3.61253   1 
  -2  -7   2 51.5844 4.36534   6 
  -2  -7   2 44.9178 3.78040   1 
   1   7  -2 51.9061 3.20407   2 
   1   7  -2 52.0689 4.23360   5 
   1   7  -2 47.3551 2.91606   7 
   1   7  -2 39.0804 3.37751   1 
   1   7  -2 53.1828 3.24274   2 
   1   7  -2 49.2754 3.12156   2 
  -1  -7   2 44.4542 3.69273   1 
  -1  -7   2 41.8955 3.91171   6 
   0   7  -2 128.800 4.88244   7 
   0   7  -2 121.989 5.13275   2 
   0   7  -2 122.745 5.11494   2 
   0   7  -2 120.716 5.41125   1 
   0   7  -2 119.418 5.65861   5 
   0  -7   2 125.036 5.64480   1 
   0  -7   2 120.409 5.90938   6 
   0  -7   2 114.589 6.08397   5 
  -1   7  -2 246.047 8.42042   2 
  -1   7  -2 247.445 8.76017   1 
  -1   7  -2 253.246 8.40234   2 
  -1   7  -2 231.845 8.81550   5 
  -1   7  -2 239.363 8.00988   7 
   1  -7   2 248.270 8.81545   1 
   1  -7   2 261.907 9.40580   6 
  -2   7  -2 40.5667 2.83595   2 
  -2   7  -2 48.2920 3.36920   5 
  -2   7  -2 47.7491 2.98146   2 
  -2   7  -2 45.1348 2.70620   7 
  -2   7  -2 45.4461 3.21169   1 
   2  -7   2 46.1216 3.19741   5 
   2  -7   2 44.7240 3.73089   6 
   2  -7   2 50.1096 3.34072   1 
   2  -7   2 41.3322 2.25073   3 
  -3   7  -2 60.5722 3.37532   2 
  -3   7  -2 50.6127 3.24000   2 
  -3   7  -2 53.2438 3.59206   1 
  -3   7  -2 54.7616 3.57166   5 
  -3   7  -2 48.2959 2.86394   7 
   3  -7   2 58.5173 3.73166   6 
   3  -7   2 45.9913 2.18243   3 
   3  -7   2 49.5038 3.38206   5 
   3  -7   2 55.4721 3.67497   1 
  -4   7  -2 58.0979 3.49099   2 
  -4   7  -2 58.6279 3.20766   7 
  -4   7  -2 55.0582 3.38659   2 
  -4   7  -2 51.2827 3.61333   5 
  -4   7  -2 55.3028 3.65333   1 
   4  -7   2 55.8364 2.25457   3 
   4  -7   2 58.3413 3.62341   5 
   4  -7   2 53.9700 3.62645   6 
   4  -7   2 61.4780 3.85823   1 
  -5   7  -2 12.2001 1.87674   7 
  -5   7  -2 13.8696 2.10699   2 
  -5   7  -2 8.44121 2.03836   1 
   5  -7   2 10.8499 2.25963   1 
   5  -7   2 11.8499 1.22948   3 
   5  -7   2 11.8207 2.09126   6 
  -6   7  -2 370.486 12.4316   1 
  -6   7  -2 357.522 11.3508   7 
   6  -7   2 357.354 12.3580   1 
   6  -7   2 362.728 11.3440   7 
   6  -7   2 367.154 11.8688   6 
  -7   7  -2 -1.0641 1.23024   7 
  -7   7  -2 1.20946 1.77751   1 
   7  -7   2 0.83832 1.85728   1 
   7  -7   2 -0.9912 1.15713   7 
   7  -7   2 -0.4159 1.45359   6 
  -8   7  -2 477.898 14.4817   7 
  -8   7  -2 456.782 15.8341   1 
   8  -7   2 485.525 14.5563   6 
   8  -7   2 480.746 14.6868   7 
   8  -7   2 461.223 15.7708   1 
  -9   7  -2 27.3289 3.78941   1 
   9  -7   2 26.2918 2.92838   7 
   9  -7   2 32.7983 3.92081   1 
   9  -7   2 31.1460 2.78577   6 
 -10   7  -2 210.419 10.0199   1 
  10  -7   2 223.796 9.93660   1 
  10  -7   2 244.381 9.08474   7 
  10  -7   2 241.519 7.90390   6 
 -11   7  -2 75.8949 6.42688   1 
  11  -7   2 80.5597 5.18237   7 
  11  -7   2 87.5323 6.16838   1 
 -12   7  -2 156.453 8.98383   1 
  12  -7   2 147.272 7.44388   7 
  12  -7   2 150.308 8.58422   1 
 -13   7  -2 35.3648 5.37799   1 
  13  -7   2 32.9900 5.05927   1 
  13  -7   2 48.7686 4.84730   7 
 -14   7  -2 11.6514 4.36491   1 
  14  -7   2 9.54608 3.97231   1 
 -15   7  -2 80.5592 8.18481   1 
 -16   7  -2 19.9524 5.62770   1 
 -17   7  -2 68.2520 8.46903   1 
 -18   7  -2 2.23553 5.11755   1 
  13   6  -2 7.47371 4.60612   7 
 -13  -6   2 18.1812 5.00153   1 
  12   6  -2 1.87492 3.65686   7 
 -12  -6   2 1.07889 3.69732   1 
  11   6  -2 42.5157 5.21514   7 
 -11  -6   2 53.2372 6.00461   1 
  10   6  -2 0.04737 2.91588   5 
  10   6  -2 -0.3250 2.89663   7 
 -10  -6   2 0.00831 3.02106   1 
   9   6  -2 3.71364 2.66239   2 
   9   6  -2 1.60306 2.49627   7 
   9   6  -2 -3.3435 2.79267   5 
  -9  -6   2 3.67099 2.91762   1 
   8   6  -2 20.1184 3.51119   2 
   8   6  -2 28.1841 4.42287   5 
   8   6  -2 22.2902 3.33399   2 
   8   6  -2 25.8481 3.42999   7 
  -8  -6   2 25.7561 3.98847   1 
  -8  -6   2 23.7400 3.89879   1 
   7   6  -2 31.2452 3.40941   7 
   7   6  -2 27.0685 3.99554   5 
   7   6  -2 26.1214 3.33224   2 
   7   6  -2 40.2409 4.07844   2 
  -7  -6   2 30.5918 3.61195   6 
  -7  -6   2 28.1495 3.95967   1 
   6   6  -2 42.6678 3.74992   2 
   6   6  -2 52.8444 4.28413   2 
   6   6  -2 45.7739 4.67035   5 
   6   6  -2 39.6534 3.57569   7 
  -6  -6   2 41.8547 4.02702   6 
  -6  -6   2 38.8499 4.01530   1 
   5   6  -2 353.800 12.9107   5 
   5   6  -2 373.415 12.0717   2 
   5   6  -2 345.316 12.0015   1 
   5   6  -2 362.339 11.9304   2 
   5   6  -2 341.579 11.3808   7 
  -5  -6   2 358.204 12.3653   6 
  -5  -6   2 370.168 12.5041   1 
   4   6  -2 12.8620 2.02522   2 
   4   6  -2 14.5564 1.90827   7 
   4   6  -2 12.6583 2.50727   5 
   4   6  -2 16.3580 2.31516   1 
   4   6  -2 15.0456 2.03840   7 
   4   6  -2 17.9939 2.25137   2 
  -4  -6   2 12.1516 2.44718   1 
  -4  -6   2 13.1227 2.58197   6 
   3   6  -2 97.9582 4.77497   1 
   3   6  -2 101.888 4.12815   7 
   3   6  -2 94.7442 5.20545   5 
   3   6  -2 97.0387 4.51076   2 
   3   6  -2 101.663 4.50319   2 
   3   6  -2 97.7615 4.27168   7 
  -3  -6   2 98.4141 4.98810   1 
  -3  -6   2 95.7489 5.08653   6 
   2   6  -2 8.97566 1.35469   7 
   2   6  -2 9.34710 1.48279   7 
   2   6  -2 5.97321 1.38782   2 
   2   6  -2 9.30025 1.77883   1 
   2   6  -2 9.35705 2.05727   5 
   2   6  -2 7.94201 1.43406   2 
  -2  -6   2 6.18971 1.71408   1 
  -2  -6   2 8.25616 2.08673   6 
   1   6  -2 235.926 7.80829   2 
   1   6  -2 242.110 8.21372   1 
   1   6  -2 224.666 8.45926   5 
   1   6  -2 232.197 7.53211   7 
   1   6  -2 239.606 7.55211   7 
   1   6  -2 243.506 7.87714   2 
  -1  -6   2 245.293 8.38282   1 
  -1  -6   2 233.273 8.47458   5 
  -1  -6   2 227.185 8.61376   6 
   0   6  -2 272.942 8.41738   7 
   0   6  -2 272.592 8.72405   2 
   0   6  -2 285.745 9.44088   5 
   0   6  -2 278.704 9.06682   1 
   0   6  -2 279.881 8.72361   2 
   0  -6   2 259.234 9.17431   5 
   0  -6   2 261.554 9.05406   1 
   0  -6   2 263.381 9.55088   6 
  -1   6  -2 72.3775 3.41303   2 
  -1   6  -2 81.0146 3.98436   5 
  -1   6  -2 68.9648 3.41016   2 
  -1   6  -2 64.8286 3.11612   7 
  -1   6  -2 66.2111 3.59518   1 
   1  -6   2 72.2714 3.78960   1 
   1  -6   2 73.8033 3.96897   6 
   1  -6   2 64.3940 3.63342   5 
   1  -6   2 70.6121 3.04598   3 
  -2   6  -2 177.893 6.59723   5 
  -2   6  -2 171.319 6.16300   2 
  -2   6  -2 164.638 5.82404   7 
  -2   6  -2 165.221 6.38818   1 
  -2   6  -2 167.867 6.14188   2 
   2  -6   2 173.025 5.37504   3 
   2  -6   2 171.738 6.46233   5 
   2  -6   2 179.822 6.53142   1 
   2  -6   2 176.501 6.79003   6 
  -3   6  -2 16.8752 1.98205   2 
  -3   6  -2 12.6025 2.05658   5 
  -3   6  -2 17.7686 1.88149   7 
  -3   6  -2 16.5161 2.14569   1 
  -3   6  -2 15.0375 1.81592   2 
   3  -6   2 11.5111 1.92685   5 
   3  -6   2 15.1523 1.25013   3 
   3  -6   2 11.8218 1.92537   1 
   3  -6   2 15.8739 2.19940   6 
  -4   6  -2 109.766 4.98014   5 
  -4   6  -2 111.082 4.73787   2 
  -4   6  -2 104.876 4.34691   7 
  -4   6  -2 112.049 5.04959   1 
  -4   6  -2 113.799 4.75638   2 
   4  -6   2 112.235 5.04497   1 
   4  -6   2 112.908 4.92037   5 
   4  -6   2 109.830 3.65150   3 
   4  -6   2 105.653 4.82867   6 
  -5   6  -2 82.9623 4.40921   2 
  -5   6  -2 72.1637 4.17018   1 
  -5   6  -2 70.7768 3.51147   7 
   5  -6   2 72.3092 3.85504   6 
   5  -6   2 66.4097 4.07443   1 
   5  -6   2 74.9649 4.04816   5 
  -6   6  -2 724.763 21.6324   1 
  -6   6  -2 690.944 20.4622   7 
   6  -6   2 745.208 20.6612   7 
   6  -6   2 739.399 21.5988   1 
   6  -6   2 728.621 21.4684   5 
   6  -6   2 729.275 20.8084   6 
  -7   6  -2 21.5266 2.22843   7 
  -7   6  -2 21.2130 2.95344   1 
   7  -6   2 18.9386 2.85482   1 
   7  -6   2 18.5577 2.18453   7 
   7  -6   2 18.8959 2.13913   6 
  -8   6  -2 787.313 23.3136   1 
   8  -6   2 729.964 21.9300   7 
   8  -6   2 775.268 23.1338   1 
   8  -6   2 757.025 21.4104   6 
  -9   6  -2 -0.1188 2.02466   1 
   9  -6   2 2.57516 1.64864   7 
   9  -6   2 3.67781 1.91864   2 
   9  -6   2 2.91174 1.19188   6 
   9  -6   2 8.99109 2.52557   1 
 -10   6  -2 578.363 18.5440   1 
  10  -6   2 529.841 15.2244   6 
  10  -6   2 539.517 18.2026   1 
  10  -6   2 540.221 17.0030   7 
 -11   6  -2 168.277 6.80708   4 
 -11   6  -2 183.314 8.87127   1 
  11  -6   2 174.095 7.66528   7 
  11  -6   2 169.797 8.55267   1 
 -12   6  -2 118.719 7.84979   1 
  12  -6   2 121.572 7.71016   1 
  12  -6   2 122.132 6.63113   7 
 -13   6  -2 17.3851 4.25988   1 
  13  -6   2 28.8119 4.03835   7 
  13  -6   2 34.0157 5.10313   1 
 -14   6  -2 12.7062 4.38767   1 
  14  -6   2 14.8040 3.77485   7 
  14  -6   2 16.9768 4.50385   1 
 -15   6  -2 172.341 10.7847   1 
 -16   6  -2 0.03333 4.31753   1 
 -17   6  -2 58.0302 7.98778   1 
 -18   6  -2 0.43104 5.36293   1 
  14   5  -2 2.15455 4.01484   7 
 -14  -5   2 -1.9942 3.74592   1 
  13   5  -2 3.68765 4.05232   7 
 -13  -5   2 0.92316 3.76604   1 
  12   5  -2 1.91281 3.38395   7 
 -12  -5   2 1.77776 3.41912   1 
  11   5  -2 10.8775 3.50392   7 
 -11  -5   2 24.6569 4.52412   1 
  10   5  -2 -0.7035 2.31307   2 
  10   5  -2 1.02844 2.52691   7 
  10   5  -2 -2.3557 3.08930   5 
 -10  -5   2 -0.3035 2.77779   1 
   9   5  -2 1.58912 2.27141   7 
   9   5  -2 3.73039 2.34642   2 
   9   5  -2 4.29604 2.78883   5 
   9   5  -2 1.74657 2.17851   2 
  -9  -5   2 1.22910 2.45266   1 
   8   5  -2 4.79601 2.26550   2 
   8   5  -2 5.54215 2.21258   7 
   8   5  -2 6.07186 2.78442   5 
   8   5  -2 4.58334 2.08786   2 
  -8  -5   2 6.76400 2.62711   1 
  -8  -5   2 3.47437 1.92738   6 
  -8  -5   2 7.54200 2.72419   1 
   7   5  -2 55.5035 4.02669   7 
   7   5  -2 65.8414 5.52186   5 
   7   5  -2 59.0070 4.22282   2 
   7   5  -2 61.5536 4.38543   2 
  -7  -5   2 55.5638 4.71645   1 
  -7  -5   2 56.2967 4.08122   6 
  -7  -5   2 62.0506 5.09849   1 
   6   5  -2 0.71532 1.99807   5 
   6   5  -2 1.70931 1.48395   2 
   6   5  -2 2.87987 1.77532   1 
   6   5  -2 0.08403 1.35902   2 
   6   5  -2 1.67230 1.54044   7 
  -6  -5   2 1.51478 1.77897   6 
  -6  -5   2 0.36465 1.79126   1 
   5   5  -2 259.160 8.56431   7 
   5   5  -2 254.002 9.83403   5 
   5   5  -2 261.206 8.46733   7 
   5   5  -2 257.515 8.97712   2 
   5   5  -2 258.218 9.13452   1 
   5   5  -2 253.727 8.85581   2 
  -5  -5   2 253.020 9.22334   6 
  -5  -5   2 263.608 9.41425   1 
   4   5  -2 2.72519 1.17929   2 
   4   5  -2 2.92807 1.08555   7 
   4   5  -2 3.48752 1.80182   5 
   4   5  -2 2.86360 1.35669   1 
   4   5  -2 2.62320 1.24270   7 
   4   5  -2 3.27116 1.17405   2 
  -4  -5   2 3.15963 1.58052   1 
  -4  -5   2 6.24938 1.88886   6 
   3   5  -2 233.876 8.41106   5 
   3   5  -2 234.590 7.52654   2 
   3   5  -2 217.636 7.12711   7 
   3   5  -2 220.786 7.41381   2 
   3   5  -2 218.075 7.05826   7 
   3   5  -2 230.591 7.84453   1 
  -3  -5   2 220.914 8.10456   6 
  -3  -5   2 212.284 7.88724   1 
   2   5  -2 661.788 17.1430   7 
   2   5  -2 609.653 17.1071   7 
   2   5  -2 610.308 17.7766   1 
   2   5  -2 621.148 17.3770   2 
   2   5  -2 603.102 17.3839   2 
   2   5  -2 617.339 18.3222   5 
  -2  -5   2 607.343 18.2633   6 
  -2  -5   2 598.000 17.8644   1 
   1   5  -2 384.190 11.0210   2 
   1   5  -2 374.358 11.7674   5 
   1   5  -2 373.426 11.3440   1 
   1   5  -2 358.629 10.6900   7 
   1   5  -2 389.752 11.0007   2 
  -1  -5   2 364.937 11.6305   5 
  -1  -5   2 376.574 11.8619   6 
  -1  -5   2 353.320 11.3565   1 
   0   5  -2 96.0401 3.82053   2 
   0   5  -2 100.195 4.39154   5 
   0   5  -2 106.936 3.91379   2 
   0   5  -2 102.170 4.19134   1 
   0   5  -2 91.8583 3.56320   7 
   0  -5   2 102.023 4.58585   6 
   0  -5   2 96.7440 4.28491   5 
   0  -5   2 91.5314 3.79178   3 
   0  -5   2 104.215 4.26135   1 
  -1   5  -2 17.3749 1.64330   2 
  -1   5  -2 17.5502 1.48219   7 
  -1   5  -2 17.6884 1.87847   1 
  -1   5  -2 21.9710 1.84253   2 
  -1   5  -2 19.0200 2.00334   5 
   1  -5   2 18.5451 1.94460   1 
   1  -5   2 21.7047 1.46257   3 
   1  -5   2 18.4768 1.97942   5 
   1  -5   2 20.2210 2.19864   6 
  -2   5  -2 1054.19 28.1487   2 
  -2   5  -2 1025.78 28.4027   1 
  -2   5  -2 1042.27 28.1414   2 
  -2   5  -2 1046.82 27.8151   7 
  -2   5  -2 1034.21 28.4774   5 
   2  -5   2 1045.68 28.4532   1 
   2  -5   2 1018.00 27.3832   3 
   2  -5   2 1027.47 28.4071   5 
   2  -5   2 1019.69 28.6325   6 
  -3   5  -2 12.2330 1.74376   5 
  -3   5  -2 9.89908 1.40800   2 
  -3   5  -2 12.7919 1.63598   2 
  -3   5  -2 10.5095 1.34030   7 
  -3   5  -2 11.5872 1.75817   1 
   3  -5   2 11.0312 1.66210   6 
   3  -5   2 12.4961 1.71812   5 
   3  -5   2 7.06487 1.49651   1 
   3  -5   2 14.7641 1.14786   3 
  -4   5  -2 1628.84 43.6396   2 
  -4   5  -2 1673.72 43.2488   7 
  -4   5  -2 1616.11 43.9845   1 
   4  -5   2 1626.82 43.8568   5 
   4  -5   2 1620.75 43.6431   6 
   4  -5   2 1578.73 43.8931   1 
  -5   5  -2 -0.4171 0.98083   7 
  -5   5  -2 0.38932 1.35533   1 
   5  -5   2 0.00441 1.37763   5 
   5  -5   2 -0.7475 1.33900   1 
   5  -5   2 1.18655 1.05027   7 
   5  -5   2 -0.2354 1.12713   6 
  -6   5  -2 1792.38 48.7537   1 
  -6   5  -2 1778.34 47.6757   7 
   6  -5   2 1795.70 48.5860   5 
   6  -5   2 1824.21 47.6650   6 
   6  -5   2 1783.30 48.6554   1 
   6  -5   2 1749.11 47.7745   7 
  -7   5  -2 1.24767 1.68867   1 
   7  -5   2 3.34927 1.11355   6 
   7  -5   2 6.38106 1.60658   7 
   7  -5   2 4.56805 1.58647   2 
   7  -5   2 5.36895 2.02551   1 
  -8   5  -2 776.871 23.8910   1 
   8  -5   2 801.781 22.9532   7 
   8  -5   2 812.015 21.8750   6 
   8  -5   2 810.204 23.3962   2 
   8  -5   2 789.918 23.8718   1 
  -9   5  -2 111.818 4.44789   4 
  -9   5  -2 113.963 6.26042   1 
   9  -5   2 117.888 5.71265   2 
   9  -5   2 120.154 5.88868   2 
   9  -5   2 107.209 5.28981   7 
   9  -5   2 120.321 6.39723   1 
   9  -5   2 109.171 3.85670   6 
 -10   5  -2 465.840 15.9757   1 
 -10   5  -2 450.660 13.3097   4 
  10  -5   2 449.148 14.6004   7 
  10  -5   2 453.465 15.7362   1 
 -11   5  -2 67.1434 5.85602   1 
  11  -5   2 69.2534 5.12400   7 
  11  -5   2 67.3048 5.99882   1 
 -12   5  -2 119.866 7.78229   1 
  12  -5   2 114.388 7.53411   1 
  12  -5   2 116.733 6.57378   7 
 -13   5  -2 -0.0471 3.26229   1 
  13  -5   2 14.1595 3.70832   1 
  13  -5   2 9.88619 3.17917   7 
 -14   5  -2 6.90208 4.08209   1 
  14  -5   2 0.04709 2.95439   7 
 -15   5  -2 131.623 9.68094   1 
 -16   5  -2 2.77232 4.27472   1 
 -17   5  -2 38.4203 6.87693   1 
 -18   5  -2 9.76017 5.92596   1 
  15   4  -2 -0.8117 4.16252   7 
 -15  -4   2 2.58711 4.34315   1 
  14   4  -2 72.5210 7.25408   7 
 -14  -4   2 63.9917 7.23605   1 
  13   4  -2 32.4105 5.07098   7 
 -13  -4   2 22.8853 4.96786   1 
  12   4  -2 79.1998 6.47118   7 
 -12  -4   2 64.4540 6.46408   1 
  11   4  -2 0.06119 2.82833   5 
  11   4  -2 9.24995 3.14982   7 
 -11  -4   2 3.77714 3.00844   1 
  10   4  -2 0.48208 2.13246   2 
  10   4  -2 -3.0235 2.49107   5 
  10   4  -2 0.84937 2.39754   7 
 -10  -4   2 -0.9921 2.56920   1 
   9   4  -2 25.5564 3.31017   2 
   9   4  -2 25.4062 4.11849   5 
   9   4  -2 28.2533 3.45279   2 
   9   4  -2 27.1020 3.35342   7 
  -9  -4   2 26.2490 3.80641   1 
   8   4  -2 -2.4948 1.54486   2 
   8   4  -2 -0.0927 2.28774   5 
   8   4  -2 1.51234 1.88287   7 
   8   4  -2 1.68861 1.72451   2 
  -8  -4   2 -1.1213 1.56050   6 
  -8  -4   2 1.97392 2.16329   1 
   7   4  -2 184.623 7.28609   2 
   7   4  -2 162.934 8.00365   5 
   7   4  -2 187.934 6.81183   7 
   7   4  -2 166.152 6.97973   2 
   7   4  -2 163.883 7.11208   1 
  -7  -4   2 177.503 6.72309   6 
  -7  -4   2 164.468 7.50415   1 
  -7  -4   2 167.777 7.54279   1 
   6   4  -2 88.7184 3.99504   7 
   6   4  -2 91.3811 4.68968   1 
   6   4  -2 94.6298 4.23997   7 
   6   4  -2 88.1745 4.41366   2 
   6   4  -2 83.6853 5.32762   5 
   6   4  -2 82.9118 4.42932   2 
  -6  -4   2 89.1652 4.90792   1 
  -6  -4   2 91.4414 4.49236   6 
   5   4  -2 230.036 7.56655   7 
   5   4  -2 238.480 8.06963   2 
   5   4  -2 237.266 7.66308   7 
   5   4  -2 226.008 7.90936   2 
   5   4  -2 235.446 8.22893   1 
   5   4  -2 240.419 8.98320   5 
  -5  -4   2 239.358 8.23658   6 
  -5  -4   2 238.518 8.48236   1 
   4   4  -2 37.6027 2.45134   2 
   4   4  -2 37.5108 2.29979   7 
   4   4  -2 38.6054 3.34210   5 
   4   4  -2 43.3776 2.26493   7 
   4   4  -2 40.8549 2.49209   2 
   4   4  -2 41.5112 2.75906   1 
  -4  -4   2 39.9188 3.18268   1 
  -4  -4   2 41.6877 2.79944   6 
   3   4  -2 246.977 8.30016   1 
   3   4  -2 259.072 8.89954   5 
   3   4  -2 267.415 8.04033   2 
   3   4  -2 262.681 7.76218   7 
   3   4  -2 264.359 7.71592   7 
   3   4  -2 257.027 7.98371   2 
  -3  -4   2 257.369 8.63275   6 
  -3  -4   2 249.752 8.45330   1 
   2   4  -2 1068.80 27.7039   2 
   2   4  -2 1012.29 28.5326   5 
   2   4  -2 1015.99 28.0569   1 
   2   4  -2 1034.00 27.4505   7 
   2   4  -2 1016.75 27.6327   2 
   2   4  -2 1027.06 27.4284   7 
  -2  -4   2 1014.53 28.5108   6 
  -2  -4   2 1064.72 28.6333   1 
  -2  -4   2 1024.03 28.1387   1 
   1   4  -2 744.286 19.5753   7 
   1   4  -2 745.856 19.5676   7 
   1   4  -2 735.673 20.1509   1 
   1   4  -2 717.617 20.4714   5 
   1   4  -2 752.686 19.7862   2 
   1   4  -2 721.990 19.7392   2 
  -1  -4   2 719.482 20.5865   6 
  -1  -4   2 712.593 20.1650   1 
  -1  -4   2 717.997 20.4256   5 
  -1  -4   2 715.259 20.1643   1 
   0   4  -2 57.4557 2.63237   1 
   0   4  -2 52.1799 2.73130   5 
   0   4  -2 57.2013 2.36012   2 
   0   4  -2 58.4001 2.22778   7 
   0   4  -2 54.9950 2.35148   2 
   0   4  -2 58.3099 2.36105   2 
   0  -4   2 52.6684 2.69808   5 
   0  -4   2 57.1468 2.48328   3 
   0  -4   2 54.4686 2.64830   1 
   0  -4   2 47.0777 2.77178   6 
  -1   4  -2 191.950 5.75642   7 
  -1   4  -2 189.505 6.32235   5 
  -1   4  -2 206.308 6.03264   2 
  -1   4  -2 184.178 6.15048   1 
  -1   4  -2 194.222 5.97533   2 
   1  -4   2 188.675 6.46859   6 
   1  -4   2 191.475 6.21100   1 
   1  -4   2 184.501 5.67980   3 
   1  -4   2 183.845 6.22670   5 
  -2   4  -2 2623.46 68.2337   2 
  -2   4  -2 2592.18 67.9378   7 
  -2   4  -2 2555.26 68.4464   5 
  -2   4  -2 2602.15 68.4513   1 
  -2   4  -2 2660.99 68.2369   2 
   2  -4   2 2608.80 67.6381   3 
   2  -4   2 2664.01 68.6303   6 
   2  -4   2 2622.49 68.4499   1 
   2  -4   2 2502.95 68.3623   5 
  -3   4  -2 30.9666 1.82969   7 
  -3   4  -2 29.9000 1.98409   2 
  -3   4  -2 30.4641 2.19090   1 
  -3   4  -2 32.6734 2.01023   2 
   3  -4   2 30.8930 2.39272   1 
   3  -4   2 29.5662 1.97743   6 
   3  -4   2 30.9469 2.13272   5 
  -4   4  -2 7255.44 190.215   1 
  -4   4  -2 7231.42 189.518   7 
   4  -4   2 7596.60 189.631   7 
   4  -4   2 7373.57 190.198   1 
   4  -4   2 7244.65 189.671   6 
   4  -4   2 7216.16 190.095   5 
  -5   4  -2 26.6841 2.66288   1 
  -5   4  -2 32.1412 2.32308   7 
   5  -4   2 29.4052 2.21915   7 
   5  -4   2 28.9226 1.95477   6 
   5  -4   2 26.6702 2.70941   1 
  -6   4  -2 627.094 18.5664   1 
   6  -4   2 631.445 17.1864   6 
   6  -4   2 626.768 18.5350   1 
   6  -4   2 629.877 17.7961   7 
   6  -4   2 598.333 18.0838   2 
  -7   4  -2 2.12209 1.63520   1 
   7  -4   2 1.03539 1.28129   2 
   7  -4   2 -0.4323 1.42205   1 
   7  -4   2 1.04685 1.18472   7 
   7  -4   2 2.39085 1.34897   2 
   7  -4   2 0.68028 0.71844   6 
  -8   4  -2 777.314 23.1549   1 
  -8   4  -2 773.296 21.0828   4 
   8  -4   2 777.639 22.9962   1 
   8  -4   2 779.462 22.5558   2 
   8  -4   2 774.421 20.3885   6 
   8  -4   2 731.128 21.9582   7 
   8  -4   2 761.482 22.5686   2 
  -9   4  -2 180.967 8.21407   1 
  -9   4  -2 189.979 6.20583   4 
   9  -4   2 204.609 7.96515   2 
   9  -4   2 195.719 8.22534   1 
   9  -4   2 168.022 7.15624   7 
   9  -4   2 197.611 7.83104   2 
 -10   4  -2 2.83326 2.52244   1 
 -10   4  -2 2.29830 1.13349   4 
  10  -4   2 0.08522 1.78978   2 
  10  -4   2 1.61644 2.33805   1 
  10  -4   2 0.82727 1.82542   7 
 -11   4  -2 5.59071 3.08247   1 
  11  -4   2 0.73404 2.34638   1 
  11  -4   2 2.76038 2.10732   7 
 -12   4  -2 13.0139 3.47122   1 
  12  -4   2 10.4387 3.50985   1 
  12  -4   2 7.74159 2.79753   7 
 -13   4  -2 82.7874 7.31755   1 
  13  -4   2 79.1988 6.02567   7 
  13  -4   2 75.7991 6.85301   1 
 -14   4  -2 -1.3439 3.52454   1 
  14  -4   2 3.76250 3.03496   7 
 -15   4  -2 35.0526 5.89462   1 
  15  -4   2 51.0036 5.87731   7 
 -16   4  -2 -7.5316 4.01576   1 
 -17   4  -2 4.84395 5.13320   1 
 -18   4  -2 -0.7569 4.93211   1 
  15   3  -2 1.37633 4.28192   7 
 -15  -3   2 3.58295 4.23351   1 
  14   3  -2 38.2383 5.44136   7 
 -14  -3   2 40.4072 5.92584   1 
  13   3  -2 11.6583 3.80794   7 
 -13  -3   2 1.71752 3.65435   1 
  12   3  -2 10.2798 3.37372   7 
 -12  -3   2 13.3995 3.94482   1 
  11   3  -2 5.58823 2.74253   2 
  11   3  -2 3.06714 2.57671   7 
 -11  -3   2 7.82163 3.16809   1 
  10   3  -2 1.28586 2.11200   2 
  10   3  -2 -0.3325 2.07931   7 
  10   3  -2 1.96410 2.16830   2 
 -10  -3   2 4.66189 2.71400   1 
   9   3  -2 282.744 10.4199   2 
   9   3  -2 284.191 10.6339   2 
   9   3  -2 271.515 9.97410   7 
  -9  -3   2 277.913 10.8807   1 
   8   3  -2 -1.0849 1.39765   2 
   8   3  -2 0.16629 1.61563   2 
   8   3  -2 0.08233 1.69164   1 
   8   3  -2 0.14284 1.55935   7 
  -8  -3   2 1.33851 1.20878   6 
  -8  -3   2 0.31144 1.89099   1 
   7   3  -2 101.814 4.90175   2 
   7   3  -2 102.889 4.66245   7 
   7   3  -2 103.105 5.02203   2 
   7   3  -2 106.721 5.13371   1 
   7   3  -2 98.2412 4.40324   7 
  -7  -3   2 115.451 5.58943   1 
  -7  -3   2 102.083 4.38094   6 
   6   3  -2 356.146 11.0992   1 
   6   3  -2 335.586 10.4413   7 
   6   3  -2 336.793 10.7527   2 
   6   3  -2 314.653 10.7321   2 
   6   3  -2 332.005 10.3420   7 
  -6  -3   2 351.833 10.6487   6 
  -6  -3   2 357.440 11.3826   1 
  -6  -3   2 347.341 11.3578   1 
   5   3  -2 364.262 10.9435   7 
   5   3  -2 374.771 10.9375   7 
   5   3  -2 370.954 11.2490   2 
   5   3  -2 376.548 11.3438   2 
   5   3  -2 389.147 11.6410   1 
  -5  -3   2 364.249 11.7363   1 
  -5  -3   2 377.375 11.3853   6 
   4   3  -2 23.4928 1.85219   2 
   4   3  -2 27.3130 1.67730   7 
   4   3  -2 27.3629 2.29164   1 
   4   3  -2 26.0463 1.79046   7 
   4   3  -2 24.2829 1.87730   2 
  -4  -3   2 26.3692 2.28988   6 
  -4  -3   2 25.0846 2.24646   1 
   3   3  -2 243.830 7.01413   7 
   3   3  -2 232.171 7.54282   1 
   3   3  -2 237.309 8.07575   5 
   3   3  -2 236.788 7.19858   2 
   3   3  -2 238.606 7.01739   7 
   3   3  -2 263.053 7.28634   2 
  -3  -3   2 247.312 7.75199   1 
  -3  -3   2 237.071 7.77155   6 
  -3  -3   2 237.235 7.64686   1 
   2   3  -2 393.833 10.8455   2 
   2   3  -2 405.233 10.7084   7 
   2   3  -2 389.947 10.8315   2 
   2   3  -2 395.401 10.6865   7 
   2   3  -2 391.518 11.2708   1 
   2   3  -2 410.810 11.7685   5 
  -2  -3   2 383.294 11.2827   1 
  -2  -3   2 380.871 11.3035   1 
  -2  -3   2 383.519 11.5782   6 
   1   3  -2 710.032 18.9123   2 
   1   3  -2 707.537 19.3154   1 
   1   3  -2 737.986 18.9429   2 
   1   3  -2 740.505 18.8117   7 
   1   3  -2 708.669 19.6215   5 
   1   3  -2 726.235 18.8021   7 
  -1  -3   2 702.141 19.4990   3 
  -1  -3   2 695.326 19.7269   6 
  -1  -3   2 683.519 19.3143   1 
  -1  -3   2 713.460 19.3546   1 
  -1  -3   2 699.907 19.5900   5 
   0   3  -2 1570.39 40.2055   7 
   0   3  -2 1522.35 40.6311   1 
   0   3  -2 1554.08 40.3235   2 
   0   3  -2 1568.67 40.3442   2 
   0   3  -2 1545.33 40.8194   5 
   0   3  -2 1574.11 40.2155   7 
   0  -3   2 1525.53 41.0336   6 
   0  -3   2 1511.66 40.7833   5 
   0  -3   2 1580.24 40.6680   1 
   0  -3   2 1465.61 40.5195   3 
   0  -3   2 1554.64 40.6506   1 
  -1   3  -2 111.909 3.49743   7 
  -1   3  -2 112.788 3.66281   2 
  -1   3  -2 112.560 3.65569   2 
  -1   3  -2 117.718 3.97066   5 
  -1   3  -2 111.804 3.84931   1 
   1  -3   2 108.360 3.83471   1 
   1  -3   2 112.820 3.86367   1 
   1  -3   2 106.663 3.83963   5 
   1  -3   2 109.686 3.50412   3 
   1  -3   2 113.457 4.06950   6 
  -2   3  -2 9232.79 248.276   2 
  -2   3  -2 9706.21 248.705   1 
  -2   3  -2 9447.95 247.071   2 
  -2   3  -2 9307.98 245.380   7 
  -2   3  -2 9497.94 249.912   5 
   2  -3   2 9538.32 247.984   5 
   2  -3   2 9496.57 248.287   6 
   2  -3   2 9518.34 248.385   1 
  -3   3  -2 0.82516 0.61713   2 
  -3   3  -2 -0.2072 0.82306   1 
  -3   3  -2 -1.2118 0.58101   7 
   3  -3   2 0.61742 0.67846   6 
   3  -3   2 0.72731 0.87234   1 
  -4   3  -2 1447.26 38.3641   1 
   4  -3   2 1394.77 37.7368   7 
   4  -3   2 1426.81 38.3064   1 
   4  -3   2 1416.35 37.5013   6 
  -5   3  -2 136.327 5.55106   1 
   5  -3   2 139.297 4.33833   6 
   5  -3   2 135.570 5.44593   1 
   5  -3   2 131.743 5.10052   2 
   5  -3   2 134.852 4.89693   7 
  -6   3  -2 296.097 9.73104   1 
   6  -3   2 283.755 7.91298   6 
   6  -3   2 264.626 9.46661   1 
   6  -3   2 275.505 9.22488   2 
   6  -3   2 291.325 8.97853   7 
   6  -3   2 282.912 9.28854   2 
  -7   3  -2 152.895 6.80697   1 
  -7   3  -2 165.248 5.22362   4 
   7  -3   2 160.287 4.46430   6 
   7  -3   2 166.799 6.15104   7 
   7  -3   2 168.156 6.50908   2 
   7  -3   2 165.953 6.48005   2 
   7  -3   2 169.655 6.86164   1 
  -8   3  -2 631.747 19.1057   1 
  -8   3  -2 607.432 16.7897   4 
   8  -3   2 610.677 18.7865   1 
   8  -3   2 590.054 18.3420   2 
   8  -3   2 618.423 18.5010   2 
   8  -3   2 604.744 17.9376   7 
  -9   3  -2 20.8697 3.20885   1 
  -9   3  -2 27.1849 1.99662   4 
   9  -3   2 21.4618 2.66121   7 
   9  -3   2 18.9430 3.00789   1 
   9  -3   2 30.1717 3.28999   2 
   9  -3   2 29.1599 3.19290   2 
 -10   3  -2 32.1468 4.17477   1 
  10  -3   2 34.2043 4.08248   1 
  10  -3   2 31.8559 3.45160   7 
  10  -3   2 26.0535 3.28460   2 
 -11   3  -2 76.1894 6.27116   1 
  11  -3   2 88.4124 5.87630   1 
  11  -3   2 77.6356 5.15275   7 
 -12   3  -2 47.6210 5.67671   1 
  12  -3   2 34.8352 4.66376   1 
  12  -3   2 35.1232 4.14822   7 
 -13   3  -2 118.409 8.23269   1 
  13  -3   2 109.248 6.97860   7 
 -14   3  -2 5.13544 3.96195   1 
  14  -3   2 2.70076 3.06726   7 
 -15   3  -2 15.8692 5.00563   1 
  15  -3   2 26.0803 4.68200   7 
 -16   3  -2 15.7675 5.47003   1 
 -17   3  -2 18.9600 6.07023   1 
  16   2  -2 5.34518 4.62618   7 
 -16  -2   2 -1.4605 4.39301   1 
  15   2  -2 7.89705 4.36582   7 
 -15  -2   2 -0.3520 4.08633   1 
  14   2  -2 -0.6057 3.45180   7 
 -14  -2   2 -0.7747 3.54038   1 
  13   2  -2 21.5386 4.12395   7 
 -13  -2   2 14.6637 4.13932   1 
  12   2  -2 -0.8321 2.59477   7 
 -12  -2   2 2.02753 3.11939   1 
  11   2  -2 103.574 6.13910   7 
  11   2  -2 109.692 6.64704   2 
 -11  -2   2 107.722 6.97811   1 
  10   2  -2 61.8091 4.66778   7 
  10   2  -2 62.0486 4.84561   2 
  10   2  -2 56.8566 4.92522   2 
 -10  -2   2 65.9809 5.30417   1 
   9   2  -2 268.637 9.93951   2 
   9   2  -2 253.165 9.22482   7 
   9   2  -2 259.909 9.68884   2 
  -9  -2   2 258.659 10.1561   1 
   8   2  -2 14.7247 2.30120   2 
   8   2  -2 12.6035 2.05789   7 
   8   2  -2 17.6808 2.37477   2 
   8   2  -2 16.0986 2.46420   1 
  -8  -2   2 18.4389 1.69243   6 
  -8  -2   2 15.5837 2.37889   4 
  -8  -2   2 17.8552 2.80627   1 
   7   2  -2 540.824 15.7597   7 
   7   2  -2 538.455 16.2588   2 
   7   2  -2 570.431 16.5415   1 
   7   2  -2 547.227 15.8314   7 
   7   2  -2 535.081 16.1977   2 
  -7  -2   2 535.277 15.3559   6 
  -7  -2   2 551.280 16.3660   4 
  -7  -2   2 538.305 16.6836   1 
   6   2  -2 452.812 12.9032   7 
   6   2  -2 429.288 12.8931   7 
   6   2  -2 450.411 13.5549   1 
   6   2  -2 426.301 13.2697   2 
   6   2  -2 442.241 13.2571   2 
  -6  -2   2 450.546 12.8555   6 
  -6  -2   2 468.264 13.8551   1 
  -6  -2   2 450.784 13.5627   4 
   5   2  -2 697.249 18.6307   7 
   5   2  -2 655.984 18.8252   2 
   5   2  -2 689.624 18.9505   2 
   5   2  -2 656.998 19.1680   1 
   5   2  -2 690.436 18.5858   7 
  -5  -2   2 670.409 19.3738   1 
  -5  -2   2 673.158 19.3257   4 
  -5  -2   2 694.364 18.8364   6 
   4   2  -2 1323.13 35.2700   7 
   4   2  -2 1280.53 35.8304   1 
   4   2  -2 1333.25 35.4806   2 
   4   2  -2 1319.79 35.5078   2 
   4   2  -2 1331.69 35.2632   7 
  -4  -2   2 1374.61 35.9981   1 
  -4  -2   2 1363.55 35.7565   6 
  -4  -2   2 1407.31 36.0650   1 
  -4  -2   2 1322.08 36.0981   4 
   3   2  -2 1174.29 30.1031   7 
   3   2  -2 1128.35 30.2173   2 
   3   2  -2 1156.58 30.2367   2 
   3   2  -2 1109.94 30.6461   1 
   3   2  -2 1182.59 30.0991   7 
  -3  -2   2 1195.11 30.7796   1 
  -3  -2   2 1134.62 30.6984   1 
  -3  -2   2 1122.33 30.9632   4 
  -3  -2   2 1135.73 30.7338   6 
   2   2  -2 1227.12 31.1388   2 
   2   2  -2 1185.88 32.0154   5 
   2   2  -2 1181.41 31.0623   7 
   2   2  -2 1165.96 31.1172   2 
   2   2  -2 1223.63 31.6593   1 
   2   2  -2 1203.90 31.0727   7 
  -2  -2   2 1234.56 32.0701   4 
  -2  -2   2 1202.99 31.6857   1 
  -2  -2   2 1175.97 31.6896   1 
  -2  -2   2 1180.54 31.9081   6 
   1   2  -2 208.944 6.11574   1 
   1   2  -2 220.442 6.41076   5 
  -1  -2   2 201.959 6.32156   5 
  -1  -2   2 220.888 6.52116   4 
  -1  -2   2 217.862 6.44662   3 
  -1  -2   2 215.551 6.14780   1 
  -1  -2   2 213.103 6.14917   1 
   0   2  -2 1088.51 28.5744   2 
   0   2  -2 1087.35 28.5698   2 
   0   2  -2 1108.13 28.8855   1 
   0   2  -2 1115.53 28.9949   5 
   0   2  -2 1116.38 28.5245   7 
   0  -2   2 1138.03 28.8956   1 
   0  -2   2 1047.40 28.8605   1 
   0  -2   2 1115.92 28.9853   5 
   0  -2   2 1086.41 28.9350   3 
  -1   2  -2 20.1065 0.96449   7 
  -1   2  -2 17.8450 1.05151   2 
  -1   2  -2 18.5231 1.17979   1 
  -1   2  -2 19.8187 1.05237   2 
   1  -2   2 18.1849 1.19450   6 
   1  -2   2 19.7495 1.03407   3 
   1  -2   2 19.0027 1.19862   1 
   1  -2   2 18.1217 1.12309   5 
   1  -2   2 18.8962 1.19723   1 
  -2   2  -2 5.11172 0.87921   1 
  -2   2  -2 7.89873 0.95099   7 
  -2   2  -2 5.96024 0.80104   2 
  -2   2  -2 7.71462 1.00703   2 
   2  -2   2 4.84403 0.89270   1 
   2  -2   2 4.01448 0.71537   6 
  -3   2  -2 8.24485 1.27707   1 
   3  -2   2 8.08002 0.99093   7 
   3  -2   2 9.21789 1.27800   1 
   3  -2   2 8.80043 0.84837   6 
  -4   2  -2 574.967 16.8305   1 
   4  -2   2 587.370 16.3041   7 
   4  -2   2 601.561 16.8447   1 
   4  -2   2 592.237 16.5911   2 
   4  -2   2 595.445 16.5717   2 
   4  -2   2 587.530 15.7040   6 
  -5   2  -2 298.690 8.16178   4 
  -5   2  -2 279.475 9.28961   1 
   5  -2   2 270.220 8.92825   2 
   5  -2   2 281.479 9.28397   1 
   5  -2   2 287.840 9.01098   2 
   5  -2   2 281.755 7.66288   6 
   5  -2   2 284.272 8.69762   7 
  -6   2  -2 770.482 21.4248   1 
  -6   2  -2 735.711 19.5845   4 
   6  -2   2 684.732 21.0597   1 
   6  -2   2 735.051 20.4980   7 
   6  -2   2 753.225 20.9723   2 
   6  -2   2 711.073 20.8052   2 
  -7   2  -2 33.5374 3.21347   1 
  -7   2  -2 29.8742 1.75689   4 
   7  -2   2 34.4044 2.93510   2 
   7  -2   2 38.8820 3.15005   2 
   7  -2   2 38.2102 2.91228   7 
   7  -2   2 30.6606 3.09110   1 
  -8   2  -2 190.094 5.93119   4 
  -8   2  -2 196.924 8.13063   1 
   8  -2   2 190.663 7.46332   2 
   8  -2   2 198.457 7.89134   1 
   8  -2   2 177.969 7.01279   7 
   8  -2   2 188.877 7.50434   2 
  -9   2  -2 32.9166 2.02717   4 
  -9   2  -2 27.5736 3.68076   1 
   9  -2   2 30.4563 3.24280   2 
   9  -2   2 32.3364 3.24845   2 
   9  -2   2 34.3564 3.92223   1 
   9  -2   2 21.6779 2.71503   7 
 -10   2  -2 4.19508 2.63715   1 
  10  -2   2 5.89539 2.22354   7 
  10  -2   2 4.94883 2.52735   1 
  10  -2   2 5.86200 2.14019   2 
 -11   2  -2 154.768 8.35853   1 
  11  -2   2 152.634 7.21200   7 
  11  -2   2 143.814 7.65705   1 
 -12   2  -2 12.8023 3.66892   1 
  12  -2   2 8.06116 3.08067   7 
  12  -2   2 17.3229 3.89671   1 
 -13   2  -2 42.9603 6.03114   1 
  13  -2   2 33.8090 4.50175   7 
 -14   2  -2 3.35262 3.85196   1 
  14  -2   2 4.54721 3.36069   7 
 -15   2  -2 32.4650 6.08601   1 
  15  -2   2 25.3048 4.93958   7 
 -16   2  -2 17.8131 5.63498   1 
 -17   2  -2 14.0723 5.67779   1 
  16   1  -2 6.19659 4.31998   7 
 -16  -1   2 9.50176 4.79122   1 
  15   1  -2 -0.2164 3.67455   7 
 -15  -1   2 -3.8848 3.77045   1 
  14   1  -2 44.7243 5.31780   7 
 -14  -1   2 39.1477 5.67563   1 
  13   1  -2 118.849 7.25710   7 
 -13  -1   2 97.8509 7.76595   1 
  12   1  -2 18.9724 3.50309   7 
  12   1  -2 14.5916 3.22987   2 
 -12  -1   2 15.8201 3.95461   1 
  11   1  -2 277.620 10.6406   2 
  11   1  -2 256.262 10.6553   2 
  11   1  -2 253.873 10.0049   7 
 -11  -1   2 270.659 11.1468   1 
  10   1  -2 8.98539 2.41105   2 
  10   1  -2 10.4791 2.42378   2 
  10   1  -2 3.98350 2.06623   7 
 -10  -1   2 2.89693 1.84140   4 
 -10  -1   2 6.59061 2.58973   1 
   9   1  -2 442.593 13.9889   7 
   9   1  -2 455.792 14.5013   2 
   9   1  -2 437.749 14.5764   1 
   9   1  -2 459.891 14.6628   2 
  -9  -1   2 445.152 14.9385   1 
  -9  -1   2 458.245 14.0801   4 
   8   1  -2 68.0944 3.59196   7 
   8   1  -2 77.4961 4.33644   1 
   8   1  -2 74.7478 4.08618   2 
   8   1  -2 67.1295 3.78133   7 
   8   1  -2 67.8802 4.08363   2 
  -8  -1   2 73.6477 2.65243   6 
  -8  -1   2 78.5670 3.99176   4 
  -8  -1   2 64.2261 4.38602   1 
   7   1  -2 775.224 21.9773   1 
   7   1  -2 769.088 21.6845   2 
   7   1  -2 736.637 21.6724   2 
   7   1  -2 759.646 21.2250   7 
   7   1  -2 782.082 21.3383   7 
  -7  -1   2 759.681 22.1730   1 
  -7  -1   2 746.801 21.6308   4 
  -7  -1   2 771.605 20.5360   6 
   6   1  -2 568.523 16.2504   1 
   6   1  -2 513.213 15.8272   2 
   6   1  -2 550.420 15.6059   7 
   6   1  -2 538.460 15.8493   2 
   6   1  -2 582.672 15.6261   7 
  -6  -1   2 544.602 16.3597   1 
  -6  -1   2 570.065 15.2299   6 
  -6  -1   2 571.440 16.1228   4 
   5   1  -2 1989.17 54.1167   1 
   5   1  -2 2105.37 53.5985   7 
   5   1  -2 2117.60 53.8854   2 
   5   1  -2 2021.34 53.5271   7 
   5   1  -2 2050.07 53.8033   2 
  -5  -1   2 1937.44 54.1955   1 
  -5  -1   2 2032.78 54.1642   4 
  -5  -1   2 2090.04 53.4979   6 
   4   1  -2 136.300 4.33078   2 
   4   1  -2 133.602 4.64140   1 
   4   1  -2 131.622 4.14152   7 
   4   1  -2 136.661 4.30867   2 
   4   1  -2 132.887 4.13483   7 
  -4  -1   2 136.313 4.68391   1 
  -4  -1   2 134.857 4.32456   6 
  -4  -1   2 138.182 4.78698   4 
   3   1  -2 742.153 18.7658   7 
   3   1  -2 709.014 18.7548   7 
   3   1  -2 728.391 18.8553   2 
   3   1  -2 706.131 18.8461   2 
   3   1  -2 712.136 19.2862   1 
  -3  -1   2 688.298 19.3203   1 
  -3  -1   2 741.031 19.3754   1 
  -3  -1   2 708.031 19.3146   1 
  -3  -1   2 727.821 19.2323   6 
  -3  -1   2 692.740 19.4898   4 
   2   1  -2 22.6976 1.14858   1 
  -2  -1   2 21.3619 1.10756   1 
  -2  -1   2 24.9547 1.42911   4 
  -2  -1   2 21.7931 1.15394   1 
  -2  -1   2 22.5650 1.25182   6 
  -2  -1   2 23.8735 1.54125   3 
   1   1  -2 9.03378 0.48605   1 
   1   1  -2 8.33206 0.69389   5 
   1   1  -2 7.44847 0.47697   1 
  -1  -1   2 7.84753 0.49596   1 
  -1  -1   2 8.81930 0.88187   3 
  -1  -1   2 11.2872 0.93761   4 
  -1  -1   2 7.29569 0.75267   6 
   0   1  -2 1126.79 29.3915   1 
   0   1  -2 1101.61 29.3986   1 
   0   1  -2 1137.04 29.4094   5 
   0  -1   2 1140.88 29.6898   6 
   0  -1   2 1156.63 29.5994   3 
  -1   1  -2 0.81063 0.40269   1 
  -1   1  -2 0.81034 0.31499   2 
  -1   1  -2 0.79457 0.42107   1 
  -1   1  -2 1.03859 0.30978   2 
   1  -1   2 1.22789 0.40448   1 
   1  -1   2 0.70569 0.43213   1 
   1  -1   2 3.26550 0.46865   6 
  -2   1  -2 106.651 3.62577   1 
   2  -1   2 101.916 3.59452   1 
   2  -1   2 103.995 3.09797   6 
  -3   1  -2 1756.16 47.7743   1 
   3  -1   2 1819.86 47.5961   2 
   3  -1   2 1794.61 47.7621   1 
   3  -1   2 1813.13 46.8219   6 
   3  -1   2 1853.45 47.3862   7 
   3  -1   2 1801.85 47.5623   2 
  -4   1  -2 110.844 4.47797   1 
   4  -1   2 110.171 4.39444   1 
   4  -1   2 113.723 4.00109   7 
   4  -1   2 112.678 4.21730   2 
  -5   1  -2 17.3314 2.12018   1 
   5  -1   2 21.9372 1.95122   7 
   5  -1   2 15.9332 1.95364   1 
   5  -1   2 20.5563 1.92936   2 
  -6   1  -2 324.706 9.36154   4 
  -6   1  -2 348.963 11.1163   1 
   6  -1   2 330.312 10.6165   2 
   6  -1   2 335.035 10.2365   7 
   6  -1   2 322.162 10.8267   1 
   6  -1   2 338.236 10.6213   2 
  -7   1  -2 71.0917 4.44336   1 
  -7   1  -2 67.6618 2.78516   4 
   7  -1   2 66.2378 4.25501   1 
   7  -1   2 71.9614 3.89055   2 
   7  -1   2 72.6735 3.71280   7 
  -8   1  -2 1.38869 1.85451   1 
  -8   1  -2 2.82678 1.02418   4 
   8  -1   2 3.69662 1.61578   2 
   8  -1   2 2.55303 1.52421   2 
   8  -1   2 4.95234 1.72177   7 
   8  -1   2 1.00429 1.88924   1 
  -9   1  -2 136.424 4.83664   4 
  -9   1  -2 140.920 6.98547   1 
   9  -1   2 151.982 6.73179   2 
   9  -1   2 130.436 6.01692   7 
   9  -1   2 136.702 6.84114   1 
   9  -1   2 121.744 6.20349   2 
 -10   1  -2 1.65215 2.34472   1 
  10  -1   2 3.37691 2.05609   7 
  10  -1   2 2.31833 1.95424   2 
  10  -1   2 3.17916 2.30818   1 
 -11   1  -2 44.0097 5.04403   1 
  11  -1   2 28.4965 4.29453   1 
  11  -1   2 39.7434 4.05331   7 
 -12   1  -2 13.9394 4.06421   1 
  12  -1   2 13.2074 3.25207   7 
 -13   1  -2 0.37316 3.47829   1 
  13  -1   2 -0.9134 2.99461   7 
 -14   1  -2 17.9083 4.87148   1 
  14  -1   2 16.0723 4.12034   7 
 -15   1  -2 0.44815 3.90126   1 
  15  -1   2 -1.0985 3.71521   7 
 -16   1  -2 9.93564 5.10629   1 
 -17   1  -2 5.31649 5.24256   1 
  17   0  -2 8.88920 4.87211   7 
 -17   0   2 20.5483 5.50645   1 
  16   0  -2 26.4283 5.25698   7 
 -16   0   2 26.9561 5.71451   1 
  15   0  -2 14.4139 4.28659   7 
 -15   0   2 19.9180 4.94127   1 
  14   0  -2 -0.4771 3.05580   7 
 -14   0   2 -0.1031 3.18700   1 
  13   0  -2 111.785 6.91538   7 
 -13   0   2 93.2609 7.42197   1 
  12   0  -2 8.13461 2.78044   2 
  12   0  -2 6.31121 2.63463   7 
 -12   0   2 2.67473 2.92229   1 
  11   0  -2 387.562 12.8992   7 
  11   0  -2 378.805 13.5210   2 
  11   0  -2 350.870 13.1299   2 
 -11   0   2 370.269 12.2525   4 
 -11   0   2 394.836 13.9065   1 
  10   0  -2 4.87605 2.04141   2 
  10   0  -2 0.74947 1.79732   7 
  10   0  -2 3.93180 2.17382   1 
  10   0  -2 6.43154 2.10407   2 
 -10   0   2 1.43528 2.29028   1 
 -10   0   2 3.01427 1.80355   4 
   9   0  -2 300.978 10.6726   1 
   9   0  -2 308.707 10.5889   2 
   9   0  -2 302.793 10.0844   7 
   9   0  -2 302.586 10.4772   2 
  -9   0   2 286.839 10.8352   1 
  -9   0   2 306.683 10.0176   4 
   8   0  -2 75.1661 4.11106   2 
   8   0  -2 80.5973 4.37906   1 
   8   0  -2 74.5863 3.80879   7 
   8   0  -2 77.2856 4.09752   2 
  -8   0   2 80.9180 4.61300   1 
  -8   0   2 76.2634 3.81922   4 
   7   0  -2 635.705 18.3874   1 
   7   0  -2 628.620 18.1072   2 
   7   0  -2 635.330 18.1833   2 
   7   0  -2 632.376 17.7740   7 
  -7   0   2 624.554 18.5521   1 
  -7   0   2 612.378 17.9211   4 
   6   0  -2 9.87621 1.26619   7 
   6   0  -2 7.97256 1.19253   7 
   6   0  -2 9.15937 1.59013   1 
   6   0  -2 7.59872 1.26932   2 
   6   0  -2 7.57256 1.23609   2 
  -6   0   2 5.84354 1.30044   4 
  -6   0   2 8.07256 0.75886   6 
  -6   0   2 9.61248 1.74129   1 
   5   0  -2 6.91486 1.30454   1 
   5   0  -2 5.38609 1.00183   2 
   5   0  -2 4.85167 0.99357   2 
   5   0  -2 9.28711 1.07308   7 
   5   0  -2 4.11696 0.85816   7 
  -5   0   2 4.60666 1.16994   4 
  -5   0   2 6.11195 0.71444   6 
  -5   0   2 6.52425 1.35587   1 
   4   0  -2 57.0856 2.22527   2 
   4   0  -2 57.4538 2.06500   7 
   4   0  -2 58.2634 2.22854   2 
   4   0  -2 53.6823 2.47247   1 
   4   0  -2 58.8747 2.10592   7 
  -4   0   2 53.6239 2.46715   4 
  -4   0   2 55.0273 1.96181   6 
  -4   0   2 56.5974 2.52315   1 
  -4   0   2 51.8226 2.50472   1 
   3   0  -2 3.83979 0.48149   2 
   3   0  -2 3.17959 0.44065   7 
   3   0  -2 2.64121 0.64618   1 
   3   0  -2 2.92004 0.42231   7 
   3   0  -2 3.85526 0.45518   2 
  -3   0   2 2.22146 0.59632   1 
  -3   0   2 4.00095 0.74929   1 
  -3   0   2 2.08752 0.70124   4 
  -3   0   2 2.96536 0.53069   6 
   2   0  -2 45.1940 1.64528   1 
  -2   0   2 48.4838 1.65916   6 
  -2   0   2 49.3104 1.70027   1 
  -2   0   2 43.2776 1.62357   1 
  -2   0   2 47.5831 1.95537   3 
  -2   0   2 45.7161 1.89897   4 
   1   0  -2 237.702 6.27298   1 
   1   0  -2 230.095 6.27010   1 
  -1   0   2 243.396 6.52525   6 
   0   0  -2 1699.62 43.7066   2 
   0   0  -2 1689.90 44.1125   1 
   0   0  -2 1599.25 43.5390   2 
   0   0  -2 1720.74 43.8803   1 
  -1   0  -2 2.82409 0.57044   1 
  -1   0  -2 2.04647 0.51651   1 
   1   0   2 3.48581 0.59598   1 
   1   0   2 1.88511 0.53761   1 
  -2   0  -2 176.099 5.42622   1 
   2   0   2 166.506 5.02855   7 
   2   0   2 167.996 5.17298   2 
   2   0   2 170.924 5.39177   1 
   2   0   2 162.482 5.17882   2 
  -3   0  -2 898.223 24.5881   1 
  -3   0  -2 856.992 24.5504   1 
   3   0   2 911.425 24.3041   2 
   3   0   2 891.445 24.0677   7 
   3   0   2 906.330 24.3451   2 
   3   0   2 933.494 24.5790   1 
  -4   0  -2 1396.14 38.4259   1 
  -4   0  -2 1435.92 37.4332   4 
   4   0   2 1440.55 38.1496   2 
   4   0   2 1458.97 37.8288   7 
   4   0   2 1417.18 38.3948   1 
   4   0   2 1387.52 38.0542   2 
  -5   0  -2 499.811 13.2145   6 
  -5   0  -2 495.239 13.5597   4 
  -5   0  -2 485.351 14.9030   1 
   5   0   2 491.487 14.1812   7 
   5   0   2 499.617 14.8562   1 
   5   0   2 487.718 14.5099   2 
   5   0   2 498.148 14.5886   2 
  -6   0  -2 472.419 12.4396   6 
  -6   0  -2 460.844 14.6469   1 
   6   0   2 487.385 14.3431   2 
   6   0   2 472.338 14.1892   2 
   6   0   2 452.612 14.4648   1 
   6   0   2 461.043 13.7934   7 
  -7   0  -2 9.33421 2.25048   1 
   7   0   2 7.90108 1.64404   7 
   7   0   2 6.79338 1.66670   2 
   7   0   2 6.21467 1.70074   2 
   7   0   2 11.8016 2.30291   1 
  -8   0  -2 7.74552 2.51003   1 
   8   0   2 7.61322 1.86272   7 
   8   0   2 6.62752 1.87934   2 
   8   0   2 7.03836 2.15657   1 
   8   0   2 6.39416 1.75641   2 
  -9   0  -2 12.3867 3.00141   1 
   9   0   2 11.5972 2.33307   7 
   9   0   2 10.8328 2.39579   2 
   9   0   2 16.8109 3.11440   1 
   9   0   2 11.5601 2.40655   2 
 -10   0  -2 -2.0455 2.37761   1 
  10   0   2 0.99454 2.00979   2 
  10   0   2 2.79385 2.29693   1 
  10   0   2 -0.2811 1.94195   7 
 -11   0  -2 1.21285 2.71730   1 
  11   0   2 0.96716 2.38242   7 
  11   0   2 3.49532 3.20113   1 
 -12   0  -2 9.44156 3.66066   1 
  12   0   2 16.0075 3.72235   7 
 -13   0  -2 8.66541 4.28207   1 
  13   0   2 1.69241 3.17838   7 
 -14   0  -2 4.54233 3.93862   1 
  14   0   2 1.37336 3.68194   7 
 -15   0  -2 -1.4659 4.09903   1 
  15   0   2 1.75513 3.99664   7 
 -16   0  -2 1.34314 4.90323   1 
  17  -1  -2 9.40117 4.87730   7 
 -17   1   2 10.7391 5.21396   1 
  16  -1  -2 21.2798 4.91515   7 
 -16   1   2 19.6377 5.15270   1 
  15  -1  -2 65.7793 6.51459   7 
 -15   1   2 70.6752 7.23822   1 
  14  -1  -2 2.58923 2.92815   7 
 -14   1   2 -0.1723 3.25297   1 
  13  -1  -2 171.933 8.47582   7 
 -13   1   2 181.532 9.44642   1 
  12  -1  -2 17.7517 3.37943   2 
  12  -1  -2 18.9805 3.18956   7 
 -12   1   2 13.7638 3.42070   1 
  11  -1  -2 282.852 10.6000   7 
  11  -1  -2 295.938 11.1706   2 
  11  -1  -2 305.611 11.3668   2 
 -11   1   2 303.846 10.1449   4 
 -11   1   2 303.908 11.7539   1 
  10  -1  -2 58.1366 4.68709   1 
  10  -1  -2 53.9167 4.06568   2 
  10  -1  -2 53.1183 4.36371   2 
  10  -1  -2 54.1734 3.96655   7 
 -10   1   2 54.1511 3.48484   4 
 -10   1   2 51.9313 4.67511   1 
   9  -1  -2 286.336 10.2501   1 
   9  -1  -2 296.278 10.1337   2 
   9  -1  -2 297.649 10.1833   2 
   9  -1  -2 304.296 9.76801   7 
  -9   1   2 266.287 10.3570   1 
  -9   1   2 281.704 9.43138   4 
   8  -1  -2 194.862 7.51607   1 
   8  -1  -2 204.090 7.40184   2 
   8  -1  -2 203.843 7.35723   2 
   8  -1  -2 193.045 6.98343   7 
  -8   1   2 202.837 7.78070   1 
  -8   1   2 200.514 6.97608   4 
   7  -1  -2 807.146 22.7016   2 
   7  -1  -2 792.323 22.7337   2 
   7  -1  -2 810.864 22.9982   1 
   7  -1  -2 795.715 22.3594   7 
  -7   1   2 841.042 23.2308   1 
  -7   1   2 805.201 22.4514   4 
   6  -1  -2 6.85380 1.26848   2 
   6  -1  -2 9.24007 1.61690   1 
   6  -1  -2 8.15706 1.29182   7 
   6  -1  -2 7.16871 1.22055   2 
  -6   1   2 7.74711 1.57647   1 
  -6   1   2 9.25128 1.43818   4 
   5  -1  -2 16.4354 1.42265   2 
   5  -1  -2 19.7561 1.63573   2 
   5  -1  -2 17.0646 1.40526   7 
   5  -1  -2 20.8902 1.81864   1 
  -5   1   2 20.5088 1.94395   1 
  -5   1   2 20.8204 1.75497   4 
   4  -1  -2 660.394 17.4676   7 
   4  -1  -2 649.025 17.6398   2 
   4  -1  -2 637.326 17.8767   1 
   4  -1  -2 633.349 17.6359   2 
  -4   1   2 656.922 17.9047   1 
  -4   1   2 666.657 17.9749   1 
  -4   1   2 652.673 17.7946   4 
   3  -1  -2 180.207 5.33742   2 
   3  -1  -2 183.325 5.21441   7 
   3  -1  -2 180.394 5.55307   1 
   3  -1  -2 179.816 5.32125   2 
  -3   1   2 185.324 5.59739   1 
  -3   1   2 186.029 5.57802   4 
  -3   1   2 186.754 5.56928   1 
   2  -1  -2 13.9954 0.80159   2 
   2  -1  -2 14.1858 0.97206   1 
   2  -1  -2 13.5318 0.79100   2 
  -2   1   2 13.8097 0.90298   3 
  -2   1   2 15.3947 1.07020   1 
   1  -1  -2 0.45495 0.35094   1 
   1  -1  -2 1.04185 0.28632   2 
   1  -1  -2 0.06000 0.21887   2 
   1  -1  -2 0.28476 0.34431   1 
   1  -1  -2 0.02755 0.31358   5 
  -1   1   2 0.89724 0.27654   3 
  -1   1   2 0.33783 0.32992   1 
  -1   1   2 1.18925 0.38715   5 
  -1   1   2 0.14482 0.31210   1 
   0  -1  -2 126.432 3.92531   5 
   0  -1  -2 127.764 3.97493   1 
   0   1   2 132.797 3.96172   5 
   0   1   2 122.558 3.95027   1 
   0   1   2 132.866 3.99846   1 
  -1  -1  -2 1334.22 36.0534   1 
   1   1   2 1328.22 35.8620   2 
   1   1   2 1340.00 36.0657   1 
   1   1   2 1398.93 35.9185   2 
   1   1   2 1423.24 35.9076   7 
  -2  -1  -2 3618.00 97.8555   1 
   2   1   2 3631.38 97.4223   7 
   2   1   2 3790.23 97.9106   1 
   2   1   2 3869.39 97.7130   2 
   2   1   2 3872.27 97.6953   2 
   3   1   2 32.6889 2.21054   1 
   3   1   2 33.2951 1.99664   2 
   3   1   2 27.7824 1.88120   2 
   3   1   2 29.7710 1.79944   7 
  -4  -1  -2 540.049 16.1193   1 
  -4  -1  -2 545.245 16.1433   1 
   4   1   2 541.985 15.6990   2 
   4   1   2 533.630 16.0070   1 
   4   1   2 562.316 15.8047   2 
   4   1   2 564.118 15.4457   7 
  -5  -1  -2 15.3939 1.31098   6 
  -5  -1  -2 12.7869 2.04355   1 
  -5  -1  -2 11.9573 1.98594   1 
   5   1   2 14.8680 1.83765   2 
   5   1   2 14.7126 2.16125   1 
   5   1   2 13.6623 1.65584   7 
   5   1   2 14.6498 1.82106   2 
  -6  -1  -2 2.94257 0.82041   6 
  -6  -1  -2 1.40997 1.61720   1 
   6   1   2 3.80590 1.37264   2 
   6   1   2 2.53337 1.26516   7 
   6   1   2 3.38121 1.42646   2 
   6   1   2 1.96953 1.54637   1 
  -7  -1  -2 5.28867 0.93886   6 
  -7  -1  -2 6.07040 2.25640   1 
   7   1   2 6.61730 1.80603   2 
   7   1   2 7.01406 1.70754   7 
   7   1   2 4.28369 1.81832   1 
   7   1   2 6.27758 1.66224   2 
  -8  -1  -2 25.1676 3.54875   1 
   8   1   2 28.7838 3.10765   7 
   8   1   2 22.0100 2.96843   2 
   8   1   2 22.5510 2.77211   2 
   8   1   2 20.8302 2.96787   1 
  -9  -1  -2 8.27890 2.81977   1 
   9   1   2 8.10186 2.22127   2 
   9   1   2 10.3484 2.81795   1 
   9   1   2 6.31040 2.37816   7 
   9   1   2 6.58899 2.22115   2 
 -10  -1  -2 -0.0341 2.54469   1 
  10   1   2 7.28319 2.81854   1 
  10   1   2 2.93595 2.45960   2 
  10   1   2 1.94853 2.22903   7 
 -11  -1  -2 12.5418 3.85635   1 
  11   1   2 13.6486 3.08758   7 
 -12  -1  -2 39.8111 5.59892   1 
  12   1   2 26.6878 4.15662   7 
 -13  -1  -2 9.95670 4.26204   1 
  13   1   2 9.72961 3.72666   7 
 -14  -1  -2 16.8233 5.06619   1 
  14   1   2 12.3734 4.31709   7 
 -15  -1  -2 -3.1164 4.17236   1 
  15   1   2 -1.2591 3.93955   7 
 -16  -1  -2 5.88544 4.96496   1 
  18  -2  -2 46.6560 7.05174   7 
 -18   2   2 55.6481 7.70703   1 
  17  -2  -2 13.3633 4.71201   7 
 -17   2   2 16.6954 5.48890   1 
  16  -2  -2 0.85760 3.70625   7 
 -16   2   2 -3.1002 3.89141   1 
  15  -2  -2 50.9109 5.65834   7 
 -15   2   2 39.4061 5.81381   1 
  14  -2  -2 19.5680 3.82802   7 
 -14   2   2 13.0956 4.04725   1 
  13  -2  -2 206.838 8.97865   7 
 -13   2   2 180.211 9.54907   1 
  12  -2  -2 41.9219 4.22857   7 
  12  -2  -2 64.2639 5.45897   2 
 -12   2   2 46.8889 5.01586   1 
  11  -2  -2 176.751 7.85137   2 
  11  -2  -2 169.990 7.40281   7 
  11  -2  -2 175.966 8.02673   1 
  11  -2  -2 165.166 7.86937   2 
 -11   2   2 181.764 6.84044   4 
 -11   2   2 187.565 8.47256   1 
  10  -2  -2 110.995 5.71823   2 
  10  -2  -2 112.886 5.79624   2 
  10  -2  -2 123.565 6.10224   1 
  10  -2  -2 108.971 5.39814   7 
 -10   2   2 103.845 6.09516   1 
 -10   2   2 112.916 4.96908   4 
   9  -2  -2 652.456 18.9351   7 
   9  -2  -2 653.192 19.4087   2 
   9  -2  -2 632.982 19.3132   2 
   9  -2  -2 666.713 19.6650   1 
  -9   2   2 631.673 18.5907   4 
  -9   2   2 647.548 19.8849   1 
   8  -2  -2 95.3197 4.82391   1 
   8  -2  -2 107.804 4.75239   2 
   8  -2  -2 95.4127 4.36469   7 
   8  -2  -2 96.6000 4.62515   2 
  -8   2   2 99.1836 4.20624   4 
  -8   2   2 102.457 5.11484   1 
   7  -2  -2 439.087 13.2102   7 
   7  -2  -2 455.561 13.5914   2 
   7  -2  -2 471.432 13.9388   1 
   7  -2  -2 446.498 13.5625   2 
  -7   2   2 459.810 14.0058   1 
  -7   2   2 445.980 13.2317   4 
   6  -2  -2 180.275 5.91970   7 
   6  -2  -2 177.133 6.19257   2 
   6  -2  -2 173.059 6.40292   1 
   6  -2  -2 176.485 6.16635   2 
  -6   2   2 187.388 6.61605   1 
  -6   2   2 178.951 6.03626   4 
   5  -2  -2 63.0010 2.79430   2 
   5  -2  -2 56.0025 2.54913   7 
   5  -2  -2 66.3234 2.84557   2 
   5  -2  -2 60.2065 3.02709   1 
  -5   2   2 59.9832 2.75161   4 
  -5   2   2 57.8894 3.04455   1 
   4  -2  -2 127.800 4.27906   2 
   4  -2  -2 126.679 4.09107   7 
   4  -2  -2 118.955 4.42154   1 
   4  -2  -2 128.664 4.26658   2 
  -4   2   2 123.165 4.49959   1 
   3  -2  -2 68.5948 2.83255   5 
   3  -2  -2 72.4282 2.69473   2 
   3  -2  -2 71.4157 2.57681   7 
   3  -2  -2 73.5829 2.72169   2 
   3  -2  -2 73.9345 2.87846   1 
  -3   2   2 66.5123 2.86395   1 
   2  -2  -2 746.427 19.6943   1 
   2  -2  -2 703.041 19.4899   2 
   2  -2  -2 737.742 19.3709   7 
   2  -2  -2 730.960 19.5249   2 
   2  -2  -2 711.078 19.5948   5 
  -2   2   2 711.120 19.6169   5 
  -2   2   2 714.074 19.0243   3 
  -2   2   2 773.362 19.7515   1 
   1  -2  -2 81.9056 2.97556   5 
  -1   2   2 85.1195 3.06871   1 
  -1   2   2 82.0075 2.98655   5 
   0  -2  -2 1195.89 31.7317   5 
   0  -2  -2 1216.16 31.7718   1 
   0   2   2 1194.95 31.5491   2 
   0   2   2 1164.12 31.7000   5 
   0   2   2 1152.75 31.5030   2 
   0   2   2 1204.71 31.3705   7 
   0   2   2 1213.65 31.7502   1 
  -1  -2  -2 152.885 5.29734   1 
   1   2   2 155.207 5.30605   1 
   1   2   2 160.599 5.11249   2 
   1   2   2 165.368 4.95700   7 
  -2  -2  -2 233.119 7.67949   1 
   2   2   2 241.883 7.69980   1 
   2   2   2 238.745 7.42955   2 
   2   2   2 244.581 7.20004   7 
  -3  -2  -2 55.6698 3.26444   1 
   3   2   2 55.3066 3.19519   1 
   3   2   2 66.1684 2.99567   2 
   3   2   2 60.4701 2.80504   7 
   3   2   2 70.3238 3.13830   2 
  -4  -2  -2 71.1316 3.79591   1 
   4   2   2 66.4118 3.54692   1 
   4   2   2 59.2769 3.26999   2 
   4   2   2 60.1216 3.04206   7 
  -5  -2  -2 71.9706 3.19741   6 
  -5  -2  -2 76.1768 4.29920   1 
   5   2   2 75.1283 3.81043   2 
   5   2   2 70.9835 4.05355   1 
   5   2   2 75.8923 3.84780   2 
   5   2   2 70.2721 3.50732   7 
  -6  -2  -2 34.2972 2.17389   6 
  -6  -2  -2 30.1097 3.34802   1 
  -6  -2  -2 33.1638 3.48458   1 
   6   2   2 28.6208 2.75003   2 
   6   2   2 33.0776 3.19178   1 
   6   2   2 31.1683 2.89154   2 
   6   2   2 36.0832 2.88627   7 
  -7  -2  -2 13.3090 2.70203   1 
  -7  -2  -2 18.1510 1.80383   6 
   7   2   2 13.2552 2.24052   7 
   7   2   2 11.9175 2.07451   2 
   7   2   2 16.7227 2.71381   1 
   7   2   2 11.7221 2.18550   2 
  -8  -2  -2 1.94031 2.22620   1 
   8   2   2 1.17635 2.01412   1 
   8   2   2 1.15589 1.80251   7 
   8   2   2 -1.1036 1.53814   2 
   8   2   2 2.75680 1.84739   2 
  -9  -2  -2 5.48248 2.84986   1 
   9   2   2 4.85316 2.29524   7 
   9   2   2 2.98528 2.31697   1 
   9   2   2 3.04666 2.13135   2 
 -10  -2  -2 7.36755 3.10343   1 
  10   2   2 7.53194 2.70993   7 
 -11  -2  -2 38.1536 5.15641   1 
  11   2   2 47.2373 4.78448   7 
 -12  -2  -2 14.2304 4.41006   1 
  12   2   2 13.4252 3.77050   7 
 -13  -2  -2 4.77617 4.03229   1 
  13   2   2 10.3268 3.76702   7 
 -14  -2  -2 5.53067 4.53232   1 
  14   2   2 2.29317 4.07651   7 
 -15  -2  -2 9.35462 5.25659   1 
  15   2   2 -4.0799 4.20661   7 
  18  -3  -2 8.09886 6.26751   7 
 -18   3   2 7.70707 5.28225   1 
  17  -3  -2 56.9632 6.92263   7 
 -17   3   2 66.0004 7.80677   1 
  16  -3  -2 2.37004 3.65261   7 
 -16   3   2 0.07126 3.93967   1 
  15  -3  -2 134.693 8.19707   7 
 -15   3   2 128.050 8.93119   1 
  14  -3  -2 1.59972 3.03456   7 
 -14   3   2 2.14636 3.30488   1 
  13  -3  -2 167.047 8.06102   7 
 -13   3   2 162.716 8.89759   1 
  12  -3  -2 147.105 7.29918   7 
  12  -3  -2 181.100 8.41869   1 
  12  -3  -2 163.009 7.95102   2 
 -12   3   2 165.040 8.48419   1 
 -12   3   2 164.498 6.78725   4 
  11  -3  -2 144.001 6.45001   7 
  11  -3  -2 132.079 6.65721   2 
  11  -3  -2 131.806 6.65489   2 
  11  -3  -2 123.890 6.70833   1 
 -11   3   2 131.587 5.63940   4 
 -11   3   2 132.256 7.21221   1 
  10  -3  -2 122.914 5.81786   7 
  10  -3  -2 129.192 6.21968   2 
  10  -3  -2 132.361 6.28317   2 
  10  -3  -2 135.986 6.62308   1 
 -10   3   2 136.575 6.88391   1 
 -10   3   2 134.326 5.51730   4 
   9  -3  -2 330.411 10.8545   7 
   9  -3  -2 333.794 11.2191   2 
   9  -3  -2 337.521 11.5562   1 
   9  -3  -2 345.810 11.3568   2 
  -9   3   2 336.501 11.7693   1 
  -9   3   2 320.980 10.5311   4 
   8  -3  -2 148.789 6.28300   1 
   8  -3  -2 140.494 5.89841   2 
   8  -3  -2 145.200 5.99079   2 
   8  -3  -2 148.148 4.21323   6 
   8  -3  -2 142.137 5.61107   7 
  -8   3   2 152.326 6.43083   1 
  -8   3   2 138.481 5.44890   4 
   7  -3  -2 54.1392 2.92778   7 
   7  -3  -2 53.4211 3.42739   1 
   7  -3  -2 53.0368 3.09910   2 
  -7   3   2 50.3293 2.86677   4 
  -7   3   2 50.2694 3.41827   1 
   6  -3  -2 218.617 7.27442   2 
   6  -3  -2 219.211 7.27659   2 
   6  -3  -2 209.866 7.43223   1 
   6  -3  -2 213.048 6.95987   7 
  -6   3   2 214.600 7.57511   1 
   5  -3  -2 17.1482 1.60526   7 
   5  -3  -2 18.6048 1.72195   2 
   5  -3  -2 18.6481 1.96971   1 
   5  -3  -2 17.9703 1.70325   2 
  -5   3   2 17.1109 1.99773   1 
   4  -3  -2 189.240 6.31104   1 
   4  -3  -2 184.293 5.84070   7 
   4  -3  -2 182.825 6.21924   5 
   4  -3  -2 185.683 6.07859   2 
   4  -3  -2 193.079 6.10821   2 
  -4   3   2 185.381 6.32900   1 
   3  -3  -2 0.33291 0.63583   7 
   3  -3  -2 0.60762 0.78198   5 
   3  -3  -2 -1.3288 0.48952   2 
   3  -3  -2 -0.2186 0.76883   1 
   3  -3  -2 0.65947 0.62773   2 
  -3   3   2 -0.8179 0.73058   5 
  -3   3   2 -0.1170 0.80252   1 
   2  -3  -2 1049.80 28.3650   1 
   2  -3  -2 1053.56 27.9578   7 
   2  -3  -2 1044.13 28.3088   5 
  -2   3   2 1087.16 28.3786   5 
  -2   3   2 1027.05 28.3792   1 
   1  -3  -2 32.5617 1.99300   1 
   1  -3  -2 30.8294 1.96528   5 
  -1   3   2 34.1069 1.71252   7 
  -1   3   2 34.7198 2.04553   1 
  -1   3   2 31.4509 2.02158   5 
  -1   3   2 32.8653 1.81057   2 
   0  -3  -2 65.6779 3.03970   5 
   0  -3  -2 68.7829 3.06471   1 
   0   3   2 65.3600 2.78820   2 
   0   3   2 68.7328 2.81985   2 
   0   3   2 66.3518 2.77904   2 
   0   3   2 68.0102 3.10183   1 
   0   3   2 71.1686 3.12596   5 
  -1  -3  -2 152.736 5.53046   1 
   1   3   2 161.775 5.68447   5 
   1   3   2 152.604 5.21475   2 
   1   3   2 145.903 5.14454   2 
   1   3   2 155.488 5.52253   1 
   1   3   2 153.960 4.98833   7 
  -2  -3  -2 5.37588 1.37437   1 
   2   3   2 6.66577 1.15805   2 
   2   3   2 5.54037 1.41006   5 
   2   3   2 3.58863 1.05183   2 
   2   3   2 3.89901 1.24866   1 
   2   3   2 3.53641 0.99183   7 
  -3  -3  -2 111.535 4.90988   1 
   3   3   2 108.431 4.49737   2 
   3   3   2 111.044 4.70455   1 
   3   3   2 106.279 4.95436   5 
   3   3   2 100.367 4.35432   2 
   3   3   2 104.937 4.17390   7 
  -4  -3  -2 19.4236 2.47819   1 
  -4  -3  -2 21.3551 2.11651   6 
   4   3   2 20.0655 2.10562   2 
   4   3   2 21.8897 2.13402   7 
   4   3   2 15.2047 1.86178   2 
   4   3   2 23.6825 2.56344   1 
  -5  -3  -2 171.158 6.12354   6 
   5   3   2 164.504 6.84509   1 
   5   3   2 162.504 6.16056   7 
   5   3   2 166.901 6.48907   2 
   5   3   2 162.342 6.58292   2 
  -6  -3  -2 38.6298 2.89454   6 
  -6  -3  -2 40.7331 3.92089   1 
   6   3   2 37.0283 3.28599   2 
   6   3   2 37.4685 3.64726   1 
   6   3   2 34.9481 3.05535   7 
   6   3   2 38.5185 3.33329   2 
  -7  -3  -2 1.01062 2.10413   1 
  -7  -3  -2 1.33253 2.15748   1 
  -7  -3  -2 -1.1463 1.21487   6 
   7   3   2 -1.0401 1.76625   1 
   7   3   2 -2.9949 1.49713   7 
   7   3   2 -1.1326 1.43450   2 
   7   3   2 1.63434 1.53454   2 
  -8  -3  -2 7.36376 2.83534   1 
   8   3   2 3.13970 2.21557   1 
   8   3   2 5.42499 2.13594   2 
   8   3   2 2.46354 2.05208   7 
   8   3   2 1.32559 1.95859   2 
  -9  -3  -2 87.8100 6.98195   1 
   9   3   2 89.3062 5.60859   7 
   9   3   2 91.7937 6.01408   2 
 -10  -3  -2 13.9024 3.75730   1 
  10   3   2 12.0747 3.07483   7 
 -11  -3  -2 23.3627 4.64187   1 
  11   3   2 24.3535 4.04760   7 
 -12  -3  -2 12.3042 4.37898   1 
  12   3   2 13.0960 3.88711   7 
 -13  -3  -2 -5.3667 3.67711   1 
  13   3   2 3.56514 3.89691   7 
 -14  -3  -2 41.1367 6.64662   1 
  14   3   2 45.6557 6.19426   7 
 -15  -3  -2 15.3032 5.62098   1 
 -18   4   2 3.30940 4.87443   1 
  17  -4  -2 63.3327 7.00228   7 
 -17   4   2 57.8477 7.44625   1 
  16  -4  -2 5.71744 3.76796   7 
 -16   4   2 10.3078 4.53496   1 
  15  -4  -2 135.464 8.29668   7 
 -15   4   2 144.157 9.14851   1 
  14  -4  -2 20.1195 3.88009   7 
 -14   4   2 22.6778 4.56568   1 
  13  -4  -2 189.674 8.67525   7 
 -13   4   2 190.214 9.72735   1 
  12  -4  -2 97.7040 6.52837   1 
  12  -4  -2 114.967 6.09596   7 
  12  -4  -2 104.961 6.63570   2 
 -12   4   2 100.590 5.05033   4 
 -12   4   2 103.976 6.82712   1 
  11  -4  -2 278.388 10.8458   1 
  11  -4  -2 272.906 10.4426   2 
  11  -4  -2 273.311 10.0303   7 
  11  -4  -2 273.012 10.5472   2 
 -11   4   2 282.604 11.1295   1 
 -11   4   2 264.527 9.33953   4 
  10  -4  -2 112.741 6.04738   1 
  10  -4  -2 111.852 5.66997   2 
  10  -4  -2 123.501 5.93837   2 
  10  -4  -2 106.403 5.32987   7 
 -10   4   2 114.362 5.07711   4 
 -10   4   2 94.6117 5.93876   1 
   9  -4  -2 190.971 7.76014   1 
   9  -4  -2 190.980 7.55976   2 
   9  -4  -2 193.165 5.66068   6 
   9  -4  -2 182.809 7.46987   2 
   9  -4  -2 193.898 7.17381   7 
  -9   4   2 185.249 7.94124   1 
  -9   4   2 186.313 6.86570   4 
   8  -4  -2 56.2719 2.48764   6 
   8  -4  -2 53.5082 3.86092   1 
   8  -4  -2 57.8049 3.60672   2 
  -8   4   2 56.9317 4.05781   1 
  -8   4   2 57.5762 3.32731   4 
   7  -4  -2 2.73858 1.19067   2 
   7  -4  -2 0.89626 1.12761   7 
   7  -4  -2 1.43141 1.46207   1 
   7  -4  -2 1.49091 1.16773   2 
  -7   4   2 0.12167 1.47803   1 
   6  -4  -2 725.000 21.1527   5 
   6  -4  -2 709.326 21.0987   1 
   6  -4  -2 741.323 20.9188   2 
   6  -4  -2 721.129 20.4877   7 
   6  -4  -2 770.093 20.9402   2 
  -6   4   2 747.145 21.3047   1 
   5  -4  -2 194.304 6.59426   2 
   5  -4  -2 187.913 6.75645   5 
   5  -4  -2 188.564 6.28717   7 
   5  -4  -2 190.946 6.60337   2 
   5  -4  -2 186.445 6.82032   1 
  -5   4   2 193.156 6.94272   1 
   4  -4  -2 143.433 5.40023   5 
   4  -4  -2 148.863 5.04344   7 
   4  -4  -2 145.145 5.24076   2 
   4  -4  -2 144.164 5.48401   1 
   4  -4  -2 150.797 5.30688   2 
  -4   4   2 145.010 5.45856   5 
  -4   4   2 155.053 5.63961   1 
   3  -4  -2 93.8375 3.92106   1 
   3  -4  -2 94.3039 3.49511   7 
   3  -4  -2 91.0476 3.82167   5 
  -3   4   2 90.6745 3.91965   1 
  -3   4   2 84.4385 3.77233   5 
   2  -4  -2 42.7483 2.49416   5 
   2  -4  -2 41.7051 2.56578   1 
  -2   4   2 45.6721 2.61860   1 
  -2   4   2 46.4507 2.20063   7 
  -2   4   2 49.2446 2.66803   5 
   1  -4  -2 238.858 7.72640   5 
   1  -4  -2 241.491 7.78466   1 
  -1   4   2 243.505 7.47747   2 
  -1   4   2 242.824 7.80371   1 
  -1   4   2 221.437 7.39648   2 
  -1   4   2 224.790 7.69505   5 
  -1   4   2 239.555 7.20641   7 
   0  -4  -2 797.852 22.5665   5 
   0  -4  -2 796.472 22.5342   1 
   0   4   2 807.280 22.6578   5 
   0   4   2 836.920 22.2493   2 
   0   4   2 789.779 21.8487   7 
   0   4   2 811.054 22.2248   2 
   0   4   2 780.983 22.4824   1 
  -1  -4  -2 188.044 7.06651   5 
  -1  -4  -2 194.028 7.05371   1 
   1   4   2 196.537 6.69754   2 
   1   4   2 207.339 6.48251   7 
   1   4   2 195.371 7.19976   5 
   1   4   2 205.587 6.71954   2 
   1   4   2 204.318 6.48603   7 
   1   4   2 188.937 6.99049   1 
  -2  -4  -2 20.8071 2.36568   1 
   2   4   2 20.5350 2.51091   5 
   2   4   2 27.2120 2.66121   1 
   2   4   2 19.8509 1.95568   2 
   2   4   2 23.4855 2.17298   2 
   2   4   2 21.7789 1.94744   7 
  -3  -4  -2 3.30575 1.55683   1 
   3   4   2 3.16292 1.17491   2 
   3   4   2 3.70708 1.26584   2 
   3   4   2 2.18953 1.58430   5 
   3   4   2 2.76192 1.22676   7 
   3   4   2 0.43754 1.19856   1 
  -4  -4  -2 14.0577 2.43544   1 
  -4  -4  -2 14.5868 2.07634   6 
   4   4   2 11.2614 1.76792   7 
   4   4   2 13.9487 2.53418   5 
   4   4   2 11.2237 1.88131   2 
   4   4   2 10.4269 1.78081   2 
   4   4   2 9.58278 2.05967   1 
  -5  -4  -2 312.156 11.0313   1 
  -5  -4  -2 310.028 10.1485   6 
   5   4   2 304.958 10.0380   7 
   5   4   2 292.524 10.3309   2 
   5   4   2 290.265 10.7078   1 
   5   4   2 310.658 11.2729   5 
   5   4   2 296.292 10.4612   2 
  -6  -4  -2 -0.9183 1.40720   6 
  -6  -4  -2 0.88056 2.02695   1 
   6   4   2 0.20602 1.64741   7 
   6   4   2 -1.4233 1.97895   5 
   6   4   2 -0.3681 1.38196   2 
   6   4   2 -1.0879 1.46352   2 
   6   4   2 -0.4168 1.88093   1 
  -7  -4  -2 248.852 10.4944   1 
  -7  -4  -2 239.833 10.3841   1 
  -7  -4  -2 265.738 9.01930   6 
   7   4   2 246.530 9.83021   2 
   7   4   2 247.642 9.39687   7 
   7   4   2 265.069 10.8206   5 
   7   4   2 259.062 10.1640   1 
   7   4   2 251.218 9.81174   2 
  -8  -4  -2 50.7350 5.35996   1 
  -8  -4  -2 60.1564 5.49972   1 
   8   4   2 69.7669 5.65621   1 
   8   4   2 62.3861 6.11955   5 
   8   4   2 53.2024 4.54571   7 
   8   4   2 60.6086 5.21709   2 
  -9  -4  -2 190.991 9.49954   1 
   9   4   2 177.812 9.51725   5 
   9   4   2 188.465 8.53238   7 
 -10  -4  -2 -0.2802 2.96275   1 
  10   4   2 -0.6776 2.65830   7 
  10   4   2 1.01498 2.99690   5 
 -11  -4  -2 1.79596 3.51832   1 
  11   4   2 1.21794 3.17646   7 
 -12  -4  -2 48.0168 6.33888   1 
  12   4   2 40.2491 5.48940   7 
 -13  -4  -2 70.1247 7.95435   1 
  13   4   2 67.4460 7.13546   7 
 -14  -4  -2 48.8705 7.16789   1 
  14   4   2 55.4112 6.94402   7 
 -18   5   2 15.8042 5.41946   1 
  17  -5  -2 28.4018 5.19566   7 
 -17   5   2 32.0867 6.30257   1 
  16  -5  -2 15.2583 4.22337   7 
 -16   5   2 9.28498 4.56707   1 
  15  -5  -2 30.9475 4.85816   7 
 -15   5   2 36.3525 5.67174   1 
  14  -5  -2 116.709 7.17877   7 
 -14   5   2 116.094 8.15714   1 
  13  -5  -2 159.345 8.74770   1 
  13  -5  -2 190.651 8.46512   7 
 -13   5   2 181.454 9.42148   1 
  12  -5  -2 58.3235 5.30928   1 
  12  -5  -2 49.6001 4.34657   7 
 -12   5   2 47.4235 5.12758   1 
 -12   5   2 54.0084 3.80472   4 
  11  -5  -2 46.7139 3.98968   7 
  11  -5  -2 44.1301 4.23382   2 
  11  -5  -2 37.4692 4.42922   1 
 -11   5   2 46.1669 3.67758   4 
 -11   5   2 37.3862 4.35490   1 
  10  -5  -2 49.4853 2.33911   6 
  10  -5  -2 55.4431 4.22288   7 
  10  -5  -2 44.1106 3.89013   2 
  10  -5  -2 60.1307 4.93620   1 
  10  -5  -2 46.8906 4.13531   2 
 -10   5   2 53.0535 3.47820   4 
 -10   5   2 47.3410 4.69901   1 
   9  -5  -2 66.4034 4.22969   2 
   9  -5  -2 68.9767 4.69879   1 
   9  -5  -2 71.3276 4.30802   2 
   9  -5  -2 72.6874 4.07912   7 
   9  -5  -2 68.9286 3.15382   6 
  -9   5   2 73.5957 4.77745   1 
   8  -5  -2 16.6243 1.76007   6 
   8  -5  -2 14.0574 2.02510   2 
   8  -5  -2 22.8319 2.81544   1 
   8  -5  -2 13.5914 2.15878   2 
   8  -5  -2 17.8838 2.26902   7 
  -8   5   2 15.1219 2.64304   1 
   7  -5  -2 77.7147 4.41901   1 
   7  -5  -2 86.9569 4.51537   5 
   7  -5  -2 92.5057 4.43666   2 
   7  -5  -2 80.3307 4.24864   2 
   7  -5  -2 85.4258 3.98203   7 
  -7   5   2 87.9391 4.76142   1 
   6  -5  -2 55.8650 3.26689   2 
   6  -5  -2 58.3577 3.15147   7 
   6  -5  -2 63.3223 3.79175   1 
   6  -5  -2 60.5680 3.40243   2 
   6  -5  -2 58.1576 3.51996   5 
  -6   5   2 56.8828 3.67731   1 
   5  -5  -2 -0.4984 1.17538   5 
   5  -5  -2 -0.7051 1.02343   7 
   5  -5  -2 0.58742 0.99560   2 
   5  -5  -2 1.20974 1.34119   1 
  -5   5   2 1.22797 1.41026   1 
   4  -5  -2 2.89517 1.34809   1 
   4  -5  -2 3.39333 1.34726   5 
  -4   5   2 0.93543 1.22217   1 
  -4   5   2 0.81777 0.97533   7 
  -4   5   2 3.54699 1.46152   5 
   3  -5  -2 4.84973 1.41400   1 
   3  -5  -2 8.66737 1.55385   5 
   3  -5  -2 5.45572 1.13906   7 
  -3   5   2 6.21203 1.20287   7 
  -3   5   2 5.39558 1.49564   1 
  -3   5   2 4.33518 1.46461   5 
   2  -5  -2 0.21010 1.16221   1 
   2  -5  -2 1.90999 1.20440   5 
  -2   5   2 4.15364 1.32451   5 
  -2   5   2 2.47415 0.98284   2 
  -2   5   2 0.08150 1.12464   1 
   1  -5  -2 4.96988 1.48543   1 
   1  -5  -2 5.39709 1.57708   5 
  -1   5   2 2.56527 1.08270   7 
  -1   5   2 5.70778 1.54028   1 
  -1   5   2 6.39381 1.29927   2 
  -1   5   2 5.05981 1.18060   2 
  -1   5   2 5.54805 1.62827   5 
   0  -5  -2 75.3955 3.94345   1 
   0  -5  -2 73.7178 3.93047   5 
   0   5   2 71.3535 3.54950   2 
   0   5   2 74.1987 4.02514   5 
   0   5   2 71.1003 3.89762   1 
   0   5   2 76.7673 3.42144   7 
   0   5   2 74.9081 3.59348   2 
  -1  -5  -2 175.521 7.05235   1 
  -1  -5  -2 176.967 7.08551   5 
   1   5   2 193.589 6.87379   2 
   1   5   2 182.571 7.00636   1 
   1   5   2 187.644 7.27171   5 
   1   5   2 180.885 6.63630   2 
   1   5   2 188.484 6.41453   7 
   1   5   2 200.846 6.84047   2 
   1   5   2 191.698 6.44481   7 
  -2  -5  -2 184.965 7.21221   1 
   2   5   2 181.573 6.38382   7 
   2   5   2 176.269 7.24513   5 
   2   5   2 180.198 7.07415   1 
   2   5   2 165.522 6.60185   2 
   2   5   2 184.913 6.67841   2 
  -3  -5  -2 18.0551 2.71713   1 
  -3  -5  -2 14.4557 2.20893   6 
   3   5   2 15.0962 2.04605   2 
   3   5   2 13.2746 1.94462   7 
   3   5   2 13.1977 2.34954   1 
   3   5   2 15.7912 2.64697   5 
   3   5   2 18.2747 2.31176   2 
  -4  -5  -2 41.8037 4.01457   1 
  -4  -5  -2 35.8439 3.31434   6 
   4   5   2 36.4915 3.20248   2 
   4   5   2 40.1792 3.39440   2 
   4   5   2 29.0577 2.82517   7 
   4   5   2 29.7599 3.64830   5 
   4   5   2 27.6292 3.19597   1 
  -5  -5  -2 262.109 10.4830   1 
  -5  -5  -2 279.939 9.87710   6 
   5   5   2 262.427 10.0782   2 
   5   5   2 278.892 10.0667   2 
   5   5   2 280.870 9.68357   7 
   5   5   2 286.202 10.5258   1 
   5   5   2 282.860 10.9623   5 
  -6  -5  -2 7.88950 2.36135   6 
  -6  -5  -2 13.9217 3.23507   1 
   6   5   2 11.3636 2.73721   1 
   6   5   2 11.6582 2.35724   7 
   6   5   2 14.0931 2.55734   2 
   6   5   2 8.97143 2.37950   2 
   6   5   2 12.3243 3.12892   5 
  -7  -5  -2 417.623 13.6200   6 
  -7  -5  -2 434.161 15.2765   1 
   7   5   2 425.240 15.5638   5 
   7   5   2 410.002 13.9277   7 
   7   5   2 399.170 14.6140   1 
   7   5   2 407.891 14.5066   2 
  -8  -5  -2 43.3326 5.05863   1 
  -8  -5  -2 40.1653 4.97063   1 
   8   5   2 42.7288 4.32580   7 
   8   5   2 50.2336 5.62585   5 
  -9  -5  -2 21.6810 4.40389   1 
   9   5   2 25.0023 3.94074   7 
   9   5   2 38.4604 5.21005   5 
 -10  -5  -2 15.2963 4.22759   1 
  10   5   2 11.3330 3.72488   7 
 -11  -5  -2 8.33837 4.18747   1 
  11   5   2 14.9218 4.19497   7 
 -12  -5  -2 7.67618 4.62260   1 
  12   5   2 8.59579 4.31058   7 
 -13  -5  -2 40.3177 6.73444   1 
  13   5   2 45.2649 6.39582   7 
 -19   6   2 52.4906 8.11831   1 
 -18   6   2 10.8065 5.41317   1 
  17  -6  -2 60.8262 7.39598   7 
 -17   6   2 57.1507 7.57291   1 
  16  -6  -2 23.1487 4.68171   7 
 -16   6   2 19.3438 5.06888   1 
  15  -6  -2 -0.7863 2.98776   7 
 -15   6   2 -0.5922 3.59524   1 
  14  -6  -2 160.594 8.18896   7 
 -14   6   2 139.963 8.93922   1 
  13  -6  -2 202.882 9.86459   1 
  13  -6  -2 201.810 9.00546   7 
 -13   6   2 205.331 10.2369   1 
  12  -6  -2 83.1348 6.09638   1 
  12  -6  -2 78.5271 5.22449   7 
 -12   6   2 80.6091 6.60718   1 
 -12   6   2 77.4644 4.50964   4 
  11  -6  -2 -1.8228 1.85182   7 
  11  -6  -2 -0.4838 2.30716   1 
 -11   6   2 0.32573 1.67269   4 
 -11   6   2 -0.9047 2.27787   1 
  10  -6  -2 21.9702 3.42897   1 
  10  -6  -2 21.3304 3.27990   2 
  10  -6  -2 19.0382 2.91416   2 
  10  -6  -2 15.3873 2.51179   7 
  10  -6  -2 19.0968 2.01444   6 
 -10   6   2 19.8917 3.40842   1 
   9  -6  -2 171.387 6.95710   7 
   9  -6  -2 168.847 7.76375   1 
   9  -6  -2 188.284 6.51284   6 
   9  -6  -2 185.853 7.45028   2 
   9  -6  -2 161.253 7.26109   2 
  -9   6   2 177.202 7.89669   1 
   8  -6  -2 9.73952 1.92290   7 
   8  -6  -2 11.2726 1.76413   6 
   8  -6  -2 10.7856 2.30351   1 
   8  -6  -2 10.3637 2.10995   2 
   8  -6  -2 10.0663 1.98957   2 
  -8   6   2 14.4322 2.67419   1 
   7  -6  -2 13.0762 2.47434   1 
   7  -6  -2 16.3211 2.16277   7 
   7  -6  -2 13.8357 2.01602   2 
   7  -6  -2 16.3533 2.33777   2 
  -7   6   2 23.2018 3.12957   1 
   6  -6  -2 7.37103 1.85428   5 
   6  -6  -2 7.91353 2.01720   1 
   6  -6  -2 6.63103 1.50500   7 
   6  -6  -2 4.25014 1.46486   2 
  -6   6   2 4.90599 1.82735   1 
   5  -6  -2 0.73053 1.20866   5 
   5  -6  -2 -0.8503 1.05560   7 
   5  -6  -2 -0.7394 1.35411   1 
  -5   6   2 1.07319 1.10791   7 
  -5   6   2 0.74165 1.43902   1 
  -5   6   2 1.72832 1.51386   5 
   4  -6  -2 50.8363 2.91109   7 
   4  -6  -2 55.5220 3.43188   5 
   4  -6  -2 53.5349 3.50176   1 
  -4   6   2 51.6730 2.91873   7 
  -4   6   2 48.5405 3.39979   5 
  -4   6   2 57.6136 3.72737   1 
   3  -6  -2 13.7093 2.02744   5 
   3  -6  -2 14.9087 2.23775   1 
  -3   6   2 13.9227 2.14986   1 
  -3   6   2 12.9216 1.72092   2 
  -3   6   2 13.8790 2.17218   5 
  -3   6   2 14.0623 1.79928   7 
   2  -6  -2 -0.0806 1.30252   1 
   2  -6  -2 -1.2308 1.14432   5 
  -2   6   2 1.10840 1.43144   5 
  -2   6   2 -0.6458 1.25739   1 
  -2   6   2 -1.0428 0.97145   7 
  -2   6   2 1.06199 1.03146   2 
  -2   6   2 -0.9870 0.87151   2 
   1  -6  -2 107.923 5.26667   1 
   1  -6  -2 124.277 5.42955   5 
  -1   6   2 117.733 5.34095   1 
  -1   6   2 116.472 4.98108   2 
  -1   6   2 125.412 4.80246   7 
  -1   6   2 120.993 5.48521   5 
  -1   6   2 126.455 5.09367   2 
   0  -6  -2 13.4436 2.22811   1 
   0  -6  -2 12.7552 2.15237   5 
   0   6   2 10.4998 1.72187   2 
   0   6   2 15.8413 1.95452   2 
   0   6   2 16.4093 1.90402   7 
   0   6   2 16.8445 2.30856   1 
   0   6   2 9.79363 2.06896   5 
  -1  -6  -2 255.468 9.54925   1 
   1   6   2 265.659 9.05405   2 
   1   6   2 265.694 9.75968   5 
   1   6   2 266.626 9.49838   1 
   1   6   2 272.918 9.16141   2 
   1   6   2 272.440 9.18268   2 
   1   6   2 253.101 8.66895   7 
  -2  -6  -2 16.3452 2.58082   1 
  -2  -6  -2 13.7924 2.36742   6 
   2   6   2 16.1028 2.06497   7 
   2   6   2 20.8470 2.45607   2 
   2   6   2 17.9929 2.53351   1 
   2   6   2 13.5062 2.55914   5 
   2   6   2 13.0049 2.02395   2 
   2   6   2 18.6144 2.19979   7 
  -3  -6  -2 310.731 10.7131   6 
  -3  -6  -2 295.127 10.8373   1 
   3   6   2 274.656 10.1169   2 
   3   6   2 282.985 10.0541   2 
   3   6   2 292.988 10.9723   5 
   3   6   2 288.004 10.5929   1 
   3   6   2 284.478 9.74009   7 
  -4  -6  -2 5.47516 2.52340   1 
  -4  -6  -2 5.75826 2.01943   6 
   4   6   2 1.66559 1.64059   2 
   4   6   2 0.70522 1.68420   7 
   4   6   2 3.47138 2.01868   1 
   4   6   2 3.77088 2.27828   5 
   4   6   2 -1.1259 1.40366   2 
  -5  -6  -2 433.801 14.3553   6 
  -5  -6  -2 413.135 14.9379   1 
   5   6   2 398.320 14.5015   1 
   5   6   2 452.535 15.5641   5 
   5   6   2 430.890 13.9360   7 
   5   6   2 414.018 14.3978   2 
   5   6   2 449.872 14.5215   2 
  -6  -6  -2 25.3933 4.02266   1 
  -6  -6  -2 29.5569 3.69687   6 
   6   6   2 35.8297 4.02547   2 
   6   6   2 25.7292 3.74193   1 
   6   6   2 30.6549 3.57564   7 
   6   6   2 24.1308 3.98418   5 
  -7  -6  -2 45.8216 4.36250   6 
  -7  -6  -2 35.9898 4.66676   1 
   7   6   2 36.7234 4.89777   5 
   7   6   2 39.1344 4.29751   7 
  -8  -6  -2 6.02611 3.23057   1 
  -8  -6  -2 5.24560 3.33688   1 
   8   6   2 6.51066 2.89373   7 
   8   6   2 -0.0635 2.98361   5 
  -9  -6  -2 48.6658 5.96496   1 
   9   6   2 58.7426 6.59245   5 
   9   6   2 60.1011 5.60064   7 
 -10  -6  -2 33.1371 5.54609   1 
  10   6   2 30.6750 4.76455   7 
 -11  -6  -2 41.0226 6.20325   1 
  11   6   2 31.9407 5.37531   7 
 -12  -6  -2 22.8242 5.83940   1 
  12   6   2 22.9315 5.19732   7 
 -13  -6  -2 37.0493 6.70412   1 
  13   6   2 34.2333 6.35707   7 
 -19   7   2 20.5289 6.64770   1 
 -18   7   2 -6.8808 4.52710   1 
 -17   7   2 24.6693 6.04793   1 
  16  -7  -2 7.72946 4.00536   7 
 -16   7   2 16.9550 5.37904   1 
  15  -7  -2 15.7911 3.75974   7 
 -15   7   2 15.9824 4.65447   1 
  14  -7  -2 3.79275 3.41117   1 
  14  -7  -2 7.77837 3.19207   7 
 -14   7   2 10.6352 3.97950   1 
  13  -7  -2 125.325 6.88706   7 
  13  -7  -2 101.629 7.35515   1 
 -13   7   2 114.040 7.91362   1 
 -13   7   2 116.073 5.94433   4 
  12  -7  -2 26.7751 3.48399   7 
  12  -7  -2 30.8619 4.40959   1 
 -12   7   2 29.8391 4.56834   1 
 -12   7   2 31.2677 3.62508   4 
  11  -7  -2 74.2349 3.72118   6 
  11  -7  -2 63.2845 4.82530   7 
  11  -7  -2 69.2528 5.75294   1 
 -11   7   2 55.9028 5.49319   1 
  10  -7  -2 29.4836 2.81823   6 
  10  -7  -2 24.7655 3.65409   1 
  10  -7  -2 23.8300 2.96926   7 
 -10   7   2 16.4846 3.31544   1 
   9  -7  -2 13.1733 2.84965   1 
   9  -7  -2 19.4340 2.44941   6 
   9  -7  -2 22.3613 2.70362   7 
  -9   7   2 25.6827 3.70144   1 
   8  -7  -2 1.66903 1.39393   2 
   8  -7  -2 4.48339 1.69655   6 
   8  -7  -2 2.19397 1.46848   7 
   8  -7  -2 -0.3473 1.81729   1 
  -8   7   2 0.57330 1.98574   1 
   7  -7  -2 0.68919 1.37405   7 
   7  -7  -2 1.03312 1.78389   1 
   7  -7  -2 -0.1783 1.27033   2 
  -7   7   2 1.07096 1.83819   1 
   6  -7  -2 100.093 5.40803   1 
   6  -7  -2 88.8916 4.35045   7 
  -6   7   2 99.4627 5.17199   5 
  -6   7   2 98.2646 4.30547   7 
  -6   7   2 98.9666 5.43072   1 
   5  -7  -2 267.469 10.0002   1 
   5  -7  -2 288.222 9.25258   7 
  -5   7   2 284.952 10.0758   5 
  -5   7   2 276.416 10.1191   1 
  -5   7   2 292.279 9.20367   7 
   4  -7  -2 5.99961 1.90475   5 
   4  -7  -2 7.34401 1.58731   7 
   4  -7  -2 6.42751 1.95098   1 
  -4   7   2 5.62659 1.85791   1 
  -4   7   2 8.23956 1.99122   5 
  -4   7   2 6.51215 1.54618   7 
   3  -7  -2 172.560 7.51207   5 
   3  -7  -2 170.418 7.04178   1 
  -3   7   2 165.188 7.00132   1 
  -3   7   2 170.987 6.21750   7 
  -3   7   2 167.343 7.04525   5 
  -3   7   2 175.945 6.65079   2 
   2  -7  -2 42.4212 3.85017   1 
  -2   7   2 35.6499 3.38893   5 
  -2   7   2 36.8021 2.86542   7 
  -2   7   2 43.2105 3.63315   1 
  -2   7   2 28.1893 2.70193   2 
  -2   7   2 41.3071 3.32710   2 
   1  -7  -2 381.698 12.6645   1 
  -1   7   2 353.527 11.9782   2 
  -1   7   2 367.371 12.4190   1 
  -1   7   2 401.076 12.1882   2 
  -1   7   2 357.974 11.5502   7 
  -1   7   2 377.062 12.6446   5 
   0  -7  -2 163.849 7.07146   1 
   0  -7  -2 168.661 7.20304   6 
   0   7   2 155.617 6.74225   1 
   0   7   2 153.970 6.97801   5 
   0   7   2 151.556 6.00191   7 
   0   7   2 141.783 6.24642   2 
   0   7   2 157.203 6.42523   2 
  -1  -7  -2 140.727 6.88677   6 
  -1  -7  -2 158.736 7.19227   1 
   1   7   2 158.910 6.61583   2 
   1   7   2 156.963 6.18961   7 
   1   7   2 160.546 6.60927   2 
   1   7   2 159.524 7.03904   1 
   1   7   2 155.766 7.18485   5 
  -2  -7  -2 6.94097 2.38171   1 
  -2  -7  -2 8.15138 2.66672   6 
   2   7   2 9.84061 2.41142   1 
   2   7   2 8.03200 1.98020   2 
   2   7   2 7.80967 1.94628   2 
   2   7   2 12.4630 2.76107   5 
   2   7   2 8.98169 1.93417   7 
   2   7   2 8.98987 2.13156   2 
   2   7   2 5.97008 1.84471   7 
  -3  -7  -2 474.568 15.4564   6 
  -3  -7  -2 453.345 15.5196   1 
   3   7   2 476.438 14.4364   7 
   3   7   2 436.438 15.1780   1 
   3   7   2 422.540 14.6135   2 
   3   7   2 456.639 14.3356   7 
   3   7   2 462.736 15.7595   5 
   3   7   2 437.136 14.8194   2 
  -4  -7  -2 10.8263 2.85999   6 
  -4  -7  -2 10.1458 2.99631   1 
   4   7   2 11.7061 2.86607   1 
   4   7   2 11.4453 2.37051   2 
   4   7   2 9.63930 2.39315   2 
   4   7   2 11.7368 3.10030   5 
   4   7   2 15.8788 2.73212   7 
  -5  -7  -2 207.494 9.60709   1 
  -5  -7  -2 213.552 9.06075   6 
   5   7   2 193.387 9.59946   5 
   5   7   2 198.084 8.43571   7 
   5   7   2 213.499 9.15891   2 
   5   7   2 216.044 9.33356   1 
  -6  -7  -2 10.4240 3.31251   1 
  -6  -7  -2 27.3399 3.87942   6 
   6   7   2 18.2256 3.24270   7 
   6   7   2 17.7004 4.16884   5 
  -7  -7  -2 99.9795 6.11931   6 
  -7  -7  -2 96.7299 7.11612   1 
   7   7   2 107.859 6.53364   7 
   7   7   2 104.307 7.45063   5 
  -8  -7  -2 2.74256 3.60632   1 
  -8  -7  -2 6.66457 3.68153   1 
   8   7   2 3.31189 3.37982   5 
   8   7   2 4.33006 3.16948   7 
  -9  -7  -2 97.1612 8.34151   1 
  -9  -7  -2 94.7788 8.46185   1 
   9   7   2 112.643 7.94636   7 
 -10  -7  -2 8.49723 4.43935   1 
  10   7   2 10.3324 4.15605   7 
 -11  -7  -2 76.6146 8.39084   1 
  11   7   2 67.0576 7.17681   7 
 -12  -7  -2 6.82171 5.14589   1 
  12   7   2 15.6829 5.13910   7 
 -19   8   2 3.70510 5.56545   1 
 -18   8   2 39.7443 7.25139   1 
 -17   8   2 4.52077 4.80775   1 
 -16   8   2 1.63547 4.10175   1 
  15  -8  -2 25.3515 4.39257   7 
 -15   8   2 24.7605 5.15556   1 
  14  -8  -2 -2.0916 2.73642   1 
  14  -8  -2 1.65913 2.95379   7 
 -14   8   2 0.46181 3.61017   1 
  13  -8  -2 16.6121 3.39520   7 
  13  -8  -2 8.43781 3.33915   1 
 -13   8   2 11.7607 2.84822   4 
 -13   8   2 7.39464 3.45629   1 
  12  -8  -2 -1.5538 2.18140   7 
  12  -8  -2 -1.3970 2.50730   1 
 -12   8   2 0.37934 3.05489   1 
  11  -8  -2 35.4349 4.56835   1 
  11  -8  -2 39.7429 4.07506   7 
  11  -8  -2 43.5030 3.54397   6 
 -11   8   2 37.1434 4.72940   1 
  10  -8  -2 1.57752 1.65507   6 
  10  -8  -2 5.02132 2.56238   1 
  10  -8  -2 3.91200 1.98879   7 
 -10   8   2 4.24399 2.84575   1 
   9  -8  -2 0.59143 2.09613   1 
   9  -8  -2 0.95245 1.60764   6 
   9  -8  -2 1.53093 1.59494   7 
  -9   8   2 -0.7549 2.11481   1 
   8  -8  -2 56.1674 4.40083   6 
   8  -8  -2 55.4480 4.02861   7 
   8  -8  -2 48.3959 4.60731   1 
  -8   8   2 67.2278 5.40457   1 
   7  -8  -2 20.2209 2.77170   6 
   7  -8  -2 20.2522 3.21915   1 
   7  -8  -2 20.8425 2.54497   7 
  -7   8   2 18.7388 3.11520   1 
  -7   8   2 21.9977 2.53124   7 
   6  -8  -2 12.8937 2.08060   7 
   6  -8  -2 7.12372 2.37644   1 
  -6   8   2 5.62869 2.14723   5 
  -6   8   2 17.5418 2.92845   1 
  -6   8   2 8.34133 1.76411   7 
   5  -8  -2 49.2374 3.21259   7 
   5  -8  -2 45.3163 4.17958   1 
  -5   8   2 44.7707 3.37443   7 
  -5   8   2 53.5088 4.51728   1 
  -5   8   2 47.6209 4.10836   5 
   4  -8  -2 295.456 10.6817   1 
  -4   8   2 282.945 10.0455   2 
  -4   8   2 289.673 10.5954   5 
  -4   8   2 288.176 10.6369   1 
  -4   8   2 294.221 9.67383   7 
   3  -8  -2 32.7080 3.58886   1 
  -3   8   2 24.6714 3.15963   5 
  -3   8   2 30.2219 2.86494   7 
  -3   8   2 35.6888 3.31509   2 
  -3   8   2 23.9131 3.28279   1 
  -3   8   2 28.1314 2.84536   2 
   2  -8  -2 181.181 7.86321   1 
  -2   8   2 201.390 8.11408   5 
  -2   8   2 179.771 7.35686   2 
  -2   8   2 177.233 7.28335   2 
  -2   8   2 183.893 7.02584   7 
  -2   8   2 199.316 8.05400   1 
   1  -8  -2 61.7104 4.86887   1 
   1  -8  -2 52.0428 4.73710   6 
  -1   8   2 68.9293 3.89440   7 
  -1   8   2 63.6313 4.52009   5 
  -1   8   2 64.4142 4.12568   2 
  -1   8   2 60.4605 4.31139   1 
  -1   8   2 69.0913 4.18437   2 
   0  -8  -2 14.1215 2.78998   1 
   0  -8  -2 5.27596 2.35260   6 
   0   8   2 11.9249 2.10620   2 
   0   8   2 11.2223 2.57521   1 
   0   8   2 10.1324 2.05105   7 
   0   8   2 7.71466 2.67371   5 
   0   8   2 10.7404 2.08104   2 
  -1  -8  -2 444.159 15.4719   1 
  -1  -8  -2 477.270 15.8896   6 
   1   8   2 450.537 14.4558   7 
   1   8   2 459.755 15.4562   1 
   1   8   2 445.344 14.9578   2 
   1   8   2 476.167 15.8679   5 
   1   8   2 469.816 15.0633   2 
  -2  -8  -2 21.5853 3.47098   1 
  -2  -8  -2 19.2801 3.39607   6 
   2   8   2 10.5042 2.27727   7 
   2   8   2 21.5872 2.87439   2 
   2   8   2 25.4009 3.71737   5 
   2   8   2 23.3597 3.05215   2 
   2   8   2 26.5001 3.26748   2 
   2   8   2 16.2867 3.13079   1 
  -3  -8  -2 487.780 17.2755   1 
  -3  -8  -2 506.418 17.2676   6 
   3   8   2 519.827 17.9070   2 
   3   8   2 512.440 16.1531   7 
   3   8   2 512.539 17.1579   1 
   3   8   2 476.780 18.5528   2 
   3   8   2 514.908 16.1858   7 
   3   8   2 510.173 17.6256   5 
   3   8   2 501.500 16.7244   2 
  -4  -8  -2 156.835 8.28324   1 
  -4  -8  -2 164.810 8.10623   6 
   4   8   2 139.399 7.39024   2 
   4   8   2 147.907 7.08168   7 
   4   8   2 138.394 8.05743   5 
   4   8   2 153.676 7.82558   1 
   4   8   2 150.096 7.14965   7 
  -5  -8  -2 100.944 6.65649   6 
  -5  -8  -2 110.803 7.19772   1 
   5   8   2 109.049 6.29739   7 
   5   8   2 118.417 6.46227   7 
   5   8   2 110.617 7.30130   5 
  -6  -8  -2 2.75612 2.91699   6 
  -6  -8  -2 3.38980 3.01315   1 
   6   8   2 0.48191 3.01251   5 
   6   8   2 3.88355 2.70476   7 
  -7  -8  -2 75.0768 7.06041   1 
   7   8   2 55.2765 5.43493   7 
   7   8   2 64.0065 6.68554   5 
  -8  -8  -2 12.0220 4.23733   1 
  -8  -8  -2 11.1646 4.43769   1 
   8   8   2 8.16485 3.59301   7 
  -9  -8  -2 72.4575 7.65650   1 
  -9  -8  -2 70.7199 7.60312   1 
   9   8   2 88.5789 7.27052   7 
 -10  -8  -2 45.5494 6.81012   1 
  10   8   2 32.9166 5.78399   7 
 -11  -8  -2 38.5557 6.49395   1 
  11   8   2 26.9080 5.70598   7 
 -19   9   2 -0.4316 5.10325   1 
 -18   9   2 18.6904 5.99948   1 
 -17   9   2 0.90942 4.55005   1 
 -16   9   2 32.6975 6.26965   1 
 -15   9   2 2.51535 3.95586   1 
  14  -9  -2 6.75047 3.46417   1 
 -14   9   2 1.36968 3.73334   1 
  13  -9  -2 -0.0079 3.01696   1 
  13  -9  -2 -3.6961 2.14942   7 
 -13   9   2 -2.0146 3.28196   1 
  12  -9  -2 27.4534 3.81662   7 
  12  -9  -2 37.3758 4.13207   6 
  12  -9  -2 30.1877 4.59861   1 
 -12   9   2 38.8113 5.33969   1 
  11  -9  -2 2.20068 2.12867   7 
  11  -9  -2 4.03989 2.81121   1 
  11  -9  -2 -0.9770 1.63369   6 
 -11   9   2 1.42798 2.91227   1 
  10  -9  -2 41.4435 3.99891   6 
  10  -9  -2 43.4274 4.94205   1 
  10  -9  -2 46.5817 4.23350   7 
 -10   9   2 39.9420 4.83833   1 
   9  -9  -2 -0.0066 1.96642   6 
   9  -9  -2 3.88456 1.85373   7 
   9  -9  -2 -0.9194 2.15202   1 
  -9   9   2 2.34860 2.54008   1 
   8  -9  -2 46.2457 4.75076   1 
   8  -9  -2 52.1106 4.58379   6 
   8  -9  -2 45.9872 3.83349   7 
  -8   9   2 37.9715 4.39405   1 
   7  -9  -2 74.6620 5.26664   1 
   7  -9  -2 75.1158 4.94131   6 
   7  -9  -2 78.3625 4.33546   7 
  -7   9   2 83.1223 5.64873   1 
  -7   9   2 72.8953 5.13487   5 
  -7   9   2 72.0418 4.22034   7 
   6  -9  -2 31.8350 3.81288   6 
   6  -9  -2 31.4152 2.95459   7 
   6  -9  -2 28.4190 3.72183   1 
  -6   9   2 27.1549 3.53113   5 
  -6   9   2 30.9235 3.75493   1 
  -6   9   2 29.7952 3.01096   7 
   5  -9  -2 6.20940 2.33492   6 
   5  -9  -2 4.05947 2.25805   1 
  -5   9   2 4.28494 2.26429   1 
  -5   9   2 3.55979 2.14269   5 
  -5   9   2 2.20735 1.60253   7 
   4  -9  -2 81.7980 5.28619   1 
   4  -9  -2 72.3597 5.14810   6 
  -4   9   2 79.1601 4.33002   7 
  -4   9   2 91.7015 5.35864   5 
  -4   9   2 79.7117 5.38049   1 
  -4   9   2 71.4514 4.54208   2 
   3  -9  -2 217.172 9.27303   1 
   3  -9  -2 215.132 9.34580   6 
  -3   9   2 218.373 8.58222   2 
  -3   9   2 222.019 8.17970   7 
  -3   9   2 223.045 9.21949   5 
  -3   9   2 218.807 8.55499   2 
  -3   9   2 227.852 9.21168   1 
   2  -9  -2 54.7049 4.96154   6 
   2  -9  -2 62.5370 5.30546   1 
  -2   9   2 58.8597 3.92924   7 
  -2   9   2 53.3130 4.02053   2 
  -2   9   2 60.5243 5.09721   1 
  -2   9   2 48.2142 4.01888   2 
  -2   9   2 57.3263 4.96835   5 
   1  -9  -2 219.055 9.25093   1 
   1  -9  -2 221.673 9.65254   6 
  -1   9   2 199.415 8.03600   7 
  -1   9   2 223.083 9.45717   5 
  -1   9   2 203.771 8.91416   1 
  -1   9   2 217.249 8.64471   2 
  -1   9   2 217.706 8.72055   2 
   0  -9  -2 22.3294 3.70464   6 
   0  -9  -2 25.5137 3.72673   1 
   0   9   2 18.9169 2.83956   2 
   0   9   2 20.3070 3.06285   2 
   0   9   2 23.6769 3.61672   5 
   0   9   2 25.4458 3.47975   1 
   0   9   2 25.7056 3.16356   7 
  -1  -9  -2 461.980 16.5810   6 
  -1  -9  -2 469.233 16.4330   1 
   1   9   2 483.741 16.7389   5 
   1   9   2 491.414 15.3005   7 
   1   9   2 453.511 15.6802   2 
   1   9   2 484.188 16.2666   1 
  -2  -9  -2 47.9648 5.14158   6 
  -2  -9  -2 43.0353 4.88775   1 
   2   9   2 32.6566 3.73425   2 
   2   9   2 55.3224 5.19761   1 
   2   9   2 36.5453 3.81424   7 
   2   9   2 37.7064 4.71318   5 
  -3  -9  -2 302.959 12.3796   6 
  -3  -9  -2 301.449 12.5045   1 
   3   9   2 286.743 12.4098   5 
   3   9   2 300.885 12.1185   1 
   3   9   2 299.297 11.1332   7 
  -4  -9  -2 -0.9456 2.89197   1 
  -4  -9  -2 -2.0345 2.28317   6 
   4   9   2 1.54956 3.05428   5 
   4   9   2 -1.4329 2.14344   7 
  -5  -9  -2 141.982 8.23160   6 
  -5  -9  -2 152.387 8.76302   1 
   5   9   2 126.840 8.41862   5 
   5   9   2 147.568 7.69879   7 
   5   9   2 138.622 7.63038   7 
  -6  -9  -2 21.7758 4.59993   1 
  -6  -9  -2 26.3377 4.51298   6 
   6   9   2 23.3663 4.06977   7 
   6   9   2 22.6566 4.59472   5 
   6   9   2 32.4361 4.43342   7 
  -7  -9  -2 72.3269 7.26577   1 
   7   9   2 61.0639 5.99757   7 
   7   9   2 60.2185 6.02587   7 
  -8  -9  -2 38.2082 5.96941   1 
  -8  -9  -2 30.6552 5.72377   1 
   8   9   2 26.2423 4.84535   7 
   8   9   2 33.7819 5.26239   7 
  -9  -9  -2 47.3415 6.60791   1 
  -9  -9  -2 44.3184 6.58483   1 
   9   9   2 40.6426 6.25456   7 
   9   9   2 38.6462 5.71088   7 
 -10  -9  -2 85.1183 8.80159   1 
  10   9   2 50.2550 6.63035   7 
  10   9   2 66.7429 7.22917   7 
 -19  10   2 18.9123 6.63186   1 
 -18  10   2 10.4243 5.68572   1 
 -17  10   2 4.98834 5.00019   1 
 -16  10   2 0.36763 4.41494   1 
  15 -10  -2 10.0063 4.07891   1 
 -15  10   2 23.6056 5.41391   1 
  14 -10  -2 2.32498 3.43421   1 
 -14  10   2 2.30412 3.74563   1 
  13 -10  -2 1.66368 3.28611   1 
 -13  10   2 4.08681 3.68027   1 
  12 -10  -2 48.9234 4.37415   6 
  12 -10  -2 49.3247 5.66351   1 
 -12  10   2 45.7870 5.78442   1 
  11 -10  -2 5.96835 2.60745   6 
  11 -10  -2 10.5824 3.46123   1 
 -11  10   2 8.83358 3.60197   1 
  10 -10  -2 261.829 11.4712   1 
  10 -10  -2 253.086 10.2996   6 
 -10  10   2 263.375 11.6381   1 
   9 -10  -2 2.71835 2.80133   1 
   9 -10  -2 4.01729 2.54635   6 
  -9  10   2 5.20111 2.92029   1 
   8 -10  -2 301.307 11.5917   6 
   8 -10  -2 293.382 11.9274   1 
  -8  10   2 295.816 12.1410   1 
   7 -10  -2 2.49431 2.57837   6 
   7 -10  -2 -0.9919 2.30962   1 
  -7  10   2 -2.7763 1.56550   7 
  -7  10   2 -1.1407 2.15184   1 
  -7  10   2 1.85771 2.40478   5 
   6 -10  -2 141.540 7.44832   6 
   6 -10  -2 139.479 7.43635   1 
  -6  10   2 144.666 7.56614   1 
  -6  10   2 147.078 7.52022   5 
  -6  10   2 136.501 6.24371   7 
   5 -10  -2 193.798 9.17045   6 
   5 -10  -2 197.301 9.10456   1 
  -5  10   2 208.363 8.04390   7 
  -5  10   2 201.777 9.05463   5 
  -5  10   2 214.957 9.25988   1 
   4 -10  -2 122.660 7.04943   6 
   4 -10  -2 121.843 7.04032   1 
  -4  10   2 120.466 6.95976   1 
  -4  10   2 132.855 5.96176   7 
  -4  10   2 121.734 6.83795   5 
   3 -10  -2 461.696 16.5893   6 
   3 -10  -2 469.337 16.3115   1 
  -3  10   2 472.278 16.2890   5 
  -3  10   2 457.165 14.9471   7 
  -3  10   2 486.031 16.2618   1 
   2 -10  -2 100.743 6.62943   6 
   2 -10  -2 104.260 6.61963   1 
  -2  10   2 102.343 5.41362   7 
  -2  10   2 113.229 6.52942   1 
  -2  10   2 100.078 6.39199   5 
   1 -10  -2 209.700 9.84352   6 
   1 -10  -2 193.279 9.53429   1 
  -1  10   2 214.767 8.46316   7 
  -1  10   2 207.714 9.56367   5 
  -1  10   2 216.865 9.38377   1 
   0 -10  -2 3.21203 2.84477   6 
   0 -10  -2 -0.4191 2.33149   1 
   0  10   2 0.20022 2.19043   1 
   0  10   2 1.75126 2.78310   5 
   0  10   2 2.13531 2.12715   7 
  -1 -10  -2 420.439 15.7199   6 
  -1 -10  -2 394.071 15.2928   1 
   1  10   2 409.664 15.0259   1 
   1  10   2 431.984 14.2732   7 
   1  10   2 422.152 15.6786   5 
  -2 -10  -2 16.9271 3.96896   6 
  -2 -10  -2 22.7737 4.16693   1 
   2  10   2 24.2539 3.65417   7 
   2  10   2 15.0143 3.78595   5 
   2  10   2 18.5891 3.81329   1 
  -3 -10  -2 198.938 10.3947   6 
  -3 -10  -2 237.055 10.9948   1 
   3  10   2 209.534 9.39115   7 
   3  10   2 228.427 11.1062   5 
  -4 -10  -2 2.19457 3.38549   1 
  -4 -10  -2 0.40464 3.40600   6 
   4  10   2 1.79699 2.75275   7 
   4  10   2 3.20028 3.58434   5 
  -5 -10  -2 109.506 8.76317   1 
  -5 -10  -2 107.986 7.88502   6 
   5  10   2 121.618 7.42224   7 
  -6 -10  -2 41.0193 6.03460   1 
  -6 -10  -2 30.9906 5.29308   6 
   6  10   2 27.4299 4.58190   7 
  -7 -10  -2 60.6923 7.05569   1 
   7  10   2 51.0471 6.06947   7 
  -8 -10  -2 31.5367 5.99032   1 
  -8 -10  -2 25.8596 5.99001   1 
   8  10   2 24.1590 5.14020   7 
  -9 -10  -2 -4.5847 4.07871   1 
  -9 -10  -2 2.61699 4.55609   1 
   9  10   2 3.40678 4.12723   7 
 -19  11   2 2.28647 5.65013   1 
 -18  11   2 -1.9647 5.12358   1 
 -17  11   2 5.00672 5.07260   1 
 -16  11   2 -2.7110 4.20257   1 
  15 -11  -2 28.3876 5.71062   1 
 -15  11   2 29.5438 6.02421   1 
  14 -11  -2 -3.2617 3.27440   1 
 -14  11   2 -0.2065 3.68270   1 
  13 -11  -2 0.00556 3.45663   1 
 -13  11   2 0.41861 3.60813   1 
  12 -11  -2 163.085 7.94654   6 
  12 -11  -2 160.546 9.51863   1 
 -12  11   2 154.145 9.71049   1 
  11 -11  -2 8.86036 3.60066   1 
  11 -11  -2 0.03726 2.42731   6 
 -11  11   2 -2.1276 2.87954   1 
  10 -11  -2 356.701 14.5070   1 
  10 -11  -2 353.561 13.3620   6 
 -10  11   2 362.005 14.6279   1 
   9 -11  -2 50.1417 5.28724   6 
   9 -11  -2 42.0949 5.33497   1 
  -9  11   2 47.2196 5.51443   1 
   8 -11  -2 349.453 13.6914   6 
   8 -11  -2 358.676 14.1128   1 
  -8  11   2 363.425 14.1817   1 
   7 -11  -2 167.939 8.46898   1 
   7 -11  -2 145.398 8.02970   6 
  -7  11   2 146.844 8.19192   1 
  -7  11   2 156.152 8.18501   5 
   6 -11  -2 436.960 15.8613   1 
   6 -11  -2 435.084 15.9337   6 
  -6  11   2 426.730 15.8365   1 
  -6  11   2 435.045 14.3118   7 
  -6  11   2 429.515 15.6874   5 
   5 -11  -2 13.8018 3.44786   6 
   5 -11  -2 20.0978 3.94479   1 
  -5  11   2 11.8150 3.19687   5 
  -5  11   2 16.9201 3.53260   1 
  -5  11   2 21.7563 3.12299   7 
   4 -11  -2 22.1791 4.11066   6 
   4 -11  -2 21.9040 4.06508   1 
  -4  11   2 27.0772 4.02140   5 
  -4  11   2 21.1510 3.15110   7 
  -4  11   2 20.7380 3.74803   1 
   3 -11  -2 291.430 12.4537   6 
   3 -11  -2 296.252 12.2621   1 
  -3  11   2 304.581 12.2062   1 
  -3  11   2 298.247 12.0807   5 
  -3  11   2 278.588 10.7161   7 
   2 -11  -2 12.9491 3.54105   1 
   2 -11  -2 8.55443 3.42163   6 
  -2  11   2 17.8828 3.73006   1 
  -2  11   2 9.91056 3.14308   5 
  -2  11   2 11.0806 2.69416   7 
   1 -11  -2 340.873 13.6239   1 
   1 -11  -2 325.904 13.7793   6 
  -1  11   2 345.622 13.6511   5 
  -1  11   2 331.192 12.1830   7 
  -1  11   2 340.025 13.2663   1 
   0 -11  -2 5.78803 3.11684   1 
   0 -11  -2 -0.8311 2.88951   6 
   0  11   2 2.58992 2.84171   5 
   0  11   2 6.96195 2.97477   1 
   0  11   2 5.89823 2.50686   7 
  -1 -11  -2 174.738 9.61563   6 
  -1 -11  -2 187.433 9.77251   1 
   1  11   2 186.048 9.40006   1 
   1  11   2 172.818 8.33634   7 
   1  11   2 190.483 10.0589   5 
  -2 -11  -2 12.5670 3.97279   6 
  -2 -11  -2 10.4041 3.62202   1 
   2  11   2 4.17446 3.31989   5 
   2  11   2 6.04768 2.95221   7 
  -3 -11  -2 54.1956 6.22665   6 
  -3 -11  -2 60.5427 6.46640   1 
   3  11   2 58.0922 5.55103   7 
   3  11   2 51.2009 6.31309   5 
  -4 -11  -2 49.5405 6.33499   6 
  -4 -11  -2 50.3020 6.26171   1 
   4  11   2 44.8909 5.33585   7 
  -5 -11  -2 68.6999 7.13592   6 
  -5 -11  -2 63.0837 7.01456   1 
   5  11   2 67.2726 6.40209   7 
  -6 -11  -2 45.9005 6.83100   1 
   6  11   2 52.4494 5.97515   7 
  -7 -11  -2 2.91341 4.05987   1 
   7  11   2 3.86765 3.99005   7 
  -8 -11  -2 24.6645 5.84714   1 
  -8 -11  -2 30.6273 6.40928   1 
   8  11   2 14.3437 4.80732   7 
 -18  12   2 10.0786 6.12411   1 
 -17  12   2 -1.1386 4.65732   1 
 -16  12   2 -6.9819 4.03232   1 
  15 -12  -2 18.2511 5.24858   1 
 -15  12   2 10.5332 4.79291   1 
  14 -12  -2 31.5030 5.60761   1 
 -14  12   2 29.5660 6.07052   1 
  13 -12  -2 20.5054 4.91834   1 
  13 -12  -2 12.0137 5.35123   6 
 -13  12   2 16.3253 4.84145   1 
  12 -12  -2 210.308 9.92400   6 
  12 -12  -2 200.662 11.2442   1 
 -12  12   2 234.669 11.9066   1 
  11 -12  -2 3.91101 3.62664   1 
  11 -12  -2 1.30521 2.65783   6 
 -11  12   2 7.71931 3.86099   1 
  10 -12  -2 168.944 9.54735   1 
  10 -12  -2 147.795 8.21238   6 
 -10  12   2 157.375 9.20733   1 
   9 -12  -2 -0.2749 3.30069   1 
   9 -12  -2 -0.8960 3.16881   6 
  -9  12   2 2.88660 3.23359   1 
   8 -12  -2 61.8313 6.12863   6 
   8 -12  -2 51.0469 5.83933   1 
  -8  12   2 61.9749 6.01620   5 
  -8  12   2 69.0415 6.47007   1 
   7 -12  -2 49.0039 5.56416   1 
   7 -12  -2 41.7917 5.23637   6 
  -7  12   2 43.2623 5.44314   1 
  -7  12   2 52.9015 5.66371   5 
   6 -12  -2 77.1688 6.84227   6 
   6 -12  -2 73.6018 6.86586   1 
  -6  12   2 97.4427 7.66895   1 
  -6  12   2 79.3354 6.76941   5 
   5 -12  -2 83.9873 7.14633   1 
   5 -12  -2 88.9093 7.39269   6 
  -5  12   2 86.2199 7.09265   1 
  -5  12   2 87.2105 5.55407   7 
  -5  12   2 75.1231 6.61023   5 
   4 -12  -2 -0.0751 2.74953   1 
   4 -12  -2 4.39181 3.35562   6 
  -4  12   2 0.72309 2.23684   7 
  -4  12   2 3.94944 3.18191   5 
  -4  12   2 2.81041 2.82687   1 
   3 -12  -2 179.940 9.46019   1 
   3 -12  -2 155.838 9.08904   6 
  -3  12   2 150.279 7.53388   7 
  -3  12   2 150.746 8.60881   5 
  -3  12   2 156.877 8.68382   1 
   2 -12  -2 13.3927 4.13948   6 
   2 -12  -2 20.2120 4.21795   1 
  -2  12   2 21.3068 3.50269   7 
  -2  12   2 30.7397 4.64940   5 
  -2  12   2 21.2145 4.01660   1 
   1 -12  -2 242.261 11.3973   1 
   1 -12  -2 234.235 11.7173   6 
  -1  12   2 247.300 11.5766   5 
  -1  12   2 249.209 10.2871   7 
  -1  12   2 258.009 11.4100   1 
   0 -12  -2 2.56361 3.53048   6 
   0 -12  -2 -2.6023 2.86406   1 
   0  12   2 -1.5362 2.79747   5 
   0  12   2 5.80737 3.00463   7 
  -1 -12  -2 65.8301 7.00602   6 
  -1 -12  -2 65.8785 6.78580   1 
   1  12   2 67.6027 6.86816   5 
   1  12   2 73.5624 6.19340   7 
  -2 -12  -2 15.5136 4.50228   6 
  -2 -12  -2 13.4501 4.30874   1 
   2  12   2 14.4119 3.68516   7 
  -3 -12  -2 91.7836 8.16987   1 
  -3 -12  -2 76.5913 7.81993   6 
   3  12   2 65.6136 6.28789   7 
  -4 -12  -2 72.9144 7.80707   1 
  -4 -12  -2 81.4980 8.06616   6 
   4  12   2 67.2113 6.57216   7 
  -5 -12  -2 39.3699 6.35049   6 
  -5 -12  -2 48.7892 6.67941   1 
   5  12   2 35.4935 5.49238   7 
  -6 -12  -2 9.63365 4.85316   1 
   6  12   2 13.5238 4.48170   7 
  -7 -12  -2 1.76812 4.62551   1 
   7  12   2 0.63709 4.69054   7 
 -18  13   2 14.5780 6.04727   1 
 -17  13   2 -1.1009 4.67449   1 
 -16  13   2 50.7639 7.53969   1 
  15 -13  -2 4.83974 4.39880   1 
 -15  13   2 4.49937 4.77885   1 
  14 -13  -2 114.119 9.62664   1 
 -14  13   2 93.7670 9.12215   1 
  13 -13  -2 -0.3592 3.69248   1 
  13 -13  -2 -3.4072 3.02462   6 
 -13  13   2 3.72683 4.24288   1 
  12 -13  -2 157.449 8.74035   6 
  12 -13  -2 162.593 10.4098   1 
 -12  13   2 167.279 10.6462   1 
  11 -13  -2 3.54104 3.52948   6 
  11 -13  -2 -0.8826 3.59816   1 
 -11  13   2 1.52454 3.71985   1 
  10 -13  -2 178.155 9.81090   6 
  10 -13  -2 193.992 10.4416   1 
 -10  13   2 174.493 10.1440   1 
   9 -13  -2 71.6790 7.07706   1 
   9 -13  -2 66.5672 6.82264   6 
  -9  13   2 82.8493 7.58541   1 
   8 -13  -2 16.8204 4.09655   6 
   8 -13  -2 13.6934 4.16660   1 
  -8  13   2 13.3904 4.07458   1 
  -8  13   2 16.6243 4.10273   5 
   7 -13  -2 126.726 8.82625   1 
   7 -13  -2 141.568 8.75373   6 
  -7  13   2 159.744 9.01776   5 
  -7  13   2 139.778 8.85735   1 
   6 -13  -2 92.3304 7.98792   1 
   6 -13  -2 92.1351 8.10640   6 
  -6  13   2 74.7597 7.01325   1 
  -6  13   2 89.9274 7.74402   5 
   5 -13  -2 138.682 8.76621   1 
   5 -13  -2 132.427 8.65093   6 
  -5  13   2 132.728 8.27940   5 
  -5  13   2 132.644 8.48347   1 
   4 -13  -2 14.8098 4.72158   6 
   4 -13  -2 12.7378 4.16049   1 
  -4  13   2 10.0822 3.54019   5 
  -4  13   2 14.4527 3.99289   1 
  -4  13   2 15.8219 3.30725   7 
   3 -13  -2 67.6527 6.85677   1 
   3 -13  -2 57.6636 6.76912   6 
  -3  13   2 65.4239 6.70181   5 
  -3  13   2 58.0301 5.33233   7 
  -3  13   2 72.5828 6.63683   1 
   2 -13  -2 8.32364 4.02516   1 
   2 -13  -2 6.92953 3.91389   6 
  -2  13   2 9.61440 3.61104   5 
  -2  13   2 7.48801 3.00620   7 
  -2  13   2 11.3275 3.76501   1 
   1 -13  -2 245.038 12.6306   6 
   1 -13  -2 273.796 12.7144   1 
  -1  13   2 257.806 11.0048   7 
  -1  13   2 257.097 12.4085   5 
   0 -13  -2 6.55413 3.92117   1 
   0 -13  -2 4.82086 4.11356   6 
   0  13   2 -0.6007 2.93366   7 
  -1 -13  -2 110.181 9.40840   6 
  -1 -13  -2 124.228 9.02914   1 
   1  13   2 126.575 7.96981   7 
  -2 -13  -2 10.2188 4.66614   6 
  -2 -13  -2 10.7211 4.83830   1 
   2  13   2 9.57025 3.68733   7 
  -3 -13  -2 93.2910 8.94247   6 
  -3 -13  -2 77.6089 7.93320   1 
   3  13   2 79.6024 7.24846   7 
  -4 -13  -2 -0.7678 4.20254   1 
  -4 -13  -2 13.5012 5.36631   6 
   4  13   2 -5.1858 3.41516   7 
  -5 -13  -2 15.9371 5.60761   6 
  -5 -13  -2 13.1134 5.20536   1 
   5  13   2 3.98903 4.47577   7 
  -6 -13  -2 3.28895 4.80586   1 
 -18  14   2 8.84395 5.99805   1 
 -17  14   2 0.62525 5.30101   1 
  16 -14  -2 50.5614 7.99939   1 
 -16  14   2 50.8981 7.82356   1 
  15 -14  -2 11.4194 5.39595   1 
 -15  14   2 6.37751 5.08510   1 
  14 -14  -2 74.3376 8.41100   1 
 -14  14   2 75.1422 8.70791   1 
  13 -14  -2 14.0488 5.00212   1 
  13 -14  -2 15.4363 4.40834   6 
 -13  14   2 11.7541 4.84865   1 
  12 -14  -2 67.9910 7.06676   6 
  12 -14  -2 75.1226 7.89368   1 
 -12  14   2 82.0921 8.32763   1 
  11 -14  -2 32.3569 6.07129   1 
  11 -14  -2 34.0479 5.33766   6 
 -11  14   2 37.7860 6.24117   1 
  10 -14  -2 68.4275 7.74218   1 
  10 -14  -2 69.1762 7.20105   6 
 -10  14   2 64.0600 7.22055   1 
   9 -14  -2 42.7538 6.44618   1 
   9 -14  -2 44.8463 6.05738   6 
  -9  14   2 43.2481 6.32828   1 
   8 -14  -2 135.386 8.97045   6 
   8 -14  -2 137.658 9.23377   1 
  -8  14   2 138.431 9.05759   1 
  -8  14   2 125.333 8.58162   5 
   7 -14  -2 3.23813 3.86371   1 
   7 -14  -2 -2.3530 3.44875   6 
  -7  14   2 0.79429 3.33574   5 
  -7  14   2 0.34145 3.27279   1 
   6 -14  -2 5.96094 3.87919   1 
   6 -14  -2 2.88995 3.78301   6 
  -6  14   2 1.67947 3.80501   5 
  -6  14   2 -1.5408 3.27924   1 
   5 -14  -2 56.2151 6.64860   1 
   5 -14  -2 65.3388 7.32148   6 
  -5  14   2 64.2532 6.92148   1 
  -5  14   2 55.6919 6.33245   5 
   4 -14  -2 3.78755 4.06907   6 
   4 -14  -2 4.10020 3.81794   1 
  -4  14   2 7.09385 3.56124   1 
  -4  14   2 8.54901 3.91791   5 
   3 -14  -2 120.428 9.99672   6 
   3 -14  -2 124.664 8.84280   1 
  -3  14   2 130.035 8.59286   1 
  -3  14   2 123.804 8.71923   5 
   2 -14  -2 1.51470 3.87061   1 
   2 -14  -2 0.88008 4.02113   6 
  -2  14   2 -2.3058 2.74494   7 
   1 -14  -2 66.2217 7.77746   6 
   1 -14  -2 78.7292 7.99269   1 
  -1  14   2 82.6214 6.87455   7 
   0 -14  -2 2.33561 4.45203   6 
   0 -14  -2 12.8435 4.84023   1 
   0  14   2 6.08888 3.70184   7 
  -1 -14  -2 90.0107 9.08107   6 
  -1 -14  -2 95.8796 8.88046   1 
   1  14   2 90.5982 7.57872   7 
  -2 -14  -2 3.50245 5.12338   6 
  -2 -14  -2 -1.0837 4.18661   1 
   2  14   2 -3.5179 3.71845   7 
  -3 -14  -2 15.2641 5.41492   6 
  -3 -14  -2 11.5903 5.26694   1 
  -4 -14  -2 -3.1787 4.19212   1 
  -4 -14  -2 -8.0749 4.86853   6 
  -5 -14  -2 6.52894 4.98321   1 
 -17  15   2 1.44199 5.65107   1 
  16 -15  -2 66.6548 8.56864   1 
 -16  15   2 61.7390 8.73109   1 
  15 -15  -2 -3.4529 4.20167   1 
 -15  15   2 5.28196 5.12500   1 
  14 -15  -2 72.6955 8.76677   1 
 -14  15   2 54.8090 8.00749   1 
  13 -15  -2 -3.9659 3.44636   6 
  13 -15  -2 0.33875 4.51033   1 
 -13  15   2 0.30329 4.37537   1 
  12 -15  -2 73.7893 7.59946   6 
  12 -15  -2 68.1921 7.98997   1 
 -12  15   2 65.0793 8.04632   1 
  11 -15  -2 33.4148 6.30188   1 
  11 -15  -2 22.8577 5.44142   6 
 -11  15   2 22.5820 5.47922   1 
  10 -15  -2 45.6549 6.72726   6 
  10 -15  -2 38.0182 6.39854   1 
 -10  15   2 28.8921 5.87883   1 
   9 -15  -2 82.5399 8.50763   1 
   9 -15  -2 70.4769 7.52351   6 
  -9  15   2 68.0249 7.69792   1 
   8 -15  -2 22.1127 5.48725   1 
   8 -15  -2 23.7925 5.39406   6 
  -8  15   2 30.6657 5.76576   1 
   7 -15  -2 3.66282 4.22431   1 
   7 -15  -2 10.7515 4.72441   6 
  -7  15   2 2.27000 3.67036   1 
   6 -15  -2 3.63691 3.92822   1 
   6 -15  -2 4.11826 4.32788   6 
  -6  15   2 14.6815 4.64889   1 
   5 -15  -2 153.857 10.3048   1 
   5 -15  -2 146.510 10.1711   6 
  -5  15   2 148.011 9.73499   1 
   4 -15  -2 17.0218 5.35043   6 
   4 -15  -2 16.8039 5.11392   1 
   3 -15  -2 98.1650 9.63219   6 
   3 -15  -2 81.7642 8.33962   1 
   2 -15  -2 4.89021 4.66480   6 
   2 -15  -2 -0.3228 3.84075   1 
   1 -15  -2 25.6411 6.10486   6 
   1 -15  -2 9.99582 5.05157   1 
   0 -15  -2 9.41178 5.18501   1 
   0 -15  -2 5.97992 4.99591   6 
  -1 -15  -2 34.0215 6.51828   1 
  -1 -15  -2 30.5937 6.64147   6 
  -2 -15  -2 -0.5338 4.47277   1 
  -2 -15  -2 -4.0711 5.07062   6 
  -3 -15  -2 3.84698 4.98737   6 
  -3 -15  -2 0.36445 4.54735   1 
  16 -16  -2 78.1785 9.64380   1 
 -16  16   2 106.120 10.9263   1 
  15 -16  -2 4.08003 5.62094   1 
 -15  16   2 1.60279 5.21536   1 
  14 -16  -2 87.7150 9.63908   1 
 -14  16   2 77.3403 9.31271   1 
  13 -16  -2 5.23989 4.55623   6 
  13 -16  -2 12.3358 5.63565   1 
 -13  16   2 8.49829 5.57390   1 
  12 -16  -2 58.9714 8.05271   1 
  12 -16  -2 50.8547 7.37022   6 
 -12  16   2 75.1878 8.57254   1 
  11 -16  -2 1.98232 4.00947   6 
  11 -16  -2 5.94184 5.35886   1 
 -11  16   2 19.1907 5.48323   1 
  10 -16  -2 77.5175 8.60347   1 
  10 -16  -2 67.3376 7.95931   6 
 -10  16   2 68.6962 8.08234   1 
   9 -16  -2 27.3107 6.01503   1 
   9 -16  -2 10.5743 4.99713   6 
  -9  16   2 3.64912 4.34283   1 
   8 -16  -2 29.5588 6.18039   6 
   8 -16  -2 38.6119 6.65784   1 
  -8  16   2 35.9739 6.25468   1 
   7 -16  -2 86.3997 8.71330   1 
   7 -16  -2 85.3968 8.82302   6 
  -7  16   2 89.8883 8.65118   1 
   6 -16  -2 8.82615 5.46399   6 
   6 -16  -2 9.07560 5.16807   1 
   5 -16  -2 125.827 10.9488   6 
   5 -16  -2 157.384 10.9644   1 
   4 -16  -2 8.13513 5.67237   6 
   4 -16  -2 -1.9421 4.32665   1 
   3 -16  -2 17.1827 5.56431   1 
   3 -16  -2 25.7164 6.26776   6 
   2 -16  -2 0.58221 4.61235   6 
   2 -16  -2 0.16798 4.77607   1 
   1 -16  -2 24.7336 6.30009   1 
   1 -16  -2 24.5072 6.51494   6 
   0 -16  -2 1.90951 4.85417   1 
   0 -16  -2 5.36654 5.30362   6 
  -1 -16  -2 -3.1697 4.89260   6 
  -1 -16  -2 8.42387 5.57122   1 
  15 -17  -2 9.15143 5.91175   1 
 -15  17   2 8.72390 5.74458   1 
  14 -17  -2 36.7447 7.43014   1 
 -14  17   2 48.4508 8.10079   1 
  13 -17  -2 42.1783 8.00114   1 
  13 -17  -2 30.5509 6.22232   6 
 -13  17   2 23.5157 6.32120   1 
  12 -17  -2 91.4294 10.0494   1 
  12 -17  -2 103.006 9.84280   6 
 -12  17   2 102.683 10.5322   1 
  11 -17  -2 -7.6235 4.60216   6 
  11 -17  -2 2.08122 5.15940   1 
 -11  17   2 5.43580 4.96487   1 
  10 -17  -2 13.2112 5.32792   6 
  10 -17  -2 11.6802 5.47533   1 
 -10  17   2 6.84906 5.16439   1 
   9 -17  -2 9.63833 5.76858   6 
   9 -17  -2 12.9574 5.65526   1 
  -9  17   2 8.30977 4.89676   1 
   8 -17  -2 6.43148 4.89824   1 
   8 -17  -2 8.69896 5.20812   6 
  -8  17   2 5.30323 4.99947   1 
   7 -17  -2 88.6302 9.95204   6 
   7 -17  -2 64.6064 8.42865   1 
   6 -17  -2 1.58244 4.83530   6 
   6 -17  -2 5.40809 4.68502   1 
   5 -17  -2 6.25824 5.29801   1 
   5 -17  -2 10.8231 5.60261   6 
   4 -17  -2 -1.7579 4.69500   6 
   4 -17  -2 1.30673 4.70447   1 
   3 -17  -2 39.5090 7.17346   1 
   3 -17  -2 39.3617 7.63671   6 
   2 -17  -2 1.21725 4.73491   1 
   2 -17  -2 1.94849 5.34073   6 
   1 -17  -2 0.98703 5.82209   6 
   1 -17  -2 3.37823 5.19275   1 
   0 -17  -2 -5.2108 4.70835   1 
   0 -17  -2 -1.8268 5.21202   6 
  14 -18  -2 33.9385 8.45300   6 
  14 -18  -2 52.0621 8.53982   1 
 -14  18   2 50.7169 8.21676   1 
  13 -18  -2 18.2821 6.40720   6 
  13 -18  -2 22.9839 7.00166   1 
 -13  18   2 18.5596 6.34191   1 
  12 -18  -2 2.85416 4.78769   6 
  12 -18  -2 26.5975 7.00785   1 
 -12  18   2 10.9428 6.16095   1 
  11 -18  -2 15.2085 6.22124   6 
  11 -18  -2 17.9102 6.37531   1 
 -11  18   2 13.4683 5.95318   1 
  10 -18  -2 -1.2036 5.20284   1 
  10 -18  -2 4.97553 5.12406   6 
 -10  18   2 0.06379 7.85525   1 
   9 -18  -2 14.7833 6.42127   6 
   9 -18  -2 29.9757 6.78431   1 
   8 -18  -2 0.17494 5.13629   1 
   8 -18  -2 2.58086 5.34742   6 
   7 -18  -2 7.59949 5.72925   6 
   7 -18  -2 7.66947 5.42386   1 
   6 -18  -2 -4.1602 5.13399   1 
   6 -18  -2 1.82917 5.27989   6 
   5 -18  -2 5.35117 5.48555   1 
   5 -18  -2 -2.3213 5.65357   6 
   4 -18  -2 -2.0177 4.94186   1 
   4 -18  -2 1.85232 5.57846   6 
   3 -18  -2 44.5107 8.43364   6 
   3 -18  -2 50.8488 8.02665   1 
  11 -19  -2 16.3038 6.39695   1 
  11 -19  -2 9.77983 5.74126   6 
  10 -19  -2 2.82001 6.15166   6 
  10 -19  -2 0.61309 5.48639   1 
   9 -19  -2 9.09345 5.89982   1 
   9 -19  -2 9.78442 6.64798   6 
   8 -19  -2 1.69717 5.68267   6 
   8 -19  -2 2.46164 5.43767   1 
   7 -19  -2 25.9577 7.15571   6 
   7 -19  -2 17.5145 6.99019   1 
   5 -19   3 -3.0691 5.30892   6 
   5 -19   3 -3.1210 5.33780   1 
   6 -19   3 41.7461 8.19990   6 
   6 -19   3 45.7867 7.95075   1 
   7 -19   3 5.83632 5.85505   6 
   7 -19   3 -0.7078 5.27545   1 
   8 -19   3 46.8939 8.60878   6 
   8 -19   3 42.3198 7.45228   1 
   9 -19   3 -2.2269 5.68706   6 
   9 -19   3 4.13263 5.46541   1 
  10 -19   3 15.0280 6.27780   1 
  10 -19   3 12.5890 5.94376   6 
  11 -19   3 26.8789 6.61944   6 
  11 -19   3 20.5825 7.18775   1 
  12 -19   3 98.2578 10.9241   1 
  12 -19   3 81.7951 9.39420   6 
   2 -18   3 37.9513 6.68765   1 
   2 -18   3 38.7237 7.79919   6 
   3 -18   3 -0.9420 4.63756   1 
   3 -18   3 -5.3404 4.67586   6 
   4 -18   3 14.9146 6.15754   6 
   4 -18   3 33.9368 6.99010   1 
   5 -18   3 4.97832 5.35456   1 
   5 -18   3 1.33421 5.13800   6 
   6 -18   3 56.3171 8.72830   6 
   6 -18   3 28.0476 6.50477   1 
   7 -18   3 21.3035 6.17007   1 
   7 -18   3 7.48004 5.26972   6 
   8 -18   3 71.0536 8.92961   1 
   8 -18   3 55.7794 8.10458   6 
   9 -18   3 15.8185 6.33739   6 
   9 -18   3 16.8382 5.96223   1 
  10 -18   3 53.2765 8.17699   6 
  10 -18   3 41.6422 7.62811   1 
  11 -18   3 15.7718 5.65529   6 
  11 -18   3 22.9207 6.68741   1 
  12 -18   3 2.27588 5.16073   6 
  12 -18   3 8.17889 6.21449   1 
  13 -18   3 12.1797 6.63149   1 
  13 -18   3 16.3488 5.86421   6 
 -14  18  -3 2.44662 5.32763   1 
  14 -18   3 0.78183 5.48768   1 
  -1 -17   3 37.0238 7.94121   6 
  -1 -17   3 52.5142 7.56406   1 
   0 -17   3 37.6610 6.66315   1 
   0 -17   3 33.5321 7.79270   6 
   1 -17   3 17.4280 5.56945   1 
   1 -17   3 8.75672 5.71974   6 
   2 -17   3 8.72570 4.96605   1 
   2 -17   3 3.78451 5.18654   6 
   3 -17   3 20.8041 5.74211   1 
   3 -17   3 9.01482 5.37428   6 
   4 -17   3 93.1551 9.13995   1 
   4 -17   3 80.3857 9.75449   6 
   5 -17   3 7.63955 4.80886   1 
   5 -17   3 6.31721 5.01820   6 
   6 -17   3 16.1684 5.58741   1 
   6 -17   3 27.2535 6.32275   6 
   7 -17   3 27.3403 6.10132   1 
   7 -17   3 23.9434 6.46074   6 
   8 -17   3 14.5926 5.35926   1 
   8 -17   3 12.4894 5.88930   6 
   9 -17   3 56.1741 8.05031   1 
   9 -17   3 48.6190 7.27263   6 
  10 -17   3 30.6890 6.96011   1 
  10 -17   3 35.1250 6.42082   6 
 -11  17  -3 3.32336 4.40394   1 
  11 -17   3 1.41017 5.15677   1 
  11 -17   3 3.10890 4.42229   6 
 -12  17  -3 -0.6653 4.17149   1 
  12 -17   3 -3.0766 3.79403   6 
  12 -17   3 6.93310 5.11450   1 
 -13  17  -3 2.16253 5.14292   1 
  13 -17   3 3.19207 4.83989   6 
  13 -17   3 -1.6871 4.93498   1 
 -14  17  -3 0.19354 4.65947   1 
  14 -17   3 -7.1187 4.83493   1 
 -15  17  -3 5.45627 5.51424   1 
  15 -17   3 -0.0710 5.57759   1 
   2  16  -3 20.6180 5.48723   7 
  -2 -16   3 37.1778 7.42282   6 
  -2 -16   3 34.3011 6.37514   1 
   1  16  -3 43.5421 6.24467   7 
  -1 -16   3 41.0322 6.58715   1 
  -1 -16   3 39.7828 7.47329   6 
   0  16  -3 11.0339 4.69264   7 
   0 -16   3 15.2061 4.97765   1 
   0 -16   3 19.8680 6.64109   6 
  -1  16  -3 5.28957 3.98431   7 
   1 -16   3 7.66832 5.78457   6 
   1 -16   3 0.44777 4.21496   1 
  -2  16  -3 44.7124 5.86276   7 
   2 -16   3 36.3623 6.13368   1 
   2 -16   3 49.4710 7.48947   6 
  -3  16  -3 73.8788 6.88447   7 
   3 -16   3 70.8783 7.77137   1 
   3 -16   3 56.8454 7.77832   6 
  -4  16  -3 53.3251 6.16159   7 
   4 -16   3 60.2499 7.41958   1 
   4 -16   3 40.4422 7.05391   6 
   5 -16   3 2.08902 4.38962   6 
   5 -16   3 -0.9943 3.95027   1 
   6 -16   3 0.32138 4.20199   1 
   6 -16   3 4.65077 4.57596   6 
   7 -16   3 33.6383 6.41468   6 
   7 -16   3 36.4630 6.38289   1 
   8 -16   3 7.04852 4.60310   1 
   8 -16   3 4.56599 4.31884   6 
  -9  16  -3 11.3378 4.55049   1 
   9 -16   3 6.79489 4.46072   6 
   9 -16   3 3.78906 4.68601   1 
 -10  16  -3 53.4251 7.24972   1 
  10 -16   3 33.4012 6.49392   1 
  10 -16   3 43.3061 6.73476   6 
 -11  16  -3 -1.9123 3.84521   1 
  11 -16   3 -0.8331 3.68279   6 
  11 -16   3 5.99487 4.80003   1 
 -12  16  -3 2.90791 4.15279   1 
  12 -16   3 -4.1663 3.69467   6 
  12 -16   3 5.23454 5.12538   1 
 -13  16  -3 1.77500 4.62330   1 
  13 -16   3 3.89885 4.39963   6 
  13 -16   3 0.69592 4.84673   1 
 -14  16  -3 1.68426 4.71741   1 
  14 -16   3 2.53613 5.51756   1 
 -15  16  -3 -0.0456 5.02455   1 
  15 -16   3 6.80083 5.63350   1 
 -16  16  -3 -1.9403 5.16606   1 
  16 -16   3 5.11078 5.85574   1 
   4  15  -3 17.0223 4.97213   7 
  -4 -15   3 22.8115 5.53830   1 
  -4 -15   3 25.9187 7.04480   6 
   3  15  -3 20.5038 5.01230   7 
  -3 -15   3 21.3270 5.48606   1 
  -3 -15   3 18.6204 6.65367   6 
   2  15  -3 50.5149 6.09180   7 
  -2 -15   3 50.0090 6.69225   1 
  -2 -15   3 57.3544 8.08849   6 
   1  15  -3 37.7516 5.32132   7 
  -1 -15   3 31.4948 5.62860   1 
  -1 -15   3 32.0524 6.58530   6 
   0  15  -3 63.6200 6.41407   7 
   0 -15   3 57.9296 7.06279   1 
   0 -15   3 61.5122 8.39057   6 
  -1  15  -3 24.9712 4.53009   7 
   1 -15   3 21.2303 5.56595   6 
   1 -15   3 14.9207 4.77127   1 
  -2  15  -3 108.050 7.83609   7 
   2 -15   3 105.439 10.0510   6 
   2 -15   3 100.915 8.79833   1 
  -3  15  -3 35.7475 4.93733   7 
   3 -15   3 29.0807 5.43563   1 
   3 -15   3 25.8304 5.84302   6 
  -4  15  -3 6.06752 3.58178   7 
   4 -15   3 19.2369 5.21272   6 
   4 -15   3 14.5543 4.64798   1 
  -5  15  -3 5.87877 3.23927   7 
  -5  15  -3 7.46765 4.46150   5 
   5 -15   3 7.53831 4.48665   6 
   5 -15   3 1.76229 3.73210   1 
  -6  15  -3 6.62039 4.24386   5 
   6 -15   3 15.1330 4.90084   6 
   6 -15   3 6.73318 4.21187   1 
  -7  15  -3 -0.6310 3.38567   5 
  -7  15  -3 -2.2362 3.08974   1 
   7 -15   3 3.22100 4.12349   1 
   7 -15   3 0.93865 3.76974   6 
  -8  15  -3 14.6914 4.48242   1 
   8 -15   3 22.2619 5.13543   6 
   8 -15   3 14.8814 4.80416   1 
  -9  15  -3 1.07647 3.67299   1 
   9 -15   3 2.24335 3.72986   6 
   9 -15   3 1.42379 4.07778   1 
 -10  15  -3 8.35150 4.39913   1 
  10 -15   3 13.3182 4.82317   1 
  10 -15   3 12.5614 4.38297   6 
 -11  15  -3 36.5503 6.16457   1 
  11 -15   3 51.5228 6.40544   6 
  11 -15   3 33.9644 6.19391   1 
 -12  15  -3 24.1554 5.66202   1 
  12 -15   3 26.0087 5.01292   6 
  12 -15   3 22.0101 6.00164   1 
 -13  15  -3 3.88746 4.77936   1 
  13 -15   3 5.49701 4.98486   1 
  13 -15   3 7.05367 4.44431   6 
 -14  15  -3 4.04446 5.16867   1 
  14 -15   3 1.07004 5.07908   1 
 -15  15  -3 5.17690 5.15035   1 
  15 -15   3 6.77154 5.36844   1 
 -16  15  -3 5.29350 5.41695   1 
  16 -15   3 1.70470 5.51073   1 
 -17  15  -3 -3.7586 5.04504   1 
  17 -15   3 0.24334 5.64595   1 
   5  14  -3 67.2795 7.06707   7 
  -5 -14   3 78.9048 9.03763   6 
  -5 -14   3 83.4725 8.19135   1 
   4  14  -3 10.9763 4.18940   7 
  -4 -14   3 5.92075 4.97176   6 
  -4 -14   3 8.36145 4.33563   1 
   3  14  -3 23.8087 4.75912   7 
  -3 -14   3 35.4630 6.44804   6 
  -3 -14   3 28.7814 5.46514   1 
   2  14  -3 30.8549 4.80502   7 
  -2 -14   3 33.1865 5.73731   1 
  -2 -14   3 33.9797 6.30011   6 
   1  14  -3 22.5034 4.36580   7 
  -1 -14   3 22.0935 4.90706   1 
  -1 -14   3 18.3062 5.28373   6 
   0  14  -3 87.3414 6.97244   7 
   0 -14   3 77.7110 7.57113   1 
   0 -14   3 111.584 9.58606   6 
  -1  14  -3 47.0062 6.06235   5 
  -1  14  -3 50.2970 5.41811   7 
   1 -14   3 55.4465 6.39426   1 
   1 -14   3 48.4717 6.81829   6 
  -2  14  -3 8.27202 4.02285   5 
  -2  14  -3 8.45899 3.26513   7 
   2 -14   3 10.4930 4.41510   6 
   2 -14   3 10.1987 3.93859   1 
  -3  14  -3 5.26999 3.40435   5 
  -3  14  -3 7.26845 3.03931   7 
   3 -14   3 9.69877 3.95102   1 
   3 -14   3 3.19144 3.88734   6 
  -4  14  -3 3.29102 2.85758   7 
  -4  14  -3 0.30662 2.92442   5 
   4 -14   3 6.05924 3.90052   6 
   4 -14   3 2.15025 3.26795   1 
  -5  14  -3 7.47107 3.41625   1 
  -5  14  -3 8.75384 3.47468   5 
  -5  14  -3 4.66594 2.98061   7 
   5 -14   3 5.69480 3.70449   1 
   5 -14   3 -3.9128 2.97894   6 
  -6  14  -3 30.3260 4.94313   1 
  -6  14  -3 35.4831 4.47172   7 
  -6  14  -3 35.0454 5.25459   5 
   6 -14   3 34.4709 5.60233   1 
   6 -14   3 27.0271 5.17379   6 
  -7  14  -3 9.93653 3.90564   1 
  -7  14  -3 18.4748 4.26047   5 
   7 -14   3 19.3070 4.64005   1 
   7 -14   3 14.3893 4.40860   6 
  -8  14  -3 -0.1858 3.08257   1 
   8 -14   3 -1.5968 3.11700   6 
   8 -14   3 -1.2771 3.37855   1 
  -9  14  -3 0.87471 3.21705   1 
   9 -14   3 0.03517 3.72961   6 
   9 -14   3 -0.5539 3.65430   1 
 -10  14  -3 -2.4799 3.33604   1 
  10 -14   3 4.48230 3.52430   6 
  10 -14   3 -1.8415 3.66231   1 
 -11  14  -3 1.36031 3.75007   1 
  11 -14   3 -2.1253 3.72920   1 
  11 -14   3 -0.0143 2.96478   6 
 -12  14  -3 30.1703 5.81216   1 
  12 -14   3 26.3584 5.69065   1 
  12 -14   3 27.7605 4.95788   6 
 -13  14  -3 9.46326 4.80851   1 
  13 -14   3 8.83153 5.05044   1 
 -14  14  -3 -1.6873 4.30448   1 
  14 -14   3 5.80533 4.78750   1 
 -15  14  -3 7.49534 5.17055   1 
  15 -14   3 11.6770 5.53732   1 
 -16  14  -3 10.2522 5.80351   1 
  16 -14   3 14.7313 5.90911   1 
 -17  14  -3 7.56606 5.72243   1 
  17 -14   3 6.41272 5.37564   1 
   7  13  -3 2.11170 4.08670   7 
  -7 -13   3 -1.5999 4.02017   1 
   6  13  -3 12.8615 4.34677   7 
  -6 -13   3 18.6505 4.97796   1 
   5  13  -3 89.1531 7.47824   7 
  -5 -13   3 86.7847 8.10441   1 
  -5 -13   3 91.1433 9.15592   6 
   4  13  -3 0.13227 3.24539   7 
  -4 -13   3 7.57062 4.98652   6 
  -4 -13   3 7.26636 4.10248   1 
   3  13  -3 4.62949 3.26794   7 
  -3 -13   3 4.90452 3.79918   1 
  -3 -13   3 -0.1504 4.25592   6 
   2  13  -3 20.4672 3.84684   7 
  -2 -13   3 20.5540 4.54201   1 
  -2 -13   3 27.2371 5.35151   6 
   1  13  -3 38.7641 4.62136   7 
   1  13  -3 31.0510 5.01084   5 
  -1 -13   3 30.0952 5.03777   1 
  -1 -13   3 38.8351 6.09597   6 
   0  13  -3 61.0541 5.49099   7 
   0  13  -3 56.3091 6.18513   5 
   0 -13   3 49.5679 5.75357   1 
   0 -13   3 52.1936 6.59828   6 
  -1  13  -3 5.08129 3.13627   5 
  -1  13  -3 3.19373 2.60800   7 
   1 -13   3 0.59910 2.96382   1 
   1 -13   3 6.46723 3.96964   6 
  -2  13  -3 -0.2264 2.54312   7 
  -2  13  -3 -5.4871 2.26880   5 
   2 -13   3 0.36392 3.33557   6 
   2 -13   3 1.86769 3.16519   1 
  -3  13  -3 17.9023 4.17421   1 
  -3  13  -3 21.7261 3.54298   7 
  -3  13  -3 25.0185 4.53415   5 
   3 -13   3 17.4662 4.42348   6 
   3 -13   3 15.9677 3.95769   1 
  -4  13  -3 6.18911 3.08751   1 
  -4  13  -3 -1.6779 2.55666   5 
  -4  13  -3 1.17755 2.46982   7 
   4 -13   3 -5.7021 2.92122   6 
   4 -13   3 -1.7457 2.70593   1 
  -5  13  -3 85.8888 6.13936   7 
  -5  13  -3 95.3828 7.39748   1 
  -5  13  -3 81.2164 7.10042   5 
   5 -13   3 83.1792 7.60036   6 
   5 -13   3 91.1300 7.37284   1 
  -6  13  -3 2.81151 2.97110   5 
  -6  13  -3 -0.0490 2.77151   1 
  -6  13  -3 -0.7713 2.15386   7 
   6 -13   3 -0.9110 3.03491   6 
   6 -13   3 0.64993 2.93532   1 
  -7  13  -3 -2.9770 2.18190   7 
  -7  13  -3 0.57515 2.80117   1 
  -7  13  -3 -2.2251 2.49919   5 
   7 -13   3 0.96206 3.09405   6 
   7 -13   3 0.22000 3.30479   1 
  -8  13  -3 14.6514 3.79031   1 
   8 -13   3 10.2829 3.90801   6 
   8 -13   3 2.81949 3.41322   1 
  -9  13  -3 -2.0983 2.66118   1 
   9 -13   3 1.54361 3.42468   1 
   9 -13   3 3.06233 2.91379   6 
 -10  13  -3 3.54449 3.47412   1 
  10 -13   3 7.23666 3.25563   6 
  10 -13   3 3.07416 3.78496   1 
 -11  13  -3 -1.3796 3.56469   1 
  11 -13   3 5.75927 4.17451   1 
  11 -13   3 -4.4867 2.84231   6 
 -12  13  -3 11.8516 4.47173   1 
  12 -13   3 7.79963 4.34680   1 
  12 -13   3 20.4392 4.12553   6 
 -13  13  -3 52.9140 7.27899   1 
  13 -13   3 61.2890 7.35628   1 
 -14  13  -3 16.7305 5.32121   1 
  14 -13   3 16.5284 5.43076   1 
 -15  13  -3 70.0738 8.63003   1 
  15 -13   3 69.6282 8.35528   1 
 -16  13  -3 0.70456 4.96083   1 
  16 -13   3 3.47277 4.76966   1 
 -17  13  -3 -3.2093 5.06504   1 
  17 -13   3 -5.4071 4.91568   1 
 -18  13  -3 -3.4451 5.25221   1 
   8  12  -3 29.6357 5.40596   7 
  -8 -12   3 23.9269 5.37388   1 
  -8 -12   3 24.1019 5.28927   1 
   7  12  -3 18.3624 4.53668   7 
  -7 -12   3 28.1131 5.35494   1 
   6  12  -3 10.9318 3.93448   7 
  -6 -12   3 3.42865 3.70441   1 
  -6 -12   3 1.07294 4.30542   6 
   5  12  -3 38.7464 5.09314   7 
  -5 -12   3 32.4662 5.31838   1 
  -5 -12   3 31.6176 5.60161   6 
   4  12  -3 42.0224 4.95687   7 
  -4 -12   3 66.2350 6.48246   1 
  -4 -12   3 59.6660 7.11804   6 
   3  12  -3 11.4970 3.34354   7 
   3  12  -3 1.62377 3.10152   5 
  -3 -12   3 9.02708 3.96559   6 
  -3 -12   3 14.0791 3.95404   1 
   2  12  -3 53.3849 6.06010   5 
   2  12  -3 43.3390 4.65881   7 
  -2 -12   3 57.8538 6.97132   6 
  -2 -12   3 40.4631 5.16320   1 
   1  12  -3 15.4972 3.24782   7 
   1  12  -3 15.2260 3.96020   5 
  -1 -12   3 14.2980 3.80149   1 
  -1 -12   3 6.66008 3.74284   6 
   0  12  -3 2.37214 2.72792   5 
   0  12  -3 -0.9611 2.24570   7 
   0 -12   3 1.43975 2.86018   1 
   0 -12   3 -2.0858 2.95316   6 
  -1  12  -3 21.8775 3.36874   7 
  -1  12  -3 23.7743 4.05168   5 
   1 -12   3 10.8195 3.37207   1 
   1 -12   3 17.1314 4.22353   6 
  -2  12  -3 4.84146 2.47668   7 
  -2  12  -3 6.95939 2.85551   5 
  -2  12  -3 6.23110 2.82732   1 
   2 -12   3 3.43381 2.82605   1 
   2 -12   3 13.2642 3.91802   6 
  -3  12  -3 109.676 7.25646   5 
  -3  12  -3 103.300 5.94761   7 
  -3  12  -3 102.177 6.63081   1 
   3 -12   3 120.646 7.70882   6 
   3 -12   3 101.234 6.83380   1 
  -4  12  -3 0.05739 2.46488   5 
  -4  12  -3 -0.8134 2.00045   7 
  -4  12  -3 2.39067 2.62773   1 
   4 -12   3 2.61839 2.81426   1 
   4 -12   3 -6.3122 2.43100   6 
  -5  12  -3 28.5472 4.56223   5 
  -5  12  -3 21.5749 3.34470   7 
  -5  12  -3 31.1189 4.45841   1 
   5 -12   3 25.7234 4.41783   1 
   5 -12   3 21.8221 4.25500   6 
  -6  12  -3 34.8947 4.54154   5 
  -6  12  -3 37.6662 4.72657   1 
  -6  12  -3 29.8922 3.78961   7 
   6 -12   3 31.6382 4.45395   1 
   6 -12   3 29.7230 4.53576   6 
  -7  12  -3 29.4778 4.45368   1 
  -7  12  -3 30.2852 3.72861   7 
   7 -12   3 25.2954 4.49103   1 
   7 -12   3 24.1170 4.26321   6 
  -8  12  -3 1.46409 2.43886   7 
  -8  12  -3 7.85853 3.23411   1 
   8 -12   3 2.13892 3.11808   1 
   8 -12   3 4.29803 2.80538   6 
  -9  12  -3 13.0867 3.96337   1 
   9 -12   3 7.34633 3.30615   6 
   9 -12   3 6.49831 3.58792   1 
 -10  12  -3 9.00753 3.70242   1 
  10 -12   3 16.4712 4.40678   1 
  10 -12   3 9.54957 3.32272   6 
 -11  12  -3 71.2685 7.35756   1 
  11 -12   3 67.1204 6.94750   1 
  11 -12   3 82.4750 6.03188   6 
 -12  12  -3 -1.0666 3.68588   1 
  12 -12   3 -1.9185 3.56693   1 
  12 -12   3 2.25994 2.75829   6 
 -13  12  -3 80.1581 8.28275   1 
  13 -12   3 69.9338 7.59950   1 
 -14  12  -3 3.40203 4.13910   1 
  14 -12   3 5.54886 4.64185   1 
 -15  12  -3 160.152 10.9964   1 
  15 -12   3 114.499 10.0822   1 
 -16  12  -3 -1.5913 4.48300   1 
  16 -12   3 3.25738 4.73350   1 
 -17  12  -3 -2.1458 4.91923   1 
 -18  12  -3 3.53307 5.37117   1 
   9  11  -3 41.5938 5.86968   7 
  -9 -11   3 50.8653 6.45163   1 
   8  11  -3 4.28980 3.80024   7 
  -8 -11   3 0.34100 3.89315   1 
  -8 -11   3 3.67840 3.85111   1 
   7  11  -3 14.2554 4.07378   7 
  -7 -11   3 16.6777 4.38028   1 
   6  11  -3 7.39169 3.30563   7 
  -6 -11   3 -0.1807 3.07483   1 
  -6 -11   3 3.57007 3.65107   6 
   5  11  -3 16.0270 4.21031   5 
   5  11  -3 9.65453 3.37260   7 
  -5 -11   3 10.0433 3.77926   1 
  -5 -11   3 11.2442 4.38069   6 
   4  11  -3 91.5510 6.21943   7 
   4  11  -3 104.508 8.21077   5 
  -4 -11   3 100.915 8.31250   6 
  -4 -11   3 92.1795 7.45346   1 
   3  11  -3 15.2104 3.24724   7 
   3  11  -3 27.9682 4.48186   5 
   3  11  -3 28.4714 3.89934   2 
  -3 -11   3 17.8940 4.39487   6 
  -3 -11   3 22.0753 4.25359   1 
   2  11  -3 11.7608 3.58962   5 
   2  11  -3 7.98168 2.52727   2 
   2  11  -3 13.4232 2.93661   7 
  -2 -11   3 12.5957 3.25461   1 
  -2 -11   3 12.8958 3.88053   6 
   1  11  -3 6.39111 2.93903   5 
   1  11  -3 8.04566 2.46234   2 
   1  11  -3 7.02590 2.60857   7 
  -1 -11   3 9.58072 3.57126   6 
  -1 -11   3 7.51215 2.96418   1 
   0  11  -3 133.014 7.20996   2 
   0  11  -3 143.850 7.13196   2 
   0  11  -3 143.509 6.81553   7 
   0  11  -3 146.813 7.86158   5 
   0 -11   3 144.228 7.80757   1 
   0 -11   3 135.342 8.17777   6 
  -1  11  -3 -0.4493 1.80289   2 
  -1  11  -3 -3.7470 1.66837   7 
  -1  11  -3 -1.5229 1.59309   2 
  -1  11  -3 7.90283 2.53154   1 
  -1  11  -3 -1.6299 2.02480   5 
   1 -11   3 -1.0751 2.56688   6 
   1 -11   3 -0.0755 2.25024   1 
  -2  11  -3 41.2920 3.79168   7 
  -2  11  -3 46.0494 4.84871   5 
  -2  11  -3 45.3636 4.72103   2 
  -2  11  -3 42.9100 4.43244   1 
  -2  11  -3 42.7633 4.11838   2 
   2 -11   3 54.7911 5.10407   1 
   2 -11   3 40.5096 5.05217   6 
  -3  11  -3 23.6289 3.29052   2 
  -3  11  -3 25.4973 3.79129   5 
  -3  11  -3 25.1405 3.73877   1 
  -3  11  -3 23.0451 3.11919   7 
   3 -11   3 17.4222 3.35883   1 
   3 -11   3 19.8503 3.85071   6 
  -4  11  -3 69.0732 4.94537   2 
  -4  11  -3 59.8747 4.61183   7 
  -4  11  -3 71.4632 5.84014   5 
  -4  11  -3 78.7562 6.17136   1 
   4 -11   3 74.1149 6.30906   6 
   4 -11   3 74.8683 5.46016   1 
  -5  11  -3 61.2263 5.44012   5 
  -5  11  -3 58.3728 5.44542   1 
  -5  11  -3 57.8359 4.59033   7 
   5 -11   3 59.9215 5.29170   1 
   5 -11   3 56.8715 5.57285   6 
  -6  11  -3 1.12863 2.27581   5 
  -6  11  -3 -1.3938 2.02907   1 
  -6  11  -3 -2.8667 1.71556   7 
   6 -11   3 1.29800 2.51473   1 
   6 -11   3 4.50792 2.97770   6 
  -7  11  -3 39.9472 4.79512   1 
  -7  11  -3 40.4963 4.02570   7 
   7 -11   3 43.5733 4.94325   1 
   7 -11   3 38.2445 4.62348   6 
  -8  11  -3 -0.0644 1.82565   7 
  -8  11  -3 -0.9765 2.53827   1 
   8 -11   3 -0.6817 2.03141   6 
   8 -11   3 2.53507 2.84928   1
[truncated: 3,046,888 more chars]
