# Supplementary material for: Metathesis of Ge=Ge double bonds
Source: Springer Nature journal article supplement (doi:10.1038/s41557-021-00639-9), 2021-03-01
Supplement: 41557_2021_639_MOESM35_ESM.cif [file 41557_2021_639_MOESM35_ESM.cif]

 
data_sh4197 
  
_audit_creation_method            'SHELXL-2018/3' 
_shelx_SHELXL_version_number      '2018/3' 
_chemical_name_systematic         ? 
_chemical_name_common             ? 
_chemical_melting_point           ? 
_chemical_formula_moiety          ? 
_chemical_formula_sum 
 'C14 H26 Cl2 N2 Si2' 
_chemical_formula_weight          349.45 
  
loop_ 
 _atom_type_symbol 
 _atom_type_description 
 _atom_type_scat_dispersion_real 
 _atom_type_scat_dispersion_imag 
 _atom_type_scat_source 
 'C'  'C'   0.0033   0.0016 
 'International Tables Vol C Tables 4.2.6.8 and 6.1.1.4' 
 'H'  'H'   0.0000   0.0000 
 'International Tables Vol C Tables 4.2.6.8 and 6.1.1.4' 
 'N'  'N'   0.0061   0.0033 
 'International Tables Vol C Tables 4.2.6.8 and 6.1.1.4' 
 'Si'  'Si'   0.0817   0.0704 
 'International Tables Vol C Tables 4.2.6.8 and 6.1.1.4' 
 'Cl'  'Cl'   0.1484   0.1585 
 'International Tables Vol C Tables 4.2.6.8 and 6.1.1.4' 
  
_space_group_crystal_system       triclinic 
_space_group_IT_number            2 
_space_group_name_H-M_alt         'P -1' 
_space_group_name_Hall            '-P 1' 
  
_shelx_space_group_comment 
; 
The symmetry employed for this shelxl refinement is uniquely defined 
by the following loop, which should always be used as a source of 
symmetry information in preference to the above space-group names. 
They are only intended as comments. 
; 
  
loop_ 
 _space_group_symop_operation_xyz 
 'x, y, z' 
 '-x, -y, -z' 
  
_cell_length_a                    6.3961(7) 
_cell_length_b                    9.0974(9) 
_cell_length_c                    9.4554(10) 
_cell_angle_alpha                 62.274(3) 
_cell_angle_beta                  89.152(4) 
_cell_angle_gamma                 81.605(4) 
_cell_volume                      480.91(9) 
_cell_formula_units_Z             1 
_cell_measurement_temperature     133(2) 
_cell_measurement_reflns_used     1860 
_cell_measurement_theta_min       2.44 
_cell_measurement_theta_max       27.22 
  
_exptl_crystal_description        plate 
_exptl_crystal_colour             colourless 
_exptl_crystal_density_meas       ? 
_exptl_crystal_density_method     ? 
_exptl_crystal_density_diffrn     1.207 
_exptl_crystal_F_000              186 
_exptl_transmission_factor_min    ? 
_exptl_transmission_factor_max    ? 
_exptl_crystal_size_max           0.209 
_exptl_crystal_size_mid           0.133 
_exptl_crystal_size_min           0.076 
_exptl_absorpt_coefficient_mu     0.456 
_shelx_estimated_absorpt_T_min    0.911 
_shelx_estimated_absorpt_T_max    0.966 
_exptl_absorpt_correction_type   multi-scan 
_exptl_absorpt_correction_T_min  0.6790 
_exptl_absorpt_correction_T_max  0.7456 
_exptl_absorpt_process_details 
; 
 SADABS 2016/2: Krause, L., Herbst-Irmer, R., Sheldrick G.M. & Stalke D., 
 J. Appl. Cryst. 48 (2015) 3-10 
; 
_exptl_absorpt_special_details    ? 
_diffrn_ambient_temperature       133(2) 
_diffrn_radiation_wavelength      0.71073 
_diffrn_radiation_type            MoK\a 
_diffrn_source                    ? 
_diffrn_measurement_device_type   'Bruker APEX-II CCD' 
_diffrn_measurement_method        '\f and \w scans' 
_diffrn_detector_area_resol_mean  ? 
_diffrn_reflns_number             6676 
_diffrn_reflns_av_unetI/netI      0.0604 
_diffrn_reflns_av_R_equivalents   0.0543 
_diffrn_reflns_limit_h_min        -7 
_diffrn_reflns_limit_h_max        8 
_diffrn_reflns_limit_k_min        -11 
_diffrn_reflns_limit_k_max        11 
_diffrn_reflns_limit_l_min        -12 
_diffrn_reflns_limit_l_max        12 
_diffrn_reflns_theta_min          2.438 
_diffrn_reflns_theta_max          27.870 
_diffrn_reflns_theta_full         25.242 
_diffrn_measured_fraction_theta_max   0.989 
_diffrn_measured_fraction_theta_full  0.995 
_diffrn_reflns_Laue_measured_fraction_max    0.989 
_diffrn_reflns_Laue_measured_fraction_full   0.995 
_diffrn_reflns_point_group_measured_fraction_max   0.989 
_diffrn_reflns_point_group_measured_fraction_full  0.995 
_reflns_number_total              2265 
_reflns_number_gt                 1769 
_reflns_threshold_expression      'I > 2\s(I)' 
_reflns_Friedel_coverage          0.000 
_reflns_Friedel_fraction_max      . 
_reflns_Friedel_fraction_full     . 
  
_reflns_special_details 
; 
 Reflections were merged by SHELXL according to the crystal 
 class for the calculation of statistics and refinement. 
  
 _reflns_Friedel_fraction is defined as the number of unique 
 Friedel pairs measured divided by the number that would be 
 possible theoretically, ignoring centric projections and 
 systematic absences. 
; 
  
_computing_data_collection        'Bruker APEX2' 
_computing_cell_refinement        'Bruker SAINT' 
_computing_data_reduction         'Bruker SAINT' 
_computing_structure_solution     'SHELXS-97 (Sheldrick 2008)' 
_computing_structure_refinement 'SHELXL-2018/3 (Sheldrick, 2018)' 
_computing_molecular_graphics     'Bruker SHELXTL' 
_computing_publication_material   'Bruker SHELXTL' 
_refine_special_details           ? 
_refine_ls_structure_factor_coef  Fsqd 
_refine_ls_matrix_type            full 
_refine_ls_weighting_scheme       calc 
_refine_ls_weighting_details 
'w=1/[\s^2^(Fo^2^)+(0.0631P)^2^+0.7210P] where P=(Fo^2^+2Fc^2^)/3' 
_atom_sites_solution_primary      ? 
_atom_sites_solution_secondary    ? 
_atom_sites_solution_hydrogens    difmap 
_refine_ls_hydrogen_treatment     refall 
_refine_ls_extinction_method      none 
_refine_ls_extinction_coef        . 
_refine_ls_number_reflns          2265 
_refine_ls_number_parameters      143 
_refine_ls_number_restraints      0 
_refine_ls_R_factor_all           0.0812 
_refine_ls_R_factor_gt            0.0576 
_refine_ls_wR_factor_ref          0.1606 
_refine_ls_wR_factor_gt           0.1463 
_refine_ls_goodness_of_fit_ref    1.086 
_refine_ls_restrained_S_all       1.086 
_refine_ls_shift/su_max           0.006 
_refine_ls_shift/su_mean          0.000 
  
loop_ 
 _atom_site_label 
 _atom_site_type_symbol 
 _atom_site_fract_x 
 _atom_site_fract_y 
 _atom_site_fract_z 
 _atom_site_U_iso_or_equiv 
 _atom_site_adp_type 
 _atom_site_occupancy 
 _atom_site_site_symmetry_order 
 _atom_site_calc_flag 
 _atom_site_refinement_flags_posn 
 _atom_site_refinement_flags_adp 
 _atom_site_refinement_flags_occupancy 
 _atom_site_disorder_assembly 
 _atom_site_disorder_group 
Si Si 0.31887(13) 0.41837(11) 0.80480(10) 0.0246(3) Uani 1 1 d . . . . . 
Cl Cl 0.30956(16) 0.64732(12) 0.80597(12) 0.0427(3) Uani 1 1 d . . . . . 
N N 0.2458(4) 0.1828(3) 0.6924(3) 0.0265(6) Uani 1 1 d . . . . . 
C1 C 0.1362(5) 0.4718(4) 0.6290(3) 0.0222(6) Uani 1 1 d . . . . . 
C2 C 0.1177(5) 0.3442(4) 0.5915(3) 0.0213(6) Uani 1 1 d . . . . . 
C3 C -0.0144(5) 0.3699(4) 0.4652(4) 0.0225(6) Uani 1 1 d . . . . . 
C4 C 0.2243(7) 0.2749(6) 0.9995(4) 0.0352(8) Uani 1 1 d . . . . . 
C5 C 0.6009(6) 0.3548(6) 0.7836(5) 0.0347(8) Uani 1 1 d . . . . . 
C6 C 0.1152(7) 0.0523(5) 0.7799(5) 0.0362(8) Uani 1 1 d . . . . . 
C7 C 0.3994(7) 0.1298(6) 0.6034(5) 0.0420(10) Uani 1 1 d . . . . . 
H4 H -0.022(5) 0.287(4) 0.440(3) 0.009(7) Uiso 1 1 d . . . . . 
H5 H 0.242(7) 0.185(6) 1.003(5) 0.041(13) Uiso 1 1 d . . . . . 
H6 H 0.090(9) 0.303(7) 1.004(6) 0.067(16) Uiso 1 1 d . . . . . 
H7 H 0.295(7) 0.275(6) 1.077(6) 0.049(13) Uiso 1 1 d . . . . . 
H8 H 0.670(8) 0.356(6) 0.853(6) 0.058(15) Uiso 1 1 d . . . . . 
H9 H 0.618(7) 0.255(6) 0.796(5) 0.039(12) Uiso 1 1 d . . . . . 
H10 H 0.639(7) 0.408(6) 0.687(6) 0.050(13) Uiso 1 1 d . . . . . 
H11 H 0.201(7) -0.037(5) 0.846(5) 0.033(10) Uiso 1 1 d . . . . . 
H12 H 0.034(7) 0.026(6) 0.709(5) 0.050(13) Uiso 1 1 d . . . . . 
H13 H 0.019(8) 0.085(6) 0.830(6) 0.056(14) Uiso 1 1 d . . . . . 
H14 H 0.473(8) 0.043(6) 0.667(6) 0.054(14) Uiso 1 1 d . . . . . 
H15 H 0.338(7) 0.103(6) 0.530(5) 0.047(13) Uiso 1 1 d . . . . . 
H16 H 0.494(6) 0.215(5) 0.546(4) 0.022(9) Uiso 1 1 d . . . . . 
  
loop_ 
 _atom_site_aniso_label 
 _atom_site_aniso_U_11 
 _atom_site_aniso_U_22 
 _atom_site_aniso_U_33 
 _atom_site_aniso_U_23 
 _atom_site_aniso_U_13 
 _atom_site_aniso_U_12 
Si 0.0173(4) 0.0289(5) 0.0213(4) -0.0068(3) -0.0006(3) -0.0026(3) 
Cl 0.0453(6) 0.0424(5) 0.0456(5) -0.0252(4) -0.0068(4) -0.0045(4) 
N 0.0249(14) 0.0223(13) 0.0231(12) -0.0052(10) -0.0001(10) 0.0039(11) 
C1 0.0162(13) 0.0229(15) 0.0214(14) -0.0061(11) 0.0018(11) -0.0003(11) 
C2 0.0156(13) 0.0206(14) 0.0225(14) -0.0065(11) 0.0021(11) 0.0000(11) 
C3 0.0213(15) 0.0205(15) 0.0241(15) -0.0095(12) 0.0016(11) -0.0023(12) 
C4 0.032(2) 0.044(2) 0.0242(17) -0.0101(16) 0.0024(14) -0.0105(17) 
C5 0.0221(17) 0.042(2) 0.032(2) -0.0109(17) 0.0000(15) -0.0035(15) 
C6 0.037(2) 0.0229(17) 0.0368(19) -0.0053(15) -0.0027(17) -0.0014(15) 
C7 0.040(2) 0.038(2) 0.035(2) -0.0130(18) -0.0004(17) 0.0164(18) 
  
_geom_special_details 
; 
 All esds (except the esd in the dihedral angle between two l.s. planes) 
 are estimated using the full covariance matrix.  The cell esds are taken 
 into account individually in the estimation of esds in distances, angles 
 and torsion angles; correlations between esds in cell parameters are only 
 used when they are defined by crystal symmetry.  An approximate (isotropic) 
 treatment of cell esds is used for estimating esds involving l.s. planes. 
; 
  
loop_ 
 _geom_bond_atom_site_label_1 
 _geom_bond_atom_site_label_2 
 _geom_bond_distance 
 _geom_bond_site_symmetry_2 
 _geom_bond_publ_flag 
Si C5 1.849(4) . ? 
Si C4 1.849(4) . ? 
Si C1 1.872(3) . ? 
Si Cl 2.0802(14) . ? 
N C2 1.451(4) . ? 
N C7 1.456(4) . ? 
N C6 1.465(5) . ? 
C1 C2 1.383(5) . ? 
C1 C3 1.404(4) 2_566 ? 
C2 C3 1.380(4) . ? 
C3 H4 0.90(3) . ? 
C4 H5 0.79(5) . ? 
C4 H6 0.87(6) . ? 
C4 H7 0.87(5) . ? 
C5 H8 0.80(5) . ? 
C5 H9 0.85(5) . ? 
C5 H10 0.86(5) . ? 
C6 H11 0.87(4) . ? 
C6 H12 0.99(5) . ? 
C6 H13 0.87(5) . ? 
C7 H14 0.82(5) . ? 
C7 H15 0.95(5) . ? 
C7 H16 1.00(4) . ? 
  
loop_ 
 _geom_angle_atom_site_label_1 
 _geom_angle_atom_site_label_2 
 _geom_angle_atom_site_label_3 
 _geom_angle 
 _geom_angle_site_symmetry_1 
 _geom_angle_site_symmetry_3 
 _geom_angle_publ_flag 
C5 Si C4 112.71(19) . . ? 
C5 Si C1 115.10(17) . . ? 
C4 Si C1 113.84(17) . . ? 
C5 Si Cl 104.41(16) . . ? 
C4 Si Cl 105.98(17) . . ? 
C1 Si Cl 103.39(11) . . ? 
C2 N C7 112.4(3) . . ? 
C2 N C6 111.8(3) . . ? 
C7 N C6 110.7(3) . . ? 
C2 C1 C3 117.8(3) . 2_566 ? 
C2 C1 Si 117.1(2) . . ? 
C3 C1 Si 125.1(3) 2_566 . ? 
C3 C2 C1 121.7(3) . . ? 
C3 C2 N 122.4(3) . . ? 
C1 C2 N 115.9(3) . . ? 
C2 C3 C1 120.5(3) . 2_566 ? 
C2 C3 H4 121.0(19) . . ? 
C1 C3 H4 118.5(19) 2_566 . ? 
Si C4 H5 105(3) . . ? 
Si C4 H6 111(3) . . ? 
H5 C4 H6 108(5) . . ? 
Si C4 H7 110(3) . . ? 
H5 C4 H7 112(4) . . ? 
H6 C4 H7 111(4) . . ? 
Si C5 H8 108(4) . . ? 
Si C5 H9 109(3) . . ? 
H8 C5 H9 108(4) . . ? 
Si C5 H10 113(3) . . ? 
H8 C5 H10 117(5) . . ? 
H9 C5 H10 101(4) . . ? 
N C6 H11 107(3) . . ? 
N C6 H12 113(3) . . ? 
H11 C6 H12 109(4) . . ? 
N C6 H13 111(3) . . ? 
H11 C6 H13 112(4) . . ? 
H12 C6 H13 104(4) . . ? 
N C7 H14 108(3) . . ? 
N C7 H15 114(3) . . ? 
H14 C7 H15 106(4) . . ? 
N C7 H16 112(2) . . ? 
H14 C7 H16 108(4) . . ? 
H15 C7 H16 109(3) . . ? 
  
_refine_diff_density_max    0.457 
_refine_diff_density_min   -0.662 
_refine_diff_density_rms    0.084 
  
_shelx_res_file 
; 
TITL sh4197 in P-1 
    sh4197.res 
    created by SHELXL-2018/3 at 15:38:08 on 29-Aug-2019 
CELL 0.71073   6.39610   9.09740   9.45540  62.2738  89.1520  81.6055 
ZERR    1.00   0.00070   0.00090   0.00100   0.0032   0.0039   0.0040 
LATT 1 
SFAC C  H  N  Si Cl 
UNIT 14 26 2 2 2 
LIST 6 ! automatically inserted. Change 6 to 4 for CHECKCIF!! 
L.S. 4 
BOND $H 
FMAP 2 
PLAN -5 
ACTA 
SIZE 0.076 0.133 0.209 
TEMP -140.150 
WGHT    0.063100    0.721000 
FVAR       1.73548 
SI    4    0.318868    0.418370    0.804802    11.00000    0.01733    0.02894 = 
         0.02125   -0.00678   -0.00059   -0.00264 
CL    5    0.309564    0.647320    0.805968    11.00000    0.04531    0.04237 = 
         0.04557   -0.02518   -0.00681   -0.00445 
N     3    0.245793    0.182807    0.692389    11.00000    0.02491    0.02227 = 
         0.02314   -0.00522   -0.00006    0.00394 
C1    1    0.136188    0.471846    0.629005    11.00000    0.01619    0.02292 = 
         0.02141   -0.00610    0.00176   -0.00029 
C2    1    0.117680    0.344160    0.591493    11.00000    0.01558    0.02064 = 
         0.02247   -0.00649    0.00212    0.00004 
C3    1   -0.014352    0.369947    0.465214    11.00000    0.02134    0.02046 = 
         0.02407   -0.00946    0.00159   -0.00227 
C4    1    0.224250    0.274932    0.999495    11.00000    0.03190    0.04396 = 
         0.02417   -0.01009    0.00245   -0.01049 
C5    1    0.600858    0.354799    0.783638    11.00000    0.02211    0.04151 = 
         0.03229   -0.01091   -0.00001   -0.00348 
C6    1    0.115234    0.052289    0.779906    11.00000    0.03737    0.02294 = 
         0.03684   -0.00532   -0.00269   -0.00136 
C7    1    0.399362    0.129785    0.603371    11.00000    0.03994    0.03829 = 
         0.03521   -0.01299   -0.00043    0.01640 
H4    2   -0.021907    0.287446    0.439767    11.00000    0.00937 
H5    2    0.242476    0.185458    1.002547    11.00000    0.04096 
H6    2    0.089596    0.302827    1.003692    11.00000    0.06748 
H7    2    0.294716    0.275329    1.077117    11.00000    0.04863 
H8    2    0.669905    0.355714    0.852526    11.00000    0.05841 
H9    2    0.618230    0.254714    0.795994    11.00000    0.03877 
H10   2    0.639498    0.408406    0.687044    11.00000    0.04990 
H11   2    0.201070   -0.037413    0.845590    11.00000    0.03337 
H12   2    0.033825    0.025644    0.708890    11.00000    0.05032 
H13   2    0.019413    0.085072    0.829833    11.00000    0.05563 
H14   2    0.472590    0.043019    0.667360    11.00000    0.05372 
H15   2    0.337779    0.103152    0.529562    11.00000    0.04744 
H16   2    0.494113    0.215078    0.546188    11.00000    0.02220 
HKLF 4 
  
  
  
  
REM  sh4197 in P-1 
REM wR2 = 0.160622, GooF = S = 1.08586, Restrained GooF = 1.08586 for all data 
REM R1 = 0.057552 for 1769 Fo > 4sig(Fo) and 0.081195 for all 2265 data 
REM 143 parameters refined using 0 restraints 
  
END 
  
WGHT      0.0631      0.7156 
  
REM Highest difference peak  0.457,  deepest hole -0.662,  1-sigma level  0.084 
Q1    1   0.3188  0.4841  0.8364  11.00000  0.05    0.46 
Q2    1   0.0740  0.5371  0.5950  11.00000  0.05    0.42 
Q3    1   0.1219  0.4127  0.6024  11.00000  0.05    0.38 
Q4    1   0.1701  0.1810  0.7026  11.00000  0.05    0.34 
Q5    1   0.1953  0.4321  0.6792  11.00000  0.05    0.33 
; 
_shelx_res_checksum    1649 
  
_shelx_hkl_file 
; 
  -1   0   0 45.4702 6.37446   2 
  -1   0   0 26.9460 6.36418   1 
   1   0   0 36.4286 6.54488   1 
  -2   0   0 3539.70 123.201   1 
   2   0   0 3523.76 122.607   1 
  -3   0   0 2506.26 95.0124   1 
   3   0   0 2488.84 92.0419   2 
   3   0   0 2485.43 94.0583   1 
  -4   0   0 119.442 19.3992   1 
   4   0   0 111.389 18.4417   1 
   5   0   0 663.095 39.8827   4 
   5   0   0 675.126 41.6896   1 
   6   0   0 245.036 28.0271   1 
   6   0   0 252.325 28.3893   4 
   7   0   0 119.006 21.5408   4 
   7   0   0 215.448 32.2895   1 
   8   0   0 2.04722 14.4978   4 
   8   0   0 16.7246 16.3039   1 
   8  -1   0 -2.5827 21.0173   1 
   8  -1   0 -24.973 13.4248   4 
   7  -1   0 273.523 31.0894   4 
   7  -1   0 279.038 32.6426   1 
   6  -1   0 511.448 45.4425   1 
   6  -1   0 581.777 40.0886   4 
   5  -1   0 529.204 39.2380   1 
   5  -1   0 655.383 39.4965   4 
   4  -1   0 12.9863 10.1454   1 
  -4   1   0 2.13884 9.77013   1 
   3  -1   0 2230.50 87.6046   2 
   3  -1   0 2444.10 89.9259   1 
  -3   1   0 2280.99 90.5247   1 
  -3   1   0 2181.08 85.8895   2 
   2  -1   0 3713.96 127.464   1 
   2  -1   0 3647.82 126.660   2 
  -2   1   0 3612.15 126.017   2 
  -2   1   0 3482.88 127.371   1 
   1  -1   0 2214.10 79.1957   1 
   1  -1   0 2302.45 80.0563   2 
  -1   1   0 2266.23 80.2236   2 
  -1   1   0 2236.29 79.5916   1 
   0  -1   0 6535.35 206.667   1 
   0  -1   0 6234.06 207.884   3 
   0   1   0 6313.26 207.971   3 
   0   1   0 6424.78 206.700   1 
  -1  -1   0 1023.08 37.2817   3 
   1   1   0 996.113 37.0074   3 
   1   1   0 961.791 34.6104   4 
   2   1   0 44.8145 9.55887   2 
   2   1   0 29.1120 6.84988   4 
   2   1   0 43.4848 8.93305   1 
   3   1   0 1092.81 47.9270   1 
   3   1   0 1082.41 47.4069   2 
   4   1   0 327.400 31.3747   2 
   4   1   0 345.958 26.0070   1 
   4   1   0 345.777 24.4379   4 
   5   1   0 427.760 29.8532   4 
   5   1   0 398.883 31.8058   1 
   6   1   0 486.959 34.2423   4 
   6   1   0 467.476 37.1297   1 
   7   1   0 16.2782 16.8546   1 
   7   1   0 -1.3597 11.2374   4 
   8   1   0 334.809 39.7163   1 
   8   1   0 320.259 35.1231   4 
   8   1   0 308.552 31.9303   3 
   7  -2   0 13.7709 22.5349   3 
   7  -2   0 6.59334 15.4970   1 
   7  -2   0 8.38822 13.2825   4 
   6  -2   0 449.803 38.5315   1 
   6  -2   0 428.443 35.2728   4 
  -6   2   0 360.048 40.4897   1 
   5  -2   0 6.70405 12.0685   1 
  -5   2   0 1.66638 12.9701   1 
   4  -2   0 442.107 32.0665   1 
  -4   2   0 448.150 33.9315   1 
  -4   2   0 463.022 31.6241   2 
   3  -2   0 29.0975 10.6309   2 
   3  -2   0 1.15612 8.27210   1 
  -3   2   0 16.4725 11.0618   2 
  -3   2   0 12.2479 8.81539   1 
   2  -2   0 403.802 30.8466   3 
   2  -2   0 423.317 26.3845   1 
  -2   2   0 369.611 44.5024   2 
  -2   2   0 423.547 27.5240   1 
   1  -2   0 2015.08 73.5049   1 
  -1   2   0 1996.98 77.9759   1 
  -1   2   0 2019.37 77.5374   2 
   0  -2   0 131.746 11.2708   1 
   0  -2   0 121.498 15.7694   3 
   0   2   0 118.023 13.8401   3 
  -1  -2   0 585.783 27.4588   3 
   1   2   0 535.430 26.4899   3 
  -2  -2   0 2564.24 92.5327   3 
   2   2   0 2570.42 87.7145   4 
   2   2   0 2609.75 92.1734   3 
   3   2   0 10.7871 10.2545   2 
   3   2   0 16.7406 7.00052   4 
   3   2   0 10.0693 7.91141   3 
   4   2   0 333.122 25.0073   3 
   4   2   0 357.382 22.7511   4 
   4   2   0 339.500 26.6236   2 
   5   2   0 747.074 41.8534   3 
   5   2   0 748.339 39.7541   4 
   5   2   0 713.526 43.4371   2 
   6   2   0 14.7204 10.6736   2 
   6   2   0 24.5182 11.0481   4 
   6   2   0 18.9107 11.8938   3 
   7   2   0 149.015 30.7192   1 
   7   2   0 155.031 23.4106   4 
   7   2   0 133.461 23.7800   3 
   8   2   0 187.442 29.2920   4 
   8   2   0 146.081 25.4655   1 
   7  -3   0 96.0090 23.1081   1 
   7  -3   0 81.8393 20.0773   4 
   6  -3   0 39.6810 14.6696   1 
   6  -3   0 30.7143 15.2324   4 
   6  -3   0 18.3156 18.6151   3 
  -6   3   0 53.5853 21.2519   1 
   5  -3   0 675.582 57.1806   1 
   5  -3   0 759.356 51.4622   3 
  -5   3   0 698.967 50.0808   1 
  -5   3   0 761.875 45.9760   2 
   4  -3   0 136.039 25.4915   3 
   4  -3   0 159.718 24.3659   1 
  -4   3   0 126.014 26.6143   1 
  -4   3   0 170.114 26.4936   2 
   3  -3   0 1224.05 56.1985   1 
   3  -3   0 1200.80 59.1402   3 
  -3   3   0 1165.40 57.5448   1 
  -3   3   0 1106.97 56.5851   2 
   2  -3   0 20.6628 10.4226   1 
   2  -3   0 14.6076 12.9737   3 
  -2   3   0 13.0508 11.7286   1 
  -2   3   0 29.5865 13.0684   2 
   1  -3   0 479.694 31.0919   3 
   1  -3   0 525.854 28.2234   1 
  -1   3   0 478.851 28.5871   1 
  -1   3   0 494.840 34.7959   3 
   0  -3   0 2402.78 84.0090   1 
   0  -3   0 2428.74 88.5353   3 
   0   3   0 2360.39 89.1858   3 
   0   3   0 2321.16 85.0771   1 
  -1  -3   0 49.9936 10.9515   3 
   1   3   0 61.6835 11.6123   3 
  -2  -3   0 54.2005 11.5505   3 
   2   3   0 65.0039 12.2185   3 
   3   3   0 97.2765 14.1300   3 
   3   3   0 89.3198 10.1749   4 
   4   3   0 489.876 33.4587   2 
   4   3   0 474.252 25.4360   4 
   4   3   0 472.009 30.1081   3 
   5   3   0 74.8597 13.3557   4 
   5   3   0 58.8228 14.8644   3 
   5   3   0 78.1038 19.4493   2 
   6   3   0 436.883 29.7899   4 
   6   3   0 399.555 35.2242   2 
   7   3   0 11.1232 11.4399   3 
   7   3   0 16.5331 14.2215   2 
   7   3   0 41.0360 20.2683   4 
   8   3   0 -13.854 9.72865   4 
   7  -4   0 304.358 33.9375   4 
   7  -4   0 234.723 40.1185   3 
   7  -4   0 206.964 34.2021   1 
   6  -4   0 13.9793 17.9295   3 
   6  -4   0 13.5376 13.3834   4 
   6  -4   0 12.4861 15.3984   1 
  -6   4   0 1.60103 17.4992   1 
   5  -4   0 152.234 28.5632   3 
   5  -4   0 98.5069 22.2106   1 
   5  -4   0 128.079 23.5612   4 
  -5   4   0 63.6682 19.7338   1 
   4  -4   0 252.440 28.4372   1 
   4  -4   0 229.637 32.1189   3 
  -4   4   0 270.753 35.7485   2 
  -4   4   0 279.529 30.8657   1 
   3  -4   0 304.614 26.9388   1 
   3  -4   0 358.494 32.0454   3 
  -3   4   0 298.748 29.2885   1 
  -3   4   0 358.354 33.1569   2 
   2  -4   0 1793.59 74.3247   1 
   2  -4   0 1815.53 77.9914   3 
  -2   4   0 1760.90 76.3386   1 
  -2   4   0 1754.67 81.3591   2 
   1  -4   0 447.617 28.0337   1 
   1  -4   0 434.564 31.5393   3 
  -1   4   0 531.996 38.8751   3 
  -1   4   0 498.369 30.5991   1 
   0  -4   0 2756.40 103.985   3 
   0  -4   0 2672.42 97.9590   1 
   0   4   0 2709.65 99.1559   1 
   0   4   0 2773.92 105.584   3 
  -1  -4   0 3515.84 127.501   3 
   1   4   0 3472.74 126.988   3 
  -2  -4   0 966.364 46.1930   3 
   2   4   0 924.955 43.9958   3 
  -3  -4   0 3880.89 141.355   3 
   3   4   0 3844.35 138.820   3 
   4   4   0 622.660 36.2833   3 
   4   4   0 659.117 29.5350   4 
   5   4   0 8.21740 9.51535   2 
   5   4   0 23.6449 8.18662   4 
   5   4   0 13.4449 9.65443   3 
   6   4   0 317.521 30.1038   3 
   6   4   0 339.788 25.5792   4 
   6   4   0 342.768 31.8956   2 
   7   4   0 26.8800 11.5622   4 
   7   4   0 39.1374 16.0207   2 
   8   4   0 41.2072 14.5052   4 
   6  -5   0 -3.4523 16.2334   1 
   6  -5   0 -26.127 17.8797   3 
   6  -5   0 26.8960 14.8922   4 
   5  -5   0 254.401 36.7436   3 
   5  -5   0 225.995 31.8896   4 
   5  -5   0 315.800 33.8554   1 
  -5   5   0 305.738 41.2874   2 
  -5   5   0 308.851 37.0935   1 
   4  -5   0 864.500 51.4557   1 
   4  -5   0 919.507 58.1791   3 
  -4   5   0 846.641 55.5918   2 
  -4   5   0 787.898 53.8812   1 
   3  -5   0 192.740 29.1356   3 
   3  -5   0 201.007 27.1789   1 
  -3   5   0 181.956 27.4905   1 
  -3   5   0 239.499 36.8153   2 
   2  -5   0 733.124 45.1575   3 
   2  -5   0 733.576 42.2626   1 
  -2   5   0 742.690 50.1644   2 
  -2   5   0 747.322 44.1320   1 
   1  -5   0 549.823 36.1101   3 
   1  -5   0 548.255 32.7833   1 
  -1   5   0 516.598 42.5045   3 
  -1   5   0 550.023 34.1133   1 
   0  -5   0 429.775 31.3772   3 
   0  -5   0 407.581 26.0049   1 
   0   5   0 402.783 33.2346   3 
   0   5   0 405.427 26.2550   1 
  -1  -5   0 2050.35 83.8457   3 
   1   5   0 1981.75 83.2342   3 
  -2  -5   0 36.3267 13.0751   3 
   2   5   0 33.0005 11.3982   3 
  -3  -5   0 831.478 45.8154   3 
   3   5   0 827.538 43.5823   3 
  -4  -5   0 238.204 24.6879   3 
   4   5   0 236.716 24.4078   3 
   5   5   0 0.36039 5.85434   4 
   5   5   0 13.3486 10.4390   3 
   5   5   0 6.25113 12.0168   2 
   6   5   0 343.933 22.9123   4 
   6   5   0 311.454 28.6465   3 
   6   5   0 329.254 34.8672   2 
   7   5   0 118.887 17.1614   4 
   7   5   0 103.376 26.5609   2 
   6  -6   0 60.9302 24.6328   1 
   6  -6   0 62.8411 19.8049   4 
  -6   6   0 32.4345 27.4319   2 
   5  -6   0 24.2029 19.7813   3 
   5  -6   0 55.6442 18.2990   4 
   5  -6   0 59.4538 21.1376   1 
  -5   6   0 -0.6694 22.4893   2 
  -5   6   0 10.3996 21.7490   1 
   4  -6   0 10.6434 15.7125   3 
   4  -6   0 -3.9902 14.0642   1 
  -4   6   0 46.2313 23.1257   2 
  -4   6   0 13.8461 14.2664   1 
   3  -6   0 60.0739 20.4446   3 
   3  -6   0 69.5890 21.0304   1 
  -3   6   0 109.321 24.4561   1 
  -3   6   0 58.3500 24.9303   2 
   2  -6   0 267.194 30.3500   3 
   2  -6   0 260.798 27.3800   1 
  -2   6   0 252.877 29.5914   1 
  -2   6   0 208.607 49.8512   2 
   1  -6   0 120.567 21.5200   3 
   1  -6   0 114.691 18.8260   1 
  -1   6   0 134.924 21.6371   1 
  -1   6   0 124.001 26.8660   3 
   0  -6   0 41.2452 14.3848   3 
   0  -6   0 63.6492 12.9961   1 
   0   6   0 64.4976 13.6717   1 
   0   6   0 42.2527 17.3058   3 
  -1  -6   0 487.596 35.7327   3 
   1   6   0 451.514 36.5545   3 
  -2  -6   0 252.523 26.8264   3 
   2   6   0 217.141 27.1451   3 
  -3  -6   0 72.8565 17.9160   3 
   3   6   0 74.7954 17.3030   3 
  -4  -6   0 15.0674 12.1455   3 
   4   6   0 26.3674 12.6744   3 
   5   6   0 -12.995 11.9007   3 
   6   6   0 60.4673 23.7892   2 
   6   6   0 70.9403 15.0409   3 
   7   6   0 125.311 30.1693   2 
   5  -7   0 4.92340 20.1745   1 
   5  -7   0 -23.741 13.1227   4 
  -5   7   0 33.4552 25.7840   2 
   4  -7   0 8.19869 13.6899   4 
   4  -7   0 17.9398 16.0566   1 
   4  -7   0 32.7119 23.0479   3 
  -4   7   0 -9.7304 17.9622   1 
  -4   7   0 5.94471 22.6111   2 
   3  -7   0 18.8449 15.9457   1 
   3  -7   0 65.1722 19.2154   3 
  -3   7   0 46.4601 25.0435   2 
  -3   7   0 20.1758 17.3964   1 
   2  -7   0 144.179 26.8683   3 
  -2   7   0 188.079 29.2396   1 
  -2   7   0 188.440 37.4255   2 
   1  -7   0 53.2737 14.9804   1 
   1  -7   0 74.2744 20.1906   3 
  -1   7   0 98.3567 31.3244   2 
  -1   7   0 94.3267 19.0121   1 
   0  -7   0 112.428 22.8535   3 
   0   7   0 103.308 25.0398   3 
   0   7   0 105.472 18.4692   1 
  -1  -7   0 138.877 25.0002   3 
   1   7   0 95.8763 22.1558   3 
  -2  -7   0 530.413 40.0600   3 
   2   7   0 509.980 40.4364   3 
  -3  -7   0 28.9870 14.7954   3 
   3   7   0 31.1496 14.2234   3 
  -4  -7   0 84.0792 22.1685   3 
   4   7   0 78.9664 18.2020   3 
   5   7   0 -3.1199 13.0431   3 
   6   7   0 35.7006 17.0367   3 
   6   7   0 -2.5804 19.1497   2 
   7   7   0 -9.3283 15.0475   3 
   7   7   0 -7.6088 19.7282   2 
   4  -8   0 113.707 22.3740   4 
  -4   8   0 93.0890 43.5735   2 
   3  -8   0 27.7735 23.9039   3 
   3  -8   0 10.4389 13.5018   4 
   3  -8   0 42.0599 18.0156   1 
  -3   8   0 46.0554 23.3437   1 
  -3   8   0 57.4868 27.9548   2 
   2  -8   0 113.188 21.3279   1 
   2  -8   0 133.549 21.8812   4 
  -2   8   0 195.438 39.3953   2 
  -2   8   0 125.185 28.4031   1 
   1  -8   0 352.805 34.9767   3 
   1  -8   0 319.537 26.6664   4 
  -1   8   0 282.524 46.4183   2 
  -1   8   0 321.079 35.2478   1 
   0  -8   0 -0.1630 7.82020   4 
   0  -8   0 2.05966 12.7766   3 
   0   8   0 16.5799 13.0005   1 
   0   8   0 36.6757 20.9661   3 
  -1  -8   0 406.380 37.9871   3 
   1   8   0 362.121 40.1026   3 
  -2  -8   0 823.301 54.8492   3 
   2   8   0 856.652 55.5490   3 
  -3  -8   0 122.761 26.0066   3 
   3   8   0 157.194 28.3506   3 
  -4  -8   0 168.111 29.4929   3 
   4   8   0 173.166 28.5776   3 
  -5  -8   0 53.3252 16.3888   3 
   5   8   0 18.0089 16.0952   3 
   6   8   0 18.1141 15.5655   3 
   6   8   0 38.4479 24.1180   2 
   3  -9   0 149.558 23.7599   4 
   3  -9   0 144.573 39.5526   1 
  -3   9   0 120.805 43.0506   2 
   2  -9   0 179.369 28.5471   1 
   2  -9   0 226.410 40.0323   4 
  -2   9   0 241.118 38.5287   1 
  -2   9   0 258.003 46.3671   2 
   1  -9   0 343.956 42.1511   3 
   1  -9   0 359.471 34.6968   1 
   1  -9   0 383.326 28.3645   4 
  -1   9   0 516.242 44.2976   1 
  -1   9   0 278.575 48.5869   2 
   0  -9   0 36.2767 22.2925   3 
   0   9   0 10.6980 21.4570   3 
  -1  -9   0 79.8038 22.3137   3 
   1   9   0 91.7216 26.7402   3 
  -2  -9   0 344.336 37.8767   3 
   2   9   0 372.526 41.7642   3 
  -3  -9   0 46.4066 17.8411   3 
   3   9   0 1.90596 17.4944   3 
  -4  -9   0 100.105 24.8993   3 
   4   9   0 109.593 26.3536   3 
  -5  -9   0 -6.2081 17.9958   3 
   5   9   0 14.2835 18.8112   3 
   1 -10   0 1.15213 13.4332   4 
  -1  10   0 -44.070 21.2431   1 
   1  10   0 -6.5128 24.3069   3 
  -2 -10   0 49.2593 21.9100   3 
   2  10   0 41.9555 27.3034   3 
  -3 -10   0 22.6870 20.4520   3 
   3  10   0 3.15203 20.2393   3 
   2  10  -1 31.1340 27.3300   3 
   1  10  -1 69.8921 29.5380   3 
   4   9  -1 54.7842 24.5314   3 
  -4  -9   1 13.7399 23.1125   3 
   3   9  -1 495.862 47.4087   3 
  -3  -9   1 346.108 41.1042   3 
   2   9  -1 91.5804 27.2036   3 
  -2  -9   1 37.1215 21.4265   3 
   1   9  -1 -36.330 20.2600   3 
  -1  -9   1 11.1096 18.4142   3 
   0   9  -1 74.8908 31.7002   3 
   0   9  -1 143.307 36.5609   2 
   0  -9   1 83.5143 14.2257   4 
   0  -9   1 78.2030 25.6305   3 
  -1   9  -1 223.205 68.1809   2 
   1  -9   1 122.292 18.7119   4 
  -2   9  -1 126.503 33.4373   1 
   2  -9   1 131.422 26.4983   1 
   2  -9   1 157.702 24.1571   4 
   6   8  -1 40.6817 24.9218   3 
   5   8  -1 158.240 27.7720   3 
  -5  -8   1 160.908 28.9806   3 
   4   8  -1 -1.2868 16.0896   3 
  -4  -8   1 8.60839 16.2623   3 
   3   8  -1 412.748 41.2080   3 
  -3  -8   1 380.539 38.1612   3 
   2   8  -1 40.2268 19.6624   3 
  -2  -8   1 22.1173 15.4703   3 
   1   8  -1 34.8989 17.7276   3 
  -1  -8   1 -17.073 11.2880   3 
   0   8  -1 357.259 46.5237   2 
   0   8  -1 287.105 41.5597   3 
   0  -8   1 374.517 39.6497   3 
   0  -8   1 294.740 21.9863   4 
  -1   8  -1 85.7177 21.8547   1 
  -1   8  -1 114.041 31.6766   3 
  -1   8  -1 90.3541 28.5250   2 
   1  -8   1 89.5214 19.6266   1 
  -2   8  -1 -13.949 36.1997   2 
  -2   8  -1 32.3056 20.3762   1 
   2  -8   1 53.6825 17.7885   1 
   2  -8   1 23.6231 16.5806   3 
  -3   8  -1 204.715 37.3114   1 
  -3   8  -1 205.338 45.3045   2 
   3  -8   1 184.315 31.0823   1 
   6   7  -1 -9.7029 13.8495   3 
   5   7  -1 -4.4127 13.9282   3 
   4   7  -1 26.8482 15.9310   3 
  -4  -7   1 27.2918 17.3822   3 
   3   7  -1 56.8549 21.6123   3 
  -3  -7   1 32.7239 16.9745   3 
   2   7  -1 143.510 27.1061   3 
  -2  -7   1 145.399 25.0331   3 
   1   7  -1 57.9320 25.3691   3 
  -1  -7   1 58.1722 18.0174   3 
   0   7  -1 17.2885 12.6576   1 
   0   7  -1 31.8314 19.2971   3 
   0  -7   1 13.3294 13.5794   3 
   0  -7   1 19.5421 8.78313   4 
  -1   7  -1 121.565 31.3611   3 
  -1   7  -1 122.566 29.5916   2 
  -1   7  -1 118.070 21.7067   1 
   1  -7   1 127.619 24.8393   3 
   1  -7   1 140.440 20.4961   1 
  -2   7  -1 237.954 32.2254   1 
  -2   7  -1 152.551 34.4680   2 
   2  -7   1 172.159 28.2602   3 
   2  -7   1 241.074 28.0284   1 
  -3   7  -1 157.990 35.2657   2 
  -3   7  -1 200.059 33.6618   1 
   3  -7   1 182.334 29.0391   1 
  -4   7  -1 -22.550 21.7650   1 
  -4   7  -1 -34.954 21.4761   2 
   4  -7   1 9.89479 17.0133   1 
   4  -7   1 -9.6844 22.9481   3 
   7   6  -1 53.4761 21.3701   2 
   7   6  -1 38.8749 18.9594   3 
   6   6  -1 94.8075 24.8125   2 
   5   6  -1 31.0930 15.3571   3 
   4   6  -1 77.5417 18.0751   3 
  -4  -6   1 74.7243 20.8252   3 
   3   6  -1 36.4189 15.8571   3 
  -3  -6   1 53.3453 17.4258   3 
   2   6  -1 212.882 28.9551   3 
   1   6  -1 20.2159 13.6252   3 
  -1  -6   1 32.5150 16.3428   3 
   0   6  -1 50.2676 18.3665   3 
   0  -6   1 55.6520 17.8058   3 
  -1   6  -1 128.224 29.7730   2 
  -1   6  -1 172.817 26.0183   1 
  -1   6  -1 164.966 32.1116   3 
   1  -6   1 153.476 21.2405   1 
   1  -6   1 155.292 25.6545   3 
  -2   6  -1 56.5789 22.1035   2 
  -2   6  -1 82.5095 17.1534   1 
   2  -6   1 40.6732 16.2057   1 
   2  -6   1 48.4253 16.9525   3 
  -3   6  -1 163.281 26.7457   1 
  -3   6  -1 226.240 40.0364   2 
   3  -6   1 253.868 34.3798   3 
   3  -6   1 195.423 27.9191   1 
  -4   6  -1 37.5348 23.6499   2 
  -4   6  -1 25.0630 17.0983   1 
   4  -6   1 18.1419 19.3721   3 
   4  -6   1 3.00662 15.7783   1 
  -5   6  -1 26.9722 22.6822   2 
   5  -6   1 -22.815 16.3812   1 
   5  -6   1 -5.6444 21.6713   3 
   7   5  -1 95.5124 19.9720   3 
   7   5  -1 102.282 25.0266   2 
   7   5  -1 46.8735 13.0870   4 
   6   5  -1 34.9702 15.6563   3 
   6   5  -1 35.3984 9.55968   4 
   6   5  -1 46.1368 17.1976   2 
   5   5  -1 284.659 18.6356   4 
   5   5  -1 293.736 29.8980   3 
   4   5  -1 887.908 49.1545   3 
  -4  -5   1 835.277 50.0316   3 
   3   5  -1 2.49675 11.9572   3 
  -3  -5   1 9.84286 11.3881   3 
   2   5  -1 1327.85 61.6352   3 
  -2  -5   1 1200.67 62.0283   3 
   1   5  -1 1835.97 80.7015   3 
  -1  -5   1 1888.13 81.6949   3 
   0   5  -1 588.822 41.3208   3 
   0  -5   1 576.216 38.0861   3 
  -1   5  -1 866.151 54.4662   3 
  -1   5  -1 812.434 45.5722   1 
  -1   5  -1 906.159 57.5003   2 
   1  -5   1 888.425 45.0486   1 
   1  -5   1 841.834 49.1020   3 
  -2   5  -1 73.9336 17.7022   1 
  -2   5  -1 58.3604 18.0922   2 
   2  -5   1 68.6138 17.0617   1 
   2  -5   1 37.0596 16.6664   3 
  -3   5  -1 644.803 51.1882   2 
  -3   5  -1 654.211 46.2927   1 
   3  -5   1 717.024 47.4180   3 
   3  -5   1 707.380 45.0245   1 
  -4   5  -1 71.0893 18.8620   1 
  -4   5  -1 73.2519 25.0042   2 
   4  -5   1 90.9958 24.2920   3 
   4  -5   1 78.8833 21.5666   1 
  -5   5  -1 149.838 37.1164   2 
  -5   5  -1 189.754 29.8108   1 
   5  -5   1 61.4661 22.3842   1 
   5  -5   1 136.600 27.2434   3 
  -6   5  -1 215.401 37.8703   2 
   6  -5   1 301.186 43.3806   3 
   6  -5   1 233.930 42.1734   1 
   8   4  -1 59.5867 14.4506   4 
   8   4  -1 8.35644 15.3406   3 
   7   4  -1 265.196 23.6097   4 
   7   4  -1 290.659 30.8261   3 
   6   4  -1 36.1429 17.0188   2 
   6   4  -1 39.3641 9.56616   4 
   6   4  -1 41.9927 15.1157   3 
   5   4  -1 233.823 26.2263   2 
   5   4  -1 229.033 25.3644   3 
   5   4  -1 222.239 18.5187   4 
   4   4  -1 2254.99 93.5730   3 
   4   4  -1 2274.82 90.5690   4 
   3   4  -1 176.327 21.4284   3 
  -3  -4   1 177.278 21.9174   3 
   2   4  -1 3219.50 119.122   3 
  -2  -4   1 3118.25 121.131   3 
   1   4  -1 457.800 30.6893   3 
  -1  -4   1 462.988 21.0711   4 
  -1  -4   1 478.536 31.5083   3 
   0   4  -1 1787.79 75.9224   3 
   0  -4   1 1744.28 74.4214   3 
  -1   4  -1 1206.03 60.9942   3 
  -1   4  -1 1231.99 64.3705   2 
  -1   4  -1 1157.94 55.0605   1 
   1  -4   1 1220.60 57.8513   3 
   1  -4   1 1246.19 53.8965   1 
  -2   4  -1 51.1612 15.4112   1 
  -2   4  -1 71.5417 19.9127   2 
   2  -4   1 99.2273 18.0800   1 
   2  -4   1 66.7657 16.6263   3 
  -3   4  -1 939.304 57.2768   2 
   3  -4   1 869.689 52.4138   3 
   3  -4   1 900.619 50.0538   1 
  -4   4  -1 310.857 32.3163   1 
  -4   4  -1 271.712 34.4435   2 
   4  -4   1 344.160 34.7288   3 
   4  -4   1 358.031 36.6527   1 
  -5   4  -1 61.8277 21.8796   2 
  -5   4  -1 44.2107 18.3717   1 
   5  -4   1 67.8523 17.3369   1 
   5  -4   1 50.2699 20.0998   3 
  -6   4  -1 328.029 46.2990   1 
  -6   4  -1 337.084 40.0287   2 
   6  -4   1 335.904 38.9716   1 
   6  -4   1 274.315 38.5397   3 
   8   3  -1 7.39984 12.7192   3 
   8   3  -1 1.74444 12.2849   4 
   7   3  -1 339.735 55.8901   3 
   6   3  -1 1.79377 8.81215   4 
   6   3  -1 1.74919 13.8805   2 
   6   3  -1 11.8320 10.4007   3 
   5   3  -1 322.137 28.3584   2 
   5   3  -1 355.156 23.8301   4 
   5   3  -1 361.772 30.5042   3 
   4   3  -1 356.854 21.6604   4 
   4   3  -1 361.634 28.9864   3 
   3   3  -1 102.458 16.6536   3 
   3   3  -1 98.4862 10.3832   4 
  -3  -3   1 111.621 17.7339   3 
   2   3  -1 202.944 20.3369   3 
   2   3  -1 196.308 11.6374   4 
  -2  -3   1 176.398 19.7454   3 
   1   3  -1 147.715 18.6536   3 
  -1  -3   1 146.868 19.3998   3 
  -1  -3   1 131.824 10.2266   4 
   0   3  -1 369.616 28.5218   3 
   0  -3   1 340.435 26.7179   3 
  -1   3  -1 421.551 32.0947   3 
  -1   3  -1 371.351 32.6103   2 
  -1   3  -1 328.846 24.9329   1 
   1  -3   1 370.872 28.0741   3 
   1  -3   1 350.229 24.4082   1 
  -2   3  -1 441.222 34.4573   2 
  -2   3  -1 383.697 28.2397   1 
   2  -3   1 366.926 27.4211   1 
   2  -3   1 389.659 29.1546   3 
  -3   3  -1 247.136 29.0988   2 
  -3   3  -1 231.400 25.2610   1 
   3  -3   1 240.403 26.9742   3 
   3  -3   1 247.978 24.5771   1 
  -4   3  -1 1630.57 79.6717   2 
  -4   3  -1 1617.33 79.4315   1 
   4  -3   1 1713.36 76.9532   1 
   4  -3   1 1590.47 76.4344   3 
  -5   3  -1 -10.963 15.6235   2 
  -5   3  -1 -4.5001 10.2540   1 
   5  -3   1 15.8796 15.0535   3 
   5  -3   1 10.6374 14.8167   1 
  -6   3  -1 453.293 41.1783   2 
   6  -3   1 484.906 42.9563   1 
   6  -3   1 444.702 42.5391   3 
   7  -3   1 166.988 32.3487   4 
   7  -3   1 63.9402 49.5633   3 
   8   2  -1 -4.1511 11.4655   4 
   8   2  -1 -0.1933 13.5004   3 
   7   2  -1 -23.836 7.85613   4 
   7   2  -1 -4.9518 11.6073   3 
   6   2  -1 478.645 36.7508   3 
   6   2  -1 467.524 32.8387   4 
   5   2  -1 177.962 24.9403   3 
   5   2  -1 190.716 19.1422   4 
   4   2  -1 565.331 34.8382   3 
   4   2  -1 539.420 31.8961   2 
   4   2  -1 524.701 29.2556   4 
   3   2  -1 170.943 19.4262   3 
   3   2  -1 191.513 14.8164   4 
   2   2  -1 10.7843 8.51751   3 
   2   2  -1 7.60052 4.84665   4 
  -2  -2   1 6.50121 8.48975   3 
  -2  -2   1 9.63087 5.37398   4 
   1   2  -1 459.377 26.2705   3 
   1   2  -1 527.126 20.4552   4 
  -1  -2   1 492.772 27.7170   3 
   0   2  -1 703.985 34.0586   3 
   0  -2   1 727.573 34.5647   3 
  -1   2  -1 -5.2174 9.38542   3 
  -1   2  -1 6.63260 10.5961   2 
  -1   2  -1 8.46439 8.00527   1 
   1  -2   1 10.1684 9.48130   3 
   1  -2   1 2.33483 7.60684   1 
  -2   2  -1 1301.72 57.3762   1 
  -2   2  -1 1295.85 60.9680   2 
   2  -2   1 1247.80 57.1939   3 
   2  -2   1 1337.93 57.3985   1 
   2  -2   1 1288.23 60.7147   2 
  -3   2  -1 400.009 30.5434   1 
  -3   2  -1 393.506 31.7464   2 
   3  -2   1 436.077 32.7328   2 
   3  -2   1 410.536 30.9260   3 
   3  -2   1 398.415 29.7952   1 
  -4   2  -1 105.437 22.7264   2 
  -4   2  -1 77.8297 17.5165   1 
   4  -2   1 60.6825 17.2360   1 
   4  -2   1 58.6254 16.7374   3 
   4  -2   1 78.2310 20.0403   2 
  -5   2  -1 405.301 36.1826   2 
  -5   2  -1 398.451 37.1581   1 
   5  -2   1 423.779 36.9768   3 
   5  -2   1 390.272 35.5634   1 
   5  -2   1 444.848 36.6616   2 
  -6   2  -1 73.0143 22.3089   1 
   6  -2   1 61.4356 19.1090   1 
   6  -2   1 41.1114 18.1855   2 
   6  -2   1 73.2098 20.7565   3 
   7  -2   1 -1.8949 13.3477   4 
   7  -2   1 5.57545 17.6315   1 
   7  -2   1 -9.1774 17.4934   3 
   8   1  -1 16.4602 14.0422   3 
   8   1  -1 -8.2280 11.0304   4 
   7   1  -1 308.436 29.7311   4 
   6   1  -1 329.582 28.8982   4 
   5   1  -1 521.886 33.2712   4 
   4   1  -1 1594.48 65.4191   4 
   3   1  -1 230.826 21.0100   3 
   3   1  -1 249.983 18.9188   4 
   2   1  -1 87.6666 13.3244   3 
   2   1  -1 93.7408 10.2612   4 
  -2  -1   1 81.4881 10.4394   4 
   1   1  -1 8823.18 300.645   3 
   1   1  -1 9379.98 296.394   4 
  -1  -1   1 9494.07 296.980   4 
  -1  -1   1 8889.94 300.971   3 
   0   1  -1 2441.49 87.8711   2 
   0   1  -1 2403.30 84.1325   3 
   0  -1   1 2421.63 84.6092   3 
  -1   1  -1 151.818 19.4178   2 
  -1   1  -1 114.916 15.6958   1 
  -1   1  -1 141.454 15.5948   3 
   1  -1   1 123.895 14.9957   1 
   1  -1   1 152.824 18.3359   3 
   1  -1   1 144.082 19.0040   2 
  -2   1  -1 2349.80 90.0051   1 
  -2   1  -1 2349.65 91.4007   2 
   2  -1   1 2425.89 92.4054   2 
   2  -1   1 2399.73 93.1993   1 
   2  -1   1 2346.54 88.4067   3 
  -3   1  -1 -0.8521 11.8448   2 
  -3   1  -1 19.9368 10.8096   1 
   3  -1   1 4.15805 11.1537   2 
   3  -1   1 8.21175 13.1301   3 
   3  -1   1 -6.6575 9.42746   1 
  -4   1  -1 617.825 40.1320   1 
  -4   1  -1 631.932 38.6644   2 
   4  -1   1 595.182 39.7448   2 
   4  -1   1 583.849 38.7536   1 
  -5   1  -1 350.280 30.5954   2 
  -5   1  -1 382.511 35.1240   1 
   5  -1   1 338.283 31.4085   2 
   5  -1   1 315.449 31.4834   1 
   6  -1   1 899.638 55.8621   1 
   6  -1   1 856.194 55.1456   3 
   7  -1   1 74.9188 21.5740   1 
   7  -1   1 41.0403 24.3684   3 
   7  -1   1 82.1265 21.2616   4 
   8  -1   1 1.08196 13.2699   4 
   8  -1   1 55.0065 28.0699   3 
   8  -1   1 -15.639 18.4751   1 
   8   0  -1 55.7142 17.8428   4 
   8   0  -1 11.0378 17.0198   1 
   7   0  -1 448.883 37.7120   1 
   7   0  -1 381.653 34.5140   4 
   6   0  -1 809.566 49.2299   1 
   6   0  -1 872.711 49.2783   4 
   5   0  -1 24.3507 13.6764   1 
   5   0  -1 29.2835 11.6718   4 
  -5   0   1 26.6576 14.5692   1 
   4   0  -1 1280.08 56.9820   4 
   4   0  -1 1218.15 56.5538   1 
  -4   0   1 1372.16 59.3812   1 
   3   0  -1 1204.83 50.8312   4 
   3   0  -1 1183.77 50.3825   1 
  -3   0   1 1192.49 51.4582   1 
   2   0  -1 2045.52 75.6580   4 
  -2   0   1 2158.93 76.5716   4 
   0   0  -1 176.118 13.1422   3 
   0   0  -1 204.409 13.1688   2 
   0   0   1 184.535 13.0438   3 
   0   0   1 221.804 12.7436   2 
  -1   0  -1 8276.18 274.782   2 
  -1   0  -1 8426.22 271.318   3 
   1   0   1 8217.42 273.259   1 
   1   0   1 8391.31 275.245   2 
  -2   0  -1 2656.51 98.5418   1 
  -2   0  -1 2699.05 99.2047   2 
   2   0   1 2774.46 100.053   2 
   2   0   1 2740.09 99.0891   1 
  -3   0  -1 26.8468 12.1520   1 
  -3   0  -1 26.0685 11.7946   2 
   3   0   1 46.2012 13.6645   1 
   3   0   1 56.6222 14.8053   2 
  -4   0  -1 2598.47 100.638   2 
   4   0   1 2529.51 102.543   1 
   4   0   1 2565.16 102.626   2 
  -5   0  -1 564.709 37.2654   2 
   5   0   1 610.564 39.7072   2 
   5   0   1 560.083 40.1795   1 
  -6   0  -1 460.429 35.6418   2 
   6   0   1 476.364 37.2607   2 
   7   0   1 81.3629 22.5513   1 
   7   0   1 103.156 21.8583   4 
   8   0   1 352.169 46.2024   3 
   8   0   1 269.567 54.2405   4 
   8   0   1 254.380 38.0134   1 
   8  -1  -1 71.8929 22.7814   1 
   8  -1  -1 107.428 26.5379   4 
   7  -1  -1 682.633 47.8218   1 
   7  -1  -1 689.019 47.5538   4 
   6  -1  -1 299.479 29.8676   4 
   6  -1  -1 288.725 29.5344   1 
  -6   1   1 376.995 43.2171   1 
   5  -1  -1 21.9284 12.7334   1 
   5  -1  -1 -0.1324 7.52980   4 
  -5   1   1 -0.6228 11.5373   1 
   4  -1  -1 462.493 29.7320   4 
   4  -1  -1 426.022 30.5751   1 
  -4   1   1 454.738 32.3250   1 
   3  -1  -1 3318.55 119.341   4 
   3  -1  -1 3255.72 119.293   1 
  -3   1   1 3302.09 120.972   1 
   2  -1  -1 133.644 13.7227   4 
   2  -1  -1 153.745 14.5320   1 
   1  -1  -1 4486.62 150.553   1 
   1  -1  -1 4621.14 151.149   4 
  -1   1   1 4533.02 150.895   1 
  -1   1   1 4510.41 150.977   4 
   0  -1  -1 2195.82 70.6057   4 
   0   1   1 2130.14 70.6530   4 
   0   1   1 2060.85 72.0108   2 
  -1  -1  -1 248.600 16.7714   2 
   1   1   1 243.844 16.6594   2 
  -2  -1  -1 1115.07 47.1436   2 
   2   1   1 1143.27 48.0088   2 
  -3  -1  -1 27.3805 12.5689   2 
   3   1   1 3.81156 9.93818   1 
   3   1   1 12.2203 11.6562   2 
  -4  -1  -1 2200.37 87.8102   2 
   4   1   1 2204.04 89.3960   2 
   4   1   1 2177.32 89.5945   1 
  -5  -1  -1 440.281 32.4264   2 
   5   1   1 414.339 32.9075   2 
   5   1   1 414.830 33.2182   1 
   6   1   1 6.91234 14.6882   2 
   6   1   1 43.9593 16.4279   1 
   6   1   1 17.4343 12.5556   4 
   7   1   1 504.421 43.4732   1 
   7   1   1 550.276 41.1638   4 
   8   1   1 313.216 38.7631   4 
   8   1   1 325.346 39.3232   1 
   7  -2  -1 49.0940 17.7419   4 
   7  -2  -1 41.2045 17.8879   1 
  -7   2   1 118.679 44.1236   1 
   6  -2  -1 91.0690 21.1477   1 
   6  -2  -1 75.8581 18.9301   4 
  -6   2   1 99.8982 23.8310   1 
   5  -2  -1 0.98159 11.1660   1 
   5  -2  -1 5.78778 10.5428   4 
  -5   2   1 29.6524 13.8100   1 
   4  -2  -1 166.718 22.0369   4 
   4  -2  -1 161.205 22.3555   1 
  -4   2   1 143.916 22.8558   1 
   3  -2  -1 5.25100 7.30493   4 
   3  -2  -1 7.63032 8.16667   1 
  -3   2   1 23.7046 11.2395   1 
   2  -2  -1 153.188 16.1850   1 
   2  -2  -1 125.726 14.6862   4 
  -2   2   1 148.689 17.4823   1 
   1  -2  -1 162.381 13.2129   4 
   1  -2  -1 174.980 14.4790   1 
  -1   2   1 159.764 14.7547   1 
   0  -2  -1 47.6782 5.55117   4 
   0  -2  -1 40.2663 8.79754   3 
   0  -2  -1 68.3559 8.45002   1 
   0   2   1 39.0867 5.33423   4 
   0   2   1 58.1663 8.42700   1 
   2   2   1 132.147 18.6595   2 
   3   2   1 603.979 34.8679   2 
   4   2   1 466.637 32.4462   2 
   4   2   1 464.619 31.4197   1 
   5   2   1 89.4935 19.8906   1 
   5   2   1 126.868 23.3468   2 
   6   2   1 0.56088 11.5284   1 
   6   2   1 11.1997 13.2348   2 
   6   2   1 7.39410 9.72977   4 
   7   2   1 117.625 22.5125   4 
   7   2   1 124.885 26.3562   1 
   8   2   1 -34.698 16.0481   1 
   8   2   1 -27.830 10.0938   4 
   7  -3  -1 25.7991 16.0743   1 
   7  -3  -1 5.96641 13.3552   4 
  -7   3   1 -45.854 23.7317   1 
   6  -3  -1 205.503 30.3079   4 
   6  -3  -1 218.898 30.5014   1 
  -6   3   1 187.934 31.7610   1 
   5  -3  -1 31.8215 14.8969   1 
   5  -3  -1 77.6618 19.7837   4 
  -5   3   1 39.7121 18.6650   1 
   4  -3  -1 906.186 48.3132   1 
   4  -3  -1 852.344 47.2746   4 
  -4   3   1 875.955 50.3363   1 
   3  -3  -1 216.688 20.4287   4 
   3  -3  -1 259.677 23.1647   1 
  -3   3   1 213.956 22.0650   1 
   2  -3  -1 946.365 43.9550   1 
   2  -3  -1 891.211 41.9450   4 
  -2   3   1 922.136 46.2199   2 
  -2   3   1 953.095 45.8810   1 
   1  -3  -1 2140.61 84.9880   3 
   1  -3  -1 2163.69 79.0218   4 
  -1   3   1 2284.85 82.3755   1 
   0  -3  -1 4396.99 151.506   4 
   0  -3  -1 4684.30 163.444   3 
   0  -3  -1 4620.25 154.672   1 
   0   3   1 4706.56 159.694   3 
   1   3   1 53.9770 10.2673   3 
   3   3   1 75.9318 18.6847   2 
   4   3   1 29.4637 13.6553   2 
   4   3   1 44.1366 9.30895   4 
   5   3   1 390.945 33.7922   2 
   5   3   1 395.565 32.2542   1 
   5   3   1 399.903 27.0740   4 
   6   3   1 20.4605 15.0472   2 
   6   3   1 13.6037 10.1955   4 
   7   3   1 38.6079 15.4352   4 
   7   3   1 58.5987 17.6516   2 
   7   3   1 33.4555 17.2225   1 
   8   3   1 104.188 22.8236   4 
   8   3   1 95.7169 24.7524   1 
   7  -4  -1 28.6401 17.2182   4 
   7  -4  -1 -20.686 26.3318   3 
   6  -4  -1 315.172 33.5071   4 
   6  -4  -1 359.409 36.9120   1 
   6  -4  -1 428.942 45.2652   3 
   5  -4  -1 766.135 55.6606   3 
   5  -4  -1 781.720 48.5628   1 
   5  -4  -1 694.408 45.5497   4 
  -5   4   1 730.420 52.0117   1 
   4  -4  -1 29.8551 16.8294   3 
   4  -4  -1 39.1708 12.7931   4 
   4  -4  -1 35.9545 14.0907   1 
  -4   4   1 41.4213 18.1481   1 
  -4   4   1 23.7964 17.0738   2 
   3  -4  -1 1664.79 79.3407   3 
   3  -4  -1 1747.81 74.9436   1 
   3  -4  -1 1742.99 73.7071   4 
  -3   4   1 1759.27 77.5385   2 
  -3   4   1 1657.84 77.3486   1 
   2  -4  -1 1011.30 54.6060   3 
   2  -4  -1 1120.11 51.4097   1 
   2  -4  -1 1087.56 49.5801   4 
  -2   4   1 1177.84 54.2548   1 
  -2   4   1 1131.62 55.5968   2 
   1  -4  -1 2876.59 104.839   4 
   1  -4  -1 3011.90 112.804   3 
   1  -4  -1 3002.86 107.945   1 
  -1   4   1 2937.26 109.233   1 
   0  -4  -1 1042.77 47.9887   3 
   0  -4  -1 982.495 39.1048   4 
   0  -4  -1 1060.13 43.7158   1 
   0   4   1 1011.26 44.4228   1 
   0   4   1 1030.49 50.7996   3 
  -1  -4  -1 61.1027 12.9690   3 
   1   4   1 47.7217 10.7700   1 
   1   4   1 38.1898 12.6532   3 
  -2  -4  -1 3986.05 137.820   3 
   2   4   1 3832.48 136.019   3 
  -3  -4  -1 283.536 21.5021   3 
   3   4   1 270.253 22.3654   3 
   4   4   1 385.804 31.4670   2 
   4   4   1 376.550 21.5773   4 
   5   4   1 759.977 47.2152   2 
   5   4   1 733.558 36.8306   4 
   6   4   1 260.942 22.7349   4 
   6   4   1 248.064 34.8345   2 
   7   4   1 195.828 31.8792   2 
   7   4   1 151.264 20.7949   4 
   8   4   1 235.751 36.2080   2 
   8   4   1 230.052 24.9650   4 
   6  -5  -1 363.460 37.5823   4 
   6  -5  -1 333.863 37.2698   1 
   6  -5  -1 243.689 40.2619   3 
  -6   5   1 261.448 44.5942   1 
   5  -5  -1 822.389 52.9447   1 
   5  -5  -1 885.060 60.2821   3 
   5  -5  -1 801.417 50.4769   4 
  -5   5   1 746.223 54.3480   1 
   4  -5  -1 482.362 41.5937   3 
   4  -5  -1 467.438 45.2395   1 
   4  -5  -1 429.072 34.2802   4 
  -4   5   1 469.841 39.6552   2 
  -4   5   1 458.904 39.0064   1 
   3  -5  -1 1184.80 58.9830   1 
   3  -5  -1 1171.08 57.4272   4 
   3  -5  -1 1200.13 64.0731   3 
  -3   5   1 1256.43 65.8180   2 
  -3   5   1 1220.89 63.8072   1 
   2  -5  -1 248.576 23.7090   1 
   2  -5  -1 201.144 26.4093   3 
   2  -5  -1 204.720 19.7342   4 
  -2   5   1 222.400 27.6179   2 
  -2   5   1 193.632 23.9338   1 
   1  -5  -1 82.1183 13.6311   1 
   1  -5  -1 68.0451 12.0707   4 
   1  -5  -1 45.0668 13.7285   3 
  -1   5   1 62.9288 13.5284   1 
   0  -5  -1 1092.10 47.0451   1 
   0  -5  -1 1050.20 41.8197   4 
   0  -5  -1 1086.79 52.0892   3 
   0   5   1 1037.93 48.0881   1 
   0   5   1 1110.18 56.2649   3 
  -1  -5  -1 80.6760 14.9312   3 
   1   5   1 74.4541 16.4705   3 
   1   5   1 92.0891 13.5641   1 
  -2  -5  -1 703.316 38.2618   3 
   2   5   1 761.230 39.0637   3 
  -3  -5  -1 165.795 19.1143   3 
   3   5   1 165.960 19.1143   3 
   5   5   1 1108.66 62.5693   2 
   5   5   1 1003.26 44.2019   4 
   6   5   1 444.356 27.2581   4 
   6   5   1 425.783 38.2044   2 
   7   5   1 288.835 35.4130   2 
   7   5   1 300.241 24.5530   4 
   8   5   1 91.1161 26.1413   2 
   8   5   1 122.012 20.0502   4 
   6  -6  -1 5.17510 19.0121   1 
   6  -6  -1 -11.862 24.8410   4 
   5  -6  -1 19.1368 21.8064   3 
   5  -6  -1 14.5312 12.9033   4 
   5  -6  -1 -1.9132 14.3793   1 
  -5   6   1 -22.938 17.8659   1 
   4  -6  -1 8.65943 11.1297   4 
   4  -6  -1 -11.127 10.9842   1 
   4  -6  -1 8.88484 17.2951   3 
  -4   6   1 0.08677 16.4798   1 
  -4   6   1 39.5528 19.4981   2 
   3  -6  -1 42.6942 17.3225   3 
   3  -6  -1 37.2578 16.9292   1 
   3  -6  -1 39.2742 13.1621   4 
  -3   6   1 37.8884 15.9908   1 
  -3   6   1 23.5085 18.7946   2 
   2  -6  -1 1.64704 13.0775   3 
   2  -6  -1 9.55389 13.2247   1 
   2  -6  -1 17.0350 10.0884   4 
  -2   6   1 0.12096 14.7556   2 
  -2   6   1 -0.1017 8.38457   1 
   1  -6  -1 66.9600 12.7494   4 
   1  -6  -1 45.4620 15.4308   3 
   1  -6  -1 107.083 16.8395   1 
  -1   6   1 54.0291 15.0718   1 
   0  -6  -1 454.084 23.2707   4 
   0  -6  -1 452.019 28.8521   1 
   0  -6  -1 465.850 33.8915   3 
   0   6   1 421.561 29.4745   1 
   0   6   1 430.812 38.7870   3 
  -1  -6  -1 77.8061 16.6979   3 
   1   6   1 70.6294 13.4161   1 
   1   6   1 84.0396 18.7520   3 
  -2  -6  -1 251.746 24.5947   3 
   2   6   1 285.258 27.5480   3 
   2   6   1 317.916 22.3270   1 
  -3  -6  -1 508.373 35.4468   3 
   3   6   1 586.805 35.9488   3 
  -4  -6  -1 -6.2786 8.48478   3 
   4   6   1 9.10466 10.2369   3 
   5   6   1 276.349 35.8611   2 
   6   6   1 204.207 35.1477   2 
   7   6   1 108.724 28.4861   2 
   5  -7  -1 10.3405 13.4065   4 
   5  -7  -1 25.8415 19.8140   1 
  -5   7   1 -30.905 23.4074   2 
   4  -7  -1 20.0147 21.6114   3 
   4  -7  -1 27.3285 17.3249   1 
   4  -7  -1 5.62582 9.92554   4 
  -4   7   1 -16.249 14.0002   1 
  -4   7   1 -12.604 20.8548   2 
   3  -7  -1 213.156 24.4470   4 
   3  -7  -1 183.950 25.9703   1 
   3  -7  -1 201.310 31.7880   3 
  -3   7   1 202.031 31.6437   1 
  -3   7   1 191.676 35.9912   2 
   2  -7  -1 59.9428 17.6292   3 
   2  -7  -1 66.2310 14.7911   4 
   2  -7  -1 79.7649 18.4315   1 
  -2   7   1 75.6145 19.8946   1 
  -2   7   1 82.1009 27.2260   2 
   1  -7  -1 215.963 20.4079   4 
   1  -7  -1 212.338 27.3311   3 
   1  -7  -1 232.834 24.9644   1 
  -1   7   1 236.703 25.8226   1 
   0  -7  -1 128.369 17.1777   4 
   0  -7  -1 116.548 22.2477   3 
   0   7   1 110.274 18.7842   1 
   0   7   1 133.895 26.4234   3 
  -1  -7  -1 749.251 45.3966   3 
   1   7   1 699.096 48.0163   3 
   1   7   1 657.281 38.1911   1 
  -2  -7  -1 16.6631 12.2147   3 
   2   7   1 25.3158 15.2571   3 
  -3  -7  -1 129.050 21.4775   3 
   3   7   1 217.420 26.0921   3 
  -4  -7  -1 0.48744 11.7133   3 
   4   7   1 13.1993 13.0589   3 
   5   7   1 8.48341 10.5543   3 
   5   7   1 24.5670 16.3931   2 
   6   7   1 -17.850 16.8330   2 
   7   7   1 20.4275 22.7245   2 
   4  -8  -1 120.618 24.5278   1 
   4  -8  -1 100.131 19.5409   4 
  -4   8   1 130.347 31.4174   2 
   3  -8  -1 110.621 23.7555   1 
   3  -8  -1 100.458 18.7704   4 
   3  -8  -1 106.411 25.5353   3 
  -3   8   1 149.660 31.4213   2 
   2  -8  -1 266.227 25.2574   4 
   2  -8  -1 222.973 33.6931   3 
   2  -8  -1 284.724 30.6643   1 
  -2   8   1 262.812 45.5699   2 
  -2   8   1 223.525 33.9479   1 
   1  -8  -1 87.1688 14.7709   4 
   1  -8  -1 56.5656 18.1811   1 
   1  -8  -1 62.1863 18.7616   3 
  -1   8   1 76.7399 18.9605   1 
   0  -8  -1 149.761 25.4417   3 
   0   8   1 149.753 23.7924   1 
  -1  -8  -1 1032.29 61.3706   3 
   1   8   1 1252.38 68.7269   3 
  -2  -8  -1 474.112 38.3452   3 
   2   8   1 597.815 44.6973   3 
  -3  -8  -1 271.183 30.7467   3 
   3   8   1 312.611 32.9109   3 
  -4  -8  -1 -4.2612 9.40847   3 
   4   8   1 9.02151 15.0472   3 
   5   8   1 96.2079 20.5831   3 
   6   8   1 135.618 36.2736   2 
   3  -9  -1 120.985 26.1901   1 
   3  -9  -1 179.945 25.4934   4 
  -3   9   1 226.512 42.9270   2 
   2  -9  -1 406.096 31.3394   4 
   2  -9  -1 402.496 42.1787   3 
   2  -9  -1 423.993 39.6223   1 
  -2   9   1 389.319 57.1571   2 
  -2   9   1 478.862 57.8478   1 
   1  -9  -1 44.3446 16.6576   1 
   1  -9  -1 31.6597 11.3793   4 
  -1   9   1 58.7190 21.1949   1 
   0  -9  -1 204.659 30.8873   3 
   0   9   1 320.717 34.2660   1 
  -1  -9  -1 213.313 30.6576   3 
   1   9   1 247.570 36.4406   3 
   1   9   1 266.834 28.4532   1 
  -2  -9  -1 65.0887 19.0345   3 
   2   9   1 51.6967 23.0490   3 
  -3  -9  -1 95.8968 24.5534   3 
   3   9   1 221.044 33.2101   3 
  -4  -9  -1 60.0388 17.2888   3 
   4   9   1 5.77170 16.4701   3 
  -5  -9  -1 28.2145 19.0069   3 
   5   9   1 -0.0994 14.5355   3 
   2 -10  -1 11.0937 13.8063   4 
   2 -10  -1 6.38902 16.4082   1 
   1 -10  -1 27.4405 12.4470   4 
  -1  10   1 25.1404 26.3333   2 
  -1  10   1 38.0896 23.2181   1 
   0 -10  -1 -5.4285 18.5106   3 
   0  10   1 92.6443 21.7644   1 
  -1 -10  -1 37.6406 19.6513   3 
   2  10   1 39.7720 24.8373   3 
  -3 -10  -1 26.3791 20.1329   3 
   3  10   1 78.9980 27.0422   3 
  -4 -10  -1 60.6521 19.8742   3 
   4  10   1 104.901 27.4515   3 
   3   9  -2 67.7194 33.9498   3 
   2   9  -2 79.1363 27.1208   3 
   1   9  -2 116.927 36.6855   3 
   0   9  -2 61.5991 30.9026   3 
   0  -9   2 60.3033 14.2292   4 
   1  -9   2 137.717 21.7755   4 
   5   8  -2 10.0972 18.6140   3 
  -5  -8   2 -0.5443 16.3672   3 
   4   8  -2 397.275 42.3130   3 
  -4  -8   2 354.652 42.6086   3 
   3   8  -2 0.99531 18.7141   3 
  -3  -8   2 55.5341 25.1832   3 
   2   8  -2 29.6956 18.6838   3 
   1   8  -2 345.816 42.7443   3 
   1   8  -2 361.858 46.5473   2 
  -1  -8   2 209.105 53.3440   3 
   0   8  -2 70.0046 21.1371   2 
   0   8  -2 47.4153 26.1863   3 
   0  -8   2 32.8381 16.9553   3 
   0  -8   2 22.1229 10.0608   4 
  -1   8  -2 69.7596 30.5031   3 
  -1   8  -2 119.785 33.4886   2 
   1  -8   2 100.871 26.5231   3 
   1  -8   2 110.888 19.0803   4 
  -2   8  -2 216.926 36.2630   1 
  -2   8  -2 220.560 46.6360   2 
   2  -8   2 157.662 25.7283   1 
   3  -8   2 8.16406 19.7451   1 
   6   7  -2 -29.479 14.3031   3 
   5   7  -2 8.05972 16.0349   3 
   4   7  -2 65.8287 19.5958   3 
  -4  -7   2 61.8672 19.7444   3 
   3   7  -2 62.6209 19.8883   3 
  -3  -7   2 40.8535 17.3692   3 
   2   7  -2 49.3665 21.9067   3 
  -2  -7   2 49.7612 19.3814   3 
   1   7  -2 -5.4201 15.1534   2 
   1   7  -2 -10.456 14.7855   3 
  -1  -7   2 3.85424 6.38434   4 
  -1  -7   2 22.5469 17.2567   3 
   0   7  -2 155.082 36.5244   2 
   0   7  -2 226.542 34.6978   3 
   0  -7   2 241.012 35.3838   3 
   0  -7   2 222.165 19.1013   4 
  -1   7  -2 0.92146 14.2501   1 
  -1   7  -2 19.5529 17.5890   2 
  -1   7  -2 40.5495 21.6090   3 
   1  -7   2 7.96229 16.0937   3 
  -2   7  -2 157.129 41.4914   2 
  -2   7  -2 157.552 29.6025   1 
   2  -7   2 107.374 23.0019   1 
  -3   7  -2 -15.269 21.6058   2 
   3  -7   2 21.9362 20.5657   3 
   3  -7   2 -4.7705 14.0559   1 
  -4   7  -2 47.1601 31.6662   2 
   4  -7   2 36.6395 21.0034   1 
   7   6  -2 -18.002 17.6380   3 
   6   6  -2 82.7319 24.7849   3 
   5   6  -2 135.354 25.1258   3 
   4   6  -2 1.25012 13.8277   3 
  -4  -6   2 -5.2443 13.8263   3 
   3   6  -2 136.704 24.7849   3 
  -3  -6   2 145.134 27.3286   3 
   2   6  -2 72.8443 18.9176   3 
  -2  -6   2 68.1506 20.1196   3 
   1   6  -2 117.336 24.6258   3 
  -1  -6   2 123.306 14.1672   4 
  -1  -6   2 108.298 23.7761   3 
   0   6  -2 10.7746 16.1626   3 
   0   6  -2 20.8550 18.3465   2 
   0  -6   2 -2.0998 7.07380   4 
   0  -6   2 7.41836 11.0601   3 
  -1   6  -2 124.565 30.3753   2 
  -1   6  -2 104.656 20.7095   1 
  -1   6  -2 107.566 28.1242   3 
   1  -6   2 105.361 22.2503   3 
  -2   6  -2 254.192 31.4979   1 
  -2   6  -2 244.906 39.5721   3 
  -2   6  -2 251.644 42.5361   2 
   2  -6   2 307.910 33.0673   3 
   2  -6   2 278.003 29.1199   1 
  -3   6  -2 35.6217 21.7532   2 
  -3   6  -2 51.8839 15.6782   1 
   3  -6   2 0.91578 15.1667   3 
   3  -6   2 34.4884 18.3327   1 
  -4   6  -2 27.0471 21.5957   2 
  -4   6  -2 -10.639 17.0689   1 
   4  -6   2 -16.569 15.4912   3 
   4  -6   2 26.1343 16.8057   1 
  -5   6  -2 96.7726 34.9963   2 
   5  -6   2 143.842 37.8843   1 
   7   5  -2 1.97709 9.43999   4 
   7   5  -2 -24.247 15.8198   2 
   7   5  -2 -7.4990 13.9134   3 
   6   5  -2 107.097 25.1671   2 
   6   5  -2 94.1352 21.0918   3 
   6   5  -2 122.836 16.7268   4 
   5   5  -2 326.449 37.7384   3 
   5   5  -2 361.848 21.0645   4 
   4   5  -2 123.828 22.3433   3 
  -4  -5   2 136.695 24.5820   3 
   3   5  -2 313.032 31.7764   3 
  -3  -5   2 311.298 33.2808   3 
   2   5  -2 604.026 41.4614   3 
  -2  -5   2 591.499 42.8125   3 
  -2  -5   2 608.355 27.9735   4 
   1   5  -2 700.873 44.6291   3 
  -1  -5   2 658.328 44.2526   3 
  -1  -5   2 676.107 30.9595   4 
   0   5  -2 1847.20 123.339   2 
   0   5  -2 1846.44 84.1503   3 
   0  -5   2 1834.17 70.2597   4 
   0  -5   2 1651.54 103.721   3 
  -1   5  -2 95.5086 27.4945   2 
  -1   5  -2 56.9631 13.4742   1 
  -1   5  -2 57.2535 18.4763   3 
   1  -5   2 65.4625 16.6701   3 
   1  -5   2 73.5631 17.3251   1 
  -2   5  -2 1168.07 70.0070   3 
  -2   5  -2 1146.62 73.6237   2 
   2  -5   2 1147.31 57.8194   1 
   2  -5   2 1127.25 62.3650   3 
  -3   5  -2 487.467 46.1374   2 
  -3   5  -2 384.359 36.2846   1 
   3  -5   2 491.298 43.2023   1 
   3  -5   2 467.913 40.9765   3 
  -4   5  -2 23.6161 24.8169   2 
  -4   5  -2 7.45908 15.4822   1 
   4  -5   2 -5.7536 13.3886   1 
   4  -5   2 8.30559 16.9577   3 
  -5   5  -2 320.229 49.0574   2 
  -5   5  -2 313.805 45.6031   1 
   5  -5   2 291.816 35.0915   1 
  -6   5  -2 -68.105 51.9758   2 
   6  -5   2 7.16939 18.2999   1 
   7   4  -2 17.9684 9.28842   4 
   7   4  -2 11.8059 15.2018   3 
   6   4  -2 93.7579 15.8277   4 
   6   4  -2 58.9975 18.3414   3 
   5   4  -2 605.185 31.3820   4 
   5   4  -2 611.945 43.2226   3 
   4   4  -2 25.7180 7.22239   4 
   4   4  -2 27.1640 13.3145   3 
   3   4  -2 1110.37 55.5322   3 
   3   4  -2 1057.96 42.8488   4 
  -3  -4   2 1101.44 57.8394   3 
  -3  -4   2 1077.87 44.6666   4 
   2   4  -2 329.787 28.5584   3 
  -2  -4   2 309.584 27.9158   3 
  -2  -4   2 303.426 18.0460   4 
   1   4  -2 2193.88 91.6431   3 
  -1  -4   2 2227.79 80.1134   4 
  -1  -4   2 2294.62 93.4039   3 
   0   4  -2 819.924 46.6937   3 
   0   4  -2 814.080 51.8915   2 
   0  -4   2 835.028 37.5105   4 
   0  -4   2 819.763 45.5466   3 
  -1   4  -2 60.6435 13.8514   1 
  -1   4  -2 86.2394 20.5684   3 
  -1   4  -2 67.0784 20.7798   2 
   1  -4   2 65.8761 16.0396   3 
   1  -4   2 75.6424 15.6998   1 
  -2   4  -2 1709.52 79.0725   1 
  -2   4  -2 1741.78 89.7194   2 
  -2   4  -2 1796.52 86.9426   3 
   2  -4   2 1828.52 80.7106   3 
   2  -4   2 1842.37 77.6732   1 
  -3   4  -2 588.397 53.3734   2 
  -3   4  -2 539.466 41.3291   1 
   3  -4   2 591.132 40.1813   1 
   3  -4   2 585.618 42.1844   3 
  -4   4  -2 -15.693 17.7305   2 
  -4   4  -2 14.8066 14.1629   1 
   4  -4   2 22.3294 16.1467   1 
   4  -4   2 4.94770 13.4828   3 
  -5   4  -2 205.425 35.5369   2 
  -5   4  -2 249.949 37.2727   1 
   5  -4   2 200.267 31.1613   3 
   5  -4   2 222.458 33.5255   1 
  -6   4  -2 318.271 39.7584   2 
   6  -4   2 191.597 32.9644   1 
   8   3  -2 17.6656 14.5194   4 
   8   3  -2 35.3708 19.4865   3 
   7   3  -2 30.0410 10.1917   4 
   7   3  -2 29.9278 16.9068   3 
   6   3  -2 52.1831 12.7919   4 
   6   3  -2 34.7311 15.6708   3 
   5   3  -2 126.713 23.3717   3 
   5   3  -2 145.653 24.1764   2 
   5   3  -2 146.491 18.3371   4 
   4   3  -2 213.677 17.6154   4 
   4   3  -2 270.936 27.6770   3 
   3   3  -2 296.019 26.4884   3 
  -3  -3   2 370.785 21.2689   4 
  -3  -3   2 323.654 27.3173   3 
   2   3  -2 390.627 28.0562   3 
   2   3  -2 439.037 20.8829   4 
  -2  -3   2 387.318 29.1477   3 
  -2  -3   2 403.091 23.0558   4 
   1   3  -2 330.961 26.5483   3 
  -1  -3   2 324.067 26.7879   3 
  -1  -3   2 294.528 20.0052   4 
   0   3  -2 303.496 27.0416   3 
   0   3  -2 299.257 31.1198   2 
   0  -3   2 334.759 20.2878   4 
   0  -3   2 334.658 27.2492   3 
  -1   3  -2 670.583 37.0856   1 
  -1   3  -2 685.347 45.4172   2 
  -1   3  -2 737.517 42.6925   3 
   1  -3   2 733.676 36.8075   1 
   1  -3   2 747.563 39.8036   3 
  -2   3  -2 12.2384 7.93712   1 
  -2   3  -2 4.62828 13.1255   3 
  -2   3  -2 1.38130 12.9171   2 
   2  -3   2 10.2424 10.3141   3 
   2  -3   2 0.02585 9.16581   1 
  -3   3  -2 832.248 47.2140   1 
  -3   3  -2 687.535 49.6363   2 
   3  -3   2 727.942 44.4266   3 
   3  -3   2 758.683 45.4568   1 
  -4   3  -2 8.10741 12.8775   1 
  -4   3  -2 12.4489 14.6212   2 
   4  -3   2 29.2501 18.6927   3 
   4  -3   2 14.6510 13.7787   1 
  -5   3  -2 285.744 38.5032   1 
  -5   3  -2 273.579 35.8621   2 
   5  -3   2 359.605 36.2368   3 
   5  -3   2 254.352 30.2799   1 
  -6   3  -2 83.6482 26.9486   1 
  -6   3  -2 128.686 30.2943   2 
   6  -3   2 46.4327 21.4528   1 
   6  -3   2 69.0933 21.8520   3 
  -7   3  -2 -5.6328 20.7780   2 
   7  -3   2 0.89502 18.3065   1 
   7  -3   2 53.5031 22.7836   3 
   8   2  -2 30.8624 15.0765   4 
   8   2  -2 -14.711 16.1196   3 
   7   2  -2 182.499 25.3871   4 
   7   2  -2 198.046 32.2860   3 
   6   2  -2 46.2374 13.5938   4 
   6   2  -2 52.3579 17.9732   3 
   5   2  -2 327.638 30.9208   3 
   5   2  -2 301.879 24.9212   4 
   4   2  -2 17.1264 8.82999   4 
   4   2  -2 9.47233 9.27803   3 
   3   2  -2 338.679 20.2692   4 
   3   2  -2 328.138 26.1759   3 
  -3  -2   2 312.103 21.2332   4 
   2   2  -2 324.794 25.6649   3 
   2   2  -2 347.296 18.3218   4 
  -2  -2   2 323.357 22.2633   4 
  -2  -2   2 308.632 25.7295   3 
   1   2  -2 389.976 26.3654   3 
   1   2  -2 424.981 20.1152   4 
  -1  -2   2 358.478 19.3865   4 
  -1  -2   2 381.207 26.5998   3 
   0   2  -2 276.710 23.1638   3 
   0   2  -2 275.801 27.4327   2 
   0  -2   2 293.212 23.1477   3 
   0  -2   2 306.667 17.7949   4 
  -1   2  -2 1514.04 70.4459   2 
  -1   2  -2 1438.40 61.5990   1 
  -1   2  -2 1611.97 65.2924   3 
   1  -2   2 1436.87 66.1098   1 
   1  -2   2 1592.95 63.5426   3 
  -2   2  -2 109.316 19.4666   3 
  -2   2  -2 135.593 23.3681   2 
  -2   2  -2 90.5323 16.0419   1 
   2  -2   2 111.078 23.7204   2 
   2  -2   2 114.485 18.0123   3 
   2  -2   2 99.1367 16.9330   1 
  -3   2  -2 101.380 22.0119   2 
  -3   2  -2 102.525 19.0960   1 
   3  -2   2 105.057 18.1415   3 
   3  -2   2 131.979 21.5723   1 
   3  -2   2 83.2427 21.3173   2 
  -4   2  -2 277.452 32.8495   2 
  -4   2  -2 311.583 31.7057   1 
   4  -2   2 276.483 28.3167   1 
   4  -2   2 348.259 30.7213   3 
   4  -2   2 302.619 33.6644   2 
  -5   2  -2 298.909 32.3071   1 
  -5   2  -2 296.658 40.4283   2 
   5  -2   2 249.284 34.3988   1 
   5  -2   2 193.600 32.1455   2 
  -6   2  -2 8.81604 14.2538   2 
   6  -2   2 16.2588 15.6532   2 
   6  -2   2 -0.8274 15.2927   3 
   6  -2   2 12.4876 16.5342   1 
  -7   2  -2 80.9160 27.4386   2 
   7  -2   2 61.1815 20.0447   1 
   7  -2   2 79.3107 22.6342   2 
   7  -2   2 59.9853 27.2627   3 
   8   1  -2 125.576 25.0899   3 
   8   1  -2 107.521 23.3379   4 
   7   1  -2 341.134 36.7407   3 
   7   1  -2 369.322 32.6587   4 
   6   1  -2 40.8523 12.9814   3 
   6   1  -2 14.0619 12.1525   4 
   5   1  -2 331.480 26.0994   4 
   5   1  -2 310.338 29.4691   3 
   4   1  -2 190.280 22.9500   3 
   4   1  -2 182.545 19.1308   4 
   3   1  -2 21.8745 10.6937   3 
   3   1  -2 15.6889 6.91073   4 
  -3  -1   2 -2.8787 7.28457   4 
   2   1  -2 7104.67 233.589   4 
   2   1  -2 6885.43 239.982   3 
  -2  -1   2 7128.19 234.629   4 
   1   1  -2 3431.53 125.541   3 
   1   1  -2 3832.85 120.896   4 
   1   1  -2 3416.32 126.559   2 
  -1  -1   2 3700.44 121.068   4 
  -1  -1   2 3417.77 126.032   3 
   0   1  -2 2906.61 106.886   3 
   0   1  -2 3207.24 121.136   2 
   0  -1   2 2930.76 109.940   3 
   0  -1   2 3252.05 104.462   4 
   0  -1   2 2905.78 111.789   2 
  -1   1  -2 2339.39 82.5448   3 
  -1   1  -2 2143.88 87.6582   2 
   1  -1   2 2276.89 89.6142   2 
   1  -1   2 2112.64 81.5084   1 
  -2   1  -2 131.693 18.3971   1 
  -2   1  -2 148.341 23.8368   2 
  -2   1  -2 181.741 22.9097   3 
   2  -1   2 190.372 26.2505   2 
   2  -1   2 129.451 18.3094   1 
   2  -1   2 145.131 17.9160   3 
  -3   1  -2 1835.02 83.4720   2 
  -3   1  -2 1923.49 82.0651   1 
   3  -1   2 2021.46 86.9326   2 
   3  -1   2 1980.98 77.8113   3 
   3  -1   2 1972.12 81.9385   1 
  -4   1  -2 892.038 50.2198   2 
  -4   1  -2 824.705 48.5668   1 
   4  -1   2 804.308 51.3054   2 
   4  -1   2 891.194 49.5857   1 
   4  -1   2 806.409 45.1526   3 
  -5   1  -2 417.671 37.1297   2 
   5  -1   2 481.283 36.2200   3 
   5  -1   2 449.808 39.1528   2 
   5  -1   2 470.934 38.3299   1 
  -6   1  -2 76.6688 20.1786   2 
   6  -1   2 31.3500 15.2516   1 
   6  -1   2 69.5275 19.9288   3 
   6  -1   2 52.9657 21.3723   2 
  -7   1  -2 56.8890 19.7486   2 
   7  -1   2 77.8301 24.9357   1 
   7  -1   2 71.2513 21.5901   3 
   7  -1   2 111.939 25.5084   2 
   8   0  -2 186.393 30.1299   4 
   8   0  -2 295.301 34.8459   3 
   7   0  -2 591.881 46.4170   1 
   7   0  -2 542.584 40.8770   4 
   6   0  -2 32.5189 11.8502   4 
   5   0  -2 1205.27 58.0123   4 
   4   0  -2 334.715 24.5976   4 
   3   0  -2 37.7937 10.3282   4 
  -3   0   2 55.0150 11.6550   4 
   2   0  -2 6271.87 211.194   4 
  -2   0   2 6349.60 211.750   4 
   1   0  -2 1963.79 76.1068   3 
   1   0  -2 1901.70 73.4912   2 
   1   0  -2 2110.88 72.4229   4 
  -1   0   2 2274.73 76.7622   4 
   0   0  -2 4482.87 157.414   3 
   0   0  -2 5129.55 156.777   4 
   0   0  -2 4567.92 160.695   2 
   0   0   2 4449.41 160.982   2 
   0   0   2 5172.29 156.766   4 
   0   0   2 4437.78 157.645   3 
  -1   0  -2 2122.21 82.2412   2 
  -1   0  -2 2220.30 75.1371   3 
   1   0   2 2133.11 82.0058   2 
   1   0   2 2128.96 74.4534   3 
   1   0   2 1985.44 77.2433   1 
  -2   0  -2 76.6557 17.1393   2 
   2   0   2 71.3255 13.7552   1 
   2   0   2 93.4123 17.0469   2 
  -3   0  -2 3760.64 140.105   2 
   3   0   2 3657.91 138.005   1 
   3   0   2 3773.53 141.106   2 
  -4   0  -2 1952.67 84.7207   2 
   4   0   2 1840.94 85.1537   2 
   4   0   2 1998.31 85.0834   1 
  -5   0  -2 360.004 32.0569   2 
   5   0   2 391.493 35.1150   1 
   5   0   2 418.111 36.1625   2 
  -6   0  -2 349.963 33.6227   2 
   6   0   2 339.455 35.4950   2 
   6   0   2 404.905 36.6593   1 
   6   0   2 333.771 33.4846   3 
  -7   0  -2 247.105 30.8023   2 
   7   0   2 221.376 34.8901   2 
   7   0   2 238.796 35.3824   1 
   8   0   2 25.7106 20.2194   4 
   8   0   2 2.27172 19.9926   1 
   8  -1  -2 198.615 29.6681   4 
   8  -1  -2 237.625 32.0946   1 
   7  -1  -2 13.4057 14.4296   4 
   7  -1  -2 15.7925 15.8008   1 
   6  -1  -2 284.213 27.7548   4 
   5  -1  -2 117.219 18.4653   4 
   5  -1  -2 103.558 17.9375   1 
  -5   1   2 101.395 22.3847   1 
   4  -1  -2 110.102 17.0353   4 
   4  -1  -2 114.764 17.7584   1 
  -4   1   2 114.903 19.9933   1 
   3  -1  -2 521.746 29.1835   1 
   3  -1  -2 559.086 30.9176   4 
  -3   1   2 511.034 30.6748   1 
   2  -1  -2 6445.00 217.084   1 
   2  -1  -2 6599.60 221.201   4 
  -2   1   2 6567.38 219.974   4 
   1  -1  -2 6.02198 6.33645   1 
   1  -1  -2 3.61374 5.29307   4 
  -1   1   2 13.2575 6.06366   1 
  -1   1   2 2.79443 5.30949   4 
   0  -1  -2 371.583 17.1024   4 
   0  -1  -2 363.445 20.2493   2 
   0   1   2 348.586 20.3470   2 
   0   1   2 386.824 17.3178   4 
  -1  -1  -2 9999.99 327.539   2 
   1   1   2 9704.48 326.376   2 
  -2  -1  -2 3521.64 127.391   2 
   2   1   2 3497.41 127.756   2 
  -3  -1  -2 3283.78 123.277   2 
   3   1   2 3218.42 123.894   2 
   3   1   2 3315.30 122.644   1 
  -4  -1  -2 517.693 35.6998   2 
   4   1   2 598.543 39.0949   2 
   4   1   2 578.321 38.2637   1 
  -5  -1  -2 29.7251 14.7512   2 
   5   1   2 43.8516 16.3356   2 
   5   1   2 32.5745 15.5834   1 
  -6  -1  -2 382.181 32.3403   2 
   6   1   2 329.175 36.1534   1 
   6   1   2 301.405 33.4937   2 
   7   1   2 72.8200 19.5763   2 
   7   1   2 79.5615 22.8644   1 
   8   1   2 134.698 25.5567   2 
   8   1   2 160.537 35.5242   1 
   8   1   2 181.751 33.1057   4 
   7  -2  -2 181.085 27.9963   1 
   7  -2  -2 187.139 29.2729   4 
  -7   2   2 329.978 46.5883   1 
   6  -2  -2 10.1004 9.33495   4 
  -6   2   2 2.29033 13.4865   1 
   5  -2  -2 183.653 24.7194   1 
   5  -2  -2 177.581 25.6622   4 
  -5   2   2 217.663 36.1853   1 
   4  -2  -2 34.5940 12.2557   1 
   4  -2  -2 -2.6874 7.79965   4 
  -4   2   2 28.9487 12.9159   1 
   3  -2  -2 27.0200 10.8553   4 
   3  -2  -2 56.6112 12.8449   1 
  -3   2   2 39.6943 13.0459   1 
   2  -2  -2 17.6662 7.49825   4 
   2  -2  -2 9.98507 8.64677   1 
  -2   2   2 31.2712 10.0294   1 
  -2   2   2 7.38076 7.60129   4 
   1  -2  -2 1338.18 51.5480   4 
   1  -2  -2 1346.05 50.9173   1 
  -1   2   2 1391.18 51.8292   1 
  -1   2   2 1347.73 51.7661   4 
   0  -2  -2 2365.77 78.2069   4 
   0   2   2 2273.68 78.3247   4 
   0   2   2 2215.20 81.4012   2 
  -1  -2  -2 3521.18 126.943   2 
   1   2   2 3979.58 120.588   4 
   1   2   2 3321.51 126.323   2 
  -2  -2  -2 172.234 19.2629   2 
   2   2   2 163.149 19.5602   2 
  -3  -2  -2 277.939 25.3759   2 
   3   2   2 298.028 26.9653   2 
  -4  -2  -2 13.2631 11.3035   2 
   4   2   2 37.9802 13.4855   2 
   4   2   2 12.5257 12.9435   1 
  -5  -2  -2 10.3262 10.3402   2 
   5   2   2 18.0085 13.1016   1 
   5   2   2 1.70825 12.2219   2 
   6   2   2 82.0501 20.9264   2 
   6   2   2 67.1031 17.7041   1 
   7   2   2 56.7362 20.6752   1 
   7   2   2 21.4006 15.1289   4 
   7   2   2 64.0552 17.4205   2 
   8   2   2 14.8983 15.3354   4 
   8   2   2 7.18313 19.1328   1 
   8   2   2 8.70638 15.5211   2 
   7  -3  -2 133.222 24.6379   4 
   7  -3  -2 146.722 29.0860   1 
  -7   3   2 305.677 44.2687   1 
   6  -3  -2 142.206 24.0880   1 
   6  -3  -2 121.106 21.6862   4 
  -6   3   2 139.826 29.8149   1 
   5  -3  -2 73.6170 17.4016   1 
   5  -3  -2 48.7890 15.1174   4 
  -5   3   2 65.9745 20.2483   1 
   4  -3  -2 28.7821 12.8106   1 
   4  -3  -2 22.4661 10.0344   4 
  -4   3   2 7.28239 10.7930   1 
   3  -3  -2 276.391 23.1864   1 
   3  -3  -2 331.302 24.1058   4 
  -3   3   2 266.024 24.3651   1 
   2  -3  -2 62.8258 12.4076   4 
   2  -3  -2 48.6475 12.4707   1 
  -2   3   2 61.1079 13.5233   1 
   1  -3  -2 576.975 27.6563   4 
  -1   3   2 536.800 27.5324   4 
  -1   3   2 606.301 29.6762   1 
   0   3   2 274.510 18.4354   1 
  -1  -3  -2 8967.96 274.470   4 
   1   3   2 7958.70 273.866   4 
   2   3   2 49.7324 14.3508   2 
   3   3   2 292.568 26.4835   2 
   4   3   2 1451.56 69.3183   2 
   5   3   2 21.7968 13.0854   2 
   5   3   2 12.9823 13.3671   1 
   6   3   2 73.5808 20.1547   2 
   6   3   2 53.9037 19.4276   1 
   7   3   2 73.8316 21.1858   1 
   7   3   2 43.2354 13.3793   4 
   7   3   2 84.4796 21.5521   2 
   8   3   2 10.3906 13.8189   4 
   8   3   2 9.17646 18.2555   1 
   8   3   2 16.1375 17.0239   2 
   7  -4  -2 199.986 33.1254   1 
   7  -4  -2 119.702 35.9587   3 
   7  -4  -2 100.050 23.9724   4 
   6  -4  -2 376.381 36.0084   4 
   6  -4  -2 413.463 37.2759   1 
  -6   4   2 427.135 44.3410   1 
   5  -4  -2 44.7934 15.7210   1 
   5  -4  -2 16.5537 12.6073   4 
  -5   4   2 34.9146 18.9693   1 
   4  -4  -2 1044.90 54.7972   4 
   4  -4  -2 1077.41 55.7471   1 
  -4   4   2 1060.17 59.5884   1 
   3  -4  -2 1307.73 60.1335   1 
   3  -4  -2 1269.67 59.1841   4 
  -3   4   2 1329.20 63.5995   1 
   2  -4  -2 2430.46 91.2976   1 
   2  -4  -2 2343.87 89.8279   4 
  -2   4   2 2281.63 92.6268   1 
   1  -4  -2 1627.01 62.7014   4 
   1  -4  -2 1647.75 64.8400   1 
   1  -4  -2 1606.58 71.1134   3 
  -1   4   2 1632.36 66.3688   1 
   0  -4  -2 337.964 18.0246   4 
   0  -4  -2 303.568 26.4490   3 
   0   4   2 349.540 23.4867   1 
  -1  -4  -2 5962.31 198.338   3 
   1   4   2 5720.44 198.720   3 
   3   4   2 994.265 52.9734   2 
   4   4   2 1035.44 56.3886   2 
   5   4   2 233.965 27.8846   1 
   5   4   2 215.833 28.2668   2 
   6   4   2 64.2573 14.0918   4 
   6   4   2 87.7279 21.7185   1 
   6   4   2 84.2143 24.8217   2 
   7   4   2 406.306 40.8441   1 
   7   4   2 404.954 31.1241   4 
   7   4   2 444.082 42.0365   2 
   8   4   2 0.27683 14.6587   2 
   8   4   2 19.5258 9.98205   4 
   8   4   2 -19.120 17.8803   1 
   6  -5  -2 286.830 31.2111   4 
   6  -5  -2 201.646 30.6319   1 
   6  -5  -2 293.157 43.4416   3 
  -6   5   2 268.632 40.0161   1 
   5  -5  -2 218.146 30.2876   4 
   5  -5  -2 240.164 28.2377   1 
   5  -5  -2 230.674 37.2261   3 
  -5   5   2 294.657 35.3679   1 
   4  -5  -2 738.148 53.9113   3 
   4  -5  -2 783.351 46.1015   4 
   4  -5  -2 763.408 47.3878   1 
  -4   5   2 705.823 49.0455   1 
   3  -5  -2 63.2553 17.0345   1 
   3  -5  -2 54.0256 13.6833   4 
   3  -5  -2 63.8684 24.6383   3 
  -3   5   2 35.8284 17.9604   2 
  -3   5   2 70.7440 18.6457   1 
   2  -5  -2 802.439 42.7839   1 
   2  -5  -2 845.442 41.3043   4 
   2  -5  -2 771.197 46.8193   3 
  -2   5   2 765.790 44.0117   1 
   1  -5  -2 1557.95 61.9733   4 
   1  -5  -2 1506.45 69.4165   3 
   1  -5  -2 1627.87 65.5694   1 
  -1   5   2 1595.63 66.9607   1 
   0  -5  -2 30.4141 6.77431   4 
   0  -5  -2 44.7228 12.6386   3 
   0   5   2 52.7053 11.0078   1 
  -1  -5  -2 2251.72 85.4680   3 
   1   5   2 2233.15 88.0571   3 
   1   5   2 2185.68 83.6711   1 
   2   5   2 409.755 32.8856   3 
   4   5   2 732.959 48.3745   2 
   5   5   2 1121.75 47.7084   4 
   5   5   2 1085.44 62.8182   2 
   6   5   2 450.612 41.3205   2 
   6   5   2 382.188 27.2767   4 
   6   5   2 455.516 37.9327   1 
   7   5   2 156.942 21.1628   4 
   7   5   2 227.354 36.1527   2 
   8   5   2 13.9978 11.9026   4 
   8   5   2 20.1464 18.2774   2 
   6  -6  -2 -3.0619 14.1974   4 
   5  -6  -2 39.0463 14.0734   4 
   5  -6  -2 52.3721 19.7365   1 
  -5   6   2 36.1236 20.2735   1 
   4  -6  -2 56.6197 17.4522   1 
   4  -6  -2 115.859 27.6799   3 
   4  -6  -2 52.6546 14.7431   4 
  -4   6   2 42.5989 19.0517   1 
   3  -6  -2 6.30355 7.19916   1 
   3  -6  -2 29.1976 16.9445   3 
   3  -6  -2 4.83457 7.82630   4 
  -3   6   2 17.0239 18.8968   2 
  -3   6   2 2.80551 13.1760   1 
   2  -6  -2 43.4485 10.6679   4 
   2  -6  -2 37.6941 16.6386   3 
   2  -6  -2 36.9727 14.5779   1 
  -2   6   2 43.0745 18.8258   1 
   1  -6  -2 501.560 28.8344   4 
   1  -6  -2 484.930 36.9141   3 
   1  -6  -2 531.190 33.2860   1 
  -1   6   2 539.978 34.4745   1 
   0  -6  -2 2.86803 10.4855   3 
   0  -6  -2 4.32837 5.37674   4 
   0   6   2 5.58153 8.17819   1 
  -1  -6  -2 75.5507 15.1643   3 
   1   6   2 69.2077 17.9700   3 
   1   6   2 62.9399 12.6010   1 
  -2  -6  -2 758.686 41.3292   3 
   2   6   2 772.267 37.7783   1 
   2   6   2 773.347 41.8123   3 
  -3  -6  -2 47.6141 12.8678   3 
   4   6   2 625.904 47.8658   2 
   5   6   2 167.012 31.0519   2 
   6   6   2 276.140 34.2829   2 
   6   6   2 245.670 19.0880   4 
   7   6   2 29.1088 20.0079   2 
   7   6   2 2.89796 8.95322   4 
   5  -7  -2 25.5544 18.1290   1 
   5  -7  -2 69.5556 18.4955   4 
   5  -7  -2 24.0713 29.9133   3 
   4  -7  -2 11.1588 16.6658   3 
   4  -7  -2 16.7152 13.9483   1 
   4  -7  -2 29.6898 10.3518   4 
  -4   7   2 19.1701 21.6159   2 
  -4   7   2 2.29084 15.4773   1 
   3  -7  -2 -12.780 14.0130   3 
   3  -7  -2 15.4036 12.5537   1 
   3  -7  -2 38.6251 13.3555   4 
  -3   7   2 14.2300 20.2363   2 
  -3   7   2 22.8244 13.1675   1 
   2  -7  -2 135.965 19.6105   4 
   2  -7  -2 125.958 21.5333   1 
   2  -7  -2 117.417 21.2970   3 
  -2   7   2 125.786 23.2737   1 
   1  -7  -2 144.492 21.0505   1 
   1  -7  -2 110.384 15.4492   4 
   1  -7  -2 116.038 22.8849   3 
  -1   7   2 83.4691 18.7239   1 
   0  -7  -2 96.3258 12.5563   4 
   0  -7  -2 68.3939 18.9032   3 
   0   7   2 99.9939 17.2642   1 
  -1  -7  -2 65.1659 16.1846   3 
   1   7   2 63.1502 14.8324   1 
   1   7   2 50.6598 18.0785   3 
  -2  -7  -2 191.363 23.4615   3 
   2   7   2 111.370 20.9831   3 
  -3  -7  -2 10.9837 10.2406   3 
   3   7   2 16.9796 10.0784   3 
   3   7   2 -3.1893 7.78327   1 
   4   7   2 83.9258 17.4179   3 
   5   7   2 95.4103 25.5857   2 
   6   7   2 53.3404 23.7212   2 
   7   7   2 81.5190 29.8782   2 
   5  -8  -2 65.1295 20.3619   1 
   5  -8  -2 99.9074 22.8685   4 
   4  -8  -2 254.204 43.0975   3 
   4  -8  -2 254.405 32.2665   4 
   4  -8  -2 224.271 31.7093   1 
  -4   8   2 241.060 37.9581   1 
  -4   8   2 261.116 43.7727   2 
   3  -8  -2 195.893 25.7588   4 
   3  -8  -2 270.490 30.8303   1 
   3  -8  -2 171.011 34.9485   3 
  -3   8   2 265.942 38.3942   2 
  -3   8   2 212.083 34.6983   1 
   2  -8  -2 21.2362 14.6934   1 
   2  -8  -2 -6.9273 14.2659   3 
   2  -8  -2 13.9063 11.4721   4 
  -2   8   2 9.53514 21.5197   2 
  -2   8   2 -0.0628 14.0881   1 
   1  -8  -2 93.4538 18.7762   1 
   1  -8  -2 81.9383 14.5850   4 
   1  -8  -2 119.785 25.9232   3 
  -1   8   2 72.1976 17.3321   1 
   0  -8  -2 989.011 59.3316   3 
   0  -8  -2 1154.60 49.4341   4 
   0   8   2 1057.98 56.4205   1 
  -1  -8  -2 563.175 40.4903   3 
   1   8   2 574.416 38.0654   1 
   1   8   2 559.692 44.9062   3 
  -2  -8  -2 439.877 42.0096   3 
   2   8   2 470.799 34.1247   1 
   2   8   2 510.981 41.5283   3 
  -3  -8  -2 -10.323 10.2632   3 
   3   8   2 23.5290 15.4705   3 
  -4  -8  -2 78.7035 19.3364   3 
   5   8   2 365.067 44.4681   2 
   6   8   2 5.96200 17.8796   2 
   4  -9  -2 56.9774 23.5009   1 
   4  -9  -2 72.4438 19.8050   4 
  -4   9   2 92.0508 35.3380   2 
   3  -9  -2 85.2526 19.0958   4 
   3  -9  -2 69.7486 22.5589   1 
  -3   9   2 68.1910 23.7550   1 
  -3   9   2 72.0331 26.2914   2 
   2  -9  -2 10.2488 14.0557   1 
   2  -9  -2 12.3252 10.3026   4 
   2  -9  -2 13.7222 20.5986   3 
  -2   9   2 -6.0780 21.7805   2 
   1  -9  -2 596.849 47.0451   3 
   1  -9  -2 479.835 31.9158   4 
  -1   9   2 522.767 43.2577   1 
   0  -9  -2 329.715 34.7971   3 
   0   9   2 359.396 33.8687   1 
  -1  -9  -2 78.6961 21.5058   3 
   1   9   2 95.4796 20.9711   1 
  -2  -9  -2 363.348 34.3934   3 
   2   9   2 407.431 32.1477   1 
   2   9   2 397.031 44.8595   3 
  -3  -9  -2 231.729 27.9733   3 
   3   9   2 215.351 31.7117   3 
  -4  -9  -2 23.5404 11.3895   3 
   4   9   2 55.5603 17.2885   3 
   5   9   2 282.797 44.8292   2 
   2 -10  -2 7.64872 15.9960   4 
   2 -10  -2 47.0529 19.8849   1 
  -2  10   2 27.1237 34.1582   2 
   1 -10  -2 36.1885 14.4677   4 
   1 -10  -2 1.10398 18.5559   3 
  -1  10   2 62.2909 23.0528   1 
   0  10   2 130.027 30.1253   1 
  -1 -10  -2 -8.7747 14.7017   3 
   1  10   2 -0.6951 18.2198   1 
  -2 -10  -2 147.454 27.6574   3 
   2  10   2 137.009 32.5602   3 
   2  10   2 177.484 25.9329   1 
  -3 -10  -2 -6.4845 15.0016   3 
   3  10   2 -8.3515 17.6850   3 
  -4 -10  -2 -10.119 12.9013   3 
   4  10   2 -13.563 18.2861   3 
  -5 -10  -2 95.7901 23.4394   3 
   5  10   2 146.514 36.3774   2 
   0  11   2 12.0651 25.6657   1 
  -1 -11  -2 -20.481 20.3249   3 
   1  11   2 -46.054 20.0860   1 
  -2 -11  -2 -33.072 16.6797   3 
   3  11   2 37.2624 24.4576   3 
   4   8  -3 -56.491 28.9785   3 
   3   8  -3 16.3876 21.0964   3 
   2   8  -3 119.495 31.1799   3 
   2   8  -3 210.628 48.7519   2 
  -2  -8   3 131.992 28.7986   3 
   1   8  -3 -5.8990 18.8234   3 
   1   8  -3 -48.192 42.6457   2 
  -1  -8   3 37.3900 22.0738   3 
   0   8  -3 80.2946 30.0731   3 
   0  -8   3 97.0897 17.5429   4 
  -1   8  -3 -13.676 34.9802   3 
   1  -8   3 25.5585 15.5859   4 
  -2   8  -3 -23.610 21.0324   1 
   2  -8   3 -7.4807 14.2210   4 
   5   7  -3 52.0392 23.4261   3 
   4   7  -3 -5.8530 15.7284   3 
  -4  -7   3 4.54067 16.4330   3 
   3   7  -3 -2.8022 16.1491   3 
  -3  -7   3 36.0739 19.5046   3 
   2   7  -3 25.6736 19.8550   2 
   2   7  -3 19.6101 19.2914   3 
  -2  -7   3 34.8153 17.7580   3 
   1   7  -3 46.1378 22.5024   3 
   1   7  -3 30.4182 20.0770   2 
  -1  -7   3 43.7839 9.55427   4 
  -1  -7   3 5.55690 13.5801   3 
   0   7  -3 26.6585 21.7512   3 
   0   7  -3 34.3694 25.7260   2 
   0  -7   3 18.2182 18.6409   3 
   0  -7   3 8.21733 9.76742   4 
  -1   7  -3 22.2402 24.8688   2 
  -1   7  -3 44.5523 23.7266   3 
   1  -7   3 28.4089 11.2492   4 
   1  -7   3 49.4285 20.0720   3 
  -2   7  -3 92.5124 31.0694   2 
  -2   7  -3 35.4872 24.6273   3 
  -2   7  -3 -43.576 14.3734   1 
   2  -7   3 -11.268 14.9839   1 
   2  -7   3 -24.636 17.2780   3 
  -3   7  -3 -9.1874 22.6825   1 
   3  -7   3 28.9579 23.1929   1 
   6   6  -3 10.5877 20.0962   3 
   5   6  -3 10.8374 16.7028   3 
   4   6  -3 234.685 33.0920   3 
  -4  -6   3 199.855 31.4403   3 
   3   6  -3 25.5101 16.7052   3 
  -3  -6   3 9.26762 15.4755   3 
   2   6  -3 42.4495 23.1032   2 
   2   6  -3 56.2691 20.0349   3 
  -2  -6   3 61.6196 11.2134   4 
  -2  -6   3 72.5906 20.8289   3 
   1   6  -3 31.3183 18.3708   2 
   1   6  -3 70.2037 20.6868   3 
  -1  -6   3 55.9434 11.7442   4 
  -1  -6   3 63.8376 18.8537   3 
   0   6  -3 215.196 32.8611   3 
   0   6  -3 234.376 42.1810   2 
   0  -6   3 274.233 21.8384   4 
   0  -6   3 240.721 31.0988   3 
  -1   6  -3 180.156 33.6530   3 
  -1   6  -3 235.833 37.9510   2 
   1  -6   3 134.897 27.3728   3 
   1  -6   3 199.005 22.5291   4 
  -2   6  -3 38.0394 18.8456   1 
  -2   6  -3 96.6173 32.3285   2 
  -2   6  -3 79.6037 26.7496   3 
   2  -6   3 12.1047 15.6654   3 
  -3   6  -3 26.2015 44.6422   2 
  -3   6  -3 -21.371 17.7513   1 
   3  -6   3 21.8700 14.6157   1 
   3  -6   3 -1.6735 18.4286   3 
  -4   6  -3 -28.509 26.0933   2 
  -4   6  -3 -37.828 20.6673   1 
   4  -6   3 79.7912 22.5471   1 
   4  -6   3 28.6867 20.0338   3 
   7   5  -3 40.8721 12.6932   4 
   7   5  -3 27.1073 18.8985   3 
   6   5  -3 219.897 33.7777   3 
   6   5  -3 265.412 20.7445   4 
   5   5  -3 221.676 33.0016   3 
   5   5  -3 257.751 19.5310   4 
   4   5  -3 398.244 36.2077   3 
   4   5  -3 357.052 22.6701   4 
  -4  -5   3 368.112 36.6234   3 
  -4  -5   3 400.551 25.3550   4 
   3   5  -3 84.7729 20.2532   3 
  -3  -5   3 68.4952 20.0399   3 
  -3  -5   3 95.5235 13.2682   4 
   2   5  -3 560.479 42.4217   3 
  -2  -5   3 566.416 29.4263   4 
  -2  -5   3 562.186 41.5851   3 
   1   5  -3 1128.75 70.2214   2 
   1   5  -3 1200.01 64.0023   3 
  -1  -5   3 1143.22 63.6525   3 
  -1  -5   3 1161.19 49.5436   4 
   0   5  -3 37.7740 17.8371   3 
   0   5  -3 72.2285 19.4292   2 
   0  -5   3 27.9760 9.56360   4 
   0  -5   3 44.8174 13.5746   3 
  -1   5  -3 1010.68 61.7621   3 
  -1   5  -3 937.622 65.7627   2 
   1  -5   3 929.230 48.0720   4 
   1  -5   3 1041.54 58.9263   3 
  -2   5  -3 324.765 47.7277   2 
  -2   5  -3 343.664 43.5729   3 
  -2   5  -3 306.261 31.0883   1 
   2  -5   3 353.789 32.6189   1 
   2  -5   3 336.138 35.8265   3 
  -3   5  -3 8.80750 14.2078   1 
  -3   5  -3 -0.7336 14.7289   2 
   3  -5   3 -8.1747 14.5108   1 
   3  -5   3 20.1959 14.9119   3 
  -4   5  -3 489.829 48.7671   1 
  -4   5  -3 398.490 54.5925   2 
   4  -5   3 436.863 43.4233   3 
   4  -5   3 436.854 40.3102   1 
  -5   5  -3 11.2619 23.5776   2 
   5  -5   3 9.27153 21.0616   3 
   5  -5   3 30.1975 20.3364   1 
   7   4  -3 189.584 21.2131   4 
   7   4  -3 148.927 29.6410   3 
   6   4  -3 185.401 30.1479   3 
   6   4  -3 190.168 19.7021   4 
   5   4  -3 128.374 23.5077   3 
   5   4  -3 175.048 17.5789   4 
   4   4  -3 714.685 34.7038   4 
   4   4  -3 711.479 46.9812   3 
  -4  -4   3 704.273 36.8280   4 
   3   4  -3 538.493 27.1755   4 
   3   4  -3 524.385 38.6245   3 
  -3  -4   3 510.499 28.5038   4 
  -3  -4   3 436.970 38.7223   3 
   2   4  -3 693.035 44.4093   3 
  -2  -4   3 719.138 46.0817   3 
  -2  -4   3 750.341 34.4713   4 
   1   4  -3 293.105 32.2264   2 
   1   4  -3 258.552 28.6481   3 
  -1  -4   3 248.492 18.0005   4 
  -1  -4   3 271.415 27.8843   3 
   0   4  -3 445.070 40.5783   2 
   0   4  -3 486.958 36.8053   3 
   0  -4   3 498.054 36.2780   3 
   0  -4   3 445.228 27.1039   4 
  -1   4  -3 515.932 41.4852   3 
   1  -4   3 594.732 34.7248   1 
   1  -4   3 563.381 41.6721   3 
  -2   4  -3 492.533 35.9003   1 
  -2   4  -3 492.208 44.8557   3 
  -2   4  -3 437.300 44.4429   2 
   2  -4   3 512.268 35.9400   1 
   2  -4   3 508.785 39.2942   3 
  -3   4  -3 147.772 25.8281   1 
  -3   4  -3 151.908 29.1156   2 
   3  -4   3 140.978 24.8420   1 
   3  -4   3 118.055 21.7161   3 
  -4   4  -3 487.288 44.0294   1 
  -4   4  -3 461.194 47.4462   2 
   4  -4   3 512.876 42.1931   1 
   4  -4   3 489.201 42.3422   3 
  -5   4  -3 93.5038 26.5644   2 
  -5   4  -3 118.326 28.5631   1 
   5  -4   3 84.2036 22.6680   1 
   5  -4   3 75.3321 22.1771   3 
  -6   4  -3 62.7889 25.0029   2 
   6  -4   3 20.9325 21.4246   1 
   6  -4   3 -37.294 19.2634   3 
   7   3  -3 -24.764 12.1163   3 
   7   3  -3 11.1651 10.0900   4 
   6   3  -3 8.75848 8.71669   4 
   6   3  -3 14.9350 17.3700   3 
   5   3  -3 78.7269 13.7724   4 
   5   3  -3 54.4364 16.6509   3 
   4   3  -3 254.134 28.7179   3 
   4   3  -3 214.326 18.0454   4 
  -4  -3   3 236.647 20.4053   4 
   3   3  -3 324.121 20.3715   4 
   3   3  -3 317.949 29.1631   3 
  -3  -3   3 327.179 30.6934   3 
  -3  -3   3 294.524 21.0807   4 
   2   3  -3 2.32826 8.10161   3 
   2   3  -3 -1.8299 5.36736   4 
  -2  -3   3 0.16616 7.29196   3 
  -2  -3   3 7.55630 6.17060   4 
   1   3  -3 639.697 44.1930   2 
   1   3  -3 664.260 39.6409   3 
  -1  -3   3 671.105 31.2531   4 
  -1  -3   3 687.864 41.0993   3 
   0   3  -3 826.879 52.6594   2 
   0   3  -3 869.440 46.8282   3 
   0  -3   3 854.888 39.2837   4 
   0  -3   3 931.346 48.0524   3 
  -1   3  -3 397.293 32.0975   3 
  -1   3  -3 376.408 35.0613   2 
   1  -3   3 414.908 31.3471   3 
  -2   3  -3 663.204 48.7447   2 
  -2   3  -3 612.305 39.9629   1 
  -2   3  -3 661.607 45.6783   3 
   2  -3   3 659.469 40.3013   3 
   2  -3   3 675.171 40.7430   1 
  -3   3  -3 29.9654 18.6101   2 
  -3   3  -3 28.7843 14.3778   1 
   3  -3   3 33.5226 14.7255   3 
   3  -3   3 35.0710 14.6187   1 
  -4   3  -3 227.299 37.6967   2 
  -4   3  -3 190.331 30.5173   1 
   4  -3   3 258.175 37.3759   1 
   4  -3   3 230.927 30.5218   3 
  -5   3  -3 126.814 32.2038   2 
   5  -3   3 72.4174 22.0602   3 
   5  -3   3 65.3824 24.2317   1 
  -6   3  -3 87.1994 25.2099   2 
   6  -3   3 67.6579 20.9419   1 
   6  -3   3 22.9914 22.9815   3 
   8   2  -3 40.7607 21.5175   3 
   7   2  -3 13.4675 10.7956   4 
   7   2  -3 12.7321 14.4566   3 
   6   2  -3 13.8370 16.8790   3 
   6   2  -3 12.7086 9.63445   4 
   5   2  -3 162.877 18.1779   4 
   5   2  -3 166.332 25.3255   3 
   4   2  -3 36.8840 15.0818   3 
   4   2  -3 30.8813 9.69322   4 
  -4  -2   3 44.0453 12.7624   4 
   3   2  -3 8.99114 7.08246   4 
   3   2  -3 8.17534 11.8067   3 
  -3  -2   3 28.2326 8.42843   4 
   2   2  -3 131.496 19.9726   3 
   2   2  -3 131.616 12.8797   4 
  -2  -2   3 123.008 13.5377   4 
  -2  -2   3 115.526 19.9788   3 
   1   2  -3 473.658 35.9918   2 
   1   2  -3 466.030 31.8468   3 
   1   2  -3 530.832 26.1914   4 
  -1  -2   3 506.091 25.4107   4 
  -1  -2   3 454.489 31.6007   3 
   0   2  -3 260.303 24.7350   3 
   0   2  -3 276.083 31.1054   2 
   0  -2   3 291.599 20.2999   4 
   0  -2   3 317.551 26.5567   3 
  -1   2  -3 153.282 25.9009   2 
  -1   2  -3 182.638 22.6640   3 
  -1   2  -3 153.930 18.4787   1 
   1  -2   3 164.721 20.4691   3 
   1  -2   3 148.865 18.7125   1 
   1  -2   3 201.001 29.9788   2 
  -2   2  -3 23.7542 13.7099   3 
  -2   2  -3 -2.4576 9.12018   1 
  -2   2  -3 13.6764 15.2664   2 
   2  -2   3 12.9311 8.20305   1 
   2  -2   3 7.40135 8.69291   3 
   2  -2   3 7.75976 14.8284   2 
  -3   2  -3 919.716 58.5358   2 
  -3   2  -3 919.107 52.3001   1 
   3  -2   3 941.667 60.1287   2 
   3  -2   3 1056.40 54.9504   1 
   3  -2   3 1037.41 50.7543   3 
  -4   2  -3 163.791 27.2803   1 
  -4   2  -3 133.982 36.4811   2 
   4  -2   3 92.7501 25.9597   2 
   4  -2   3 159.836 25.8018   1 
   4  -2   3 130.032 23.6614   3 
  -5   2  -3 105.070 26.7803   2 
   5  -2   3 86.7505 21.6857   1 
   5  -2   3 62.3861 21.7106   2 
   5  -2   3 57.4766 16.8120   3 
  -6   2  -3 -15.285 18.6181   2 
   6  -2   3 5.61817 16.0596   3 
   6  -2   3 -14.560 15.9376   2 
   6  -2   3 2.06943 15.0750   1 
  -7   2  -3 32.5540 22.8946   2 
   7  -2   3 20.2839 20.1249   2 
   7  -2   3 19.9145 19.9143   3 
   7  -2   3 8.98068 19.6138   1 
   8   1  -3 104.438 23.4439   4 
   8   1  -3 90.3613 27.6458   3 
   7   1  -3 32.7425 12.6532   4 
   7   1  -3 26.0630 18.4142   3 
   6   1  -3 85.4930 33.1226   3 
   6   1  -3 83.6808 17.8605   4 
   5   1  -3 112.638 22.7360   3 
   5   1  -3 134.480 19.1824   4 
   4   1  -3 50.0232 15.3713   3 
   4   1  -3 53.9749 12.5923   4 
  -4  -1   3 74.3445 14.8683   4 
   3   1  -3 5306.94 185.936   4 
   3   1  -3 5435.49 195.283   3 
  -3  -1   3 5513.19 187.862   4 
   2   1  -3 486.762 31.2100   2 
   2   1  -3 480.047 25.6883   4 
   2   1  -3 482.713 32.3969   3 
  -2  -1   3 507.062 27.0929   4 
   1   1  -3 4657.05 150.963   4 
   1   1  -3 4159.83 158.171   2 
   1   1  -3 4447.32 156.417   3 
  -1  -1   3 4279.16 157.151   3 
  -1  -1   3 4490.85 150.577   4 
   0   1  -3 1688.59 74.7632   2 
   0   1  -3 1708.27 68.3473   3 
   0  -1   3 1716.54 74.6770   2 
   0  -1   3 1751.31 64.4214   4 
   0  -1   3 1690.45 68.9313   3 
  -1   1  -3 360.535 26.5853   3 
  -1   1  -3 343.221 31.3164   2 
   1  -1   3 366.468 24.8693   1 
   1  -1   3 323.699 32.2223   2 
   1  -1   3 401.439 26.2443   3 
  -2   1  -3 2928.82 108.512   3 
  -2   1  -3 2766.29 116.216   2 
   2  -1   3 2874.72 118.158   2 
   2  -1   3 2882.76 105.730   3 
   2  -1   3 2897.19 109.644   1 
  -3   1  -3 351.287 33.3088   2 
   3  -1   3 347.379 30.1225   1 
   3  -1   3 345.526 26.7247   3 
   3  -1   3 381.108 35.2542   2 
  -4   1  -3 719.646 50.3256   2 
   4  -1   3 724.117 40.6790   3 
   4  -1   3 641.575 49.4189   2 
   4  -1   3 706.887 45.4827   1 
  -5   1  -3 25.8676 17.8973   2 
   5  -1   3 18.9663 15.2273   1 
   5  -1   3 6.48235 17.9568   2 
   5  -1   3 8.45492 13.5054   3 
  -6   1  -3 117.494 28.4400   2 
   6  -1   3 193.824 31.3425   1 
   6  -1   3 207.095 41.1105   2 
  -7   1  -3 83.6969 22.4821   2 
   7  -1   3 25.8745 18.0847   1 
   7  -1   3 -4.2340 17.2164   2 
   8   0  -3 37.6819 16.9409   4 
   8   0  -3 21.1238 22.0633   3 
   7   0  -3 46.2291 18.9781   3 
   7   0  -3 37.5687 13.3003   4 
   6   0  -3 900.045 52.4943   4 
   5   0  -3 441.805 31.0042   4 
   4   0  -3 1007.41 47.8038   4 
  -4   0   3 957.315 48.6408   4 
   3   0  -3 8105.00 273.113   4 
   3   0  -3 7930.69 279.478   3 
  -3   0   3 8246.24 274.533   4 
   2   0  -3 190.940 21.1913   3 
   2   0  -3 184.839 15.9592   4 
  -2   0   3 166.108 16.5096   4 
   1   0  -3 1623.81 59.5878   4 
   1   0  -3 1511.27 63.3651   2 
   1   0  -3 1561.29 64.0534   3 
  -1   0   3 1638.11 60.0468   4 
  -1   0   3 1560.31 63.3560   2 
   0   0  -3 2037.36 72.6534   4 
   0   0  -3 1955.11 74.1203   3 
   0   0  -3 1904.57 78.6253   2 
   0   0   3 1929.48 79.3090   2 
   0   0   3 2122.05 72.7292   4 
  -1   0  -3 29.4384 9.16551   3 
  -1   0  -3 28.6151 13.7335   2 
   1   0   3 26.0362 8.37132   3 
   1   0   3 24.2516 8.36143   4 
   1   0   3 9.95329 12.8265   2 
   1   0   3 20.6406 10.0154   1 
  -2   0  -3 512.214 29.8127   3 
  -2   0  -3 506.429 35.4993   2 
   2   0   3 449.165 35.4180   2 
   2   0   3 499.361 31.7703   1 
  -3   0  -3 581.672 40.0960   2 
   3   0   3 645.223 38.9963   1 
   3   0   3 620.311 41.4401   2 
  -4   0  -3 365.346 32.5867   2 
   4   0   3 333.797 31.3458   1 
   4   0   3 350.428 33.6384   2 
  -5   0  -3 639.954 46.5858   2 
   5   0   3 630.263 47.6128   2 
   5   0   3 690.587 46.9378   1 
  -6   0  -3 254.292 35.5974   2 
   6   0   3 243.721 35.7409   1 
   6   0   3 206.875 35.7779   2 
  -7   0  -3 421.269 43.1527   2 
   7   0   3 352.306 40.3707   2 
   7   0   3 371.585 40.5086   1 
   8  -1  -3 0.31186 13.7905   4 
   7  -1  -3 133.424 24.4135   4 
   6  -1  -3 241.569 27.5866   4 
   6  -1  -3 247.818 26.2507   1 
   5  -1  -3 47.5489 13.9633   1 
   5  -1  -3 71.1161 17.3098   4 
  -5   1   3 40.0023 15.0088   1 
   4  -1  -3 224.161 21.0193   4 
   3  -1  -3 1514.50 63.2375   4 
  -3   1   3 1533.74 63.9876   4 
   2  -1  -3 183.956 17.6466   4 
  -2   1   3 233.843 19.2760   4 
   1  -1  -3 85.9996 10.2003   4 
  -1   1   3 77.7952 10.5614   4 
   0  -1  -3 2159.86 80.1559   3 
   0  -1  -3 2377.60 79.3733   4 
   0   1   3 2142.08 83.6557   2 
  -1  -1  -3 6349.88 224.558   2 
   1   1   3 6160.78 224.523   2 
   1   1   3 7075.78 218.017   4 
  -2  -1  -3 3524.82 133.981   2 
   2   1   3 3597.97 134.850   2 
  -3  -1  -3 1088.64 55.4382   2 
   3   1   3 1050.81 56.3467   2 
   3   1   3 1100.24 53.9797   1 
  -4  -1  -3 255.717 27.1144   2 
   4   1   3 224.746 26.8027   1 
   4   1   3 244.095 33.1377   2 
  -5  -1  -3 1040.64 57.8948   2 
   5   1   3 986.186 57.3794   1 
   5   1   3 1008.84 60.5284   2 
  -6  -1  -3 92.4690 25.4297   2 
   6   1   3 105.804 26.1984   1 
   6   1   3 97.9411 23.7362   2 
  -7  -1  -3 453.924 42.8123   2 
   7   1   3 350.643 38.4566   2 
   7   1   3 466.122 44.3911   1 
   8   1   3 181.038 30.0878   4 
   8   1   3 204.485 33.9391   2 
   8   1   3 201.785 34.3615   1 
   7  -2  -3 55.8326 16.6312   4 
   7  -2  -3 37.9579 15.2436   1 
  -7   2   3 68.2512 29.8160   1 
   6  -2  -3 31.2367 13.1322   1 
   6  -2  -3 24.3426 10.8854   4 
  -6   2   3 28.8027 16.2456   1 
   5  -2  -3 179.031 22.8745   1 
   5  -2  -3 169.044 22.9812   4 
  -5   2   3 203.923 28.1282   1 
   4  -2  -3 11.8024 10.0510   4 
   4  -2  -3 18.6319 10.0397   1 
  -4   2   3 22.6278 9.42164   1 
   3  -2  -3 204.979 19.0616   4 
   3  -2  -3 200.713 18.1570   1 
  -3   2   3 182.374 19.6398   1 
  -3   2   3 184.303 19.1988   4 
   2  -2  -3 1182.99 48.3829   1 
   2  -2  -3 1180.80 50.4831   4 
  -2   2   3 1152.35 49.2101   1 
  -2   2   3 1212.72 51.2633   4 
   1  -2  -3 1182.00 47.5790   4 
  -1   2   3 1212.86 48.2933   4 
   0  -2  -3 449.798 20.8691   4 
   0  -2  -3 417.020 25.1288   2 
   0   2   3 374.286 24.0520   2 
   0   2   3 445.502 21.1451   4 
  -1  -2  -3 286.867 23.1794   2 
   1   2   3 304.022 24.6464   2 
   1   2   3 385.809 19.1968   4 
  -2  -2  -3 2497.67 97.5264   2 
   2   2   3 2500.27 99.5690   2 
  -3  -2  -3 181.657 25.7394   2 
   3   2   3 188.782 28.4285   2 
  -4  -2  -3 113.729 23.3652   2 
   4   2   3 122.757 25.1205   2 
   4   2   3 88.7178 19.6592   1 
  -5  -2  -3 377.188 34.5112   2 
   5   2   3 403.551 36.8065   2 
   5   2   3 427.159 36.1475   1 
  -6  -2  -3 15.7584 14.3175   2 
   6   2   3 15.0818 16.8250   1 
   6   2   3 20.0213 18.9773   2 
   7   2   3 -3.4943 16.5846   2 
   7   2   3 10.0941 18.9310   1 
   8   2   3 -1.3326 17.3943   4 
   8   2   3 10.8647 14.7912   2 
   7  -3  -3 80.3362 20.9832   4 
   7  -3  -3 62.2027 21.6150   1 
   6  -3  -3 106.735 21.1493   4 
   6  -3  -3 125.224 24.7959   1 
  -6   3   3 138.356 30.9863   1 
   5  -3  -3 107.313 26.2557   4 
   5  -3  -3 108.076 20.8122   1 
  -5   3   3 74.5907 19.4545   1 
   4  -3  -3 81.2003 16.2681   1 
   4  -3  -3 78.1965 15.6905   4 
  -4   3   3 79.9276 17.5412   1 
   3  -3  -3 207.062 20.4159   4 
   3  -3  -3 230.999 21.1718   1 
  -3   3   3 227.754 22.6058   1 
   2  -3  -3 272.174 20.8938   1 
   2  -3  -3 260.443 20.8524   4 
  -2   3   3 269.706 22.4598   1 
  -2   3   3 268.689 22.1221   4 
   1  -3  -3 263.066 18.9642   4 
   1  -3  -3 265.361 19.1902   1 
  -1   3   3 249.680 18.6792   4 
  -1   3   3 268.369 19.8679   1 
   0  -3  -3 5513.59 177.601   4 
   0   3   3 5356.25 177.670   4 
   0   3   3 5056.33 181.668   2 
  -1  -3  -3 327.822 17.6241   4 
   1   3   3 360.950 17.5066   4 
   1   3   3 298.311 28.9062   2 
  -2  -3  -3 476.900 31.7510   2 
   2   3   3 463.582 33.1570   2 
  -3  -3  -3 1338.71 63.5035   2 
   3   3   3 1388.65 65.2509   2 
  -4  -3  -3 18.7314 11.8748   2 
   4   3   3 16.2730 13.2973   2 
   5   3   3 231.044 35.4366   2 
   5   3   3 259.669 34.1160   1 
   6   3   3 71.4245 20.8996   1 
   6   3   3 52.2832 22.2807   2 
   7   3   3 99.6094 25.0505   1 
   7   3   3 68.7376 25.9619   2 
   8   3   3 5.93838 22.3946   1 
   8   3   3 13.3066 16.0240   4 
   8   3   3 29.2499 18.7533   2 
   7  -4  -3 80.4203 21.6545   1 
   7  -4  -3 86.9995 23.9185   4 
  -7   4   3 51.9053 31.4600   1 
   6  -4  -3 282.075 31.5915   4 
   6  -4  -3 325.224 32.7308   1 
  -6   4   3 382.112 41.8210   1 
   5  -4  -3 503.126 37.0068   4 
  -5   4   3 507.352 42.8178   1 
   4  -4  -3 226.987 25.2710   1 
   4  -4  -3 263.328 25.0930   4 
  -4   4   3 305.270 30.7552   1 
   3  -4  -3 2510.34 97.4611   4 
   3  -4  -3 2351.05 95.5871   1 
  -3   4   3 2472.78 100.131   1 
   2  -4  -3 3592.73 126.691   4 
   2  -4  -3 3399.90 125.459   1 
  -2   4   3 3400.25 127.876   1 
   1  -4  -3 47.2921 9.64855   4 
  -1   4   3 35.2382 9.33251   4 
   0  -4  -3 5119.92 168.283   4 
   0   4   3 4938.67 172.242   1 
   0   4   3 4987.86 169.418   4 
  -1  -4  -3 753.096 29.1844   4 
   1   4   3 694.099 29.1483   4 
   1   4   3 672.954 39.9087   2 
   2   4   3 217.192 26.9448   2 
   2   4   3 301.818 20.7003   4 
   3   4   3 987.363 52.8226   2 
   4   4   3 -5.7610 11.5111   2 
   5   4   3 336.872 35.4647   2 
   5   4   3 325.572 32.8708   1 
   6   4   3 293.235 37.2831   2 
   6   4   3 229.675 43.5443   1 
   7   4   3 20.5879 17.0476   2 
   7   4   3 -0.9728 15.3704   1 
   7   4   3 -8.8609 10.9092   4 
   8   4   3 104.294 22.6028   4 
   8   4   3 66.9480 27.8031   2 
   8   4   3 106.564 31.7810   1 
   7  -5  -3 72.3375 19.9832   4 
   7  -5  -3 42.6271 20.5895   1 
   6  -5  -3 81.4799 20.1025   4 
   6  -5  -3 95.6190 21.1411   1 
  -6   5   3 94.7274 30.2647   1 
   5  -5  -3 311.299 32.5089   1 
   5  -5  -3 358.530 33.7328   4 
  -5   5   3 320.307 37.8077   1 
   4  -5  -3 13.1357 11.4724   1 
   4  -5  -3 -7.5847 8.96102   4 
  -4   5   3 2.84647 13.6700   1 
   3  -5  -3 337.395 27.2801   4 
   3  -5  -3 320.708 28.2207   1 
   2  -5  -3 1163.58 53.6910   1 
   2  -5  -3 1138.92 52.3430   4 
  -2   5   3 1132.01 55.0331   1 
   1  -5  -3 97.7032 15.0385   1 
   1  -5  -3 89.0736 19.0815   3 
   1  -5  -3 79.3436 12.0305   4 
  -1   5   3 75.0032 13.2979   1 
   0  -5  -3 2644.51 89.8540   4 
   0  -5  -3 2456.36 97.4002   3 
   0   5   3 2579.41 91.2583   4 
   0   5   3 2444.82 94.7102   1 
  -1  -5  -3 491.051 21.2795   4 
  -1  -5  -3 489.639 29.0326   3 
   1   5   3 509.645 28.5643   1 
   2   5   3 12.7956 12.8259   2 
   3   5   3 761.228 48.5972   2 
   3   5   3 694.360 30.3074   4 
   4   5   3 1176.30 65.0905   2 
   5   5   3 716.405 51.1689   2 
   6   5   3 494.175 45.5532   2 
   6   5   3 363.478 56.8685   1 
   6   5   3 407.001 28.3109   4 
   7   5   3 38.9097 20.6172   2 
   7   5   3 -10.568 17.3121   1 
   7   5   3 5.07929 8.12893   4 
   8   5   3 88.6758 31.7062   2 
   6  -6  -3 81.4883 22.2781   1 
   6  -6  -3 76.6046 17.6928   4 
   5  -6  -3 20.5670 12.6064   4 
   5  -6  -3 39.2269 15.8785   1 
   5  -6  -3 16.5200 30.4045   3 
  -5   6   3 -8.3953 19.6337   1 
   4  -6  -3 101.710 20.9741   1 
   4  -6  -3 134.900 20.6162   4 
   4  -6  -3 132.163 29.9279   3 
  -4   6   3 77.3665 22.1133   1 
   3  -6  -3 195.668 21.9714   4 
   3  -6  -3 150.893 27.1166   3 
   3  -6  -3 136.637 21.4145   1 
  -3   6   3 134.409 23.3709   1 
   2  -6  -3 856.415 62.1312   3 
   2  -6  -3 843.165 46.2633   1 
   2  -6  -3 921.401 44.9241   4 
   1  -6  -3 14.0008 11.0231   3 
   1  -6  -3 -2.4268 9.01108   1 
   1  -6  -3 8.94694 6.95016   4 
  -1   6   3 16.6556 9.30821   1 
   0  -6  -3 -0.8292 9.94945   3 
   0  -6  -3 7.50296 5.54148   4 
   0   6   3 -4.5736 8.37411   1 
  -1  -6  -3 33.4484 10.6180   3 
   1   6   3 14.0015 9.95741   1 
   3   6   3 678.513 48.5009   2 
   4   6   3 109.770 26.7153   2 
   5   6   3 562.281 52.8414   2 
   6   6   3 56.2396 22.8886   2 
   6   6   3 21.6286 9.95236   4 
   7   6   3 92.0801 25.4312   2 
   7   6   3 56.9365 24.5096   1 
   7   6   3 57.5274 15.3846   4 
   5  -7  -3 34.1141 26.9099   3 
   5  -7  -3 23.8624 12.6549   4 
   5  -7  -3 18.7368 16.3040   1 
  -5   7   3 -2.3986 20.7204   1 
   4  -7  -3 81.1094 24.6049   3 
   4  -7  -3 49.9124 14.8304   4 
   4  -7  -3 46.1173 17.7954   1 
  -4   7   3 53.6506 19.8105   1 
   3  -7  -3 10.4878 11.2785   1 
   3  -7  -3 16.4096 10.9578   4 
   3  -7  -3 9.54350 15.3739   3 
  -3   7   3 1.36255 13.5819   1 
  -3   7   3 31.3474 16.9791   2 
   2  -7  -3 -1.2611 8.20318   4 
   2  -7  -3 15.7603 11.1541   1 
   2  -7  -3 11.3645 14.3200   3 
  -2   7   3 -5.1636 9.74879   1 
   1  -7  -3 322.678 23.8112   4 
   1  -7  -3 326.430 28.5541   1 
  -1   7   3 383.843 31.0147   1 
   0  -7  -3 326.842 22.5592   4 
   0  -7  -3 319.846 30.9676   3 
   0   7   3 346.531 28.4034   1 
  -1  -7  -3 127.274 19.4253   3 
   1   7   3 156.622 21.2130   1 
  -2  -7  -3 2.38073 9.97238   3 
   2   7   3 6.12630 9.74874   1 
   5   7   3 13.3261 15.0469   2 
   6   7   3 110.071 27.7005   2 
   7   7   3 -14.338 21.6437   2 
   5  -8  -3 198.760 29.1532   4 
   5  -8  -3 225.563 33.6433   1 
   4  -8  -3 176.342 27.7936   1 
   4  -8  -3 258.118 39.3518   3 
   4  -8  -3 265.212 29.4195   4 
  -4   8   3 268.614 42.4740   2 
  -4   8   3 244.006 36.4754   1 
   3  -8  -3 64.5432 22.8620   3 
   3  -8  -3 84.0351 20.7778   1 
  -3   8   3 125.512 26.3487   1 
  -3   8   3 72.3666 24.4355   2 
   2  -8  -3 450.900 32.0609   4 
   2  -8  -3 427.553 42.6356   3 
   2  -8  -3 456.436 35.8616   1 
  -2   8   3 468.323 39.5462   1 
   1  -8  -3 1097.00 49.6160   4 
   1  -8  -3 1007.07 60.0846   3 
  -1   8   3 1063.67 58.8862   1 
   0  -8  -3 512.048 40.2287   3 
   0  -8  -3 543.602 27.9505   4 
   0   8   3 581.582 38.6266   1 
  -1  -8  -3 506.110 37.4558   3 
   1   8   3 516.937 36.0271   1 
  -2  -8  -3 30.2915 13.3220   3 
   2   8   3 25.6703 11.8418   1 
   3   8   3 30.3059 12.3176   1 
   4   8   3 316.382 39.1988   2 
   5   8   3 -3.5987 15.8859   2 
   6   8   3 201.559 41.0022   2 
   4  -9  -3 12.5361 18.7937   1 
   4  -9  -3 30.3484 17.2524   4 
  -4   9   3 66.5581 35.8664   2 
   3  -9  -3 12.7560 12.8964   4 
   3  -9  -3 -13.080 19.4529   3 
   3  -9  -3 26.4890 18.4049   1 
  -3   9   3 -31.078 19.5676   2 
  -3   9   3 18.9615 22.7019   1 
   2  -9  -3 283.918 26.6849   4 
   2  -9  -3 369.528 34.5956   1 
   2  -9  -3 346.899 40.5223   3 
  -2   9   3 193.580 31.3964   1 
   1  -9  -3 187.890 31.0490   3 
   1  -9  -3 227.483 21.0998   4 
  -1   9   3 199.069 29.6831   1 
   0  -9  -3 82.4165 21.1535   3 
   0   9   3 55.2331 18.6305   1 
  -1  -9  -3 158.341 25.5500   3 
   1   9   3 273.922 27.8119   1 
  -2  -9  -3 358.560 32.3377   3 
   2   9   3 297.074 30.5050   1 
  -3  -9  -3 78.3031 20.5539   3 
   3   9   3 99.0406 17.8167   1 
   3   9   3 78.8635 21.4837   3 
   4   9   3 749.929 58.9679   2 
   5   9   3 6.99225 23.6573   2 
   6   9   3 54.1770 38.4093   2 
   3 -10  -3 70.9206 21.7121   1 
   3 -10  -3 99.2618 21.2499   4 
   2 -10  -3 -6.7970 9.30144   4 
  -2  10   3 54.5007 36.2506   2 
  -2  10   3 -21.290 25.5403   1 
   1 -10  -3 115.499 16.6638   4 
   1 -10  -3 92.4468 27.0693   3 
  -1  10   3 80.9085 24.2200   1 
   0 -10  -3 113.744 24.0791   3 
   0  10   3 127.435 24.0409   1 
  -1 -10  -3 121.898 25.5591   3 
   1  10   3 180.379 27.1255   1 
  -2 -10  -3 27.1695 18.4393   3 
   2  10   3 -13.086 11.4147   1 
  -3 -10  -3 9.49640 13.2753   3 
   5  10   3 -34.947 24.7322   2 
   1 -11  -3 16.6248 11.4642   4 
   0 -11  -3 -16.015 17.5907   3 
   0  11   3 -19.085 22.2582   1 
  -1 -11  -3 -17.329 16.9277   3 
   1  11   3 -40.367 18.9545   1 
  -2 -11  -3 -2.7817 17.3937   3 
   2  11   3 -26.270 30.4143   1 
  -3 -11  -3 -18.471 14.3174   3 
  -4 -11  -3 -0.2835 19.8650   3 
   2   8  -4 -13.497 24.5594   3 
   1   8  -4 135.241 33.7963   3 
  -1  -8   4 144.565 20.5381   4 
   0   8  -4 14.6559 30.4098   3 
   0  -8   4 57.6606 18.5824   4 
   4   7  -4 -1.8885 28.3334   2 
   4   7  -4 -25.129 17.1773   3 
   3   7  -4 111.268 34.3794   2 
   3   7  -4 96.3510 26.6255   3 
  -3  -7   4 100.799 25.8992   3 
   2   7  -4 -22.718 20.1352   3 
  -2  -7   4 -8.2951 16.8350   3 
  -2  -7   4 13.8484 11.0330   4 
   1   7  -4 115.634 31.7852   2 
   1   7  -4 114.362 28.4819   3 
  -1  -7   4 96.8913 26.6539   3 
  -1  -7   4 141.343 19.9741   4 
   0   7  -4 29.7658 26.7248   3 
   0   7  -4 58.0357 30.9919   2 
   0  -7   4 23.9423 12.2697   4 
   0  -7   4 31.6621 19.7198   3 
  -1   7  -4 24.7829 27.4199   3 
   1  -7   4 29.9946 12.7258   4 
  -2   7  -4 40.9591 37.3258   3 
   2  -7   4 64.6164 16.8071   4 
   5   6  -4 77.1076 31.2107   2 
   5   6  -4 43.9663 23.4981   3 
   4   6  -4 17.9982 16.9063   3 
   4   6  -4 68.0462 26.8209   2 
  -4  -6   4 39.7790 19.3440   3 
   3   6  -4 36.3627 19.8328   3 
   3   6  -4 50.3714 25.7952   2 
  -3  -6   4 65.5300 13.4014   4 
  -3  -6   4 66.5366 21.5024   3 
   2   6  -4 143.580 26.9301   3 
   2   6  -4 133.300 29.8166   2 
  -2  -6   4 95.5035 24.3533   3 
  -2  -6   4 116.965 17.4129   4 
   1   6  -4 81.0920 29.0416   2 
   1   6  -4 86.5794 25.3982   3 
  -1  -6   4 79.8372 13.8863   4 
  -1  -6   4 72.6150 21.1266   3 
   0   6  -4 161.401 30.9063   3 
   0   6  -4 114.022 30.2927   2 
   0  -6   4 163.490 21.1454   4 
   0  -6   4 251.067 37.9274   3 
  -1   6  -4 73.5638 29.8164   2 
  -1   6  -4 82.7924 24.5952   3 
   1  -6   4 54.5604 22.0631   3 
   1  -6   4 59.4695 15.3583   4 
  -2   6  -4 2.00421 22.8911   3 
  -2   6  -4 -9.7215 20.6483   2 
   2  -6   4 45.9986 15.4881   4 
   2  -6   4 -0.3300 16.7173   3 
  -3   6  -4 21.7704 26.2700   2 
   3  -6   4 28.0577 22.4867   3 
   3  -6   4 3.66026 16.5744   1 
   4  -6   4 -32.493 18.1381   1 
   6   5  -4 32.3023 22.5691   3 
   6   5  -4 62.8589 14.3482   4 
   5   5  -4 433.059 28.0163   4 
   5   5  -4 474.725 44.4924   3 
   4   5  -4 151.117 27.2167   3 
   4   5  -4 185.534 35.4724   2 
   4   5  -4 185.297 18.0246   4 
  -4  -5   4 133.142 19.0084   4 
  -4  -5   4 165.049 29.2566   3 
   3   5  -4 232.830 38.3957   2 
   3   5  -4 237.214 34.1547   3 
  -3  -5   4 181.349 32.0942   3 
  -3  -5   4 243.476 20.5075   4 
   2   5  -4 352.675 39.7178   2 
   2   5  -4 370.814 36.9775   3 
  -2  -5   4 308.038 33.3548   3 
  -2  -5   4 339.707 23.6701   4 
   1   5  -4 48.0304 19.2440   3 
   1   5  -4 28.7645 17.3673   2 
  -1  -5   4 54.8342 15.9721   3 
  -1  -5   4 46.0611 12.8809   4 
   0   5  -4 716.958 58.7582   2 
   0   5  -4 717.028 51.3696   3 
   0  -5   4 800.473 52.9552   3 
   0  -5   4 736.897 38.8892   4 
  -1   5  -4 15.8580 13.3748   2 
  -1   5  -4 -3.1710 16.8220   3 
   1  -5   4 11.1767 10.6594   4 
   1  -5   4 20.0627 13.6017   3 
  -2   5  -4 12.5637 20.0017   3 
  -2   5  -4 34.9051 25.8318   2 
  -2   5  -4 40.3359 16.7806   1 
   2  -5   4 40.3109 19.0664   3 
   2  -5   4 46.5433 18.4693   1 
  -3   5  -4 582.026 55.3636   2 
  -3   5  -4 653.542 49.8791   1 
   3  -5   4 659.192 49.6804   3 
   3  -5   4 561.913 45.5905   1 
  -4   5  -4 65.0756 28.9873   2 
  -4   5  -4 46.5747 26.3098   1 
   4  -5   4 32.4118 20.4795   1 
   4  -5   4 -6.4918 18.4380   3 
   7   4  -4 124.050 30.3414   3 
   7   4  -4 124.484 19.1675   4 
   6   4  -4 159.835 18.4742   4 
   6   4  -4 185.804 31.9565   3 
   5   4  -4 306.724 34.7099   3 
   5   4  -4 323.139 23.9304   4 
  -5  -4   4 352.923 28.1248   4 
   4   4  -4 125.014 24.8479   3 
   4   4  -4 142.214 17.7705   4 
  -4  -4   4 177.842 18.8358   4 
   3   4  -4 591.301 44.2382   3 
   3   4  -4 587.106 32.1949   4 
   3   4  -4 614.322 50.5557   2 
  -3  -4   4 612.132 33.1467   4 
  -3  -4   4 594.171 45.5905   3 
   2   4  -4 78.8684 23.0590   2 
   2   4  -4 44.6682 15.9897   3 
  -2  -4   4 81.5100 13.6073   4 
  -2  -4   4 59.9192 16.8873   3 
   1   4  -4 91.3136 24.0263   2 
   1   4  -4 47.3673 17.8045   3 
  -1  -4   4 90.7792 14.9776   4 
  -1  -4   4 91.8156 21.1280   3 
   0   4  -4 269.372 39.7709   2 
   0   4  -4 166.647 27.3278   3 
   0  -4   4 238.482 19.9463   4 
   0  -4   4 190.376 27.7319   3 
  -1   4  -4 861.875 62.8362   2 
  -1   4  -4 790.814 54.4327   3 
   1  -4   4 934.705 53.6544   3 
   1  -4   4 847.676 44.2187   4 
  -2   4  -4 27.7542 15.5324   1 
  -2   4  -4 23.8898 17.9443   3 
  -2   4  -4 33.3089 21.9014   2 
   2  -4   4 45.8693 17.7128   3 
   2  -4   4 39.8601 15.0396   1 
  -3   4  -4 683.631 47.8009   1 
  -3   4  -4 675.500 58.2531   2 
   3  -4   4 710.551 61.2456   1 
   3  -4   4 740.629 49.5359   3 
  -4   4  -4 84.3574 25.9016   2 
   4  -4   4 112.112 25.7160   3 
   4  -4   4 112.750 23.5504   1 
  -5   4  -4 -25.903 20.4789   2 
   5  -4   4 -14.837 15.8377   1 
   7   3  -4 7.89891 9.71298   4 
   7   3  -4 39.1349 19.5594   3 
   6   3  -4 2.50654 7.14205   4 
   6   3  -4 2.37669 15.1225   3 
   5   3  -4 -2.4205 11.6936   3 
   5   3  -4 14.9207 8.64606   4 
  -5  -3   4 9.91153 10.7712   4 
   4   3  -4 33.1291 14.9468   3 
   4   3  -4 10.4499 8.25230   4 
  -4  -3   4 16.0992 10.3419   4 
   3   3  -4 9.73272 8.47973   4 
   3   3  -4 45.9660 18.8366   2 
   3   3  -4 19.8421 12.4586   3 
  -3  -3   4 22.3187 10.1300   4 
  -3  -3   4 2.27169 11.3768   3 
   2   3  -4 15.4192 15.4262   2 
   2   3  -4 20.5626 7.42225   4 
   2   3  -4 30.7145 14.9307   3 
  -2  -3   4 17.3616 13.4605   3 
  -2  -3   4 12.7554 8.36923   4 
   1   3  -4 414.293 32.3918   3 
   1   3  -4 366.719 36.9831   2 
  -1  -3   4 413.998 25.2942   4 
  -1  -3   4 443.292 33.9520   3 
   0   3  -4 1303.21 62.9665   3 
   0   3  -4 1239.83 70.3422   2 
   0  -3   4 1233.29 53.5882   4 
   0  -3   4 1223.93 62.3001   3 
  -1   3  -4 1364.14 105.575   2 
  -1   3  -4 1158.65 60.3678   3 
   1  -3   4 1044.93 51.8293   4 
   1  -3   4 1130.36 58.6968   3 
  -2   3  -4 142.136 22.4958   1 
  -2   3  -4 183.830 28.4608   3 
  -2   3  -4 123.875 27.5976   2 
   2  -3   4 177.537 25.1486   1 
   2  -3   4 164.264 26.7660   3 
  -3   3  -4 423.761 43.5719   2 
  -3   3  -4 432.057 43.3410   3 
   3  -3   4 435.222 37.2727   3 
   3  -3   4 437.375 36.5670   1 
  -4   3  -4 315.506 38.5933   2 
   4  -3   4 338.536 35.4061   1 
   4  -3   4 328.428 33.9820   3 
  -5   3  -4 0.67774 25.9987   2 
   5  -3   4 28.2672 16.4753   1 
   5  -3   4 -8.1962 17.0120   3 
  -6   3  -4 107.035 34.8901   2 
   6  -3   4 50.8510 24.4774   1 
   6  -3   4 50.4192 20.3773   3 
   7   2  -4 52.1748 14.4435   4 
   7   2  -4 22.9596 18.2484   3 
   6   2  -4 8.86277 12.1282   3 
   6   2  -4 40.4450 20.8901   4 
   5   2  -4 3.99009 8.97656   4 
  -5  -2   4 -1.7634 12.3134   4 
   4   2  -4 43.7402 15.4580   3 
   4   2  -4 52.7660 13.0757   4 
  -4  -2   4 54.4303 13.9065   4 
   3   2  -4 -3.8837 6.12749   4 
   3   2  -4 -8.4305 9.99159   2 
   3   2  -4 -10.141 7.49906   3 
  -3  -2   4 2.02271 7.95934   4 
   2   2  -4 -2.5320 10.0258   3 
   2   2  -4 -0.1125 5.82459   4 
   2   2  -4 9.49049 11.8497   2 
  -2  -2   4 6.96807 6.98597   4 
  -2  -2   4 -0.7146 10.0280   3 
   1   2  -4 161.966 22.5617   3 
   1   2  -4 159.611 26.9653   2 
   1   2  -4 177.042 16.5158   4 
  -1  -2   4 161.084 20.7258   3 
  -1  -2   4 167.804 15.5903   4 
   0   2  -4 168.775 22.6187   3 
   0   2  -4 226.009 27.2528   2 
   0  -2   4 190.271 21.6979   3 
   0  -2   4 184.243 16.8473   4 
  -1   2  -4 6.50873 12.2801   3 
  -1   2  -4 23.8963 14.0932   2 
   1  -2   4 19.4693 8.82055   4 
   1  -2   4 9.42637 11.2578   3 
   1  -2   4 9.92340 15.2991   2 
  -2   2  -4 910.642 51.6164   3 
  -2   2  -4 908.119 57.7327   2 
   2  -2   4 852.101 47.5237   3 
   2  -2   4 849.563 57.7808   2 
   2  -2   4 893.692 48.9212   1 
  -3   2  -4 269.939 33.4038   3 
  -3   2  -4 302.707 42.3791   2 
   3  -2   4 297.362 36.7465   2 
   3  -2   4 310.561 31.3067   1 
   3  -2   4 284.664 28.0362   3 
  -4   2  -4 18.1694 18.5667   2 
   4  -2   4 2.36818 15.4851   3 
   4  -2   4 8.65881 17.2293   2 
  -5   2  -4 30.7840 15.0560   2 
   5  -2   4 -6.7559 18.8649   2 
   5  -2   4 -9.7286 13.4643   1 
   5  -2   4 1.42057 14.0089   3 
  -6   2  -4 6.06454 18.0706   2 
   6  -2   4 0.26068 17.6408   1 
   6  -2   4 -17.004 16.2293   3 
   7   1  -4 228.247 26.6152   4 
   7   1  -4 314.306 37.5525   3 
   6   1  -4 58.5318 15.5878   4 
   6   1  -4 28.9058 18.4118   3 
   5   1  -4 28.9133 12.1531   4 
   5   1  -4 33.7103 16.8157   3 
  -5  -1   4 71.4623 17.9948   4 
   4   1  -4 2812.35 109.019   4 
   4   1  -4 2972.90 121.150   3 
  -4  -1   4 2892.45 112.266   4 
   3   1  -4 59.3701 11.1619   4 
   3   1  -4 53.8346 15.8929   3 
  -3  -1   4 56.9623 12.6760   4 
   2   1  -4 654.276 32.1179   4 
   2   1  -4 596.927 37.3188   2 
   2   1  -4 657.783 39.9297   3 
  -2  -1   4 615.728 32.7211   4 
   1   1  -4 670.492 32.1069   4 
   1   1  -4 651.849 37.7845   3 
   1   1  -4 620.360 40.5840   2 
  -1  -1   4 662.637 32.2467   4 
  -1  -1   4 609.581 37.7500   3 
   0   1  -4 145.764 24.6421   2 
   0   1  -4 128.884 18.1127   3 
   0  -1   4 121.953 18.1651   3 
   0  -1   4 115.306 14.2733   4 
   0  -1   4 162.495 25.6780   2 
  -1   1  -4 1871.38 86.4042   2 
  -1   1  -4 1866.15 76.8270   3 
   1  -1   4 1877.40 87.8457   2 
   1  -1   4 1907.05 74.9672   4 
   1  -1   4 1913.60 77.6449   3 
   1  -1   4 1956.50 76.4160   1 
  -2   1  -4 22.4044 12.5130   3 
  -2   1  -4 39.7406 17.0967   2 
   2  -1   4 26.8152 13.2110   1 
   2  -1   4 31.3036 16.2944   2 
   2  -1   4 42.5220 12.3976   3 
  -3   1  -4 2559.08 116.038   2 
   3  -1   4 2766.04 110.642   1 
   3  -1   4 2678.58 102.625   3 
   3  -1   4 2634.64 119.660   2 
  -4   1  -4 22.1671 16.2948   2 
   4  -1   4 1.94240 12.5539   1 
   4  -1   4 13.1493 11.0450   3 
   4  -1   4 21.8490 16.6259   2 
  -5   1  -4 139.576 32.9958   2 
   5  -1   4 74.6074 18.0178   3 
   5  -1   4 99.6329 22.0178   1 
  -6   1  -4 114.184 28.4924   2 
   6  -1   4 97.9808 27.9451   2 
   6  -1   4 119.964 28.3977   1 
  -7   1  -4 345.061 54.7234   2 
   7  -1   4 215.061 40.7410   2 
   7  -1   4 215.362 36.6808   1 
   7   0  -4 239.143 36.9279   3 
   7   0  -4 248.351 28.4654   4 
   6   0  -4 337.337 29.1874   4 
   6   0  -4 314.370 35.5400   3 
   5   0  -4 234.382 28.9505   3 
   5   0  -4 248.631 23.7139   4 
   4   0  -4 3026.91 113.202   4 
   4   0  -4 2929.24 121.208   3 
  -4   0   4 2877.45 114.033   4 
   3   0  -4 234.762 19.9025   4 
   3   0  -4 222.570 25.5060   3 
  -3   0   4 225.826 20.1369   4 
   2   0  -4 919.454 49.0238   3 
   2   0  -4 952.447 42.4895   4 
  -2   0   4 944.086 43.5560   4 
   1   0  -4 2260.17 83.0499   4 
   1   0  -4 2257.69 87.9138   3 
   1   0  -4 2194.95 87.9605   2 
  -1   0   4 2246.95 89.0204   2 
  -1   0   4 2226.62 82.4814   4 
  -1   0   4 2116.39 87.3551   3 
   0   0  -4 297.027 20.8538   4 
   0   0  -4 294.544 28.3644   2 
   0   0  -4 293.208 23.4555   3 
   0   0   4 279.673 23.9658   3 
   0   0   4 278.657 20.1044   4 
   0   0   4 306.338 29.8825   2 
  -1   0  -4 2733.84 111.785   3 
  -1   0  -4 2461.95 104.377   2 
   1   0   4 2502.73 105.562   2 
   1   0   4 2406.25 94.0938   3 
   1   0   4 2669.69 94.3132   4 
   1   0   4 2459.75 95.7215   1 
  -2   0  -4 246.940 26.3307   2 
   2   0   4 260.843 24.9567   1 
   2   0   4 267.811 30.1573   2 
   2   0   4 271.390 20.7791   3 
  -3   0  -4 255.350 35.1745   2 
   3   0   4 242.543 30.4830   2 
   3   0   4 207.801 27.6923   1 
  -4   0  -4 841.330 58.1208   2 
   4   0   4 842.817 50.9045   1 
   4   0   4 810.598 55.9066   2 
  -5   0  -4 477.214 43.1416   2 
   5   0   4 449.796 41.0982   1 
   5   0   4 481.218 42.5209   2 
  -6   0  -4 443.306 43.5878   2 
   6   0   4 401.224 41.6807   1 
   6   0   4 395.822 45.5592   2 
  -7   0  -4 545.952 51.9831   2 
   7   0   4 512.075 50.2380   2 
   7   0   4 589.368 60.4103   1 
   7  -1  -4 64.2953 18.3739   4 
   6  -1  -4 160.356 23.4238   4 
   5  -1  -4 0.87626 7.91176   4 
   4  -1  -4 369.427 28.2058   4 
  -4   1   4 390.743 29.4508   4 
   3  -1  -4 85.3414 14.6667   4 
  -3   1   4 81.7843 14.5319   4 
   2  -1  -4 194.786 17.6207   4 
  -2   1   4 182.048 17.8912   4 
   1  -1  -4 77.0046 11.5061   4 
   1  -1  -4 72.9628 15.0311   3 
   1  -1  -4 75.0034 14.8640   2 
  -1   1   4 99.2527 17.8659   2 
  -1   1   4 67.9030 10.9656   4 
   0  -1  -4 75.6606 11.9544   4 
   0  -1  -4 85.9511 13.5606   3 
   0  -1  -4 93.3601 16.6782   2 
   0   1   4 89.6696 11.8308   4 
   0   1   4 108.526 18.7876   2 
  -1  -1  -4 4118.80 154.679   2 
  -1  -1  -4 4168.54 143.796   3 
   1   1   4 4090.53 155.254   2 
   1   1   4 4420.05 146.177   4 
  -2  -1  -4 2207.29 95.1335   2 
   2   1   4 2296.70 96.9006   2 
  -3  -1  -4 148.033 27.0390   2 
   3   1   4 145.338 22.3776   1 
   3   1   4 176.180 29.4476   2 
  -4  -1  -4 1990.17 91.9311   2 
   4   1   4 1909.07 92.5686   2 
   4   1   4 1916.41 88.2050   1 
  -5  -1  -4 427.099 39.0994   2 
   5   1   4 406.869 40.1649   2 
  -6  -1  -4 168.827 30.5433   2 
   6   1   4 207.684 34.2812   2 
   6   1   4 218.271 34.4550   1 
  -7  -1  -4 360.504 41.2461   2 
   7   1   4 331.930 39.8358   2 
   7   1   4 248.507 39.4200   1 
   7  -2  -4 24.5859 15.4319   4 
   6  -2  -4 33.1194 15.9518   4 
   6  -2  -4 58.3583 16.3167   1 
   5  -2  -4 175.934 25.2835   4 
   4  -2  -4 4.70307 8.75555   4 
  -4   2   4 7.11493 8.99415   4 
  -4   2   4 11.3730 11.0477   1 
   3  -2  -4 -2.6335 5.91748   4 
  -3   2   4 12.1851 7.63976   4 
   2  -2  -4 10.8382 6.62488   4 
  -2   2   4 15.9677 9.05693   4 
   1  -2  -4 298.661 19.6668   4 
  -1   2   4 266.653 20.4703   4 
   0  -2  -4 330.854 19.9818   4 
   0  -2  -4 320.203 24.4470   2 
   0  -2  -4 325.311 21.7599   3 
   0   2   4 302.021 24.7503   2 
  -1  -2  -4 1290.72 60.8375   2 
   1   2   4 1261.51 61.1678   2 
   1   2   4 1397.10 52.5891   4 
  -2  -2  -4 63.0159 16.7238   2 
   2   2   4 55.6150 11.2966   4 
   2   2   4 55.6739 18.8063   2 
  -3  -2  -4 15.0342 12.6492   2 
   3   2   4 22.1379 15.6756   2 
  -4  -2  -4 281.634 30.3075   2 
   4   2   4 258.970 29.8828   1 
   4   2   4 278.772 37.2418   2 
  -5  -2  -4 12.9363 15.6455   2 
   5   2   4 -0.0561 11.3492   1 
   5   2   4 -2.5167 15.8013   2 
  -6  -2  -4 1.16345 17.4668   2 
   6   2   4 21.5538 16.3720   1 
  -7  -2  -4 24.8634 17.0452   2 
   7   2   4 12.2486 17.4004   1 
   7   2   4 -9.4311 17.2399   2 
   7  -3  -4 119.994 25.1705   1 
   7  -3  -4 81.4564 20.0991   4 
  -7   3   4 183.965 36.5990   1 
   6  -3  -4 290.281 30.3825   4 
   6  -3  -4 312.190 30.7661   1 
  -6   3   4 326.843 36.4914   1 
   5  -3  -4 158.337 24.2619   4 
   5  -3  -4 177.495 23.8515   1 
  -5   3   4 183.229 27.9677   1 
   4  -3  -4 805.913 46.4510   4 
   4  -3  -4 890.072 44.8133   1 
  -4   3   4 870.138 48.3519   1 
   3  -3  -4 573.069 34.7505   4 
   3  -3  -4 613.381 33.0195   1 
  -3   3   4 578.810 35.6921   4 
  -3   3   4 582.367 34.4904   1 
   2  -3  -4 466.795 26.5711   1 
   2  -3  -4 472.163 28.0693   4 
  -2   3   4 502.918 29.6713   4 
  -2   3   4 452.280 27.5685   1 
   1  -3  -4 1541.76 61.0872   4 
  -1   3   4 1562.66 62.1468   4 
  -1   3   4 1536.19 60.8156   1 
   0  -3  -4 24.6761 10.6227   4 
   0  -3  -4 39.5826 12.2245   2 
   0   3   4 22.8913 8.59894   4 
   0   3   4 27.9909 13.8250   2 
  -1  -3  -4 506.622 29.2344   4 
  -1  -3  -4 513.455 34.1312   2 
   1   3   4 533.596 35.4351   2 
   1   3   4 609.827 27.0801   4 
  -2  -3  -4 273.858 26.7507   2 
   2   3   4 290.948 19.5499   4 
   2   3   4 269.680 29.0921   2 
  -3  -3  -4 103.710 19.1788   2 
   3   3   4 104.507 23.0353   2 
  -4  -3  -4 575.602 41.7560   2 
   4   3   4 603.704 45.4828   2 
  -5  -3  -4 425.506 38.2646   2 
   5   3   4 371.865 37.1846   1 
   5   3   4 409.300 39.0024   2 
  -6  -3  -4 163.221 28.7227   2 
   6   3   4 183.604 32.9159   1 
   6   3   4 154.472 39.9494   2 
   7   3   4 45.6554 20.8136   1 
   7   3   4 35.8053 19.7998   2 
   7  -4  -4 169.032 31.0566   4 
   7  -4  -4 170.733 28.8790   1 
  -7   4   4 183.342 47.0017   1 
   6  -4  -4 376.716 36.7270   4 
   6  -4  -4 326.230 32.8932   1 
  -6   4   4 411.320 50.5034   1 
   5  -4  -4 15.5076 13.5299   1 
   5  -4  -4 11.3300 10.8791   4 
  -5   4   4 63.5825 16.5949   1 
   4  -4  -4 756.048 43.6262   4 
   4  -4  -4 702.349 41.8678   1 
   3  -4  -4 812.697 42.9993   4 
   3  -4  -4 759.104 40.8091   1 
  -3   4   4 774.242 44.1586   1 
   2  -4  -4 237.221 20.5627   4 
   2  -4  -4 251.905 21.0838   1 
  -2   4   4 260.122 21.9254   4 
  -2   4   4 242.303 22.7186   1 
   1  -4  -4 3091.13 111.320   4 
  -1   4   4 3091.75 112.279   2 
  -1   4   4 3058.09 111.941   4 
  -1   4   4 3092.01 112.840   1 
   0  -4  -4 143.898 20.8198   4 
   0   4   4 173.954 21.9824   2 
   0   4   4 180.605 15.8196   4 
   0   4   4 188.826 18.3060   1 
  -1  -4  -4 94.6692 11.2233   4 
   1   4   4 94.1664 18.9540   2 
   1   4   4 90.0323 11.3294   4 
   2   4   4 2418.00 102.604   2 
   2   4   4 2602.43 89.5167   4 
   3   4   4 218.364 28.5588   2 
   3   4   4 270.750 18.5007   4 
   4   4   4 1239.41 68.9318   2 
   5   4   4 575.929 42.8251   1 
   5   4   4 545.671 46.1472   2 
   6   4   4 -25.918 13.3560   1 
   6   4   4 -8.1055 17.3150   2 
   7   4   4 164.365 32.7895   2 
   7   4   4 135.129 30.4739   1 
   7  -5  -4 78.0378 31.6963   1 
   7  -5  -4 15.2289 16.0126   4 
   6  -5  -4 123.431 24.0251   4 
   6  -5  -4 148.211 25.4309   1 
  -6   5   4 187.346 50.4085   1 
   5  -5  -4 44.4039 15.1036   1 
   5  -5  -4 52.0758 15.8131   4 
  -5   5   4 16.5430 13.9518   1 
   4  -5  -4 16.3331 9.90161   4 
   4  -5  -4 12.2698 9.06824   1 
  -4   5   4 9.26192 13.2122   1 
   3  -5  -4 326.193 27.1954   4 
   3  -5  -4 331.689 27.1716   1 
  -3   5   4 305.012 47.1590   1 
   2  -5  -4 133.913 18.0000   4 
   2  -5  -4 103.893 16.8045   1 
  -2   5   4 95.4211 15.9189   4 
  -2   5   4 95.9248 17.3333   1 
   1  -5  -4 947.356 42.5382   4 
  -1   5   4 871.265 44.3571   1 
  -1   5   4 911.934 42.3765   4 
   0  -5  -4 507.693 26.9118   4 
   0   5   4 513.557 31.1608   1 
   0   5   4 570.549 34.7019   2 
   0   5   4 540.848 27.8845   4 
  -1  -5  -4 361.698 19.2942   4 
   1   5   4 338.161 19.3891   4 
   1   5   4 384.157 31.5919   2 
   2   5   4 2546.97 107.359   2 
   2   5   4 2660.12 92.3474   4 
   3   5   4 904.590 54.5109   2 
   3   5   4 929.621 38.0457   4 
   4   5   4 1249.35 51.1652   4 
   4   5   4 1183.60 67.0216   2 
   5   5   4 725.372 52.8772   2 
   6   5   4 120.985 29.5891   2 
   6   5   4 42.7010 19.0079   1 
   7   5   4 112.337 28.8974   1 
   7   5   4 120.569 27.8578   2 
   6  -6  -4 20.6375 14.5264   1 
   6  -6  -4 -3.3685 11.4818   4 
   5  -6  -4 -1.0083 12.3416   1 
   5  -6  -4 7.92200 11.2801   4 
  -5   6   4 5.31792 19.6638   1 
   4  -6  -4 66.2188 17.0358   4 
   4  -6  -4 48.4297 16.1038   1 
  -4   6   4 63.4900 19.3922   1 
   3  -6  -4 878.330 48.1067   4 
   3  -6  -4 896.326 48.6321   1 
  -3   6   4 873.304 52.2422   1 
   2  -6  -4 26.4768 13.0304   1 
   2  -6  -4 17.9061 9.24229   4 
  -2   6   4 34.8346 14.0080   1 
   1  -6  -4 271.163 31.8698   3 
   1  -6  -4 308.340 22.0034   4 
  -1   6   4 329.158 26.7648   1 
   0  -6  -4 96.1208 19.0980   3 
   0  -6  -4 102.694 12.5098   4 
   0   6   4 85.3780 12.0846   4 
   0   6   4 73.2628 12.9561   1 
  -1  -6  -4 13.4525 9.97470   3 
  -1  -6  -4 14.1836 5.24845   4 
   1   6   4 9.79304 10.1352   4 
   1   6   4 3.25053 7.50056   1 
   2   6   4 511.300 39.1422   2 
   3   6   4 206.076 32.0350   2 
   4   6   4 359.896 20.6176   4 
   4   6   4 387.514 38.0992   2 
   5   6   4 27.3144 9.23961   4 
   5   6   4 48.0281 20.9756   2 
   6   6   4 182.477 35.2024   2 
   7   6   4 33.4400 26.8117   2 
   7   6   4 53.2304 15.1663   4 
   7   6   4 46.1547 23.8559   1 
   6  -7  -4 85.9884 24.1174   1 
   6  -7  -4 41.9938 17.5391   4 
   5  -7  -4 34.6286 15.8568   1 
   5  -7  -4 23.0561 26.8300   3 
   5  -7  -4 27.3261 17.9192   4 
  -5   7   4 43.7137 22.4262   1 
   4  -7  -4 -24.405 21.1717   3 
   4  -7  -4 2.83650 10.0701   4 
   4  -7  -4 7.46990 11.7924   1 
  -4   7   4 -1.6065 15.9818   1 
   3  -7  -4 30.1028 13.7857   1 
   3  -7  -4 11.4443 17.5800   3 
   3  -7  -4 17.6689 10.9774   4 
  -3   7   4 25.4600 13.3533   1 
   2  -7  -4 1033.96 61.9375   3 
   2  -7  -4 1124.52 51.9221   4 
   2  -7  -4 1013.41 54.0606   1 
  -2   7   4 951.123 55.8173   1 
   1  -7  -4 152.910 17.0156   4 
   1  -7  -4 170.996 24.8908   3 
  -1   7   4 125.023 20.1812   1 
   0  -7  -4 89.4317 17.3457   3 
   0  -7  -4 108.608 13.1067   4 
   0   7   4 107.083 20.9313   1 
  -1  -7  -4 13.3113 10.1081   3 
   1   7   4 8.94019 10.0764   1 
   2   7   4 102.069 17.5632   1 
   2   7   4 106.815 24.3144   2 
   3   7   4 10.0592 17.9176   2 
   4   7   4 57.5667 22.5966   2 
   5   7   4 100.937 28.4007   2 
   6   7   4 47.6795 21.7867   2 
   7   7   4 26.2896 24.3583   2 
   7   7   4 16.1602 10.0915   4 
   7   7   4 5.81889 20.0610   1 
   7   7   4 -23.903 11.4366   4 
   5  -8  -4 133.234 24.2711   1 
   5  -8  -4 133.959 26.0446   4 
   4  -8  -4 -6.1247 15.5893   1 
   4  -8  -4 38.7602 21.9106   3 
   4  -8  -4 14.5411 13.4266   4 
  -4   8   4 -9.2413 18.1747   1 
   3  -8  -4 215.945 36.3311   4 
   3  -8  -4 273.581 29.5336   1 
   3  -8  -4 334.177 39.3980   3 
  -3   8   4 296.878 36.1468   1 
   2  -8  -4 393.110 31.8856   1 
   2  -8  -4 426.202 41.2194   3 
   2  -8  -4 399.203 29.6893   4 
  -2   8   4 369.147 35.6804   1 
   1  -8  -4 731.936 38.1136   4 
   1  -8  -4 701.623 50.0525   3 
  -1   8   4 697.111 45.5522   1 
   0  -8  -4 520.406 26.9098   4 
   0   8   4 480.254 35.8726   1 
  -1  -8  -4 22.2409 12.9367   3 
   1   8   4 23.3813 12.9080   1 
   2   8   4 249.563 25.5884   1 
   3   8   4 261.934 39.1078   2 
   4   8   4 38.3566 21.3612   2 
   5   8   4 327.067 41.2990   2 
   6   8   4 130.377 29.2425   2 
   4  -9  -4 33.9558 16.5963   1 
   4  -9  -4 27.2637 16.0971   4 
   3  -9  -4 118.997 27.8123   3 
   3  -9  -4 98.1740 18.8745   4 
   3  -9  -4 106.611 22.8017   1 
  -3   9   4 101.839 28.1892   2 
  -3   9   4 94.3904 24.2746   1 
   2  -9  -4 121.362 27.4669   3 
   2  -9  -4 140.043 19.7173   4 
  -2   9   4 110.423 21.6238   1 
   1  -9  -4 118.374 17.4495   4 
   1  -9  -4 82.3760 20.9195   3 
  -1   9   4 106.920 19.5599   1 
   0  -9  -4 120.282 22.5291   3 
   0   9   4 102.954 18.9843   1 
  -1  -9  -4 64.6614 19.2110   3 
   1   9   4 101.920 20.2012   1 
  -2  -9  -4 52.0244 15.9946   3 
   2   9   4 72.5057 17.9599   1 
   3   9   4 1143.10 59.9922   1 
   3   9   4 1226.35 74.1774   2 
   4   9   4 10.3449 22.6511   2 
   4   9   4 6.48057 13.3935   1 
   5   9   4 262.015 45.6149   2 
   3 -10  -4 59.0767 16.7335   4 
   3 -10  -4 48.9261 22.5823   1 
  -3  10   4 73.7090 31.7792   2 
   2 -10  -4 -6.4173 20.5295   3 
   2 -10  -4 22.4896 11.4665   4 
  -2  10   4 41.8579 23.1958   1 
   1 -10  -4 33.0729 7.96502   4 
   1 -10  -4 64.8094 23.6516   3 
  -1  10   4 -9.4691 15.6762   1 
   0 -10  -4 338.689 38.4158   3 
   0  10   4 323.797 38.7592   1 
  -1 -10  -4 80.4905 19.2446   3 
   1  10   4 59.6733 18.5986   1 
  -2 -10  -4 49.2469 17.8265   3 
   2  10   4 2.15257 16.4984   1 
   3  10   4 254.594 30.3433   1 
   4  10   4 18.1935 23.5635   2 
   4  10   4 1.25590 14.7522   1 
   5  10   4 14.4849 28.8676   1 
   5  10   4 17.8036 29.5054   2 
   1 -11  -4 3.99739 10.1417   4 
   0 -11  -4 -11.623 14.3609   3 
   0  11   4 22.0283 23.8078   1 
  -1 -11  -4 18.7945 19.5343   3 
   1  11   4 19.0770 18.0726   1 
  -2 -11  -4 14.4085 16.4236   3 
   2  11   4 -6.7748 16.0701   1 
  -3 -11  -4 4.96455 16.2156   3 
   4  11   4 18.9186 18.3689   1 
   4  11   4 4.89487 25.3703   2 
   3   7  -5 -15.465 21.4295   3 
  -3  -7   5 35.6733 15.1633   4 
   2   7  -5 90.4345 30.2847   3 
  -2  -7   5 130.646 20.0749   4 
   1   7  -5 1.11028 21.4367   3 
  -1  -7   5 13.0309 12.1793   4 
   0   7  -5 -37.639 20.4990   3 
   0  -7   5 -27.386 11.9386   4 
  -1   7  -5 23.2459 30.4288   3 
   1  -7   5 94.5261 19.5349   4 
   4   6  -5 -23.091 18.8538   3 
   4   6  -5 -33.953 23.2243   2 
  -4  -6   5 -9.8366 11.5255   4 
   3   6  -5 15.2521 21.5055   3 
   3   6  -5 38.5272 26.6845   2 
  -3  -6   5 48.7894 14.2536   4 
  -3  -6   5 37.0581 19.5593   3 
   2   6  -5 -3.8258 18.6358   2 
   2   6  -5 12.6432 20.4096   3 
  -2  -6   5 12.2267 15.9776   4 
  -2  -6   5 18.9496 16.6074   3 
   1   6  -5 254.783 42.5744   2 
   1   6  -5 171.534 30.0822   3 
  -1  -6   5 198.734 22.4284   4 
  -1  -6   5 191.696 35.5507   3 
   0   6  -5 83.1280 28.9217   3 
   0   6  -5 90.4328 30.4680   2 
   0  -6   5 40.8993 13.3857   4 
   0  -6   5 50.7526 19.9682   3 
  -1   6  -5 22.6137 28.6012   2 
  -1   6  -5 88.7796 26.9984   3 
   1  -6   5 41.7765 13.2396   4 
   1  -6   5 52.9706 24.8147   3 
  -2   6  -5 246.868 44.5818   3 
   2  -6   5 226.740 47.2239   4 
   3  -6   5 -6.1953 21.0569   1 
   5   5  -5 69.2696 20.4789   3 
   5   5  -5 84.2819 28.3159   2 
   5   5  -5 46.6341 12.1185   4 
  -5  -5   5 76.2594 19.2459   4 
   4   5  -5 336.179 39.3609   3 
   4   5  -5 312.983 48.0141   2 
  -4  -5   5 266.544 29.6711   4 
   3   5  -5 253.584 43.7786   2 
   3   5  -5 223.347 34.4403   3 
  -3  -5   5 325.900 25.2148   4 
  -3  -5   5 296.603 34.4678   3 
   2   5  -5 -3.8214 18.9855   2 
   2   5  -5 14.4763 16.0733   3 
  -2  -5   5 18.4712 14.4010   3 
  -2  -5   5 -4.6464 9.47263   4 
   1   5  -5 833.841 65.3482   2 
   1   5  -5 833.054 55.6242   3 
  -1  -5   5 903.361 60.0436   3 
  -1  -5   5 880.441 51.0435   4 
   0   5  -5 1.31344 17.0436   3 
   0   5  -5 36.2982 22.5836   2 
   0  -5   5 5.40449 10.4816   4 
   0  -5   5 2.19000 14.4305   3 
  -1   5  -5 21.5429 21.8416   2 
  -1   5  -5 45.2549 24.0843   3 
   1  -5   5 49.1555 16.1058   4 
   1  -5   5 102.466 24.4021   3 
  -2   5  -5 150.640 37.7737   2 
  -2   5  -5 167.466 34.4497   3 
   2  -5   5 155.778 22.5460   4 
   2  -5   5 142.211 36.7624   3 
  -3   5  -5 -22.091 21.5460   2 
   3  -5   5 -3.5504 16.6047   3 
   3  -5   5 -0.5398 14.4035   4 
   3  -5   5 -9.3071 16.7154   1 
   4  -5   5 -8.7136 20.0628   1 
   6   4  -5 98.4213 28.2289   3 
   6   4  -5 93.8950 17.6345   4 
   5   4  -5 1.22541 16.1529   3 
   5   4  -5 22.9389 20.9444   2 
   5   4  -5 19.3534 10.3211   4 
  -5  -4   5 33.8883 12.5517   4 
   4   4  -5 728.171 54.0976   2 
   4   4  -5 664.156 36.5148   4 
   4   4  -5 671.508 50.2478   3 
  -4  -4   5 606.036 40.2526   4 
   3   4  -5 253.182 32.3470   2 
   3   4  -5 220.230 22.1372   4 
   3   4  -5 258.628 31.2431   3 
  -3  -4   5 166.649 29.8332   3 
  -3  -4   5 205.053 21.1606   4 
   2   4  -5 14.2142 16.5697   2 
   2   4  -5 1.47292 13.6873   3 
  -2  -4   5 15.9928 15.7316   3 
  -2  -4   5 -3.3655 7.41124   4 
   1   4  -5 444.085 46.2183   2 
   1   4  -5 369.921 36.9462   3 
  -1  -4   5 428.760 28.7892   4 
  -1  -4   5 424.652 38.4485   3 
   0   4  -5 770.662 60.4981   2 
   0   4  -5 723.271 52.6359   3 
   0  -4   5 821.048 53.0663   3 
   0  -4   5 742.959 44.5885   4 
  -1   4  -5 33.8981 21.3935   2 
  -1   4  -5 22.4142 18.2038   3 
   1  -4   5 22.6471 13.2739   4 
   1  -4   5 13.5141 14.8326   3 
  -2   4  -5 577.854 49.1301   3 
  -2   4  -5 539.118 54.0685   2 
   2  -4   5 481.381 36.8895   4 
   2  -4   5 629.087 44.2560   3 
  -3   4  -5 203.066 38.0505   2 
  -3   4  -5 172.950 31.8758   3 
   3  -4   5 170.114 29.1109   1 
   3  -4   5 176.543 30.7721   3 
  -4   4  -5 -19.587 21.3360   2 
   4  -4   5 -9.7101 15.4804   1 
   4  -4   5 -13.796 16.4313   3 
   5  -4   5 381.155 46.6076   1 
   5  -4   5 342.540 44.2848   3 
   7   3  -5 -12.906 18.8950   3 
   6   3  -5 106.030 26.3508   3 
   6   3  -5 107.618 18.4478   4 
   5   3  -5 6.20772 7.98645   4 
   5   3  -5 6.67168 14.5921   3 
  -5  -3   5 27.1246 12.5952   4 
   4   3  -5 145.689 26.1154   2 
   4   3  -5 123.667 25.8391   3 
   4   3  -5 150.979 19.3963   4 
  -4  -3   5 170.808 23.1652   4 
   3   3  -5 23.3030 25.5957   3 
   3   3  -5 4.21657 7.70252   4 
   3   3  -5 15.5635 13.1276   2 
  -3  -3   5 14.8880 10.6253   3 
  -3  -3   5 3.99341 9.42182   4 
   2   3  -5 306.482 40.6719   2 
   2   3  -5 190.353 29.1471   3 
   2   3  -5 258.089 21.7103   4 
  -2  -3   5 222.808 22.1748   4 
  -2  -3   5 248.202 29.9668   3 
   1   3  -5 332.345 32.2073   3 
   1   3  -5 322.417 38.2965   2 
  -1  -3   5 334.600 25.3297   4 
  -1  -3   5 370.278 34.1043   3 
   0   3  -5 691.216 52.2573   2 
   0   3  -5 603.802 43.8588   3 
   0  -3   5 642.227 44.2240   3 
   0  -3   5 606.593 35.8644   4 
  -1   3  -5 256.251 32.7697   3 
  -1   3  -5 271.209 34.1777   2 
   1  -3   5 277.021 24.2697   4 
   1  -3   5 246.529 29.9337   3 
  -2   3  -5 173.972 33.6693   2 
  -2   3  -5 121.218 26.5243   3 
   2  -3   5 127.708 22.7007   1 
   2  -3   5 135.636 23.1264   3 
   2  -3   5 131.555 21.3030   4 
  -3   3  -5 195.083 32.5198   3 
  -3   3  -5 225.328 41.5184   2 
   3  -3   5 350.562 59.2455   1 
   3  -3   5 212.920 30.4487   3 
  -4   3  -5 165.899 34.2553   2 
   4  -3   5 133.898 23.6967   3 
   4  -3   5 165.622 30.2394   1 
  -5   3  -5 203.050 42.6123   2 
   5  -3   5 231.068 34.1422   3 
   5  -3   5 260.089 38.2254   1 
   7   2  -5 43.2242 14.3243   4 
   7   2  -5 36.4886 20.6122   3 
   6   2  -5 42.7589 18.7486   3 
   6   2  -5 28.3528 10.5925   4 
   5   2  -5 184.191 30.5714   3 
   5   2  -5 213.630 21.5504   4 
  -5  -2   5 196.441 26.0285   4 
   4   2  -5 11.0428 8.31577   4 
   4   2  -5 14.8190 18.9726   3 
  -4  -2   5 3.59272 10.9703   4 
   3   2  -5 4.87146 13.1400   3 
   3   2  -5 28.4095 14.9644   2 
   3   2  -5 18.8698 8.72665   4 
  -3  -2   5 23.4291 10.3829   4 
   2   2  -5 18.6647 13.6801   2 
   2   2  -5 23.2454 10.4894   4 
   2   2  -5 26.8622 12.4213   3 
  -2  -2   5 5.71968 14.7337   3 
  -2  -2   5 5.42590 7.69761   4 
   1   2  -5 -4.3108 9.54086   3 
   1   2  -5 4.60008 11.8165   2 
  -1  -2   5 9.02143 10.0377   3 
  -1  -2   5 10.0107 8.08299   4 
   0   2  -5 42.4101 16.0628   2 
   0   2  -5 30.9724 14.8193   3 
   0  -2   5 20.6502 8.14854   4 
   0  -2   5 10.5990 11.0343   3 
  -1   2  -5 168.119 25.0065   3 
  -1   2  -5 180.555 37.0741   2 
   1  -2   5 209.904 27.2813   3 
   1  -2   5 184.323 20.9350   4 
  -2   2  -5 451.317 37.5407   3 
  -2   2  -5 404.915 40.5274   2 
   2  -2   5 399.012 32.6212   3 
   2  -2   5 446.456 35.9784   1 
   2  -2   5 440.418 44.9247   2 
   2  -2   5 377.353 30.1035   4 
  -3   2  -5 31.9778 22.3794   2 
  -3   2  -5 72.9381 22.3187   3 
   3  -2   5 79.9707 20.8623   1 
   3  -2   5 41.7859 26.3770   3 
  -4   2  -5 88.1966 26.1555   2 
   4  -2   5 94.8746 23.8603   1 
   4  -2   5 115.558 29.7497   2 
   4  -2   5 78.2347 18.6577   3 
  -5   2  -5 20.3335 20.9275   2 
   5  -2   5 37.3011 19.7119   3 
   5  -2   5 -15.153 20.8684   2 
   5  -2   5 -17.723 15.0038   1 
  -6   2  -5 -1.9528 27.8963   2 
   6  -2   5 -11.422 18.3598   1 
   6  -2   5 34.8045 24.8925   2 
   6  -2   5 -27.029 18.4551   3 
   7   1  -5 -2.1968 9.28660   4 
   7   1  -5 -13.729 18.4909   3 
   6   1  -5 35.1066 11.7626   4 
   6   1  -5 32.3712 18.7131   3 
   5   1  -5 870.254 47.7198   4 
   5   1  -5 964.863 59.8282   3 
  -5  -1   5 938.667 52.2963   4 
   4   1  -5 87.0395 21.0987   3 
   4   1  -5 123.506 18.4482   4 
  -4  -1   5 121.352 24.8039   4 
   3   1  -5 628.062 35.6775   4 
   3   1  -5 731.222 46.6498   3 
  -3  -1   5 695.839 39.1918   4 
   2   1  -5 168.566 24.7933   3 
   2   1  -5 211.657 18.5951   4 
   2   1  -5 194.226 26.8661   2 
  -2  -1   5 202.108 18.7521   4 
   1   1  -5 88.9477 17.2351   3 
   1   1  -5 93.8957 14.3925   4 
   1   1  -5 104.187 22.2319   2 
  -1  -1   5 78.4448 14.6153   4 
  -1  -1   5 72.3409 16.8897   3 
   0   1  -5 1207.28 58.3100   3 
   0   1  -5 1241.36 65.3579   2 
   0  -1   5 1181.36 58.5644   3 
   0  -1   5 1207.34 66.5357   2 
   0  -1   5 1244.45 54.0998   4 
  -1   1  -5 656.452 47.4871   2 
  -1   1  -5 668.283 39.3192   3 
   1  -1   5 648.935 39.1350   3 
   1  -1   5 609.435 35.5648   4 
   1  -1   5 697.607 38.2374   1 
   1  -1   5 673.726 49.3295   2 
  -2   1  -5 1442.84 79.7483   2 
  -2   1  -5 1537.16 68.9156   3 
   2  -1   5 1522.15 67.3546   3 
   2  -1   5 1515.16 81.9754   2 
   2  -1   5 1411.65 65.8039   4 
   2  -1   5 1516.45 70.0068   1 
  -3   1  -5 27.2192 16.3602   3 
  -3   1  -5 42.1995 20.8052   2 
   3  -1   5 37.0133 20.2965   2 
   3  -1   5 34.0978 14.1304   3 
   3  -1   5 10.3843 13.4051   1 
  -4   1  -5 38.4309 20.7841   2 
   4  -1   5 64.4104 26.8351   2 
   4  -1   5 26.1392 19.3682   1 
   4  -1   5 37.1902 13.7876   3 
  -5   1  -5 115.985 28.6171   2 
   5  -1   5 140.153 32.1124   2 
   5  -1   5 134.668 29.0792   1 
  -6   1  -5 210.001 57.2827   2 
   6  -1   5 172.997 39.8535   2 
   6  -1   5 150.232 30.7573   1 
   7   0  -5 36.9233 12.6840   4 
   7   0  -5 81.6654 23.3468   3 
   6   0  -5 86.0209 18.5501   4 
   6   0  -5 67.3818 20.0524   3 
   5   0  -5 634.533 40.2555   4 
   5   0  -5 726.715 50.3662   3 
  -5   0   5 698.853 43.5199   4 
   4   0  -5 549.205 33.6559   4 
   4   0  -5 504.190 41.1859   3 
  -4   0   5 564.564 44.7655   4 
   3   0  -5 381.970 33.9054   3 
   3   0  -5 419.671 27.0680   4 
  -3   0   5 377.445 28.6030   4 
   2   0  -5 996.623 46.5600   4 
   2   0  -5 1089.02 55.6995   3 
   2   0  -5 1018.25 50.3439   2 
  -2   0   5 1009.12 48.2551   4 
   1   0  -5 41.3629 9.28328   4 
   1   0  -5 39.1768 14.0568   2 
   1   0  -5 38.9967 12.5516   3 
  -1   0   5 40.1351 16.2773   2 
  -1   0   5 24.7579 10.5096   3 
  -1   0   5 31.0226 9.84324   4 
   0   0  -5 5159.82 194.088   2 
   0   0  -5 5399.97 186.689   3 
   0   0  -5 5161.93 184.628   4 
   0   0   5 5203.94 187.692   3 
   0   0   5 5233.83 183.278   4 
   0   0   5 5573.74 197.398   2 
  -1   0  -5 795.885 40.2956   3 
  -1   0  -5 724.448 48.2643   2 
   1   0   5 802.655 51.6519   2 
   1   0   5 814.047 40.9842   3 
   1   0   5 770.946 38.7844   4 
  -2   0  -5 264.347 31.3273   2 
  -2   0  -5 291.918 25.7080   3 
   2   0   5 275.965 38.3181   2 
   2   0   5 311.984 24.0502   3 
   2   0   5 276.479 23.4658   4 
   2   0   5 265.640 27.2625   1 
   3   0   5 1008.67 55.9425   1 
   3   0   5 917.076 61.3464   2 
  -4   0  -5 492.596 44.7366   2 
   4   0   5 474.320 45.9650   2 
   4   0   5 529.284 42.0012   1 
  -5   0  -5 409.791 41.1977   2 
   5   0   5 333.854 41.6117   2 
   5   0   5 414.398 39.6875   1 
  -6   0  -5 341.708 49.8007   2 
   6   0   5 244.635 41.1669   2 
   6   0   5 232.896 37.6413   1 
  -7   0  -5 42.2991 26.6638   2 
   7   0   5 45.3926 21.6997   1 
   7   0   5 86.2019 34.7287   2 
   7  -1  -5 3.17216 11.8191   4 
   7  -1  -5 2.23249 15.2310   3 
   6  -1  -5 107.940 22.8640   3 
   6  -1  -5 64.6390 16.8661   4 
   5  -1  -5 286.735 32.0351   3 
  -5   1   5 319.713 29.9625   4 
   4  -1  -5 57.0450 17.6825   3 
   4  -1  -5 44.0035 12.4332   4 
  -4   1   5 54.2243 15.0825   4 
   3  -1  -5 295.771 29.5701   3 
   3  -1  -5 315.659 23.3969   4 
  -3   1   5 331.763 26.4019   4 
   2  -1  -5 1415.16 65.9855   3 
   2  -1  -5 1381.52 58.9872   4 
  -2   1   5 1371.28 60.2406   4 
   1  -1  -5 66.2035 14.9068   2 
   1  -1  -5 52.7962 12.9439   3 
   1  -1  -5 58.1311 11.8624   4 
  -1   1   5 49.0244 10.7553   4 
  -1   1   5 61.0898 19.6304   2 
   0  -1  -5 2339.14 97.8755   2 
   0  -1  -5 2487.86 93.2430   3 
   0  -1  -5 2401.24 90.6799   4 
   0   1   5 2420.81 90.3104   4 
   0   1   5 2400.49 99.1025   2 
  -1  -1  -5 287.383 28.0743   2 
   1   1   5 306.613 20.8816   4 
   1   1   5 303.569 30.6423   2 
   1   1   5 307.865 21.9841   3 
  -2  -1  -5 141.704 25.2247   2 
   2   1   5 128.841 16.9089   4 
   2   1   5 144.544 25.8802   2 
   2   1   5 170.598 22.7594   1 
  -3  -1  -5 1133.67 65.5573   2 
   3   1   5 1206.12 68.2071   2 
   3   1   5 1237.94 62.1432   1 
  -4  -1  -5 11.0367 13.2830   2 
   4   1   5 20.8349 13.8850   1 
   4   1   5 15.2100 17.3147   2 
  -5  -1  -5 289.731 35.3398   2 
   5   1   5 224.738 32.7448   1 
   5   1   5 194.696 47.9050   2 
  -6  -1  -5 503.165 44.1520   2 
   6   1   5 503.077 47.0423   1 
   6   1   5 348.140 42.3503   2 
  -7  -1  -5 -11.712 24.9659   2 
   7   1   5 -16.765 22.0027   2 
   7  -2  -5 -6.9789 13.6542   4 
   6  -2  -5 161.937 25.0479   4 
   5  -2  -5 88.9441 17.6636   4 
   4  -2  -5 69.4949 13.7607   4 
  -4   2   5 66.7343 17.6892   4 
   3  -2  -5 323.216 24.9877   4 
  -3   2   5 339.853 25.7949   4 
   2  -2  -5 115.772 15.3700   4 
  -2   2   5 138.305 17.4984   4 
   1  -2  -5 120.519 18.6878   3 
   1  -2  -5 121.363 17.3788   2 
   1  -2  -5 126.411 15.7127   4 
  -1   2   5 112.155 14.4706   4 
  -1   2   5 163.318 21.2182   2 
   0  -2  -5 142.520 21.4042   2 
   0  -2  -5 156.117 16.7420   4 
   0   2   5 145.776 15.7934   4 
   0   2   5 145.299 23.4393   2 
  -1  -2  -5 242.777 25.2804   2 
   1   2   5 218.981 26.9061   2 
   1   2   5 211.300 18.0524   4 
  -2  -2  -5 219.290 26.7629   2 
   2   2   5 212.300 27.3263   2 
   2   2   5 218.149 19.0298   4 
  -3  -2  -5 17.0791 9.93830   2 
   3   2   5 6.89552 13.4496   2 
  -4  -2  -5 -1.3748 13.8064   2 
   4   2   5 26.3139 15.1112   2 
   4   2   5 36.5176 14.0368   1 
  -5  -2  -5 45.3142 19.9206   2 
   5   2   5 68.4156 20.4148   1 
   5   2   5 65.8582 23.0380   2 
  -6  -2  -5 131.084 28.6003   2 
   6   2   5 91.7098 27.8118   2 
   6   2   5 109.121 24.7770   1 
  -7  -2  -5 -35.312 43.4427   2 
   7   2   5 40.9212 23.3179   1 
   7   2   5 49.2729 22.2407   2 
  -7   3   5 80.9033 25.6868   1 
   6  -3  -5 188.993 27.5130   4 
   5  -3  -5 370.527 32.7922   4 
  -5   3   5 477.014 37.8883   1 
   4  -3  -5 199.494 26.4000   4 
  -4   3   5 222.908 24.3402   1 
  -4   3   5 208.517 24.0572   4 
   3  -3  -5 33.5151 9.59457   4 
  -3   3   5 25.7138 11.0340   4 
  -3   3   5 61.6960 14.7346   1 
   2  -3  -5 2734.70 102.335   4 
  -2   3   5 2660.76 103.420   4 
  -2   3   5 2669.39 99.7039   1 
   1  -3  -5 64.8175 11.4087   4 
   1  -3  -5 87.7717 13.5202   2 
  -1   3   5 85.6806 12.5680   4 
  -1   3   5 74.7768 12.8143   1 
   0  -3  -5 1216.20 50.4896   4 
   0  -3  -5 1193.07 54.9203   2 
   0   3   5 1149.67 49.6344   4 
   0   3   5 1182.96 56.4887   2 
  -1  -3  -5 486.453 26.8618   4 
  -1  -3  -5 424.250 31.7134   2 
   1   3   5 435.467 24.7407   4 
   1   3   5 371.217 32.8220   2 
  -2  -3  -5 81.4756 20.2848   2 
   2   3   5 50.0362 9.23176   4 
   2   3   5 51.0861 18.6360   2 
  -3  -3  -5 16.9471 13.1042   2 
   3   3   5 34.4249 10.2966   4 
   3   3   5 11.7786 16.4049   2 
  -4  -3  -5 306.178 32.8893   2 
   4   3   5 326.630 33.7388   2 
  -5  -3  -5 49.6513 20.3415   2 
   5   3   5 17.0237 17.3515   2 
   5   3   5 29.9126 14.5883   1 
  -6  -3  -5 25.4245 19.5914   2 
   6   3   5 2.63004 15.4804   1 
   6   3   5 -10.886 19.2659   2 
  -7  -3  -5 19.3002 35.9258   2 
   7   3   5 76.4595 29.2918   2 
   7   3   5 52.1745 21.0068   1 
   7  -4  -5 184.703 29.2908   4 
   7  -4  -5 279.859 30.9433   1 
  -7   4   5 242.330 46.8374   1 
   6  -4  -5 15.1212 11.8750   4 
   6  -4  -5 -3.3121 11.5630   1 
  -6   4   5 -15.949 18.4866   1 
   5  -4  -5 358.606 31.7490   4 
   5  -4  -5 393.033 31.2947   1 
  -5   4   5 337.277 35.9805   1 
   4  -4  -5 278.851 25.5626   1 
   4  -4  -5 230.147 24.4310   4 
   3  -4  -5 300.205 25.0167   1 
   3  -4  -5 340.290 27.4897   4 
  -3   4   5 306.168 26.5707   4 
  -3   4   5 312.557 27.1347   1 
   2  -4  -5 2111.02 85.8646   4 
  -2   4   5 2193.61 87.3259   4 
  -2   4   5 2191.24 86.1635   1 
   1  -4  -5 131.918 14.9234   4 
  -1   4   5 78.6750 12.3006   4 
  -1   4   5 105.948 15.6029   1 
   0  -4  -5 371.115 22.6525   4 
   0   4   5 340.850 28.3926   2 
   0   4   5 362.281 23.2515   4 
  -1  -4  -5 2030.54 85.2189   2 
  -1  -4  -5 2045.64 76.2415   4 
   1   4   5 2058.38 75.8187   4 
   1   4   5 1907.90 85.9319   2 
  -2  -4  -5 1599.64 76.3758   2 
   2   4   5 1686.25 65.4592   4 
   2   4   5 1765.38 80.4306   2 
  -3  -4  -5 1080.47 59.8963   2 
   3   4   5 1142.17 48.3145   4 
   3   4   5 1081.81 63.0673   2 
  -4  -4  -5 893.112 56.4757   2 
   4   4   5 832.472 56.6977   2 
   4   4   5 930.580 44.4565   4 
  -5  -4  -5 10.5595 11.5383   2 
   5   4   5 19.7521 16.1021   1 
   5   4   5 2.92094 17.0912   2 
   6   4   5 229.352 38.4192   2 
   6   4   5 323.130 37.9996   1 
   7   4   5 163.986 37.2701   2 
   7   4   5 144.196 33.5447   1 
   6  -5  -5 15.7390 15.1911   1 
   6  -5  -5 19.5837 12.8998   4 
   5  -5  -5 114.997 21.1451   4 
   5  -5  -5 141.241 23.8383   1 
  -5   5   5 119.604 25.9362   1 
   4  -5  -5 413.383 37.8042   4 
   4  -5  -5 462.978 32.9851   1 
  -4   5   5 404.161 36.6287   1 
   3  -5  -5 -3.6699 10.3322   1 
   3  -5  -5 -2.6216 7.49306   4 
  -3   5   5 13.9265 9.33642   4 
   2  -5  -5 558.791 33.6913   4 
  -2   5   5 533.256 35.0134   1 
  -2   5   5 575.630 34.8705   4 
   1  -5  -5 1125.46 49.1220   4 
  -1   5   5 1084.15 49.5652   4 
  -1   5   5 1056.97 51.4720   2 
  -1   5   5 1081.92 50.8622   1 
   0  -5  -5 39.9493 8.87014   4 
   0   5   5 32.2440 9.44337   4 
   0   5   5 49.4910 15.3904   2 
   0   5   5 40.8527 10.5999   1 
  -1  -5  -5 2264.84 85.2968   4 
   1   5   5 2414.34 86.1955   4 
   1   5   5 2322.62 97.0198   2 
   2   5   5 663.441 46.0548   2 
   2   5   5 715.179 32.6406   4 
   3   5   5 1609.71 80.0314   2 
   3   5   5 1552.66 61.5185   4 
   4   5   5 565.273 45.4430   2 
   4   5   5 530.963 29.9481   4 
   5   5   5 1.21162 9.52965   4 
   5   5   5 27.6724 19.0154   2 
   6   5   5 471.386 44.3184   1 
   6   5   5 402.767 44.5630   2 
   7   5   5 87.1855 24.8228   2 
   7   5   5 115.171 28.6924   1 
   6  -6  -5 29.6466 26.2047   4 
   6  -6  -5 41.7209 18.5591   1 
  -6   6   5 38.1111 29.4361   1 
   5  -6  -5 27.5602 14.8012   1 
   5  -6  -5 3.98125 11.9042   4 
  -5   6   5 3.21131 16.7869   1 
   4  -6  -5 385.112 31.9964   4 
   4  -6  -5 375.407 32.7464   1 
  -4   6   5 393.477 38.0808   1 
   3  -6  -5 30.5376 12.8054   1 
   3  -6  -5 37.7326 13.2685   4 
  -3   6   5 23.0635 14.2756   1 
   2  -6  -5 454.608 30.5785   4 
  -2   6   5 405.150 33.2843   1 
  -2   6   5 446.939 31.3052   4 
   1  -6  -5 367.348 24.4175   4 
  -1   6   5 325.905 24.2034   4 
  -1   6   5 352.327 28.0107   1 
  -1   6   5 316.983 29.7709   2 
   0  -6  -5 22.4256 7.97608   4 
   0   6   5 27.9249 12.8801   2 
   0   6   5 30.8627 10.4856   1 
   0   6   5 22.0194 9.76333   4 
  -1  -6  -5 367.567 21.7800   4 
   1   6   5 387.399 22.3865   4 
   1   6   5 371.622 34.5936   2 
   2   6   5 224.667 32.1828   2 
   2   6   5 200.718 15.7775   4 
   3   6   5 370.176 37.1636   2 
   3   6   5 422.459 23.0953   4 
   4   6   5 162.672 15.4618   4 
   4   6   5 88.9367 23.1482   2 
   5   6   5 56.3195 23.3350   2 
   5   6   5 41.1378 11.6540   4 
   6   6   5 66.2460 23.2870   2 
   6   6   5 50.6423 19.1214   4 
   7   6   5 101.128 29.0405   1 
   7   6   5 94.9021 33.6524   2 
   5  -7  -5 -1.7582 11.2192   4 
   5  -7  -5 10.7371 15.4942   1 
  -5   7   5 -11.595 19.8971   1 
   4  -7  -5 5.01001 11.2255   1 
   4  -7  -5 17.6720 11.0605   4 
  -4   7   5 4.09554 18.8301   1 
   3  -7  -5 355.155 31.4429   1 
   3  -7  -5 401.145 31.3184   4 
  -3   7   5 358.519 34.8091   1 
   2  -7  -5 475.231 31.0020   4 
   2  -7  -5 402.255 39.0845   3 
  -2   7   5 417.766 34.4242   1 
   1  -7  -5 208.073 18.6630   4 
   1  -7  -5 166.149 27.8329   3 
  -1   7   5 144.373 22.0405   1 
  -1   7   5 199.994 20.7471   4 
   0  -7  -5 7.96594 12.1388   3 
   0  -7  -5 11.7905 8.32663   4 
   0   7   5 11.9679 13.9724   2 
   0   7   5 4.37664 7.06090   4 
   0   7   5 16.4731 11.5749   1 
  -1  -7  -5 154.205 20.8701   3 
  -1  -7  -5 179.183 15.0832   4 
   1   7   5 163.911 15.8620   4 
   1   7   5 175.511 21.2138   1 
   1   7   5 236.312 30.4116   2 
   2   7   5 269.259 38.5359   2 
   3   7   5 43.5093 16.9912   2 
   4   7   5 148.102 29.4130   2 
   5   7   5 133.734 32.1393   2 
   6   7   5 7.95307 19.8489   2 
   6   7   5 33.0001 11.1305   4 
   7   7   5 32.3901 23.4056   1 
   7   7   5 -11.917 12.0198   4 
   7   7   5 4.11979 14.1039   4 
   7   7   5 -12.751 27.4055   2 
   5  -8  -5 -17.941 15.3900   1 
   5  -8  -5 10.3041 15.0400   4 
   4  -8  -5 156.264 32.5487   3 
   4  -8  -5 136.375 23.8217   4 
   4  -8  -5 149.388 25.5354   1 
  -4   8   5 129.926 30.2916   1 
   3  -8  -5 140.820 30.3056   3 
   3  -8  -5 112.190 20.9990   1 
   3  -8  -5 137.714 21.9018   4 
  -3   8   5 59.5580 20.9251   1 
   2  -8  -5 604.204 36.1083   4 
   2  -8  -5 509.132 45.5007   3 
  -2   8   5 512.484 41.1439   1 
   1  -8  -5 433.447 39.4048   3 
   1  -8  -5 500.837 31.0477   4 
  -1   8   5 445.908 36.0602   1 
   0  -8  -5 20.5390 14.6621   3 
   0  -8  -5 7.67534 7.74242   4 
   0   8   5 -8.7943 9.51669   1 
  -1  -8  -5 568.476 37.5622   3 
  -1  -8  -5 537.835 35.3143   4 
   1   8   5 639.542 46.7799   2 
   1   8   5 595.250 37.6644   1 
   2   8   5 492.294 43.8850   2 
   2   8   5 431.786 33.3948   1 
   3   8   5 5.10112 17.8220   2 
   4   8   5 221.173 35.8747   2 
   5   8   5 210.263 36.6800   2 
   6   8   5 0.79024 23.0601   2 
   4  -9  -5 112.898 27.6840   1 
   4  -9  -5 166.222 24.9497   4 
   3  -9  -5 219.155 25.2566   4 
   3  -9  -5 166.156 28.3353   1 
   3  -9  -5 241.134 38.1509   3 
  -3   9   5 197.549 33.3025   1 
   2  -9  -5 90.9995 22.0361   3 
   2  -9  -5 57.5401 14.4113   4 
  -2   9   5 29.7774 18.2154   1 
   1  -9  -5 389.810 27.4120   4 
   1  -9  -5 369.535 39.8907   3 
  -1   9   5 361.719 36.1551   1 
   0  -9  -5 73.6096 19.0400   3 
   0  -9  -5 112.801 14.9621   4 
   0   9   5 89.8241 20.3844   1 
   1   9   5 7.68066 12.5147   1 
   2   9   5 867.241 50.5649   1 
   2   9   5 958.042 62.8653   2 
   3   9   5 33.3933 19.8451   2 
   3   9   5 -0.4791 13.1819   1 
   4   9   5 239.473 41.0540   2 
   5   9   5 216.319 42.9257   2 
   6   9   5 -28.552 24.8182   2 
   3 -10  -5 12.9771 13.7233   4 
  -3  10   5 30.6245 30.3384   2 
   2 -10  -5 8.63246 19.3783   3 
   2 -10  -5 -6.4873 11.3789   4 
  -2  10   5 -6.0154 19.3534   1 
   1 -10  -5 191.579 32.4513   3 
   1 -10  -5 268.108 22.4632   4 
  -1  10   5 206.329 30.5223   1 
   0 -10  -5 106.296 22.8362   3 
   0  10   5 69.9746 18.8449   1 
  -1 -10  -5 -3.7939 12.4025   3 
   1  10   5 -0.3749 10.8814   1 
   2  10   5 257.377 41.4978   2 
   2  10   5 165.282 24.1633   1 
   3  10   5 7.59974 15.3477   1 
   3  10   5 -14.911 24.3119   2 
   4  10   5 25.9986 29.3312   2 
   4  10   5 28.3576 24.9658   1 
   5  10   5 184.444 40.1727   2 
   2 -11  -5 8.24769 13.6510   4 
   1 -11  -5 4.50254 26.0005   3 
   1 -11  -5 -6.6269 12.3046   4 
   0  11   5 9.27912 23.2337   1 
  -1 -11  -5 64.6491 18.7175   3 
   1  11   5 36.6096 19.4618   1 
  -2 -11  -5 -5.6464 16.7845   3 
   2  11   5 5.52183 19.3772   1 
   3  11   5 -40.148 33.5573   2 
   3  11   5 5.14675 17.1390   1 
   4  11   5 -16.668 25.4877   2 
   3   6  -6 22.4875 19.9778   3 
  -3  -6   6 -13.993 13.3565   4 
   2   6  -6 12.6590 22.3999   3 
  -2  -6   6 84.1721 17.9457   4 
   1   6  -6 28.2685 33.9167   3 
  -1  -6   6 22.1662 14.1944   4 
   0   6  -6 22.5947 32.0027   3 
   0  -6   6 6.51899 13.0791   4 
  -1   6  -6 126.987 36.0015   3 
   1  -6   6 163.007 24.9382   4 
   4   5  -6 77.9424 41.2470   3 
   4   5  -6 161.292 34.5086   2 
  -4  -5   6 101.040 20.9553   4 
   3   5  -6 1.95119 17.3427   3 
   3   5  -6 38.2799 28.8096   2 
  -3  -5   6 11.0829 16.3364   3 
  -3  -5   6 22.7364 13.7016   4 
   2   5  -6 423.530 44.2805   3 
   2   5  -6 533.385 66.8812   2 
  -2  -5   6 391.503 29.9651   4 
  -2  -5   6 396.419 43.1115   3 
   1   5  -6 230.042 42.6508   2 
   1   5  -6 149.038 29.3377   3 
  -1  -5   6 124.813 26.9521   3 
  -1  -5   6 141.056 21.6837   4 
   0   5  -6 25.0478 21.6239   3 
   0   5  -6 20.4476 25.1923   2 
   0  -5   6 31.2927 18.0377   3 
   0  -5   6 20.5122 11.3349   4 
  -1   5  -6 14.2380 25.0144   2 
  -1   5  -6 102.838 29.9708   3 
   1  -5   6 44.5314 23.7008   3 
   1  -5   6 113.125 19.9207   4 
  -2   5  -6 -7.8633 25.8451   3 
   2  -5   6 10.5636 19.5192   3 
   2  -5   6 5.67954 13.9165   4 
  -3   5  -6 -10.615 24.6826   3 
   3  -5   6 20.6918 21.2377   1 
   5   4  -6 83.5257 29.5169   2 
   5   4  -6 116.540 17.7791   4 
   5   4  -6 123.504 30.3488   3 
  -5  -4   6 140.296 24.3551   4 
   4   4  -6 198.548 37.7261   2 
   4   4  -6 158.512 30.9435   3 
   4   4  -6 161.820 21.3244   4 
  -4  -4   6 164.559 22.4198   4 
   3   4  -6 -11.945 20.6735   2 
   3   4  -6 4.22511 14.6902   3 
  -3  -4   6 28.2320 10.3062   4 
   2   4  -6 291.600 33.8088   3 
   2   4  -6 368.722 42.8963   2 
  -2  -4   6 300.108 26.6768   4 
  -2  -4   6 331.419 38.8539   3 
   1   4  -6 160.919 29.4694   3 
   1   4  -6 205.507 37.4987   2 
  -1  -4   6 213.874 32.8649   3 
  -1  -4   6 214.729 24.8062   4 
   0   4  -6 54.9068 22.0249   3 
   0   4  -6 69.6972 27.3757   2 
   0  -4   6 61.6135 20.9034   3 
   0  -4   6 75.0408 17.5963   4 
  -1   4  -6 475.812 45.4016   3 
  -1   4  -6 529.712 51.0803   2 
   1  -4   6 564.804 46.4237   3 
   1  -4   6 463.904 34.8418   4 
  -2   4  -6 113.959 27.5421   3 
  -2   4  -6 96.4649 32.8298   2 
   2  -4   6 38.2202 18.6929   3 
   2  -4   6 52.2301 17.0122   4 
  -3   4  -6 113.077 38.3237   2 
  -3   4  -6 75.1000 30.3837   3 
   3  -4   6 145.628 52.3946   3 
   3  -4   6 71.5810 21.1306   1 
   3  -4   6 86.5085 23.3988   4 
   4  -4   6 421.149 47.1279   3 
   4  -4   6 377.766 44.0938   1 
   6   3  -6 27.7228 11.5389   4 
  -6  -3   6 22.6095 16.0343   4 
   5   3  -6 98.5707 27.2818   3 
   5   3  -6 118.095 19.1239   4 
  -5  -3   6 149.951 22.7122   4 
   4   3  -6 53.4428 22.4061   3 
   4   3  -6 29.3314 11.7240   4 
   4   3  -6 48.5224 21.7208   2 
  -4  -3   6 41.9938 13.6611   4 
   3   3  -6 59.4036 21.3479   2 
   3   3  -6 44.4072 12.0830   4 
   3   3  -6 54.7030 18.7630   3 
  -3  -3   6 64.4430 15.6199   4 
   2   3  -6 102.686 21.3573   3 
   2   3  -6 134.398 28.6396   2 
  -2  -3   6 134.253 20.5919   4 
  -2  -3   6 151.852 27.2183   3 
   1   3  -6 127.068 24.1200   3 
   1   3  -6 129.320 29.8952   2 
  -1  -3   6 159.973 29.5252   3 
  -1  -3   6 136.714 20.8745   4 
   0   3  -6 462.097 46.0251   2 
   0   3  -6 414.907 52.0360   3 
   0  -3   6 433.113 38.9244   3 
   0  -3   6 444.444 30.5312   4 
  -1   3  -6 8.52718 15.3005   2 
  -1   3  -6 -10.850 16.7179   3 
   1  -3   6 15.0931 11.3795   4 
   1  -3   6 -0.3315 12.5571   3 
  -2   3  -6 64.3633 22.5001   2 
  -2   3  -6 22.7911 18.1110   3 
   2  -3   6 62.6414 17.7444   3 
   2  -3   6 26.6551 11.5018   4 
   2  -3   6 35.1933 18.3108   1 
  -3   3  -6 111.809 27.3133   3 
   3  -3   6 63.0691 21.0520   1 
   3  -3   6 114.402 24.3429   3 
   3  -3   6 137.282 23.3506   4 
  -4   3  -6 287.414 52.4008   2 
   4  -3   6 476.511 44.8604   1 
   4  -3   6 373.323 34.6497   4 
   4  -3   6 397.971 40.8231   3 
   5  -3   6 -37.315 25.6985   3 
   5  -3   6 13.3363 26.1717   1 
   6   2  -6 214.350 23.7569   4 
   6   2  -6 198.442 36.8829   3 
  -6  -2   6 284.021 34.3128   4 
   5   2  -6 23.9535 15.4043   3 
   5   2  -6 5.84281 8.56909   4 
  -5  -2   6 3.61041 11.4938   4 
   4   2  -6 109.053 22.5790   2 
   4   2  -6 82.4517 14.9605   4 
   4   2  -6 92.1566 22.2957   3 
  -4  -2   6 87.2166 17.1799   4 
   3   2  -6 89.0064 22.2456   3 
   3   2  -6 112.269 17.2278   4 
   3   2  -6 118.978 25.8065   2 
  -3  -2   6 105.513 19.6590   4 
   2   2  -6 21.0220 14.0873   3 
   2   2  -6 35.4841 15.2298   2 
   2   2  -6 3.26220 9.19846   4 
  -2  -2   6 33.4523 12.0314   4 
  -2  -2   6 0.18798 10.8719   3 
   1   2  -6 192.198 33.5765   2 
   1   2  -6 167.046 27.6120   3 
  -1  -2   6 156.818 25.7039   3 
  -1  -2   6 188.520 23.5475   4 
   0   2  -6 129.253 28.2495   2 
   0   2  -6 118.185 22.5448   3 
   0  -2   6 116.501 23.5649   3 
   0  -2   6 128.480 19.2169   4 
  -1   2  -6 226.269 39.3649   2 
  -1   2  -6 224.780 32.4200   3 
   1  -2   6 188.277 22.7866   4 
   1  -2   6 247.785 28.7262   3 
  -2   2  -6 154.374 32.7296   2 
  -2   2  -6 163.753 27.9866   3 
   2  -2   6 206.415 27.6981   1 
   2  -2   6 156.664 23.2388   4 
   2  -2   6 154.031 24.5877   3 
   2  -2   6 165.515 33.7875   2 
  -3   2  -6 28.7428 20.1447   2 
  -3   2  -6 23.2938 18.1192   3 
   3  -2   6 17.0385 19.0295   2 
   3  -2   6 5.87234 15.3888   3 
   3  -2   6 48.3136 14.0742   4 
  -4   2  -6 -1.4995 22.9719   2 
   4  -2   6 -6.2540 16.8314   1 
   4  -2   6 -25.489 12.7555   3 
   4  -2   6 -13.128 18.0762   2 
  -5   2  -6 42.1165 21.6681   2 
   5  -2   6 5.83995 20.9619   2 
   5  -2   6 12.1670 18.9535   1 
   5  -2   6 -32.306 16.2167   3 
   7   1  -6 20.9806 13.4388   4 
   7   1  -6 37.6556 22.4636   3 
   6   1  -6 592.367 52.0826   3 
   6   1  -6 559.962 39.9061   4 
  -6  -1   6 697.994 47.0380   4 
   5   1  -6 173.202 30.3342   3 
   5   1  -6 164.559 22.5347   4 
  -5  -1   6 234.960 30.2795   4 
   4   1  -6 830.165 44.7726   4 
   4   1  -6 885.399 56.4006   3 
  -4  -1   6 758.113 46.2687   4 
   3   1  -6 266.488 30.6533   3 
   3   1  -6 263.496 22.8935   4 
  -3  -1   6 268.238 24.4178   4 
   2   1  -6 176.895 20.0086   4 
   2   1  -6 231.650 26.8215   3 
   2   1  -6 219.737 28.6064   2 
  -2  -1   6 228.236 22.3886   4 
   1   1  -6 557.520 42.5856   2 
   1   1  -6 571.101 34.3317   4 
   1   1  -6 545.888 39.3070   3 
  -1  -1   6 567.133 41.7420   3 
  -1  -1   6 565.257 33.1269   4 
   0   1  -6 331.652 36.1420   2 
   0   1  -6 433.795 33.1027   3 
   0  -1   6 374.508 40.5156   2 
   0  -1   6 317.779 26.1665   4 
   0  -1   6 433.658 34.3029   3 
  -1   1  -6 351.842 31.8145   3 
  -1   1  -6 289.826 34.7182   2 
   1  -1   6 301.272 28.8587   3 
   1  -1   6 301.658 25.4465   4 
   1  -1   6 292.648 37.5223   2 
  -2   1  -6 22.9516 15.1755   3 
  -2   1  -6 46.1929 19.1265   2 
   2  -1   6 4.33074 13.0446   1 
   2  -1   6 32.6450 13.4606   3 
   2  -1   6 53.8096 12.7826   4 
   2  -1   6 40.8410 23.2957   2 
  -3   1  -6 95.7251 25.9823   2 
  -3   1  -6 82.5351 21.2721   3 
   3  -1   6 101.169 20.6278   3 
   3  -1   6 116.208 20.1758   4 
   3  -1   6 61.9917 22.8439   2 
   3  -1   6 116.500 21.9728   1 
  -4   1  -6 103.662 25.4691   2 
   4  -1   6 102.408 26.9350   1 
   4  -1   6 123.436 29.7905   2 
  -5   1  -6 208.054 40.1971   2 
   5  -1   6 176.752 34.7959   2 
   5  -1   6 132.828 27.8396   1 
   6  -1   6 89.7138 36.6779   2 
   6  -1   6 65.4749 25.1970   1 
   7   0  -6 201.359 38.3972   3 
   7   0  -6 82.1299 19.1849   4 
   6   0  -6 513.851 38.5850   4 
   6   0  -6 699.145 54.0518   3 
   5   0  -6 200.816 32.1744   3 
   5   0  -6 203.400 22.2706   4 
  -5   0   6 211.568 30.0242   4 
   4   0  -6 79.2497 23.0620   3 
   4   0  -6 105.128 19.5561   4 
  -4   0   6 85.4626 17.9567   4 
   3   0  -6 262.376 29.9386   3 
   3   0  -6 241.652 22.6074   4 
  -3   0   6 251.614 28.4276   4 
   2   0  -6 130.265 23.1074   2 
   2   0  -6 110.636 21.9658   3 
   2   0  -6 125.814 18.8904   4 
  -2   0   6 95.9373 16.0359   4 
   1   0  -6 1483.01 67.7016   3 
   1   0  -6 1427.92 69.4533   2 
   1   0  -6 1275.24 60.0201   4 
  -1   0   6 1507.68 72.9644   2 
  -1   0   6 1331.90 60.5259   4 
   0   0  -6 474.892 38.6539   2 
   0   0  -6 488.696 33.7561   3 
   0   0   6 478.793 34.4016   3 
   0   0   6 471.229 40.0180   2 
   0   0   6 444.995 29.4593   4 
  -1   0  -6 608.502 45.5428   2 
  -1   0  -6 624.166 37.3990   3 
   1   0   6 661.954 49.6080   2 
   1   0   6 546.365 33.9239   4 
   1   0   6 601.225 37.0788   3 
  -2   0  -6 1193.44 70.3080   2 
  -2   0  -6 1210.50 58.8864   3 
   2   0   6 1224.57 57.6466   3 
   2   0   6 1287.27 73.9415   2 
   2   0   6 1322.72 63.6122   1 
   2   0   6 1082.93 55.9541   4 
  -3   0  -6 244.581 36.8577   2 
  -3   0  -6 221.812 28.2669   3 
   3   0   6 208.417 25.0121   4 
   3   0   6 187.335 28.6460   1 
   3   0   6 224.566 37.3440   2 
   3   0   6 217.328 23.6331   3 
  -4   0  -6 1270.94 78.8036   2 
   4   0   6 1271.55 82.2042   2 
   4   0   6 1447.55 74.5394   1 
  -5   0  -6 658.343 55.1058   2 
   5   0   6 629.001 57.5235   2 
   5   0   6 631.725 52.0172   1 
  -6   0  -6 143.797 35.4619   2 
   6   0   6 106.796 27.9905   1 
   6   0   6 129.043 34.6155   2 
   7  -1  -6 75.4006 20.6820   4 
   6  -1  -6 100.346 26.3073   3 
   6  -1  -6 112.808 20.7422   4 
   5  -1  -6 51.8892 17.3012   3 
   5  -1  -6 28.4473 11.1684   4 
  -5   1   6 49.5014 14.6137   4 
   4  -1  -6 38.8515 11.9545   4 
   4  -1  -6 19.2380 16.0679   3 
  -4   1   6 23.2453 11.5692   4 
   3  -1  -6 1125.01 54.1633   4 
   3  -1  -6 1175.28 62.3399   3 
  -3   1   6 1072.55 63.2567   4 
   2  -1  -6 133.818 18.4680   4 
   2  -1  -6 107.079 19.8055   3 
  -2   1   6 155.192 20.7235   4 
   1  -1  -6 1646.24 71.3847   3 
   1  -1  -6 1474.50 64.8056   4 
   1  -1  -6 1534.06 70.2580   2 
  -1   1   6 1568.41 73.6786   2 
  -1   1   6 1483.96 64.6866   4 
   0  -1  -6 168.899 21.0247   3 
   0  -1  -6 158.643 18.9944   4 
   0  -1  -6 164.262 25.0162   2 
   0   1   6 121.816 16.5365   4 
   0   1   6 192.054 29.2856   2 
  -1  -1  -6 397.487 34.5429   2 
  -1  -1  -6 409.775 27.3410   3 
   1   1   6 356.626 27.3203   3 
   1   1   6 352.457 25.2905   4 
   1   1   6 382.687 37.5428   2 
  -2  -1  -6 1239.05 67.2530   2 
   2   1   6 1082.82 53.9790   4 
   2   1   6 1264.48 61.5069   1 
   2   1   6 1150.63 67.4671   2 
  -3  -1  -6 99.4541 25.0592   2 
   3   1   6 93.0997 17.1304   4 
   3   1   6 135.629 29.9170   2 
   3   1   6 120.592 24.3608   1 
  -4  -1  -6 539.428 47.6944   2 
   4   1   6 419.651 67.4168   2 
  -5  -1  -6 308.251 39.8975   2 
   5   1   6 365.750 40.0617   1 
   5   1   6 335.189 48.1848   2 
  -6  -1  -6 31.9439 19.0185   2 
   6   1   6 36.4210 19.3283   1 
   6   1   6 24.2198 25.6025   2 
   7  -2  -6 -19.829 11.6458   4 
   7  -2  -6 -2.7151 20.1448   3 
   6  -2  -6 1.73289 14.9901   3 
   6  -2  -6 24.0091 14.6327   4 
   5  -2  -6 7.94829 11.0079   4 
  -5   2   6 0.89731 13.0049   4 
   4  -2  -6 79.3252 16.4273   4 
  -4   2   6 83.7663 19.7239   4 
   3  -2  -6 63.6846 13.8849   4 
   3  -2  -6 79.4971 18.3767   3 
  -3   2   6 84.4387 15.4736   4 
   2  -2  -6 117.632 16.6805   4 
   2  -2  -6 88.8952 19.3188   3 
  -2   2   6 83.4923 15.3930   4 
   1  -2  -6 385.893 29.2183   2 
   1  -2  -6 454.538 32.9483   3 
   1  -2  -6 427.324 27.9618   4 
  -1   2   6 456.975 32.9214   2 
  -1   2   6 399.547 27.3288   4 
   0  -2  -6 285.758 22.1824   4 
   0  -2  -6 263.837 27.4565   2 
   0  -2  -6 290.991 24.2500   3 
   0   2   6 272.330 21.2971   4 
   0   2   6 276.640 28.0528   2 
  -1  -2  -6 14.0034 13.6505   2 
  -1  -2  -6 36.9783 10.5990   3 
   1   2   6 28.9450 17.6636   2 
   1   2   6 22.1674 8.31763   4 
  -2  -2  -6 14.0654 11.0810   2 
   2   2   6 1.30595 11.9692   2 
   2   2   6 8.51786 8.01912   4 
  -3  -2  -6 61.6573 18.5274   2 
   3   2   6 52.2010 18.3216   1 
   3   2   6 51.3722 19.4756   2 
  -4  -2  -6 84.7647 23.8345   2 
   4   2   6 99.9595 18.2495   4 
   4   2   6 59.7134 20.5871   1 
   4   2   6 70.2981 23.8097   2 
  -5  -2  -6 245.244 38.8744   2 
   5   2   6 238.382 39.6920   2 
   5   2   6 242.000 37.5915   1 
  -6  -2  -6 12.3164 16.3583   2 
   6   2   6 -9.3581 15.8613   1 
   6   2   6 7.71238 17.1828   2 
  -7  -2  -6 32.2587 35.9672   2 
   7   2   6 15.4283 25.2787   2 
   7   2   6 13.5866 20.8996   1 
   7  -3  -6 29.5396 15.3704   4 
   6  -3  -6 167.744 26.9604   4 
   5  -3  -6 89.9574 18.6433   4 
  -5   3   6 123.270 20.9072   4 
   4  -3  -6 33.4361 13.4075   4 
  -4   3   6 43.1216 13.4694   4 
   3  -3  -6 1264.44 59.7488   4 
  -3   3   6 1259.85 61.7549   4 
   2  -3  -6 94.2100 16.2237   4 
  -2   3   6 72.3247 14.1807   4 
  -2   3   6 92.4698 15.0718   1 
   1  -3  -6 767.849 40.3380   4 
   1  -3  -6 835.819 41.8241   2 
  -1   3   6 849.833 38.9493   1 
  -1   3   6 748.799 40.7220   4 
  -1   3   6 852.779 45.3063   2 
   0  -3  -6 1126.46 55.2831   2 
   0  -3  -6 1063.23 49.9283   4 
   0  -3  -6 1140.16 52.5198   3 
   0   3   6 1162.05 59.1895   2 
   0   3   6 1145.68 50.2079   4 
  -1  -3  -6 118.107 20.8282   2 
  -1  -3  -6 112.261 16.3021   4 
   1   3   6 146.363 25.4529   2 
   1   3   6 111.624 15.0202   4 
  -2  -3  -6 20.3533 15.4053   2 
   2   3   6 44.9703 18.8817   2 
   2   3   6 34.0286 9.75978   4 
  -3  -3  -6 39.2236 16.0542   2 
   3   3   6 36.8025 11.3909   4 
   3   3   6 32.2892 19.6288   2 
  -4  -3  -6 62.6920 22.4398   2 
   4   3   6 47.3178 13.7194   1 
   4   3   6 25.8239 16.3482   2 
   4   3   6 27.7785 10.8973   4 
  -5  -3  -6 -12.551 15.2917   2 
   5   3   6 17.9932 17.9278   1 
   5   3   6 8.00193 17.4569   2 
  -6  -3  -6 1.28737 19.1102   2 
   6   3   6 24.3606 18.9897   2 
   6   3   6 54.9273 22.2528   1 
  -7  -3  -6 -41.851 22.0323   2 
   7   3   6 -14.594 19.6019   2 
   7   3   6 -11.162 20.5540   1 
   6  -4  -6 308.405 31.6366   1 
   6  -4  -6 294.202 33.4187   4 
   5  -4  -6 434.945 36.5862   4 
  -5   4   6 484.677 40.7085   1 
   4  -4  -6 6.70934 10.4769   1 
   4  -4  -6 -9.7119 5.57662   4 
  -4   4   6 18.4913 11.3094   4 
   3  -4  -6 1422.12 65.4564   4 
  -3   4   6 1464.04 65.3732   1 
  -3   4   6 1318.87 66.1212   4 
   2  -4  -6 10.6228 8.53740   4 
  -2   4   6 -4.6234 8.83816   1 
  -2   4   6 13.2769 10.3482   4 
   1  -4  -6 130.302 17.0854   4 
  -1   4   6 177.915 23.4941   2 
  -1   4   6 155.772 19.8822   1 
  -1   4   6 160.556 17.6997   4 
   0  -4  -6 304.490 27.2013   2 
   0  -4  -6 354.871 24.2515   4 
   0   4   6 328.218 23.0548   4 
   0   4   6 369.644 31.5917   2 
  -1  -4  -6 268.784 21.1839   4 
  -1  -4  -6 251.204 26.6562   2 
   1   4   6 231.708 29.1057   2 
   1   4   6 233.291 18.8772   4 
  -2  -4  -6 1312.51 68.7557   2 
   2   4   6 1365.57 71.4202   2 
   2   4   6 1378.81 57.5077   4 
  -3  -4  -6 927.786 56.8443   2 
   3   4   6 809.002 54.7432   2 
   3   4   6 894.311 43.0779   4 
  -4  -4  -6 35.7553 18.2498   2 
   4   4   6 60.6665 21.7815   2 
   4   4   6 15.5497 10.0331   4 
  -5  -4  -6 603.297 49.6377   2 
   5   4   6 637.760 38.7662   4 
   5   4   6 622.812 52.3641   2 
   5   4   6 652.886 49.9931   1 
  -6  -4  -6 550.768 48.6781   2 
   6   4   6 512.635 52.1697   2 
   6   4   6 452.327 46.3747   1 
   7   4   6 84.2786 31.2185   2 
   6  -5  -6 74.3336 18.5317   4 
   6  -5  -6 47.1367 18.3640   1 
  -6   5   6 56.3551 47.5791   1 
   5  -5  -6 414.193 35.9796   4 
   5  -5  -6 447.949 34.6871   1 
  -5   5   6 409.011 42.0766   1 
   4  -5  -6 52.7159 14.9099   1 
   4  -5  -6 62.6245 15.1682   4 
  -4   5   6 75.8549 18.2839   4 
  -4   5   6 90.3064 19.8723   1 
   3  -5  -6 454.597 33.3643   4 
  -3   5   6 424.917 32.9234   4 
  -3   5   6 463.254 35.3504   1 
   2  -5  -6 443.091 30.6996   4 
  -2   5   6 439.396 31.9817   4 
  -2   5   6 473.172 32.0038   1 
   1  -5  -6 38.2575 10.2416   4 
  -1   5   6 32.4303 13.4024   1 
  -1   5   6 24.9373 9.81158   4 
  -1   5   6 52.7953 15.2680   2 
   0  -5  -6 1481.03 61.7979   4 
   0   5   6 1438.81 63.5076   1 
   0   5   6 1490.20 62.6351   4 
   0   5   6 1556.11 71.3146   2 
  -1  -5  -6 526.689 30.0628   4 
   1   5   6 524.244 29.0383   4 
   1   5   6 571.739 40.5729   2 
   2   5   6 1677.82 83.8795   2 
   2   5   6 1720.10 67.7317   4 
  -3  -5  -6 414.963 34.7769   2 
   3   5   6 454.846 40.7556   2 
   3   5   6 403.070 25.8650   4 
   4   5   6 -4.2839 8.36777   4 
   4   5   6 32.4955 19.8005   2 
   5   5   6 1056.51 51.6920   4 
   5   5   6 1142.93 72.4342   2 
   6   5   6 277.653 27.1021   4 
   6   5   6 362.364 41.7157   1 
   6   5   6 227.350 41.2750   2 
   7   5   6 86.6756 31.6835   2 
   6  -6  -6 7.70097 14.8586   4 
   6  -6  -6 22.5006 16.7615   1 
  -6   6   6 -82.505 27.5861   1 
   5  -6  -6 90.3714 18.1364   4 
   5  -6  -6 117.425 22.0144   1 
  -5   6   6 103.352 27.1286   1 
   4  -6  -6 51.7646 17.1727   4 
   4  -6  -6 30.1731 15.5679   1 
  -4   6   6 29.4136 16.9768   1 
   3  -6  -6 9.11479 8.02873   4 
  -3   6   6 14.3159 12.1622   4 
  -3   6   6 7.01070 9.38589   1 
   2  -6  -6 -1.1717 7.02134   4 
  -2   6   6 6.14571 16.7715   4 
  -2   6   6 22.2647 11.5788   1 
   1  -6  -6 29.3575 10.1744   4 
  -1   6   6 52.2174 22.9042   1 
  -1   6   6 51.6322 17.4788   2 
  -1   6   6 44.4452 11.7054   4 
   0  -6  -6 251.688 20.5565   4 
   0   6   6 260.218 24.6906   1 
   0   6   6 256.169 21.0887   4 
   0   6   6 265.608 28.3731   2 
  -1  -6  -6 156.836 16.6594   4 
   1   6   6 132.763 25.4873   2 
   1   6   6 155.386 16.3527   4 
   2   6   6 588.810 30.0872   4 
   2   6   6 568.736 45.7438   2 
   3   6   6 54.2150 11.1659   4 
   3   6   6 44.2536 19.3861   2 
   4   6   6 64.7986 23.6751   2 
   4   6   6 119.006 14.8562   4 
   5   6   6 101.090 14.7473   4 
   5   6   6 85.5382 23.3914   2 
   6   6   6 146.239 20.8540   4 
   6   6   6 89.8094 30.0697   2 
   7   6   6 -44.442 25.3676   2 
   7   6   6 -41.962 12.6653   4 
   5  -7  -6 9.17221 13.1003   4 
   5  -7  -6 12.8054 15.3900   1 
  -5   7   6 7.14950 21.5898   1 
   4  -7  -6 160.980 25.4899   1 
   4  -7  -6 231.726 24.9495   4 
  -4   7   6 145.637 26.8348   1 
   3  -7  -6 421.277 32.9772   4 
  -3   7   6 367.132 34.7779   1 
   2  -7  -6 118.981 19.0050   4 
  -2   7   6 138.485 20.4450   4 
  -2   7   6 111.933 22.1791   1 
   1  -7  -6 77.5550 14.3550   4 
  -1   7   6 51.5623 12.5507   4 
  -1   7   6 81.4358 20.1184   2 
  -1   7   6 46.3413 15.0411   1 
   0  -7  -6 52.9514 11.2109   4 
   0  -7  -6 54.0897 17.1821   3 
   0   7   6 51.7600 11.2223   4 
   0   7   6 38.9900 13.4862   1 
   0   7   6 79.5215 21.1797   2 
  -1  -7  -6 119.038 15.1272   4 
   1   7   6 142.967 16.2161   4 
   1   7   6 130.288 19.9110   1 
   1   7   6 182.704 29.7954   2 
   2   7   6 -1.5568 7.32237   4 
   2   7   6 15.7331 17.1775   2 
   3   7   6 213.082 17.8649   4 
   3   7   6 284.664 58.6646   2 
   4   7   6 167.968 33.7350   2 
   4   7   6 166.007 16.3298   4 
   5   7   6 9.17797 9.60257   4 
   5   7   6 10.4776 17.7033   2 
   6   7   6 1.67031 10.5499   4 
   6   7   6 -17.083 20.0692   2 
   7   7   6 -24.157 22.2048   2 
   7   7   6 -4.7680 14.8792   4 
   5  -8  -6 173.054 29.4488   1 
   5  -8  -6 230.996 43.0993   4 
   4  -8  -6 172.250 26.2989   4 
   4  -8  -6 221.167 41.2066   3 
   4  -8  -6 183.559 28.0764   1 
  -4   8   6 139.081 28.6445   1 
   3  -8  -6 222.232 25.4653   4 
   3  -8  -6 203.279 33.3464   3 
  -3   8   6 237.697 34.7912   1 
   2  -8  -6 167.941 29.2872   3 
   2  -8  -6 130.747 18.2829   4 
  -2   8   6 163.580 28.2880   2 
  -2   8   6 100.224 19.6267   1 
   1  -8  -6 34.8003 14.3640   3 
   1  -8  -6 49.4673 11.2873   4 
  -1   8   6 38.4468 13.4126   1 
  -1   8   6 15.0523 16.9770   2 
   0  -8  -6 175.951 18.4656   4 
   0  -8  -6 154.601 23.9297   3 
   0   8   6 198.726 19.5528   4 
   0   8   6 140.578 23.8923   1 
   0   8   6 165.083 27.8863   2 
  -1  -8  -6 399.106 24.5088   4 
   1   8   6 414.224 40.1455   2 
   1   8   6 387.236 25.4055   4 
   1   8   6 377.605 32.2744   1 
   2   8   6 85.7706 12.9848   4 
   2   8   6 106.162 25.9064   1 
   3   8   6 370.349 40.3457   2 
   4   8   6 76.3801 26.1525   2 
   5   8   6 130.010 36.2514   2 
   6   8   6 131.833 36.1628   2 
   4  -9  -6 53.1849 22.6140   1 
   4  -9  -6 59.9726 17.3931   4 
   3  -9  -6 -2.6539 20.4533   3 
   3  -9  -6 6.54339 10.9684   4 
  -3   9   6 13.1268 18.7580   1 
   2  -9  -6 483.898 34.5878   4 
   2  -9  -6 530.766 49.2662   3 
   1  -9  -6 94.4508 16.2719   4 
   1  -9  -6 103.587 24.7423   3 
  -1   9   6 94.0767 22.1126   1 
  -1   9   6 106.021 25.5775   2 
   0  -9  -6 70.6321 13.0509   4 
   0  -9  -6 80.9678 19.2831   3 
   0   9   6 174.512 28.7817   2 
   0   9   6 72.1095 18.7233   1 
  -1  -9  -6 749.691 36.2119   4 
   1   9   6 855.930 58.5012   2 
   1   9   6 785.624 48.2485   1 
   2   9   6 15.5718 21.4009   2 
   2   9   6 18.8265 12.9580   1 
   3   9   6 479.679 35.5653   1 
   3   9   6 428.420 45.5132   2 
   4   9   6 173.773 36.9955   2 
   5   9   6 102.351 30.1763   2 
   6   9   6 89.2266 37.3197   2 
   3 -10  -6 -7.8416 12.8991   4 
   2 -10  -6 9.57162 12.9921   4 
   2 -10  -6 112.673 28.0787   3 
   1 -10  -6 -46.069 16.0380   3 
   1 -10  -6 26.2672 10.3328   4 
  -1  10   6 -20.851 16.4683   1 
   0 -10  -6 -18.636 16.1507   3 
   0 -10  -6 29.2257 9.73483   4 
   0  10   6 64.1009 25.6546   2 
  -1 -10  -6 141.514 22.8219   3 
   1  10   6 268.734 43.3449   2 
   1  10   6 167.663 28.6774   1 
   2  10   6 8.87708 14.9019   1 
   2  10   6 8.13033 19.8003   2 
   3  10   6 54.3532 25.5960   2 
   4  10   6 208.434 39.2116   2 
   4  10   6 240.064 30.8571   1 
   5  10   6 21.6215 24.4089   2 
   2 -11  -6 -6.9969 12.7327   4 
   1 -11  -6 63.2386 15.2051   4 
   1 -11  -6 0.03636 23.2263   3 
   0 -11  -6 29.5470 21.6351   3 
  -1 -11  -6 -15.228 13.6877   3 
   1  11   6 13.5112 19.8188   1 
   1  11   6 88.4303 33.0021   2 
   2  11   6 103.246 35.2831   2 
   2  11   6 45.7009 23.1389   1 
   3  11   6 -50.943 30.2876   2 
   3  11   6 -18.129 18.3475   1 
   4  11   6 -8.7111 21.5398   2 
   3   5  -7 80.7654 32.3679   2 
   3   5  -7 64.6976 28.0185   3 
  -3  -5   7 110.421 20.6976   4 
   2   5  -7 7.02400 21.0175   3 
   2   5  -7 30.6516 34.4445   2 
  -2  -5   7 40.5108 15.9711   4 
  -1  -5   7 51.6656 16.8066   4 
   0   5  -7 242.361 63.7099   3 
   0  -5   7 218.827 31.0766   4 
  -1   5  -7 29.3681 34.6587   3 
   1  -5   7 53.2642 17.7087   4 
   4   4  -7 21.6780 25.4517   2 
   4   4  -7 14.1005 21.9542   3 
  -4  -4   7 32.7037 15.5199   4 
   3   4  -7 157.973 33.9547   3 
   3   4  -7 191.448 33.4547   2 
  -3  -4   7 172.416 24.5721   4 
   2   4  -7 128.972 29.9830   3 
   2   4  -7 99.3366 34.6097   2 
  -2  -4   7 187.177 35.6452   3 
  -2  -4   7 156.512 23.0877   4 
   1   4  -7 94.5147 24.1166   3 
  -1  -4   7 166.359 34.8383   3 
  -1  -4   7 112.870 20.1422   4 
   0   4  -7 386.849 56.6901   2 
   0   4  -7 438.497 47.7883   3 
   0  -4   7 562.685 48.7908   3 
   0  -4   7 451.596 35.3808   4 
  -1   4  -7 79.7638 31.6677   2 
  -1   4  -7 52.2091 24.2388   3 
   1  -4   7 55.3866 25.0753   3 
   1  -4   7 32.5181 16.8219   4 
  -2   4  -7 224.465 40.2078   3 
   2  -4   7 270.601 35.3827   4 
   2  -4   7 244.206 39.8886   3 
  -3   4  -7 311.099 46.7643   3 
   5   3  -7 31.3689 13.8540   4 
   5   3  -7 -6.1474 20.5839   3 
  -5  -3   7 66.0504 20.7270   4 
   4   3  -7 27.1333 18.0957   3 
   4   3  -7 -30.721 19.7357   2 
   4   3  -7 -17.064 10.5855   4 
  -4  -3   7 -5.0188 12.0736   4 
   3   3  -7 366.886 48.5313   2 
   3   3  -7 360.743 29.9258   4 
   3   3  -7 311.057 38.5214   3 
  -3  -3   7 309.603 29.9537   4 
   2   3  -7 281.654 37.4046   3 
   2   3  -7 224.208 42.3805   2 
  -2  -3   7 247.121 30.1813   4 
  -2  -3   7 244.071 39.0039   3 
   1   3  -7 462.210 45.8737   2 
   1   3  -7 333.670 38.9677   3 
  -1  -3   7 429.016 31.9536   4 
  -1  -3   7 418.681 41.6809   3 
   0   3  -7 57.5389 21.3076   3 
   0   3  -7 73.3984 25.3008   2 
   0  -3   7 35.8047 17.1509   3 
   0  -3   7 48.2355 14.3854   4 
  -1   3  -7 10.4624 18.2754   3 
  -1   3  -7 28.6214 18.9522   2 
   1  -3   7 38.8899 18.8379   3 
   1  -3   7 59.8672 15.6776   4 
  -2   3  -7 2.04819 16.3368   3 
  -2   3  -7 22.7308 21.7884   2 
   2  -3   7 33.8173 18.1335   3 
   2  -3   7 13.0532 12.2297   4 
  -3   3  -7 63.1175 29.3069   3 
   3  -3   7 60.7450 22.2691   1 
   3  -3   7 54.7337 23.2192   3 
   3  -3   7 72.9107 18.2635   4 
   4  -3   7 7.32497 16.6969   1 
   4  -3   7 -11.377 17.7188   3 
   6   2  -7 3.86779 12.0358   4 
   6   2  -7 -19.975 18.0669   3 
  -6  -2   7 1.45944 16.7537   4 
   5   2  -7 46.4597 20.9747   3 
   5   2  -7 59.8637 16.0858   4 
  -5  -2   7 38.4293 17.0420   4 
   4   2  -7 95.1488 25.8601   3 
   4   2  -7 101.667 17.9247   4 
   4   2  -7 135.815 39.0490   2 
  -4  -2   7 134.503 21.4704   4 
   3   2  -7 119.566 23.8018   3 
   3   2  -7 151.114 29.7529   2 
   3   2  -7 118.481 24.8607   4 
  -3  -2   7 66.5876 15.8243   4 
   2   2  -7 181.700 24.1070   4 
   2   2  -7 180.856 30.9766   3 
   2   2  -7 197.351 32.6107   2 
  -2  -2   7 170.042 25.1743   4 
  -2  -2   7 163.608 28.8773   3 
   1   2  -7 197.330 29.7866   3 
   1   2  -7 171.803 29.6402   2 
  -1  -2   7 133.376 26.0882   3 
  -1  -2   7 126.592 20.0475   4 
   0   2  -7 407.877 44.8882   2 
   0   2  -7 357.477 42.9168   3 
   0  -2   7 361.445 30.7194   4 
   0  -2   7 514.456 42.7581   3 
  -1   2  -7 266.647 43.8772   2 
   1  -2   7 234.664 31.6138   3 
   1  -2   7 226.936 28.8598   4 
  -2   2  -7 -28.815 18.0800   3 
  -2   2  -7 -6.6912 16.8374   2 
   2  -2   7 0.20567 13.5781   1 
   2  -2   7 -17.134 13.8307   3 
   2  -2   7 -4.4639 10.4729   4 
  -3   2  -7 16.4821 17.9056   3 
  -3   2  -7 -31.538 16.2614   2 
   3  -2   7 15.1573 18.1151   4 
   3  -2   7 0.42872 15.8063   3 
   3  -2   7 31.2661 23.7968   2 
   3  -2   7 4.60334 17.6691   1 
   4  -2   7 10.4937 16.8029   1 
   4  -2   7 17.7691 16.2628   3 
   4  -2   7 52.2880 31.4380   2 
   6   1  -7 -0.1432 11.4812   4 
  -6  -1   7 -19.123 16.8536   4 
   5   1  -7 72.3486 27.2891   3 
   5   1  -7 96.5102 19.4775   4 
  -5  -1   7 132.036 22.2712   4 
   4   1  -7 134.930 27.3877   3 
   4   1  -7 138.728 21.7564   4 
  -4  -1   7 108.610 20.5501   4 
   3   1  -7 202.667 30.2679   2 
   3   1  -7 201.204 22.0926   4 
   3   1  -7 163.985 27.4062   3 
  -3  -1   7 181.657 24.5387   4 
   2   1  -7 398.568 66.4176   3 
   2   1  -7 380.708 29.5440   4 
   2   1  -7 469.501 39.3260   2 
  -2  -1   7 395.745 30.3118   4 
   1   1  -7 -0.1791 12.1092   3 
   1   1  -7 -11.050 12.6639   2 
   1   1  -7 18.6185 10.8362   4 
  -1  -1   7 7.00062 9.58755   4 
  -1  -1   7 3.71993 10.8364   3 
   0   1  -7 625.112 49.2782   2 
   0   1  -7 569.789 42.5322   3 
   0  -1   7 531.898 36.1809   4 
   0  -1   7 637.474 44.1382   3 
  -1   1  -7 86.0055 21.3173   3 
  -1   1  -7 69.0859 25.3853   2 
   1  -1   7 76.6871 15.6626   4 
   1  -1   7 93.6173 20.8248   3 
   1  -1   7 75.4607 40.3692   2 
  -2   1  -7 88.8075 21.0867   3 
  -2   1  -7 100.714 26.5457   2 
   2  -1   7 75.0330 16.8966   4 
   2  -1   7 128.456 29.9673   2 
   2  -1   7 112.535 20.8734   3 
  -3   1  -7 208.076 31.9203   3 
  -3   1  -7 241.453 41.8667   2 
   3  -1   7 180.329 38.9252   2 
   3  -1   7 300.060 32.3591   3 
   3  -1   7 223.535 25.1746   4 
   3  -1   7 220.665 34.5997   1 
  -4   1  -7 419.158 45.7681   2 
   4  -1   7 412.433 41.4207   1 
   4  -1   7 372.580 36.2023   3 
   4  -1   7 272.651 29.2085   4 
   4  -1   7 385.413 49.8704   2 
   5  -1   7 -28.268 19.2852   1 
   5  -1   7 -3.9193 24.2596   2 
   6   0  -7 35.9391 20.4735   3 
   6   0  -7 46.1457 14.4808   4 
  -6   0   7 44.8483 21.3697   4 
   5   0  -7 110.954 21.3334   4 
   5   0  -7 100.298 28.0006   3 
  -5   0   7 161.658 25.4553   4 
   4   0  -7 49.3504 14.8607   4 
   4   0  -7 53.2593 18.4217   3 
  -4   0   7 88.0726 20.5794   4 
   3   0  -7 9.05793 9.85856   4 
   3   0  -7 0.01251 13.1287   3 
  -3   0   7 24.7848 11.1467   4 
   2   0  -7 660.000 46.7212   3 
   2   0  -7 685.944 44.1834   2 
   2   0  -7 569.206 36.3407   4 
  -2   0   7 607.857 39.2286   4 
   1   0  -7 77.2856 19.3866   3 
   1   0  -7 131.024 24.6340   2 
   1   0  -7 87.5809 17.0645   4 
  -1   0   7 105.925 18.9828   4 
   0   0  -7 453.163 57.8796   2 
   0   0  -7 475.221 35.5706   3 
   0   0   7 406.474 41.9239   2 
   0   0   7 409.826 30.4470   4 
   0   0   7 467.118 35.5182   3 
  -1   0  -7 936.555 59.8310   2 
  -1   0  -7 899.913 50.9561   3 
   1   0   7 964.327 52.3819   3 
   1   0   7 876.220 47.7896   4 
   1   0   7 880.210 63.5620   2 
  -2   0  -7 193.062 35.4811   2 
  -2   0  -7 164.328 24.1595   3 
   2   0   7 156.071 23.2286   3 
   2   0   7 185.876 20.6199   4 
   2   0   7 217.580 47.2034   2 
  -3   0  -7 1119.54 70.6266   2 
   3   0   7 1098.46 76.7841   2 
   3   0   7 1190.31 65.4155   1 
   3   0   7 955.178 54.8209   4 
  -4   0  -7 990.443 71.9890   2 
   4   0   7 1040.56 75.2627   2 
   4   0   7 933.438 55.6640   4 
   4   0   7 1121.97 65.1581   1 
  -5   0  -7 176.568 37.3948   2 
   5   0   7 215.728 28.7298   4 
   5   0   7 188.036 35.2242   1 
   5   0   7 150.426 38.6066   2 
   6   0   7 178.009 35.4687   1 
   6   0   7 120.500 37.9786   2 
   6  -1  -7 38.9178 16.5799   4 
   6  -1  -7 60.4862 23.5486   3 
  -6   1   7 25.9934 17.9051   4 
   5  -1  -7 21.9690 15.9222   3 
   5  -1  -7 31.1082 12.8094   4 
  -5   1   7 8.20175 11.9695   4 
   4  -1  -7 162.498 28.1546   3 
   4  -1  -7 171.079 24.0371   4 
  -4   1   7 143.567 23.1071   4 
   3  -1  -7 39.1529 13.0010   4 
   3  -1  -7 33.3725 17.0743   3 
  -3   1   7 32.5516 14.1251   4 
   2  -1  -7 1530.49 73.0775   3 
   2  -1  -7 1342.35 63.9414   4 
  -2   1   7 1348.37 65.2804   4 
   1  -1  -7 136.270 24.2598   2 
   1  -1  -7 153.670 24.3207   3 
   1  -1  -7 172.895 22.4349   4 
  -1   1   7 138.258 20.1835   4 
  -1   1   7 166.245 29.6806   2 
   0  -1  -7 157.672 26.1704   2 
   0  -1  -7 113.927 19.7918   3 
   0  -1  -7 135.041 20.4786   4 
   0   1   7 139.174 29.1666   2 
   0   1   7 107.270 16.7301   4 
  -1  -1  -7 1742.02 75.1330   3 
   1   1   7 1782.20 76.1025   3 
   1   1   7 1662.42 74.3404   4 
   1   1   7 1827.24 91.1612   2 
  -2  -1  -7 2.17892 14.0297   2 
   2   1   7 26.4079 10.5631   4 
   2   1   7 19.1824 15.1826   1 
   2   1   7 27.0816 18.9997   2 
   2   1   7 19.8517 12.0468   3 
  -3  -1  -7 335.157 37.3626   2 
   3   1   7 297.597 27.4575   4 
   3   1   7 320.824 36.6304   1 
   3   1   7 340.272 41.0034   2 
  -4  -1  -7 127.931 30.6822   2 
   4   1   7 97.8004 18.2671   4 
   4   1   7 120.931 29.2811   1 
   4   1   7 104.677 30.4276   2 
  -5  -1  -7 2.87391 21.4242   2 
   5   1   7 14.1027 15.2357   4 
   5   1   7 28.1700 18.9307   1 
   5   1   7 29.3125 23.8691   2 
   6   1   7 10.4074 25.7731   2 
   6   1   7 80.6543 53.9251   1 
   6  -2  -7 6.52172 10.4230   4 
   6  -2  -7 -6.0678 14.4441   3 
   5  -2  -7 15.9990 11.3564   4 
   5  -2  -7 17.0768 17.6031   3 
  -5   2   7 40.6379 16.4710   4 
   4  -2  -7 40.9719 16.4164   3 
   4  -2  -7 68.9178 15.4990   4 
  -4   2   7 75.9983 18.0408   4 
   3  -2  -7 19.5337 14.3024   3 
   3  -2  -7 36.5979 12.1735   4 
  -3   2   7 23.1632 10.5344   4 
   2  -2  -7 146.419 19.2992   4 
   2  -2  -7 122.860 22.8875   3 
  -2   2   7 115.031 18.4456   4 
   1  -2  -7 32.3442 13.2329   2 
   1  -2  -7 57.9229 13.8733   4 
   1  -2  -7 26.2408 13.3749   3 
  -1   2   7 49.3076 19.8526   2 
  -1   2   7 29.9735 12.3289   4 
   0  -2  -7 66.8515 18.6874   2 
   0  -2  -7 75.8544 16.6441   3 
   0  -2  -7 71.7295 15.0976   4 
   0   2   7 73.4087 21.9874   2 
   0   2   7 34.6685 11.6580   4 
  -1  -2  -7 60.5677 13.6994   3 
  -1  -2  -7 60.8588 22.4640   2 
   1   2   7 68.3573 23.2141   2 
   1   2   7 75.4245 18.1196   4 
  -2  -2  -7 3.07854 13.4840   2 
   2   2   7 3.45130 8.74091   4 
   2   2   7 1.88557 14.9114   2 
  -3  -2  -7 115.855 29.0881   2 
   3   2   7 105.001 27.5986   2 
   3   2   7 138.366 26.2269   1 
   3   2   7 158.408 20.8137   4 
  -4  -2  -7 88.5287 25.8583   2 
   4   2   7 117.750 29.4968   2 
   4   2   7 105.834 19.1469   4 
   4   2   7 107.631 22.6783   1 
  -5  -2  -7 -11.935 16.7422   2 
   5   2   7 13.6835 18.9257   1 
   5   2   7 -7.1471 10.2216   4 
   5   2   7 32.2103 18.0862   2 
  -6  -2  -7 -7.8168 20.1625   2 
   6   2   7 -8.0976 17.9824   1 
   6   2   7 -12.050 22.3678   2 
   6  -3  -7 82.5399 20.9085   4 
   5  -3  -7 -6.1553 9.99915   4 
  -5   3   7 -5.5896 8.70945   4 
   4  -3  -7 250.586 25.4710   4 
  -4   3   7 205.636 27.4075   4 
   3  -3  -7 9.72196 8.76068   4 
  -3   3   7 1.82390 9.70714   4 
   2  -3  -7 106.070 18.9847   3 
   2  -3  -7 108.909 17.2116   4 
  -2   3   7 71.7738 13.8890   4 
   1  -3  -7 358.998 27.2717   4 
   1  -3  -7 355.194 29.2794   2 
   1  -3  -7 398.552 32.4081   3 
  -1   3   7 357.798 27.0086   4 
  -1   3   7 408.656 33.8543   2 
   0  -3  -7 165.274 19.2273   4 
   0  -3  -7 209.734 22.8111   3 
   0  -3  -7 201.203 24.1779   2 
   0   3   7 268.050 31.7621   2 
   0   3   7 168.058 18.6542   4 
  -1  -3  -7 829.529 51.8709   2 
   1   3   7 877.062 55.5136   2 
   1   3   7 816.211 42.2786   4 
  -2  -3  -7 175.705 29.0658   2 
   2   3   7 134.793 25.0130   4 
   2   3   7 169.990 32.7988   2 
  -3  -3  -7 106.303 24.7392   2 
   3   3   7 52.2383 14.1763   4 
   3   3   7 68.0896 23.0219   2 
  -4  -3  -7 129.212 28.3659   2 
   4   3   7 118.823 17.9173   4 
   4   3   7 96.6440 23.8492   1 
   4   3   7 93.6583 24.9747   2 
  -5  -3  -7 158.650 33.1486   2 
   5   3   7 116.981 21.2793   4 
   5   3   7 76.2692 23.1460   1 
   5   3   7 126.898 32.5635   2 
  -6  -3  -7 -23.109 18.6939   2 
   6   3   7 -16.083 18.9875   2 
   6   3   7 -19.936 10.9302   4 
   6   3   7 16.3860 18.6846   1 
   6  -4  -7 85.8689 19.6737   4 
   5  -4  -7 12.5432 13.2201   4 
  -5   4   7 24.0872 22.0549   4 
   4  -4  -7 646.002 41.7604   4 
  -4   4   7 649.232 43.8297   4 
   3  -4  -7 75.0048 15.7307   4 
  -3   4   7 86.2424 18.1097   4 
   2  -4  -7 200.417 21.3029   4 
  -2   4   7 149.878 21.8252   4 
  -2   4   7 190.000 22.4553   1 
   1  -4  -7 592.585 35.3399   4 
   1  -4  -7 569.210 36.1985   2 
  -1   4   7 614.768 35.1001   1 
  -1   4   7 565.759 35.4055   4 
  -1   4   7 587.862 40.9072   2 
   0  -4  -7 118.937 17.7861   4 
   0  -4  -7 157.440 24.0995   2 
   0  -4  -7 131.001 19.5058   3 
   0   4   7 143.885 16.4436   4 
   0   4   7 175.260 26.1516   2 
  -1  -4  -7 1643.30 76.6883   2 
  -1  -4  -7 1446.38 66.6319   4 
   1   4   7 1590.17 78.6485   2 
   1   4   7 1561.70 66.3851   4 
  -2  -4  -7 610.105 52.0487   2 
   2   4   7 606.805 35.1018   4 
   2   4   7 682.945 49.5159   2 
  -3  -4  -7 79.5592 21.3745   2 
   3   4   7 87.4100 14.9856   4 
   3   4   7 136.551 27.4801   2 
  -4  -4  -7 598.110 48.3180   2 
   4   4   7 606.673 52.0251   2 
   4   4   7 596.879 36.8327   4 
  -5  -4  -7 421.792 42.5569   2 
   5   4   7 412.995 42.9935   1 
   5   4   7 416.599 31.5297   4 
   5   4   7 414.506 46.5366   2 
  -6  -4  -7 -8.0360 20.3743   2 
   6   4   7 62.4401 16.2451   4 
   6   4   7 29.1191 22.5749   2 
   6   4   7 73.9054 23.9127   1 
   7   4   7 300.477 49.4824   2 
   6  -5  -7 156.425 24.6065   1 
   6  -5  -7 119.145 25.3145   4 
  -6   5   7 123.878 53.8179   1 
   5  -5  -7 21.0131 11.1167   4 
  -5   5   7 21.5318 19.0526   1 
   4  -5  -7 288.877 29.0607   4 
  -4   5   7 334.569 31.5049   4 
  -4   5   7 336.354 33.2156   1 
   3  -5  -7 14.6812 16.9830   4 
  -3   5   7 33.7165 13.3368   4 
  -3   5   7 38.0129 13.4821   1 
   2  -5  -7 147.887 21.3879   4 
  -2   5   7 144.296 21.8787   1 
  -2   5   7 158.031 21.8002   4 
   1  -5  -7 1738.81 74.5851   4 
  -1   5   7 1874.71 80.1131   2 
  -1   5   7 1795.93 76.3618   4 
  -1   5   7 1715.72 74.4066   1 
   0  -5  -7 403.706 27.8475   4 
   0   5   7 408.393 28.3620   4 
   0   5   7 430.510 35.0803   2 
  -1  -5  -7 1702.89 80.4834   2 
  -1  -5  -7 1639.90 70.6978   4 
   1   5   7 1700.80 69.8873   4 
   1   5   7 1746.48 84.5361   2 
  -2  -5  -7 274.220 29.3892   2 
   2   5   7 269.520 34.6291   2 
   2   5   7 239.326 21.0209   4 
  -3  -5  -7 188.138 32.3897   2 
   3   5   7 172.330 18.5581   4 
   3   5   7 168.867 31.0614   2 
  -4  -5  -7 445.574 41.6321   2 
   4   5   7 498.377 49.1356   2 
   4   5   7 475.828 31.3832   4 
  -5  -5  -7 335.998 40.0725   2 
   5   5   7 379.014 44.1418   2 
   5   5   7 317.196 26.6190   4 
   6   5   7 98.0639 29.3669   1 
   6   5   7 104.407 19.9080   4 
   6   5   7 84.6459 32.5021   2 
   7   5   7 147.892 25.0359   4 
   7   5   7 151.727 38.4052   2 
   6  -6  -7 59.8578 17.7108   4 
   6  -6  -7 93.6035 20.9564   1 
  -6   6   7 22.4965 36.3070   1 
   5  -6  -7 79.6141 19.6854   1 
   5  -6  -7 65.7009 16.7123   4 
  -5   6   7 101.743 28.8932   1 
   4  -6  -7 -12.445 7.55119   4 
  -4   6   7 2.56183 14.2337   4 
  -4   6   7 -3.3183 15.0572   1 
   3  -6  -7 13.5079 9.32939   4 
  -3   6   7 21.2954 14.3068   1 
  -3   6   7 6.66123 11.9629   4 
   2  -6  -7 37.9567 12.5170   4 
  -2   6   7 36.5682 13.6278   1 
  -2   6   7 37.3913 13.8446   4 
   1  -6  -7 38.5005 11.0600   4 
  -1   6   7 57.3484 16.2039   1 
  -1   6   7 65.4917 17.0816   2 
  -1   6   7 48.1259 12.9890   4 
   0  -6  -7 28.9486 10.5262   4 
   0   6   7 56.5225 20.8957   2 
   0   6   7 22.0710 10.2296   4 
   0   6   7 42.8117 12.5497   1 
  -1  -6  -7 109.909 17.0367   4 
   1   6   7 166.684 27.8178   2 
   1   6   7 144.873 16.6929   4 
   2   6   7 45.2283 11.2071   4 
   2   6   7 33.3185 21.1764   2 
   3   6   7 322.738 23.7499   4 
   4   6   7 164.235 34.2270   2 
   4   6   7 174.995 21.8781   4 
   5   6   7 113.547 31.8159   2 
   5   6   7 129.195 18.7662   4 
   6   6   7 -17.015 18.3041   2 
   6   6   7 26.3571 14.3247   4 
   6   6   7 -8.5917 16.8272   1 
   5  -7  -7 229.331 32.1961   1 
   5  -7  -7 222.109 31.5527   4 
  -5   7   7 289.499 49.5229   1 
   4  -7  -7 104.238 21.2648   4 
  -4   7   7 111.615 24.0472   1 
   3  -7  -7 24.9003 11.5465   4 
  -3   7   7 40.6443 16.4018   1 
  -3   7   7 48.3937 18.0508   4 
   2  -7  -7 97.5957 17.8784   4 
  -2   7   7 121.447 22.6373   1 
  -2   7   7 125.014 19.0032   4 
   1  -7  -7 31.1557 11.5728   4 
  -1   7   7 35.0572 18.8005   2 
  -1   7   7 58.7716 14.9761   4 
  -1   7   7 56.6629 17.7313   1 
   0  -7  -7 20.9058 10.0796   4 
   0   7   7 32.1435 13.5828   1 
   0   7   7 33.5056 15.6287   2 
   0   7   7 14.6351 9.57785   4 
  -1  -7  -7 48.9560 12.3772   4 
   1   7   7 22.9080 20.2447   2 
   1   7   7 59.0163 11.3144   4 
   1   7   7 54.6794 14.7918   1 
   2   7   7 277.536 22.3425   4 
   2   7   7 266.347 39.2026   2 
   3   7   7 64.4565 22.7763   2 
   3   7   7 33.2985 9.18522   4 
   4   7   7 8.32544 8.60819   4 
   4   7   7 -10.844 16.5824   2 
   5   7   7 29.5100 23.9456   2 
   5   7   7 20.5873 11.9151   4 
   6   7   7 41.1917 13.8757   4 
   6   7   7 25.7301 26.3669   2 
   5  -8  -7 41.6932 16.3629   4 
   4  -8  -7 259.731 29.5119   4 
  -4   8   7 247.550 40.6116   1 
   3  -8  -7 52.7889 15.2112   4 
  -3   8   7 37.1081 20.8866   1 
   2  -8  -7 15.6746 14.2347   4 
  -2   8   7 7.54613 14.5535   1 
  -2   8   7 24.2111 15.1836   4 
   1  -8  -7 73.5373 14.1336   4 
  -1   8   7 80.1539 15.4184   4 
  -1   8   7 123.189 25.0377   2 
  -1   8   7 50.5637 17.1703   1 
   0  -8  -7 465.905 37.4001   3 
   0  -8  -7 467.911 30.7904   4 
   0   8   7 493.517 36.0563   1 
   0   8   7 501.520 32.5773   4 
   0   8   7 515.094 40.9367   2 
  -1  -8  -7 49.3757 12.9235   4 
   1   8   7 69.0651 14.1181   4 
   1   8   7 48.3576 21.6620   2 
   1   8   7 53.6946 16.5551   1 
   2   8   7 390.525 25.3695   4 
   2   8   7 441.422 42.8261   2 
   3   8   7 196.011 36.1194   2 
   3   8   7 274.829 19.5997   4 
   4   8   7 108.170 31.1810   2 
   4   8   7 115.378 15.0413   4 
   5   8   7 414.653 26.7791   4 
   5   8   7 350.480 54.3980   2 
   6   8   7 10.8528 12.4995   4 
   6   8   7 2.79401 29.5345   2 
   4  -9  -7 8.52088 13.5907   4 
   3  -9  -7 131.149 20.8061   4 
   3  -9  -7 176.923 37.2043   3 
  -3   9   7 125.518 29.5233   1 
   2  -9  -7 15.7604 10.3667   4 
   2  -9  -7 34.0152 20.4350   3 
  -2   9   7 47.2481 21.3192   2 
  -2   9   7 3.13018 18.5384   1 
   1  -9  -7 292.319 25.9704   4 
   1  -9  -7 266.885 34.0804   3 
  -1   9   7 194.040 29.0095   1 
  -1   9   7 269.999 34.5266   2 
   0  -9  -7 802.346 52.2056   3 
   0  -9  -7 880.095 44.4743   4 
   0   9   7 926.516 45.5769   4 
   0   9   7 859.162 53.6292   1 
   0   9   7 943.597 69.3856   2 
  -1  -9  -7 15.9643 9.67785   4 
   1   9   7 10.2313 13.7728   1 
   1   9   7 7.29753 19.1205   2 
   1   9   7 13.0073 9.78414   4 
   2   9   7 585.287 41.5999   1 
   2   9   7 619.327 32.5297   4 
   2   9   7 636.164 52.8516   2 
   3   9   7 469.303 47.7268   2 
   4   9   7 179.321 39.1652   2 
   5   9   7 110.418 36.9822   2 
   3 -10  -7 97.9573 21.7748   4 
   2 -10  -7 -51.077 21.2096   3 
   2 -10  -7 4.40147 10.5895   4 
  -2  10   7 2.58769 19.4947   2 
   1 -10  -7 18.8967 10.9522   4 
   1 -10  -7 58.1170 23.4072   3 
  -1  10   7 14.0882 16.6748   1 
  -1  10   7 67.7946 25.5406   2 
   0 -10  -7 120.527 22.1663   3 
   0 -10  -7 156.511 18.2993   4 
   0  10   7 161.493 31.8541   2 
   0  10   7 147.042 24.4006   1 
  -1 -10  -7 10.8960 15.2588   3 
   1  10   7 32.8656 21.3167   2 
   1  10   7 17.7776 15.5554   1 
   2  10   7 57.0337 26.0704   2 
   2  10   7 20.1970 16.1975   1 
   3  10   7 73.1975 26.7379   2 
   3  10   7 37.2078 17.3491   1 
   4  10   7 19.8326 28.4853   2 
   5  10   7 -4.5403 25.2655   2 
   1 -11  -7 23.8468 13.2398   4 
   1 -11  -7 0.96827 23.6329   3 
  -1  11   7 42.6480 25.2452   2 
   0 -11  -7 8.36062 11.8289   4 
   0 -11  -7 -20.789 18.6794   3 
   0  11   7 -5.2387 20.0421   2 
  -1 -11  -7 63.9849 21.5359   3 
   1  11   7 89.9886 30.2142   2 
   2  11   7 30.3865 22.0271   2 
   3  11   7 38.2023 31.7930   2 
   4  11   7 -12.583 29.2142   2 
   3   4  -8 170.396 40.5607   2 
   3   4  -8 144.516 33.9362   3 
  -3  -4   8 168.181 47.3348   4 
   2   4  -8 9.01884 27.8269   2 
   2   4  -8 26.2392 23.7038   3 
  -2  -4   8 -4.7905 19.6355   4 
  -1  -4   8 139.122 25.4447   4 
   0   4  -8 92.1480 49.8026   3 
   0  -4   8 107.920 22.3049   4 
   4   3  -8 89.5864 32.8786   2 
   4   3  -8 120.699 22.4650   4 
   4   3  -8 71.3572 26.6787   3 
  -4  -3   8 77.4782 29.3928   4 
   3   3  -8 187.722 35.4751   2 
   3   3  -8 78.2804 27.1929   3 
  -3  -3   8 72.6253 22.2516   4 
   2   3  -8 248.352 41.8071   2 
   2   3  -8 153.131 33.8721   3 
  -2  -3   8 194.832 28.2364   4 
  -2  -3   8 160.684 30.4615   3 
   1   3  -8 76.3973 37.2105   2 
   1   3  -8 48.9321 22.0629   3 
  -1  -3   8 45.3952 15.2959   4 
  -1  -3   8 49.9599 17.5532   3 
   0   3  -8 -23.951 16.4698   3 
   0   3  -8 31.3449 25.7287   2 
   0  -3   8 -15.134 19.9885   3 
   0  -3   8 4.77042 12.3546   4 
  -1   3  -8 109.581 41.6543   2 
  -1   3  -8 45.0426 23.4599   3 
   1  -3   8 93.6130 19.2986   4 
   1  -3   8 63.6616 24.2699   3 
  -2   3  -8 -28.636 23.2279   3 
   2  -3   8 11.0559 21.8557   4 
   2  -3   8 -21.171 20.1531   3 
   5   2  -8 0.69984 18.8594   3 
   5   2  -8 -13.112 12.0557   4 
  -5  -2   8 -31.262 17.3639   4 
   4   2  -8 18.3001 11.6228   4 
   4   2  -8 11.3807 19.0164   3 
   4   2  -8 49.9926 20.3436   2 
  -4  -2   8 15.9391 16.2033   4 
   3   2  -8 116.326 30.5421   2 
   3   2  -8 81.7273 17.3523   4 
   3   2  -8 60.7297 20.3240   3 
  -3  -2   8 42.8866 14.5655   4 
   2   2  -8 137.957 30.3720   2 
   2   2  -8 139.837 28.5052   3 
  -2  -2   8 175.987 26.6772   4 
   1   2  -8 427.509 46.5804   2 
   1   2  -8 342.951 39.8691   3 
  -1  -2   8 402.922 41.3807   3 
  -1  -2   8 480.887 33.8919   4 
   0   2  -8 -3.4487 19.6032   2 
   0   2  -8 9.91532 14.7467   3 
   0  -2   8 -21.285 14.2524   3 
   0  -2   8 -11.716 10.2844   4 
  -1   2  -8 50.9572 18.3601   3 
   1  -2   8 61.7681 20.3691   3 
   1  -2   8 32.6984 12.0592   4 
  -2   2  -8 17.2033 20.6030   2 
  -2   2  -8 -31.142 15.3800   3 
   2  -2   8 9.62547 10.1219   4 
   2  -2   8 -24.397 15.7663   3 
  -3   2  -8 -0.9153 21.7940   3 
   3  -2   8 55.0227 20.1875   3 
   3  -2   8 20.0752 21.0837   1 
   5   1  -8 59.5942 16.9397   4 
  -5  -1   8 49.8148 22.2844   4 
   4   1  -8 21.9885 10.4620   4 
   4   1  -8 3.82269 14.4150   3 
  -4  -1   8 67.2543 19.0616   4 
   3   1  -8 345.313 30.4649   4 
   3   1  -8 415.234 43.4550   3 
   3   1  -8 429.916 48.5653   2 
  -3  -1   8 445.340 34.4049   4 
   2   1  -8 14.4170 18.5114   2 
   2   1  -8 11.5820 15.3789   3 
   2   1  -8 1.61578 10.5332   4 
  -2  -1   8 8.97757 9.48493   4 
   1   1  -8 439.696 40.2703   3 
   1   1  -8 448.744 43.4161   2 
  -1  -1   8 358.137 31.1880   4 
  -1  -1   8 491.517 40.8399   3 
   0   1  -8 89.0744 22.2718   3 
   0   1  -8 98.8819 26.7857   2 
   0  -1   8 58.0899 14.4157   4 
   0  -1   8 75.0027 20.7137   3 
  -1   1  -8 86.0778 25.4205   2 
   1  -1   8 90.7840 21.3550   3 
   1  -1   8 36.6128 24.8405   2 
   1  -1   8 67.1444 16.0486   4 
  -2   1  -8 333.739 61.5669   3 
  -2   1  -8 265.501 40.2995   2 
   2  -1   8 239.397 26.3736   4 
   2  -1   8 252.091 46.7820   2 
   2  -1   8 372.883 37.5717   3 
  -3   1  -8 123.213 32.1148   3 
  -3   1  -8 141.356 38.6507   2 
   3  -1   8 160.146 28.7231   3 
   3  -1   8 173.356 43.8211   2 
   3  -1   8 113.944 23.7174   4 
   3  -1   8 187.627 27.6880   1 
   4  -1   8 12.4212 19.2996   3 
   4  -1   8 5.33116 21.2398   1 
   6   0  -8 107.279 33.5782   4 
   6   0  -8 121.851 29.7575   3 
   5   0  -8 140.831 31.3366   3 
   5   0  -8 165.057 24.0440   4 
  -5   0   8 151.491 26.6062   4 
   4   0  -8 70.8397 16.8985   4 
   4   0  -8 50.6029 20.7340   3 
  -4   0   8 61.8177 17.9967   4 
   3   0  -8 911.107 50.0202   4 
   3   0  -8 974.890 62.1519   3 
  -3   0   8 802.888 50.2415   4 
   2   0  -8 245.285 30.2887   3 
   2   0  -8 180.356 30.2545   2 
   2   0  -8 180.917 24.0959   4 
  -2   0   8 176.249 25.3858   4 
   1   0  -8 242.898 25.9092   4 
   1   0  -8 209.629 30.3817   3 
   1   0  -8 227.190 34.7092   2 
  -1   0   8 244.961 25.7077   4 
   0   0  -8 532.182 41.2093   3 
   0   0  -8 484.525 44.2342   2 
   0   0   8 494.214 35.8852   4 
   0   0   8 533.365 49.5236   2 
   0   0   8 524.532 39.2466   3 
  -1   0  -8 44.2079 18.0508   3 
  -1   0  -8 85.6675 25.1640   2 
   1   0   8 52.7840 13.3379   4 
   1   0   8 68.7234 23.7048   2 
   1   0   8 43.5329 15.4906   3 
  -2   0  -8 243.796 30.9750   3 
  -2   0  -8 315.493 47.2718   2 
   2   0   8 321.049 35.6168   1 
   2   0   8 218.878 24.8785   4 
   2   0   8 230.957 41.9679   2 
  -3   0  -8 395.334 38.0973   3 
  -3   0  -8 431.031 48.6098   2 
   3   0   8 364.583 47.3608   2 
   3   0   8 309.460 31.4035   4 
   3   0   8 430.152 41.2304   1 
  -4   0  -8 213.522 37.3331   2 
   4   0   8 235.740 30.1851   4 
   4   0   8 148.946 41.2865   2 
   4   0   8 207.398 34.9100   1 
   5   0   8 302.740 56.4658   1 
   5   0   8 240.784 50.9216   2 
   6  -1  -8 46.3532 26.0204   4 
   6  -1  -8 32.9056 21.9920   3 
   5  -1  -8 40.2780 23.3520   3 
   5  -1  -8 37.4151 14.7312   4 
  -5   1   8 68.9899 20.4910   4 
   4  -1  -8 14.6502 8.74244   4 
   4  -1  -8 20.0242 17.8625   3 
  -4   1   8 40.5516 17.5084   4 
   3  -1  -8 715.624 51.5884   3 
   3  -1  -8 729.397 44.3742   4 
  -3   1   8 658.836 44.3334   4 
   2  -1  -8 -3.9259 12.0271   3 
   2  -1  -8 27.0021 19.4386   2 
   2  -1  -8 5.67031 9.02479   4 
  -2   1   8 9.78763 10.8416   4 
   1  -1  -8 66.7229 20.1255   2 
   1  -1  -8 47.9265 15.0130   4 
   1  -1  -8 49.7656 18.2767   3 
  -1   1   8 72.7048 15.3252   4 
  -1   1   8 49.7258 20.8515   2 
   0  -1  -8 564.116 38.8560   3 
   0  -1  -8 433.052 41.1298   2 
   0   1   8 487.223 34.2057   4 
   0   1   8 595.118 49.2579   2 
  -1  -1  -8 42.6543 16.7591   3 
  -1  -1  -8 50.7786 20.0858   2 
   1   1   8 39.4966 10.7751   4 
   1   1   8 6.89630 10.2312   3 
   1   1   8 78.6657 25.1718   2 
  -2  -1  -8 297.858 34.3524   2 
   2   1   8 259.146 26.3468   4 
   2   1   8 330.961 43.0026   2 
  -3  -1  -8 294.567 44.7304   2 
   3   1   8 284.017 28.2176   4 
   3   1   8 233.459 40.4876   2 
   3   1   8 309.122 35.7515   1 
  -4  -1  -8 40.6123 20.3666   2 
   4   1   8 54.2103 22.1789   1 
   4   1   8 63.7600 16.5114   4 
   4   1   8 65.4686 29.6574   2 
   5   1   8 70.0100 27.6294   2 
   5   1   8 123.280 28.4663   1 
   6  -2  -8 13.7868 19.0643   4 
   6  -2  -8 48.9284 24.6485   3 
   5  -2  -8 24.9694 18.4025   3 
   5  -2  -8 13.1837 12.4186   4 
  -5   2   8 -2.6063 13.3555   4 
   4  -2  -8 16.2227 18.1457   3 
   4  -2  -8 -4.5227 9.14007   4 
  -4   2   8 -8.5768 9.88817   4 
   3  -2  -8 37.1452 13.4699   4 
   3  -2  -8 18.3794 14.6618   3 
  -3   2   8 15.7591 10.1391   4 
   2  -2  -8 7.67539 14.0354   3 
   2  -2  -8 23.6856 10.9726   2 
  -2   2   8 6.81961 8.19751   4 
   1  -2  -8 58.7523 15.6430   4 
   1  -2  -8 46.9717 16.7463   2 
   1  -2  -8 60.2636 17.8202   3 
  -1   2   8 62.8797 15.0491   4 
  -1   2   8 96.8563 23.3796   2 
   0  -2  -8 8.93998 12.2341   3 
   0  -2  -8 19.1317 12.3823   4 
   0  -2  -8 26.7311 15.4077   2 
   0   2   8 11.8817 18.4772   2 
   0   2   8 22.5550 9.73310   4 
  -1  -2  -8 112.784 19.9163   3 
  -1  -2  -8 112.038 25.0583   2 
   1   2   8 100.276 26.9005   2 
   1   2   8 135.322 20.1331   4 
  -2  -2  -8 17.6468 15.4141   2 
   2   2   8 10.1610 9.33429   4 
  -3  -2  -8 138.233 28.4374   2 
   3   2   8 140.652 21.6814   4 
   3   2   8 160.194 30.4212   1 
   3   2   8 184.730 34.2246   2 
  -4  -2  -8 38.1164 19.9274   2 
   4   2   8 64.6406 15.1812   4 
   4   2   8 17.7179 20.5072   2 
   4   2   8 16.7836 16.7704   1 
  -5  -2  -8 130.318 30.4232   2 
   5   2   8 140.455 27.7754   1 
   5   2   8 86.5912 34.2473   2 
   5   2   8 62.6182 18.5678   4 
   6   2   8 9.93189 19.5461   1 
   6   2   8 -3.8748 26.6058   2 
   6  -3  -8 8.51504 12.5635   4 
   6  -3  -8 9.61693 20.6498   3 
   5  -3  -8 266.142 28.4086   4 
   5  -3  -8 242.100 36.9406   3 
  -5   3   8 332.120 40.4494   4 
   4  -3  -8 48.7360 14.9136   4 
   4  -3  -8 29.3891 18.1730   3 
  -4   3   8 30.5959 14.1193   4 
   3  -3  -8 43.4090 12.9590   4 
   3  -3  -8 37.8143 18.8895   3 
  -3   3   8 17.9340 12.0604   4 
   2  -3  -8 108.527 22.8992   3 
   2  -3  -8 96.6649 18.6826   4 
  -2   3   8 56.5784 16.0101   4 
   1  -3  -8 5.22095 11.8544   3 
   1  -3  -8 17.9643 11.0310   2 
   1  -3  -8 6.70716 9.25066   4 
  -1   3   8 11.8036 10.4719   4 
  -1   3   8 23.1057 16.0730   2 
   0  -3  -8 328.559 29.7560   3 
   0  -3  -8 283.479 25.6252   4 
   0  -3  -8 345.009 33.4274   2 
   0   3   8 383.152 38.2093   2 
   0   3   8 307.349 25.9802   4 
  -1  -3  -8 180.750 31.7512   2 
   1   3   8 182.182 20.5840   4 
   1   3   8 212.907 36.3887   2 
  -2  -3  -8 30.2829 15.3887   2 
   2   3   8 37.3697 23.6623   2 
   2   3   8 28.5648 11.1256   4 
  -3  -3  -8 146.663 31.5053   2 
   3   3   8 130.519 30.1022   2 
   3   3   8 114.498 18.7145   4 
  -4  -3  -8 153.820 31.4985   2 
   4   3   8 147.646 21.8508   4 
   4   3   8 207.092 39.3828   2 
   4   3   8 214.431 35.2924   1 
  -5  -3  -8 97.0192 30.6771   2 
   5   3   8 138.108 33.4593   2 
   5   3   8 85.9944 26.8065   1 
   5   3   8 111.678 19.8691   4 
   6   3   8 42.6577 27.8199   1 
   6   3   8 57.5333 39.7107   2 
   6  -4  -8 33.7472 14.1001   4 
   5  -4  -8 225.902 30.2367   4 
  -5   4   8 197.743 30.6374   4 
   4  -4  -8 4.68890 11.4698   4 
  -4   4   8 16.6149 12.9670   4 
   3  -4  -8 136.219 22.0329   4 
  -3   4   8 163.668 24.8361   4 
   2  -4  -8 1046.95 57.9937   3 
   2  -4  -8 927.302 55.6931   4 
  -2   4   8 838.211 50.3057   4 
   1  -4  -8 403.953 35.1548   3 
   1  -4  -8 411.720 31.0905   4 
   1  -4  -8 444.822 33.6745   2 
  -1   4   8 425.742 31.5708   4 
  -1   4   8 472.628 39.8003   2 
   0  -4  -8 1077.62 58.8247   2 
   0  -4  -8 973.130 51.8142   4 
   0  -4  -8 1022.43 54.8342   3 
   0   4   8 1149.24 64.9906   2 
   0   4   8 1023.59 51.9235   4 
  -1  -4  -8 621.483 39.4768   4 
  -1  -4  -8 710.792 48.5004   2 
   1   4   8 599.034 37.3877   4 
   1   4   8 702.455 52.3185   2 
  -2  -4  -8 68.4924 20.5868   2 
   2   4   8 58.9770 13.5592   4 
   2   4   8 96.3964 26.1094   2 
  -3  -4  -8 503.131 44.9361   2 
   3   4   8 590.131 51.9472   2 
   3   4   8 450.758 32.5915   4 
  -4  -4  -8 25.5163 19.6696   2 
   4   4   8 52.0579 21.3261   2 
   4   4   8 10.7009 10.8803   4 
  -5  -4  -8 285.933 47.4107   2 
   5   4   8 236.281 37.3175   1 
   5   4   8 229.787 45.0859   2 
   5   4   8 255.061 30.4312   4 
   6   4   8 304.567 31.3305   4 
   6   4   8 233.189 45.8447   1 
   5  -5  -8 150.028 25.5593   4 
  -5   5   8 150.379 29.2008   4 
   4  -5  -8 69.5744 16.7870   4 
  -4   5   8 114.258 21.4759   4 
  -4   5   8 78.8725 20.1491   1 
   3  -5  -8 50.4472 14.8530   4 
  -3   5   8 62.1507 19.4025   1 
  -3   5   8 53.9971 16.9670   4 
  -2   5   8 757.932 46.6623   1 
  -2   5   8 865.243 48.5442   4 
   1  -5  -8 128.240 19.7729   4 
  -1   5   8 220.934 29.7453   2 
  -1   5   8 154.686 21.8717   4 
   0  -5  -8 1956.84 81.4407   3 
   0  -5  -8 1685.40 77.3239   4 
   0  -5  -8 1819.01 84.6717   2 
   0   5   8 1712.78 77.8985   4 
   0   5   8 2060.23 90.6955   2 
  -1  -5  -8 53.9421 14.9888   4 
  -1  -5  -8 95.1416 21.7495   2 
   1   5   8 61.6579 14.7900   4 
   1   5   8 49.5097 22.3484   2 
  -2  -5  -8 27.1922 17.4935   2 
   2   5   8 -12.049 15.9318   2 
   2   5   8 5.98468 7.80907   4 
  -3  -5  -8 352.080 37.3672   2 
   3   5   8 314.262 26.3695   4 
   3   5   8 411.762 41.7301   2 
  -4  -5  -8 266.166 42.9829   2 
   4   5   8 226.317 41.0152   2 
   4   5   8 259.801 24.8576   4 
  -5  -5  -8 95.9438 27.9583   2 
   5   5   8 70.2253 28.8081   2 
   5   5   8 140.777 21.6624   4 
   6   5   8 158.977 60.0262   2 
   6   5   8 172.520 45.3036   1 
   6   5   8 232.867 27.2991   4 
   5  -6  -8 39.1733 13.2104   4 
  -5   6   8 33.2880 33.1644   1 
   4  -6  -8 23.6141 12.6673   4 
  -4   6   8 32.7006 16.1669   4 
  -4   6   8 15.2413 17.4903   1 
   3  -6  -8 14.4210 9.59056   4 
  -3   6   8 -5.2739 16.0036   1 
  -3   6   8 -0.3893 10.2031   4 
   2  -6  -8 45.0805 13.8438   4 
  -2   6   8 20.0309 13.7769   1 
  -2   6   8 29.2872 12.9040   4 
   1  -6  -8 14.4181 9.99956   4 
  -1   6   8 3.62598 9.27427   4 
  -1   6   8 16.5712 11.2084   1 
  -1   6   8 19.9630 15.9267   2 
   0  -6  -8 9.55554 8.30854   4 
   0   6   8 -2.3530 14.4317   2 
   0   6   8 1.14059 11.3673   1 
   0   6   8 13.4832 8.24997   4 
  -1  -6  -8 81.3274 14.9169   4 
   1   6   8 93.8423 26.5652   2 
   1   6   8 83.9842 18.5219   4 
   2   6   8 152.886 21.5522   4 
   2   6   8 219.120 37.0377   2 
   3   6   8 251.680 39.3848   2 
   3   6   8 230.448 23.0167   4 
   4   6   8 160.300 33.4449   2 
   4   6   8 150.168 20.5732   4 
   5   6   8 4.36326 24.0177   2 
   5   6   8 0.96436 10.2825   4 
   6   6   8 149.912 22.5299   4 
   6   6   8 74.3924 40.8258   2 
   6   6   8 127.335 35.8786   1 
   5  -7  -8 72.4247 18.7422   4 
  -5   7   8 73.6436 36.3183   1 
   4  -7  -8 78.8148 18.4443   4 
  -4   7   8 51.8443 28.0666   1 
   3  -7  -8 28.8729 11.0710   4 
  -3   7   8 -4.6671 16.1752   1 
  -3   7   8 29.6189 12.7380   4 
   2  -7  -8 81.6320 17.6283   4 
  -2   7   8 76.1197 17.5607   4 
  -2   7   8 47.4556 16.9751   1 
   1  -7  -8 7.19348 10.4994   4 
  -1   7   8 37.4067 17.8631   2 
  -1   7   8 6.71252 11.4476   1 
  -1   7   8 -2.6792 10.2805   4 
   0  -7  -8 42.4467 10.3677   4 
   0   7   8 38.3825 12.6245   4 
   0   7   8 68.9019 19.3375   1 
   0   7   8 46.4359 22.4635   2 
  -1  -7  -8 52.8451 13.4987   4 
   1   7   8 105.212 26.1313   2 
   1   7   8 90.1230 19.0797   4 
   2   7   8 46.0055 11.2926   4 
   2   7   8 55.5245 25.1495   2 
   3   7   8 9.52129 22.9152   2 
   3   7   8 0.50113 8.69959   4 
   4   7   8 8.01371 23.6240   2 
   4   7   8 -6.9646 8.96202   4 
   5   7   8 -4.4023 11.0480   4 
   5   7   8 -15.156 25.9833   2 
   6   7   8 -23.783 28.3694   2 
   6   7   8 9.19352 14.7079   4 
   4  -8  -8 49.0823 17.7286   4 
  -4   8   8 65.3309 28.9564   1 
   3  -8  -8 6.98062 12.2498   4 
  -3   8   8 80.9517 18.3929   4 
  -3   8   8 -27.493 17.1833   1 
   2  -8  -8 118.312 20.2309   4 
  -2   8   8 135.847 22.3129   4 
  -2   8   8 125.167 23.6489   1 
   1  -8  -8 580.379 37.1536   4 
  -1   8   8 622.719 45.9939   2 
  -1   8   8 594.191 39.1323   4 
  -1   8   8 571.151 43.2526   1 
   0  -8  -8 16.3724 10.5129   4 
   0   8   8 43.8692 16.8722   2 
   0   8   8 31.8525 15.4678   1 
   0   8   8 6.72944 8.44201   4 
  -1  -8  -8 328.504 25.6379   4 
   1   8   8 317.251 30.0710   1 
   1   8   8 289.393 25.8436   4 
   2   8   8 218.154 20.2345   4 
   2   8   8 182.528 33.1961   2 
   3   8   8 80.9238 28.0890   2 
   4   8   8 367.014 46.4002   2 
   5   8   8 28.5531 26.0967   2 
   5   8   8 26.1026 12.0282   4 
   3  -9  -8 22.2630 15.2441   4 
   2  -9  -8 67.8960 27.8763   3 
   2  -9  -8 88.6255 18.0444   4 
  -2   9   8 66.9446 21.5264   1 
   1  -9  -8 430.873 42.5400   4 
   1  -9  -8 447.648 44.5472   3 
  -1   9   8 474.743 43.1692   2 
  -1   9   8 505.516 34.6730   4 
   0  -9  -8 19.6464 10.3830   4 
   0  -9  -8 10.7075 17.2422   3 
   0   9   8 32.7666 21.1692   2 
   0   9   8 -11.810 11.8843   1 
   0   9   8 17.0109 12.6924   4 
  -1  -9  -8 329.651 25.7628   4 
   1   9   8 348.492 27.5479   4 
   1   9   8 363.596 36.9563   1 
   1   9   8 418.251 41.8343   2 
   2   9   8 381.140 26.9444   4 
   2   9   8 358.037 57.1741   1 
   2   9   8 377.463 45.8412   2 
   3   9   8 294.419 47.1602   2 
   3   9   8 327.316 24.5215   4 
   4   9   8 144.777 36.8095   2 
   4   9   8 204.383 20.2681   4 
   5   9   8 25.7764 11.8935   4 
   5   9   8 69.0304 36.1988   2 
   2 -10  -8 4.79478 12.8217   4 
   2 -10  -8 -5.3770 25.4152   3 
  -2  10   8 -27.939 25.4193   2 
   1 -10  -8 50.7083 14.9910   4 
   1 -10  -8 93.1109 24.8008   3 
  -1  10   8 117.397 29.4229   2 
  -1  10   8 45.9400 30.9637   1 
   0 -10  -8 3.81850 11.2055   4 
   0 -10  -8 18.3303 19.2481   3 
   0  10   8 34.3062 20.7030   2 
   0  10   8 2.42165 14.1065   4 
   0  10   8 -16.442 15.5635   1 
  -1 -10  -8 3.59025 9.93281   4 
   1  10   8 20.8561 17.4764   1 
   1  10   8 71.8116 12.7368   4 
   1  10   8 27.2147 23.2723   2 
   2  10   8 46.8934 25.6349   2 
   2  10   8 39.4022 19.6486   1 
   2  10   8 49.7919 13.4734   4 
   3  10   8 29.2487 24.5148   1 
   3  10   8 30.0516 27.6700   2 
   4  10   8 -29.674 26.9350   2 
   1 -11  -8 3.02927 12.2075   4 
   1 -11  -8 -63.797 23.0834   3 
  -1  11   8 -35.828 20.9793   2 
   0 -11  -8 4.23323 12.4797   4 
   0 -11  -8 7.84354 18.0273   3 
   0  11   8 -0.8208 22.4242   2 
   1  11   8 -0.2523 24.0083   2 
   2  11   8 -24.041 23.2338   2 
   3  11   8 4.52306 23.9001   2 
   2   3  -9 57.9545 31.8143   2 
   2   3  -9 -39.799 20.4721   3 
   1   3  -9 -17.366 23.3534   3 
  -1  -3   9 -16.200 15.7236   4 
   3   2  -9 59.7866 19.0150   4 
   3   2  -9 26.0340 24.6218   3 
   3   2  -9 96.6967 24.5907   2 
  -3  -2   9 38.2873 17.3638   4 
   2   2  -9 172.588 31.4929   2 
   2   2  -9 38.2184 20.8435   3 
  -2  -2   9 63.9936 18.5131   4 
   1   2  -9 14.5681 20.5058   3 
   1   2  -9 36.9485 28.8466   2 
  -1  -2   9 -23.259 15.8586   3 
  -1  -2   9 -13.273 12.5090   4 
   0   2  -9 49.6107 24.1753   3 
   0   2  -9 38.3873 29.9003   2 
   0  -2   9 28.3442 20.1011   3 
   0  -2   9 28.1052 15.3703   4 
  -1   2  -9 -9.6570 22.6979   3 
   1  -2   9 -15.364 19.3584   3 
  -2   2  -9 49.1275 28.8408   3 
   2  -2   9 4.99005 23.0740   3 
   4   1  -9 154.348 35.2480   3 
   4   1  -9 174.299 27.0901   4 
  -4  -1   9 158.179 30.4850   4 
   3   1  -9 56.6381 21.7427   3 
   3   1  -9 102.074 31.9617   2 
   3   1  -9 38.2483 14.4242   4 
  -3  -1   9 52.7298 20.6753   4 
   2   1  -9 47.7306 22.5260   3 
   2   1  -9 64.2942 18.8973   4 
   2   1  -9 82.1471 30.4464   2 
  -2  -1   9 38.5636 18.5582   4 
   1   1  -9 8.61616 22.9389   2 
   1   1  -9 13.8162 16.7567   3 
  -1  -1   9 -1.5027 12.3691   4 
   0   1  -9 76.7696 21.2126   3 
   0   1  -9 95.7420 29.9454   2 
   0  -1   9 82.5236 24.0112   3 
  -1   1  -9 362.575 47.1133   2 
  -1   1  -9 298.692 38.4086   3 
   1  -1   9 291.059 30.9823   4 
   1  -1   9 456.679 41.3767   3 
  -2   1  -9 47.6677 50.4975   2 
  -2   1  -9 54.3697 22.1241   3 
   2  -1   9 33.9396 31.4288   2 
   2  -1   9 41.9113 22.6924   3 
   2  -1   9 49.8492 17.1892   4 
  -3   1  -9 98.4644 28.1266   3 
   3  -1   9 203.835 34.4571   1 
   3  -1   9 178.875 42.5270   2 
   3  -1   9 318.652 38.4779   3 
   5   0  -9 -21.861 18.2487   3 
   5   0  -9 8.72835 15.2768   4 
   4   0  -9 450.651 47.2158   3 
   4   0  -9 310.846 31.7817   4 
  -4   0   9 356.650 41.2500   4 
   3   0  -9 81.1212 18.8647   4 
   3   0  -9 56.2158 22.0963   3 
  -3   0   9 53.7101 21.3961   4 
   2   0  -9 278.777 34.4324   2 
   2   0  -9 233.864 34.8443   3 
   2   0  -9 231.442 26.4475   4 
  -2   0   9 221.144 30.1163   4 
   1   0  -9 572.744 46.0646   3 
   1   0  -9 681.726 52.2444   2 
  -1   0   9 510.997 38.7550   4 
   0   0  -9 31.1952 22.0759   2 
   0   0  -9 18.2105 17.2633   3 
   0   0   9 46.2861 14.1932   4 
   0   0   9 59.5810 28.7828   2 
  -1   0  -9 446.833 44.2999   3 
  -1   0  -9 514.514 51.6797   2 
   1   0   9 463.405 51.8851   2 
   1   0   9 614.712 45.1538   3 
   1   0   9 446.153 35.9157   4 
  -2   0  -9 194.360 35.5333   3 
  -2   0  -9 141.023 34.1250   2 
   2   0   9 198.714 30.8778   3 
   2   0   9 202.680 43.6746   2 
   2   0   9 164.862 25.1934   4 
  -3   0  -9 152.164 28.5154   3 
   3   0   9 104.660 34.0561   2 
   3   0   9 171.632 28.3285   3 
   3   0   9 158.141 28.7685   4 
   3   0   9 117.933 26.8024   1 
   4   0   9 82.5042 35.4536   2 
   4   0   9 166.163 34.7537   1 
   5  -1  -9 3.96835 12.8077   4 
   5  -1  -9 6.48453 16.0245   3 
   4  -1  -9 255.512 28.0087   4 
   4  -1  -9 215.113 35.7285   3 
  -4   1   9 242.405 32.3347   4 
   3  -1  -9 47.5933 16.6913   4 
   3  -1  -9 58.7158 22.8182   3 
  -3   1   9 86.2405 17.2961   4 
   2  -1  -9 155.863 27.7885   2 
   2  -1  -9 229.577 34.3167   3 
   2  -1  -9 162.054 23.5340   4 
  -2   1   9 196.103 27.0663   4 
   1  -1  -9 80.8541 17.6539   4 
   1  -1  -9 75.6135 22.7525   3 
   1  -1  -9 96.6801 22.2948   2 
  -1   1   9 115.818 27.2255   2 
  -1   1   9 77.5524 15.5923   4 
   0  -1  -9 46.5763 16.6955   3 
   0  -1  -9 50.2564 19.9869   2 
   0   1   9 76.9065 30.5140   2 
   0   1   9 81.8917 19.2775   4 
  -1  -1  -9 163.374 25.1132   3 
  -1  -1  -9 180.110 31.5827   2 
   1   1   9 272.678 46.7567   2 
   1   1   9 167.302 24.0669   4 
  -2  -1  -9 330.182 35.3324   3 
  -2  -1  -9 413.073 44.7737   2 
   2   1   9 344.590 32.1651   4 
   2   1   9 394.421 49.4152   2 
   2   1   9 312.522 29.2676   3 
  -3  -1  -9 30.0399 18.7433   2 
   3   1   9 -27.909 15.4341   1 
   3   1   9 32.5205 28.1879   2 
   3   1   9 15.1965 13.0540   4 
   4   1   9 148.560 31.2583   1 
   4   1   9 125.327 41.8512   2 
   5  -2  -9 32.6451 13.5835   4 
   4  -2  -9 -17.858 16.5918   3 
   4  -2  -9 11.5731 12.1558   4 
  -4   2   9 -14.053 12.9440   4 
   3  -2  -9 95.4045 19.1038   4 
   3  -2  -9 98.3935 24.6293   3 
  -3   2   9 102.748 21.1192   4 
   2  -2  -9 35.3119 17.8165   3 
   2  -2  -9 28.9469 12.7425   4 
   2  -2  -9 33.0509 15.0029   2 
  -2   2   9 21.8698 13.3391   4 
   1  -2  -9 37.5158 15.8215   2 
   1  -2  -9 9.70611 14.5981   3 
   1  -2  -9 21.3081 11.8537   4 
  -1   2   9 26.6499 19.6851   2 
  -1   2   9 9.18722 10.3671   4 
   0  -2  -9 3.47215 14.4828   2 
   0  -2  -9 28.8963 13.1626   3 
   0  -2  -9 -3.5641 9.80998   4 
   0   2   9 15.9128 10.6520   4 
   0   2   9 24.9534 21.5818   2 
  -1  -2  -9 19.0471 13.3695   2 
  -1  -2  -9 10.9698 12.6078   3 
   1   2   9 28.9335 11.3413   4 
   1   2   9 8.98044 18.7004   2 
  -2  -2  -9 165.150 32.9458   2 
   2   2   9 197.411 38.1237   2 
   2   2   9 170.789 32.6709   1 
   2   2   9 161.391 24.8555   4 
   3   2   9 -34.512 17.3839   2 
   3   2   9 23.7765 14.4814   1 
   3   2   9 9.76783 12.1710   4 
  -4  -2  -9 94.5115 31.6955   2 
   4   2   9 103.271 22.8073   4 
   4   2   9 91.1055 27.5157   1 
   4   2   9 90.0597 36.6240   2 
   5   2   9 -54.583 22.6737   2 
   5  -3  -9 14.1013 15.5621   4 
   5  -3  -9 4.08220 21.1666   3 
   4  -3  -9 83.0296 22.6870   3 
   4  -3  -9 69.2239 19.3738   4 
  -4   3   9 44.5641 20.0139   4 
   3  -3  -9 80.6074 22.8427   3 
   3  -3  -9 59.7163 17.3152   4 
  -3   3   9 69.3725 19.8542   4 
   2  -3  -9 35.9242 12.4658   4 
   2  -3  -9 32.6249 18.2897   3 
  -2   3   9 10.1589 12.2400   4 
   1  -3  -9 44.0693 15.7442   3 
   1  -3  -9 72.3610 17.4284   2 
   1  -3  -9 32.9407 12.2897   4 
  -1   3   9 79.5958 25.6868   2 
  -1   3   9 35.4715 12.4801   4 
   0  -3  -9 10.4943 13.5906   3 
   0  -3  -9 20.6478 11.5834   4 
   0  -3  -9 25.8201 16.2821   2 
   0   3   9 35.8530 12.4009   4 
   0   3   9 43.1959 18.7405   2 
  -1  -3  -9 2.89148 11.8293   3 
  -1  -3  -9 16.5447 14.7390   2 
   1   3   9 41.2239 19.7135   2 
   1   3   9 11.7761 8.81422   4 
  -2  -3  -9 17.2498 16.4749   2 
   2   3   9 11.2358 18.9754   2 
   2   3   9 21.0096 10.7881   4 
  -3  -3  -9 141.349 29.7181   2 
   3   3   9 152.835 29.5880   1 
   3   3   9 189.624 37.5119   2 
   3   3   9 100.210 20.9578   4 
  -4  -3  -9 177.781 35.6708   2 
   4   3   9 212.653 37.5420   1 
   4   3   9 226.289 41.1979   2 
   5   3   9 170.551 78.3663   2 
   5   3   9 270.234 44.0632   1 
   5  -4  -9 -30.270 14.8250   4 
   5  -4  -9 2.43826 25.1229   3 
   4  -4  -9 22.0738 12.1924   4 
   4  -4  -9 39.3595 18.8348   3 
  -4   4   9 1.85768 12.7857   4 
   3  -4  -9 325.557 36.8175   3 
   3  -4  -9 284.162 28.1858   4 
  -3   4   9 274.315 31.4941   4 
   2  -4  -9 71.7417 29.8963   3 
   2  -4  -9 48.2869 15.3559   4 
  -2   4   9 42.9958 13.8512   4 
   1  -4  -9 784.984 47.1706   4 
   1  -4  -9 886.337 50.8067   2 
   1  -4  -9 888.537 53.9546   3 
  -1   4   9 820.448 49.1908   4 
  -1   4   9 917.758 56.7366   2 
   0  -4  -9 443.656 35.5697   2 
   0  -4  -9 329.793 30.1303   4 
   0  -4  -9 390.744 33.5821   3 
   0   4   9 425.685 42.3243   2 
   0   4   9 370.138 29.6452   4 
  -1  -4  -9 78.7160 21.9671   2 
   1   4   9 76.8773 21.9516   2 
   1   4   9 36.4266 13.6409   4 
  -2  -4  -9 1124.44 67.7776   2 
   2   4   9 917.460 52.8426   4 
   2   4   9 1160.05 73.8431   2 
  -3  -4  -9 152.306 31.7218   2 
   3   4   9 135.431 32.3128   2 
   3   4   9 129.409 20.8634   4 
  -4  -4  -9 388.120 44.6039   2 
   4   4   9 429.730 51.3510   2 
   4   4   9 310.616 29.5437   4 
   4   4   9 344.352 41.2850   1 
   5   4   9 404.888 47.4210   1 
   5   4   9 278.741 49.9439   2 
   5   4   9 285.061 31.9405   4 
   5  -5  -9 34.3898 18.1104   4 
   4  -5  -9 -0.9981 12.4515   4 
  -4   5   9 17.7616 13.3278   4 
   3  -5  -9 225.223 25.3269   4 
  -3   5   9 198.200 29.1407   4 
   2  -5  -9 42.7878 15.9629   4 
   2  -5  -9 55.6150 22.1618   3 
  -2   5   9 75.1659 17.3437   1 
  -2   5   9 64.1576 16.6398   4 
   1  -5  -9 1037.52 59.3501   3 
   1  -5  -9 1032.99 54.2136   4 
  -1   5   9 1042.65 61.2323   2 
  -1   5   9 1055.99 54.3338   1 
  -1   5   9 975.573 55.0749   4 
   0  -5  -9 42.4484 13.1560   3 
   0  -5  -9 63.4001 19.0044   4 
   0  -5  -9 49.4597 18.2630   2 
   0   5   9 71.2141 23.1712   2 
   0   5   9 33.5510 12.0237   4 
  -1  -5  -9 66.6804 20.9245   2 
   1   5   9 71.4475 27.4211   2 
   1   5   9 67.4314 13.1367   4 
  -2  -5  -9 755.241 54.9914   2 
   2   5   9 651.791 41.1754   4 
   2   5   9 770.023 59.5398   2 
  -3  -5  -9 199.980 35.1366   2 
   3   5   9 234.188 44.9573   2 
   3   5   9 261.492 24.3048   4 
  -4  -5  -9 117.501 28.9428   2 
   4   5   9 114.488 21.9310   4 
   4   5   9 72.1627 30.4067   2 
   5   5   9 256.305 27.3378   4 
   5   5   9 241.162 48.6274   2 
   5   5   9 222.846 39.2413   1 
   5  -6  -9 -12.395 12.9902   4 
   4  -6  -9 29.6171 14.7319   4 
  -4   6   9 9.57077 21.0548   1 
  -4   6   9 46.9039 16.6101   4 
   3  -6  -9 92.9715 20.6608   4 
  -3   6   9 99.6008 25.0473   4 
  -3   6   9 116.954 24.8331   1 
   2  -6  -9 2.88555 8.54338   4 
  -2   6   9 4.26341 13.0024   1 
  -2   6   9 22.9638 13.0250   4 
   1  -6  -9 95.3957 16.5318   4 
  -1   6   9 127.191 27.3733   2 
  -1   6   9 122.797 21.5964   1 
  -1   6   9 125.400 21.6093   4 
   0  -6  -9 25.1443 18.0718   4 
   0   6   9 31.0214 19.2464   2 
   0   6   9 35.0419 15.5028   1 
   0   6   9 21.5379 11.2036   4 
  -1  -6  -9 163.444 23.9695   4 
   1   6   9 245.185 36.6067   2 
   1   6   9 232.096 24.1192   4 
  -2  -6  -9 101.740 24.3155   2 
   2   6   9 45.9508 22.9406   2 
   2   6   9 133.346 20.5633   4 
  -3  -6  -9 115.861 26.7759   2 
   3   6   9 148.211 31.1478   2 
   3   6   9 137.807 21.5067   4 
  -4  -6  -9 21.9309 17.8096   2 
   4   6   9 -28.907 19.5189   2 
   4   6   9 -5.8257 10.7319   4 
   5   6   9 75.5718 35.7973   2 
   4  -7  -9 -21.249 11.2571   4 
  -4   7   9 -51.475 21.1594   1 
   3  -7  -9 25.0589 15.0709   4 
  -3   7   9 60.6469 18.5996   4 
  -3   7   9 26.1884 20.3383   1 
   2  -7  -9 92.2918 18.7372   4 
  -2   7   9 82.4205 17.4045   4 
  -2   7   9 85.6441 20.3492   1 
   1  -7  -9 8.34329 10.8698   4 
  -1   7   9 23.5074 20.1501   2 
  -1   7   9 8.04330 14.0297   1 
  -1   7   9 35.2502 12.2019   4 
   0  -7  -9 39.5377 16.6931   4 
   0   7   9 41.0415 17.8986   1 
   0   7   9 18.9083 12.1163   4 
   0   7   9 19.6694 20.6085   2 
  -1  -7  -9 25.6594 12.9057   4 
   1   7   9 22.4204 13.3617   4 
   1   7   9 36.0193 38.3445   2 
   2   7   9 14.5881 23.3411   2 
   2   7   9 37.2345 11.3983   4 
   3   7   9 5.84154 8.87210   4 
   3   7   9 5.38462 18.4083   2 
   4   7   9 11.1487 23.5443   2 
   4   7   9 -5.9969 10.6336   4 
   5   7   9 -9.6111 13.8322   4 
   5   7   9 37.8448 38.6194   2 
   4  -8  -9 -9.8227 13.7162   4 
   3  -8  -9 28.0051 14.6863   4 
  -3   8   9 32.5642 17.4808   4 
  -3   8   9 27.6491 21.6341   1 
   2  -8  -9 193.513 25.6477   4 
  -2   8   9 154.771 31.7286   1 
  -2   8   9 268.568 34.8870   4 
   1  -8  -9 138.221 21.9708   4 
  -1   8   9 95.1060 25.3083   2 
  -1   8   9 82.4840 19.6304   4 
  -1   8   9 102.080 24.6020   1 
   0   8   9 454.710 43.3129   2 
   0   8   9 393.373 31.1810   4 
   0   8   9 334.210 35.0772   1 
  -1  -8  -9 30.5155 12.8500   4 
   1   8   9 58.5861 23.4860   2 
   1   8   9 87.1921 16.7422   4 
   1   8   9 39.5544 15.6916   1 
   2   8   9 232.962 24.0549   4 
   2   8   9 317.172 40.5855   2 
   3   8   9 229.447 22.9090   4 
   3   8   9 248.689 42.2617   2 
   4   8   9 47.5726 26.8361   2 
   4   8   9 51.3240 14.5166   4 
   5   8   9 307.077 53.6384   2 
   5   8   9 301.153 27.2405   4 
   3  -9  -9 39.9899 17.8783   4 
   2  -9  -9 185.195 23.8205   4 
  -2   9   9 203.223 28.9755   4 
  -2   9   9 196.798 33.1088   1 
   1  -9  -9 38.0251 14.2322   4 
  -1   9   9 110.612 26.4005   2 
  -1   9   9 94.7096 21.3965   4 
  -1   9   9 101.170 23.8881   1 
   0  -9  -9 140.233 25.4683   4 
   0  -9  -9 113.077 23.1604   3 
   0   9   9 124.933 27.7873   2 
   0   9   9 135.526 20.4691   4 
   0   9   9 171.054 25.9759   1 
  -1  -9  -9 134.932 20.3332   4 
   1   9   9 187.767 36.3725   2 
   1   9   9 127.489 24.8067   1 
   1   9   9 163.073 21.8319   4 
   2   9   9 168.995 25.4031   1 
   2   9   9 246.834 24.2353   4 
   2   9   9 309.668 49.0746   2 
   3   9   9 318.690 26.0182   4 
   3   9   9 296.309 49.7733   2 
   4   9   9 39.5598 12.9420   4 
   2 -10  -9 90.0408 33.2754   3 
   1 -10  -9 -17.124 10.5046   4 
   1 -10  -9 13.3115 21.1634   3 
  -1  10   9 6.27872 21.2412   2 
  -1  10   9 -12.226 17.4909   4 
   0 -10  -9 25.8219 20.2750   3 
   0 -10  -9 45.8518 14.2170   4 
   0  10   9 76.8206 26.3820   2 
   0  10   9 122.785 20.0831   4 
  -1 -10  -9 125.739 19.3728   4 
   1  10   9 103.638 17.7997   4 
   1  10   9 94.3541 32.1721   2 
   2  10   9 -24.554 11.6031   4 
   2  10   9 21.2187 26.0986   2 
   3  10   9 67.4724 30.9454   2 
   3  10   9 42.7870 20.9868   4 
   4  10   9 101.133 31.6412   2 
   0 -11  -9 -29.309 20.2479   3 
   0 -11  -9 -9.4494 13.1388   4 
   0  11   9 -24.235 23.7855   2 
  -1 -11  -9 -5.8043 12.1018   4 
   1  11   9 28.5893 15.0629   4 
   1  11   9 -27.844 23.6655   2 
   3   1 -10 79.8061 28.1035   3 
   3   1 -10 73.1789 28.1798   4 
   1   1 -10 87.7925 29.8514   2 
   1   1 -10 66.3511 28.5651   3 
   0   1 -10 169.150 32.8921   3 
   0   1 -10 201.079 59.4973   2 
  -1   1 -10 202.908 38.7627   3 
   1  -1  10 315.861 39.5746   3 
   3   0 -10 134.762 45.9458   3 
   3   0 -10 99.6504 22.0444   4 
   2   0 -10 402.159 45.1653   3 
   2   0 -10 430.960 37.8037   4 
   2   0 -10 464.276 44.6911   2 
  -2   0  10 380.911 36.6901   4 
   1   0 -10 5.97581 21.9427   2 
   1   0 -10 11.5213 17.9881   3 
  -1   0  10 21.7773 14.3448   4 
   0   0 -10 566.903 52.7344   2 
   0   0 -10 638.495 50.3252   3 
   0   0  10 587.324 42.4669   4 
  -1   0 -10 153.638 30.6519   3 
  -1   0 -10 107.502 30.8657   2 
   1   0  10 193.580 39.8414   4 
   1   0  10 218.192 44.7564   2 
  -2   0 -10 65.4205 24.4092   3 
   2   0  10 130.500 26.3029   3 
   2   0  10 56.8909 44.9031   2 
   4  -1 -10 -6.9402 19.3909   4 
   4  -1 -10 38.6406 22.7476   3 
   3  -1 -10 131.578 30.7521   3 
   3  -1 -10 62.6239 19.0129   4 
  -3   1  10 109.132 22.3175   4 
   2  -1 -10 109.272 27.1545   3 
   2  -1 -10 119.471 21.8476   4 
  -2   1  10 115.697 25.5345   4 
   1  -1 -10 39.2427 14.5977   4 
   1  -1 -10 69.4273 21.1742   2 
   1  -1 -10 53.0643 17.4410   3 
  -1   1  10 51.9975 16.5538   4 
   0  -1 -10 27.9748 17.1611   2 
   0  -1 -10 20.5676 20.8638   3 
   0   1  10 26.9195 20.7618   2 
   0   1  10 14.3935 14.3803   4 
  -1  -1 -10 94.2844 25.7184   3 
  -1  -1 -10 92.2096 32.1524   2 
   1   1  10 81.2510 33.0563   2 
   1   1  10 85.1506 18.2878   4 
  -2  -1 -10 25.6881 21.4547   2 
  -2  -1 -10 0.93196 31.9073   3 
   2   1  10 6.25165 14.6650   4 
   2   1  10 35.8490 29.5425   2 
   3   1  10 92.6727 27.3698   1 
   3   1  10 95.5794 38.0688   2 
   4  -2 -10 98.8872 43.0699   3 
   4  -2 -10 52.9685 20.0450   4 
   3  -2 -10 1.20936 10.7925   4 
   3  -2 -10 1.47472 17.7531   3 
  -3   2  10 -16.803 11.8614   4 
   2  -2 -10 -6.1809 15.3052   2 
   2  -2 -10 43.2883 21.9901   3 
   2  -2 -10 -1.4820 13.1785   4 
  -2   2  10 -7.3759 11.5854   4 
   1  -2 -10 -14.372 13.6960   3 
   1  -2 -10 28.5706 17.1901   2 
   1  -2 -10 14.7042 13.2826   4 
  -1   2  10 18.9905 26.2953   2 
  -1   2  10 38.4264 24.4343   4 
   0  -2 -10 24.4225 15.8590   2 
   0  -2 -10 5.35642 19.1565   3 
   0   2  10 36.7144 15.5107   4 
   0   2  10 37.5135 23.2376   2 
  -1  -2 -10 58.8360 23.2958   2 
  -1  -2 -10 5.21837 16.1814   3 
   1   2  10 19.5791 11.9077   4 
   1   2  10 34.7082 25.5249   2 
  -2  -2 -10 -6.7699 16.2661   2 
   2   2  10 -11.552 11.0771   4 
   2   2  10 -12.898 19.6360   2 
   3   2  10 20.3698 25.3438   2 
   3   2  10 44.2800 24.6779   1 
   4   2  10 -56.280 20.4020   2 
   4   2  10 -6.7454 21.6976   1 
   4  -3 -10 5.85836 12.5049   4 
   4  -3 -10 43.0942 21.9165   3 
   3  -3 -10 -13.343 16.0916   3 
   3  -3 -10 -16.273 11.0011   4 
  -3   3  10 7.43958 12.7080   4 
   2  -3 -10 205.538 27.8229   4 
   2  -3 -10 212.289 33.5385   3 
  -2   3  10 226.539 31.7359   4 
   1  -3 -10 59.5890 20.7416   3 
   1  -3 -10 77.6161 19.8348   4 
   1  -3 -10 48.0132 18.7295   2 
  -1   3  10 38.6936 22.7864   2 
  -1   3  10 47.2476 13.1135   4 
   0  -3 -10 71.6085 19.0795   3 
   0  -3 -10 68.3179 17.6402   4 
   0  -3 -10 97.6196 25.2374   2 
   0   3  10 67.9570 30.5584   2 
   0   3  10 63.2520 16.1864   4 
  -1  -3 -10 15.3773 13.8520   3 
  -1  -3 -10 8.62313 16.9120   2 
   1   3  10 75.4610 25.6498   2 
   1   3  10 40.9676 13.5787   4 
  -2  -3 -10 111.446 27.7852   2 
   2   3  10 64.5710 18.9923   4 
   2   3  10 167.391 37.5919   2 
  -3  -3 -10 30.3753 21.9394   2 
   3   3  10 18.9338 27.8867   2 
   3   3  10 -5.8542 20.1513   1 
   3   3  10 4.05452 13.9472   4 
   4   3  10 213.411 67.2406   2 
   4   3  10 231.736 38.4840   1 
   4  -4 -10 144.395 30.7377   3 
   4  -4 -10 117.203 26.5296   4 
   3  -4 -10 -27.267 14.9279   3 
   3  -4 -10 2.07486 11.8051   4 
  -3   4  10 16.5381 16.1038   4 
   2  -4 -10 809.966 55.4294   3 
   2  -4 -10 580.940 43.4459   4 
  -2   4  10 691.272 62.5527   4 
   1  -4 -10 40.2669 16.8233   2 
   1  -4 -10 57.4451 18.2166   4 
  -1   4  10 55.4540 23.6167   2 
  -1   4  10 47.9436 15.4246   4 
   0  -4 -10 25.8631 17.4643   3 
   0  -4 -10 27.4394 16.7735   2 
   0  -4 -10 31.8012 14.3485   4 
   0   4  10 27.3501 20.9013   2 
   0   4  10 36.6024 13.1593   4 
  -1  -4 -10 728.901 51.8217   2 
   1   4  10 716.647 57.4695   2 
   1   4  10 561.103 39.4834   4 
  -2  -4 -10 285.602 34.0266   2 
   2   4  10 257.656 26.1070   4 
   2   4  10 201.536 40.4482   2 
  -3  -4 -10 340.772 41.8083   2 
   3   4  10 217.534 29.2623   4 
   3   4  10 264.144 41.9897   2 
   4   4  10 329.937 46.2920   1 
   4   4  10 249.900 33.8507   4 
   4   4  10 336.441 54.6419   2 
   4  -5 -10 157.959 33.9573   3 
   4  -5 -10 103.576 31.9188   4 
   3  -5 -10 15.4090 12.2237   4 
   3  -5 -10 43.0901 23.0821   3 
  -3   5  10 26.5628 19.7741   4 
   2  -5 -10 396.394 35.4812   4 
   2  -5 -10 465.609 43.5777   3 
  -2   5  10 323.813 51.3789   4 
   1  -5 -10 62.7053 14.8562   4 
   1  -5 -10 26.6448 16.8128   3 
   1  -5 -10 72.6897 16.1861   2 
  -1   5  10 21.6488 13.9606   4 
  -1   5  10 86.8164 27.8824   2 
   0  -5 -10 31.6772 13.6982   4 
   0  -5 -10 0.27132 14.1993   3 
   0  -5 -10 5.03566 13.9611   2 
   0   5  10 4.27000 11.6819   4 
   0   5  10 23.3008 19.7107   2 
  -1  -5 -10 321.126 36.4076   2 
   1   5  10 370.223 42.1663   2 
   1   5  10 323.379 28.7266   4 
  -2  -5 -10 144.425 28.6998   2 
   2   5  10 145.410 32.0334   2 
   2   5  10 159.577 23.0127   4 
  -3  -5 -10 92.6361 27.3890   2 
   3   5  10 140.133 35.5752   2 
   3   5  10 114.026 20.9615   4 
   4   5  10 242.280 29.8357   4 
   4   5  10 200.174 38.3484   2 
   5   5  10 -4.5410 23.6683   1 
   5   5  10 -52.529 23.3371   2 
   4  -6 -10 10.3280 14.9603   4 
   3  -6 -10 -7.5726 10.2872   4 
  -3   6  10 -18.497 13.9917   4 
  -3   6  10 -34.097 16.7831   1 
   2  -6 -10 110.263 22.9993   3 
   2  -6 -10 73.0275 17.6307   4 
  -2   6  10 106.157 25.0571   4 
  -2   6  10 111.720 24.2274   1 
   1  -6 -10 11.5603 16.7006   3 
   1  -6 -10 4.76441 11.0032   4 
  -1   6  10 27.4717 19.7133   2 
  -1   6  10 2.62684 15.0489   1 
  -1   6  10 26.4288 13.0663   4 
   0  -6 -10 232.340 29.3619   3 
   0  -6 -10 129.172 20.7212   4 
   0   6  10 170.623 25.1905   1 
   0   6  10 156.056 23.5962   4 
   0   6  10 175.775 35.2887   2 
  -1  -6 -10 102.822 19.0029   4 
  -1  -6 -10 116.935 27.1246   2 
   1   6  10 148.791 33.8385   2 
   1   6  10 124.798 19.1317   4 
  -2  -6 -10 56.5805 18.4627   2 
   2   6  10 83.3084 27.8756   2 
   2   6  10 101.503 19.8953   4 
  -3  -6 -10 7.18100 18.8585   2 
   3   6  10 19.8179 25.8036   2 
   3   6  10 21.1599 11.2844   4 
   4   6  10 53.3677 31.4926   2 
   5   6  10 51.7644 18.0915   4 
   5   6  10 -3.0219 28.2613   2 
   4  -7 -10 1.53322 12.2686   4 
   3  -7 -10 11.9581 13.5643   4 
  -3   7  10 16.1589 30.6378   1 
   2  -7 -10 55.2063 14.3468   4 
  -2   7  10 45.6847 14.3239   4 
  -2   7  10 54.9243 22.4616   1 
   1  -7 -10 59.6540 16.5904   4 
  -1   7  10 69.1170 22.8088   1 
  -1   7  10 84.8164 26.2939   2 
  -1   7  10 85.7386 17.4791   4 
   0  -7 -10 -4.5637 16.2232   3 
   0  -7 -10 -1.4768 8.25378   4 
   0   7  10 7.32100 39.0126   2 
   0   7  10 20.6517 16.0857   1 
   0   7  10 -15.771 11.6567   4 
  -1  -7 -10 22.8193 13.1879   4 
   1   7  10 13.0872 11.0267   4 
   1   7  10 17.5525 21.9233   2 
   2   7  10 65.9512 28.0339   2 
   2   7  10 65.0360 16.6369   4 
   3   7  10 33.1156 24.7242   2 
   3   7  10 2.04772 11.7357   4 
   4   7  10 97.0917 16.8754   4 
   4   7  10 46.6526 31.4623   2 
   3  -8 -10 113.855 21.5418   4 
  -3   8  10 82.3077 32.7527   1 
   2  -8 -10 51.6631 17.3543   4 
  -2   8  10 62.3838 24.5612   1 
  -2   8  10 37.9192 18.6395   4 
   1  -8 -10 315.554 31.7916   4 
  -1   8  10 411.512 56.3872   1 
  -1   8  10 362.268 40.0281   2 
  -1   8  10 418.225 34.6202   4 
   0  -8 -10 71.7142 18.0438   4 
   0   8  10 104.436 27.6624   2 
   0   8  10 61.6366 17.9764   4 
  -1  -8 -10 368.793 31.9549   4 
   1   8  10 440.356 46.2459   2 
   1   8  10 371.955 31.8663   4 
   1   8  10 366.219 36.3772   1 
   2   8  10 207.852 25.9860   4 
   2   8  10 202.942 39.8377   2 
   3   8  10 21.4853 25.1597   2 
   3   8  10 17.9280 11.1053   4 
   4   8  10 202.319 49.2159   2 
   4   8  10 195.437 23.8338   4 
   2  -9 -10 68.2952 17.2115   4 
  -2   9  10 57.1873 21.7710   4 
   1  -9 -10 128.497 22.2548   4 
  -1   9  10 117.892 32.0104   1 
  -1   9  10 236.510 31.5107   4 
  -1   9  10 193.287 30.8808   2 
   0  -9 -10 81.0797 17.7606   4 
   0   9  10 139.723 23.8248   4 
   0   9  10 85.7792 30.7025   2 
   0   9  10 112.912 27.0120   1 
  -1  -9 -10 76.1182 17.9233   4 
   1   9  10 115.035 24.2468   1 
   1   9  10 58.1624 16.4712   4 
   1   9  10 86.3807 29.7078   2 
   2   9  10 88.9242 30.7215   2 
   2   9  10 107.317 19.0106   4 
   3   9  10 32.8258 32.0508   2 
   3   9  10 72.3425 16.7676   4 
   4   9  10 92.9951 19.3339   4 
   4   9  10 43.8051 32.7757   2 
   1 -10 -10 41.4279 17.1106   4 
   1 -10 -10 51.4600 48.0061   3 
  -1  10  10 52.5158 30.5006   2 
  -1  10  10 11.9365 15.6935   4 
   0 -10 -10 56.0686 24.4965   3 
   0 -10 -10 67.6997 17.1546   4 
   0  10  10 92.9995 18.0297   4 
   0  10  10 85.6950 28.1973   2 
  -1 -10 -10 -7.9160 13.1406   4 
   1  10  10 -15.684 12.7017   4 
   1  10  10 35.2130 28.7474   2 
   2  10  10 -25.687 14.8759   4 
   2  10  10 29.2974 24.5179   2 
   3  10  10 157.479 20.7673   4 
   3  10  10 151.605 37.6139   2 
   2  -1 -11 -8.3084 13.0048   4 
   2  -1 -11 20.4247 16.9382   2 
   2  -1 -11 10.4997 19.0957   3 
   1  -1 -11 -7.6190 18.3929   3 
   1  -1 -11 32.1943 27.6062   2 
   0  -1 -11 64.0981 25.3456   3 
   0  -1 -11 106.541 25.2325   2 
   0   1  11 109.525 34.6836   2 
  -1  -1 -11 34.6407 21.2005   3 
   1   1  11 61.0901 34.8254   2 
   3  -2 -11 -11.037 14.3971   4 
   2  -2 -11 6.21361 18.1509   2 
   2  -2 -11 19.5537 24.1723   3 
   2  -2 -11 17.8444 21.5868   4 
   1  -2 -11 17.7855 13.8413   4 
   1  -2 -11 16.4462 18.0114   3 
   1  -2 -11 12.7096 16.3026   2 
  -1   2  11 27.3435 22.1347   2 
   0  -2 -11 13.2506 18.0681   3 
   0   2  11 -28.000 21.4947   2 
  -1  -2 -11 44.2369 26.4451   2 
  -1  -2 -11 -2.6079 18.0654   3 
   1   2  11 44.2678 27.8398   2 
   2   2  11 1.99708 33.6526   2 
   3  -3 -11 125.114 22.2697   4 
   3  -3 -11 136.794 30.8687   3 
   2  -3 -11 78.0539 20.6431   4 
   2  -3 -11 114.926 27.6522   3 
   1  -3 -11 70.2189 21.3334   2 
   1  -3 -11 44.3258 16.6901   4 
   1  -3 -11 56.8557 19.5267   3 
  -1   3  11 13.1779 27.5113   2 
  -1   3  11 43.5447 14.2869   4 
   0  -3 -11 76.8141 22.3554   3 
   0  -3 -11 154.230 29.1429   2 
   0   3  11 105.973 32.8267   2 
   0   3  11 84.8536 18.2916   4 
  -1  -3 -11 46.4025 19.8475   2 
  -1  -3 -11 10.7451 16.1845   3 
   1   3  11 73.9165 31.9008   2 
   1   3  11 30.7044 15.8653   4 
  -2  -3 -11 36.1588 29.8811   2 
   2   3  11 45.7631 33.3576   2 
   2   3  11 56.6522 25.6166   1 
   3   3  11 54.4864 25.0430   1 
   3   3  11 40.5153 36.4078   2 
   3  -4 -11 452.829 51.0320   3 
   3  -4 -11 434.810 39.3358   4 
   2  -4 -11 24.3895 13.5288   4 
   2  -4 -11 14.7439 17.3502   3 
   1  -4 -11 50.9762 18.2396   2 
   1  -4 -11 40.4749 15.4735   4 
   1  -4 -11 34.0094 19.2920   3 
  -1   4  11 64.4777 34.9578   2 
  -1   4  11 49.4302 17.1517   4 
   0  -4 -11 156.662 25.7053   4 
   0  -4 -11 186.810 30.4718   2 
   0  -4 -11 103.831 29.2946   3 
   0   4  11 210.686 40.9484   2 
   0   4  11 178.543 28.3114   4 
  -1  -4 -11 52.9578 23.3678   2 
   1   4  11 8.11396 24.2857   2 
   1   4  11 22.4550 14.9759   4 
  -2  -4 -11 236.880 41.6417   2 
   2   4  11 238.847 31.3541   4 
   2   4  11 273.457 49.7297   2 
   3   4  11 106.195 31.5160   1 
   3  -5 -11 270.083 40.1345   3 
   3  -5 -11 217.608 31.9009   4 
   2  -5 -11 3.28914 11.6578   4 
   2  -5 -11 -12.423 16.7946   3 
   1  -5 -11 19.3294 15.6345   4 
   1  -5 -11 -2.1706 15.9077   3 
   1  -5 -11 45.6466 17.0295   2 
  -1   5  11 14.5267 15.4055   4 
  -1   5  11 16.7535 21.6402   2 
   0  -5 -11 215.525 30.3062   4 
   0  -5 -11 157.967 26.7050   3 
   0  -5 -11 149.663 28.8759   2 
   0   5  11 159.372 24.2772   4 
   0   5  11 205.308 40.6127   2 
  -1  -5 -11 61.0046 22.6785   2 
   1   5  11 92.9643 28.9385   2 
   1   5  11 74.7118 18.3826   4 
  -2  -5 -11 8.15405 20.5686   2 
   2   5  11 16.3342 23.7514   2 
   2   5  11 23.4421 16.3084   4 
   3   5  11 224.680 48.1468   2 
   3  -6 -11 -3.0206 13.7790   4 
   3  -6 -11 29.5556 21.7190   3 
   2  -6 -11 37.4295 21.0242   3 
   2  -6 -11 31.5473 13.8877   4 
   1  -6 -11 22.6154 17.8573   3 
   1  -6 -11 23.6909 15.0596   4 
  -1   6  11 52.2186 15.3469   4 
  -1   6  11 31.9924 18.2443   1 
  -1   6  11 74.3897 24.0121   2 
   0  -6 -11 104.405 23.9499   2 
   0  -6 -11 84.9513 20.5109   4 
   0  -6 -11 85.1050 18.9927   3 
   0   6  11 138.957 31.5882   2 
   0   6  11 173.559 26.9632   1 
   0   6  11 88.1303 21.8968   4 
  -1  -6 -11 95.6270 25.3339   2 
   1   6  11 90.0019 33.1006   2 
   1   6  11 85.7303 19.3125   4 
  -2  -6 -11 119.554 32.2941   2 
   2   6  11 126.318 20.6444   4 
   2   6  11 96.8747 32.7217   2 
   3   6  11 123.338 33.6874   2 
   3   6  11 61.9110 19.2823   4 
   4   6  11 31.3243 26.0479   2 
   3  -7 -11 22.8105 20.3030   3 
   3  -7 -11 12.7862 14.4945   4 
  -3   7  11 -17.668 27.2024   1 
   2  -7 -11 -5.0273 11.7580   4 
   2  -7 -11 10.9805 18.8934   3 
  -2   7  11 -6.0248 37.7863   1 
   1  -7 -11 13.1443 13.9387   4 
   1  -7 -11 -12.510 16.2975   3 
  -1   7  11 43.7748 35.5903   1 
  -1   7  11 8.57442 20.6115   2 
  -1   7  11 -11.965 15.3551   4 
   0  -7 -11 13.8076 13.7220   4 
   0   7  11 18.0941 26.0779   2 
   0   7  11 -30.327 11.2882   4 
   1   7  11 87.7030 20.9308   4 
   1   7  11 90.0917 35.7619   2 
   2   7  11 -10.677 22.3878   2 
   2   7  11 13.0414 11.9265   4 
   3   7  11 140.419 23.2127   4 
   3   7  11 107.455 42.8193   2 
   2  -8 -11 95.8213 21.6394   4 
  -2   8  11 48.2207 30.5611   1 
   1  -8 -11 115.454 23.1844   3 
   1  -8 -11 64.1729 18.8862   4 
  -1   8  11 45.6605 23.9599   1 
  -1   8  11 94.0202 25.6493   4 
   0  -8 -11 167.455 25.3617   4 
   0   8  11 189.011 33.0935   1 
   0   8  11 183.253 26.8148   4 
   0   8  11 252.937 37.7501   2 
   1   8  11 43.6580 18.6880   1 
   1   8  11 60.4503 29.8219   2 
   1   8  11 51.8786 26.1830   4 
   2   8  11 -0.3031 22.9099   4 
   2   8  11 52.0917 27.5813   2 
   3   8  11 277.474 65.0993   2 
   3   8  11 366.327 29.3224   4 
   1  -9 -11 52.2954 17.0325   4 
  -1   9  11 70.8036 22.7597   4 
   0  -9 -11 95.3212 21.6024   4 
   0   9  11 101.387 30.4324   2 
   0   9  11 125.840 22.8242   4 
  -1  -9 -11 85.4028 19.1742   4 
   1   9  11 26.7584 26.5347   4 
   1   9  11 79.9035 30.5944   2 
   2   9  11 7.12011 16.1732   4 
   2   9  11 47.8599 36.9392   2 
   1  -3 -12 53.2388 23.7242   3 
   1  -3 -12 56.2981 17.3443   4 
  -1   3  12 31.3055 29.6623   2 
   0  -3 -12 60.0419 23.5045   2 
   0   3  12 41.9966 27.7888   2 
   1  -4 -12 131.822 29.6179   3 
   1  -4 -12 133.792 25.0213   4 
   1  -4 -12 163.451 31.2378   2 
  -1   4  12 165.596 40.6254   2 
   0  -4 -12 -2.2328 18.3927   2 
   0  -4 -12 -1.1490 18.0390   3 
   0   4  12 -19.083 28.3752   2 
   1   4  12 241.766 47.6279   2 
   2  -5 -12 -33.448 12.0584   4 
   2  -5 -12 25.1635 23.0293   3 
   1  -5 -12 178.067 32.1918   2 
   1  -5 -12 154.665 32.0517   3 
   1  -5 -12 179.945 28.7023   4 
  -1   5  12 276.122 48.7226   2 
   0  -5 -12 33.9996 19.3527   3 
   0   5  12 97.9521 33.7271   2 
  -1  -5 -12 59.9947 20.2612   2 
   1   5  12 71.6230 28.0008   2 
   2   5  12 298.223 76.1260   2 
   1  -6 -12 24.6934 15.0658   4 
   1  -6 -12 40.4707 22.2337   3 
  -1   6  12 15.1358 25.1054   2 
  -1   6  12 37.0623 38.0643   1 
   0  -6 -12 9.96621 17.9516   2 
   0   6  12 17.0842 24.1051   2 
   0   6  12 -9.5605 22.3358   1 
  -1  -6 -12 -30.611 18.6700   2 
   1   6  12 40.5725 27.5815   2 
   2   6  12 53.2367 46.1084   2 
   1  -7 -12 -31.934 12.0343   4 
   1  -7 -12 -36.320 18.2896   3 
  -1   7  12 -10.051 25.0425   2 
  -1   7  12 -11.998 22.4627   1 
   0  -7 -12 7.32669 19.3951   4 
   0   7  12 -3.1900 22.5744   2 
   0   7  12 11.7924 22.7088   1 
   1   7  12 -20.602 29.1058   2 
   0  -8 -12 55.7529 23.5053   4 
   0   8  12 99.9135 34.1994   2 
   1   8  12 -2.6683 26.4051   2 
   0   0   0    0.00    0.00   0 
  
 _exptl_absorpt_process_details 
) 
 SADABS 2016/2: Krause, L., Herbst-Irmer, R., Sheldrick G.M. & Stalke D., 
 J. Appl. Cryst. 48 (2015) 3-10 
) 
 _exptl_absorpt_correction_type   multi-scan 
 _exptl_absorpt_correction_T_max  0.7456 
 _exptl_absorpt_correction_T_min  0.6790 
 _exptl_special_details 
) 
 The following wavelength and cell were deduced by SADABS from the 
 direction cosines etc. They are given here for emergency use only: 
 CELL 0.71061    6.384    9.087    9.441   62.294   89.174   81.590 
) 
  
; 
_shelx_hkl_checksum   59810 
  
