# Supplementary material for: Metathesis of Ge=Ge double bonds
Source: Springer Nature journal article supplement (doi:10.1038/s41557-021-00639-9), 2021-03-01
Supplement: 41557_2021_639_MOESM36_ESM.mol [file 41557_2021_639_MOESM36_ESM.mol]

nchem.20051218C-comp10.mol
  ChemDraw01072123322D

 20 20  0  0  0  0  0  0  0  0999 V2000
   -1.6500    0.0012    0.0000 Si  0  0  0  0  0  0  0  0  0  0  0  0
   -0.8250    0.0012    0.0000 C   0  0  0  0  0  0  0  0  0  0  0  0
   -0.4125   -0.7133    0.0000 C   0  0  0  0  0  0  0  0  0  0  0  0
    0.4125   -0.7133    0.0000 C   0  0  0  0  0  0  0  0  0  0  0  0
    0.8250    0.0012    0.0000 C   0  0  0  0  0  0  0  0  0  0  0  0
    0.4125    0.7157    0.0000 C   0  0  0  0  0  0  0  0  0  0  0  0
   -0.4125    0.7157    0.0000 C   0  0  0  0  0  0  0  0  0  0  0  0
    1.6500    0.0012    0.0000 Si  0  0  0  0  0  0  0  0  0  0  0  0
    1.8635    0.7981    0.0000 C   0  0  0  0  0  0  0  0  0  0  0  0
    2.3645    0.4137    0.0000 C   0  0  0  0  0  0  0  0  0  0  0  0
   -1.8635   -0.7957    0.0000 C   0  0  0  0  0  0  0  0  0  0  0  0
   -2.3645   -0.4113    0.0000 C   0  0  0  0  0  0  0  0  0  0  0  0
    2.0625   -0.7133    0.0000 Cl  0  0  0  0  0  0  0  0  0  0  0  0
   -2.0625    0.7157    0.0000 Cl  0  0  0  0  0  0  0  0  0  0  0  0
    0.4125    2.1398    0.0000 C   0  0  0  0  0  0  0  0  0  0  0  0
    1.6458    1.4277    0.0000 C   0  0  0  0  0  0  0  0  0  0  0  0
    0.8236    1.4277    0.0000 N   0  0  0  0  0  0  0  0  0  0  0  0
   -0.8250   -1.4277    0.0000 N   0  0  0  0  0  0  0  0  0  0  0  0
   -0.4139   -2.1398    0.0000 C   0  0  0  0  0  0  0  0  0  0  0  0
   -1.6472   -1.4277    0.0000 C   0  0  0  0  0  0  0  0  0  0  0  0
  1  2  1  0      
  2  3  2  0      
  3  4  1  0      
  4  5  2  0      
  5  6  1  0      
  6  7  2  0      
  7  2  1  0      
  5  8  1  0      
  3 18  1  0      
  6 17  1  0      
  8  9  1  0      
  8 10  1  0      
  1 11  1  0      
  1 12  1  0      
  8 13  1  0      
  1 14  1  0      
 16 17  1  0      
 15 17  1  0      
 18 19  1  0      
 18 20  1  0      
M  END
